# Supplementary material for: Models of human core transcriptional regulatory circuitries
Source: HighWire-hosted journal article supplement (doi:10.1101/gr.197590.115), 2016-02-03
Supplement: Supplemental_Information.pdf [file Supplemental_Information.pdf]

## **Supplemental Information**

### **Supplemental Methods**

#### **Identification of H3K27ac ChIP-seq peaks and super-enhancers**

Among the possibilities of ChIP-seq data for SE identification, H3K27ac ChIP-seq data was used here, because this chromatin mark is specifically associated with active enhancers (Creighton et al. 2010) and is available for a wide collection of samples. Sequence reads were aligned to the hg19 version of the human genome using Bowtie (Langmead et al. 2009) with parameters -k1 -m1 --best. H3K27ac enriched regions were called using MACS 1.4.2 (Zhang et al. 2008) with parameters -p 1e-9 keep-dup=auto -w -S -space=50. ROSE ([https://bitbucket.org/young\\_computation/rose](https://bitbucket.org/young_computation/rose)) (Lovén et al. 2013) was then used to identify SEs from the H3K27ac enriched regions as described (Hnisz et al. 2013). Briefly, H3K27ac enriched regions were considered as constituent enhancers and were stitched together when they occurred within 12.5kb. In order to distinguish the H3K27ac enhancer signal from the H3K27ac promoter signal, constituent enhancers that were fully contained within +/-1kb of a RefSeq Transcription Start Site (TSS) were disregarded for stitching. Enhancer clusters that had a H3K27ac input-subtracted signal above a computed threshold defined by ranking the H3K27ac signal at enhancer clusters were identified as SEs.

#### **CRC Mapper**

##### *SE to gene assignment*

SEs identified with ROSE ([https://bitbucket.org/young\\_computation/rose](https://bitbucket.org/young_computation/rose)) (Lovén et al. 2013) are assigned to the closest transcript predicted to be expressed, where distance is

measured as the distance from the center of the SE to the TSS. As expression data does not exist for all cell types examined, H3K27ac read density is used to determine expression in each sample. H3K27ac read density in the region  $\pm 1$ kb around the TSS is used to rank each transcript in each sample. Transcripts on this ranked list are then assigned to genes. Duplicates from the resulting ranked gene list are removed and the list is subsequently used to identify the top 2/3 of ranked genes. The read density value corresponding to the last gene in the top 2/3 is used as a threshold value that can then be applied back to identify all transcripts considered expressed. The selection of top 2/3 as a threshold is based on the observation that this threshold allows recovery of the highest percentage of expressed genes while minimizing false negatives, when the results of this method are compared to microarray and RNA-seq data in H1 ESC. This ratio of expressed genes is consistent with the ratio of genes considered expressed across cell types (Ramsköld et al. 2009).

#### *Identification of candidate core TFs*

SE-assigned transcription factors (TF) are then selected from the lists of SE-assigned genes using a list of 1253 TFs consisting of the intersection of AnimalTFDB (Zhang et al. 2012) and TcoF (Schaefer et al. 2011) lists of TFs minus CTCF, GTF2I and GTF2IRD1 that are not considered as putative core TFs (Table S2).

#### *Motif analysis*

A database of DNA sequence motifs for 695 TFs - about 60% of known TFs in vertebrates - was compiled from the TRANSFAC database of motifs (Matys et al. 2006), and from the MEME suite (January 23rd 2014 update), for the following collections: JASPAR CORE 2014 vertebrates (Mathelier et al. 2014), Jolma 2013 (Jolma et al. 2013), Homeodomains (Berger et al. 2008), mouse UniPROBE (Robasky and Bulyk 2011) and mouse and human ETS factors (Wei et al. 2010). For SE-assigned TFs with

identified sequence specific binding motifs, those motifs are used to search the SE sequences assigned to the gene encoding that TF. For the motif search, the search space in SEs is restricted to extended SE constituents, as these are the regions that capture most of the TF binding in SEs (Figure 1C). SE constituent DNA sequences are extracted, extended on each side (500 bp by default) and used for motif search with FIMO (Grant et al. 2011) with p-value threshold of  $1e^{-4}$  and a set of background sequences generated from the set of extended constituent sequences with fasta-get-markov.

#### *Identification of fully interconnected auto-regulatory loops*

SE-assigned TFs whose set of constituents contains at least 3 DNA sequence motif instances for their own protein products are defined as autoregulated TFs. If multiple motifs for the same TF matched an identical location, it is counted as only one motif instance. From the set of autoregulated TFs, the TFs predicted to bind to the SEs of other autoregulated TFs, using the same criteria as described above, are identified and all possible fully interconnected autoregulatory loops of TFs are then reconstructed through recursive identification. When multiple possibilities of fully interconnected autoregulatory loops are identified, the most representative fully interconnected autoregulatory loop of TFs is selected as the model of CRC. This loop is defined as the loop containing the TFs that occur the most frequently across all possible loops.

#### **Metagenes**

Genome-wide meta-representations of ChIP-seq density (in units of reads per million per base pair) were created by mapping aligned reads to SE constituents +/- 5kb using bamToGFF (<https://github.com/bradnerComputation/pipeline/blob/master/bamToGFF.py>) (Lin et al. 2012).

### **Transcription factor binding analysis**

H1 hESC ChIP-seq data (Kunarso et al. 2010; Hawkins et al. 2011) were used to quantify the binding of TFs to the region  $\pm$  1kb around cognate motifs found in SE constituents which are extended 500 bp on each side, or, as a control, in the same number of randomly selected genomic regions of the same size. The number of sequences containing motifs that overlapped with the ChIP-seq peaks identified by MACS 1.4.2 (Zhang et al. 2008) ran with parameter `-p 1e-9 keep-dup=auto -w -S -space=50` were quantified. The true positive rates of TF binding was calculated by dividing the number of motif containing sequences that were bound by the TF from the ChIP-seq data analysis, over the total number of motif containing sequences.

### **Gene set enrichment analysis (GSEA)**

GSEA (Mootha et al., 2003) analyses were performed using the tool available at <http://www.broadinstitute.org/gsea/>. Mean z-scores for either OCT4-GFP protein level reduction or cell nuclei count reduction (Chia et al. 2010) were used to rank the lists of all TFs and H1 hESC candidate core TFs were used as the query. The Pre-Ranked function of the GSEA software was used with 1000 iterations to generate the plots.

### **CRC target gene analysis**

For the CRC target gene analysis, two groups of target genes were considered: expressed genes and SE-assigned genes. Expressed genes correspond to the top 2/3 genes ranked based on H3K27ac signal in the region  $\pm$ 1kb around the TSS. SE-assigned genes were identified from the list of expressed genes as described above.

For H1, in each group, genes that had motif instances predicting the binding of at least 5, 6, 7, 8, 9 or 10 candidate core TFs in their combined enhancer and promoter sequences were quantified. For other cell types, genes that had motif instances predicting the binding of at least half or all candidate core TFs in their combined enhancer and promoter sequences were quantified. The region  $\pm 1$ kb around the TSS and associated super or typical enhancer constituents extended 500 bp on each side were used for the motif search when all expressed genes were considered, and SE constituents extended 500 bp on each side and corresponding region  $\pm 1$ kb around the TSS sequence of the SE-assigned gene were used for the motif search when SE assigned genes were considered. For the maps in Figure 3, 30 target genes selected from the CRC targets are displayed as examples. These were selected based on the number of Pubmed literature entries for each target gene associated to search terms relative to the cell type in which it was identified.

### **ChIP-seq tracks**

Sequence reads were aligned to the hg19 version of the human genome using Bowtie (Langmead et al. 2009) with parameters -k1 -m1 --best. Wiggle tracks were created from ChIP-seq data with MACS 1.4.2 (Zhang et al. 2008) with parameters -p 1e-9 keep-dup=auto -w -S -space=50, normalized to the total number of mapped reads in the sample, and visualized in UCSC Genome Browser.

### **ChIP-seq**

Chromatin immunoprecipitation experiments were performed in Jurkat cells (ATCC), as described (Kwiatkowski et al. 2014), with the following antibodies: anti-H3K27ac (ab4729, Abcam), anti-RUNX1 (ab23980, Abcam) and anti-GATA3 (Sc-22206X, Santa

Cruz). Purified immunoprecipitated DNA was prepared for sequencing according to a modified version of the Solexa Genomic DNA protocol, and sequenced with an Illumina HiSeq sequencer.

### **Microarray expression analysis**

Microarray data displayed on Figure 5 were downloaded from GEO (references in Table S1). Expression values were processed using MAS5 normalization from the “affy” R package (Gautier et al. 2004). Signals for probes corresponding to the same transcript were aggregated using the standard probe assignment method (hgu133plus2cdf). Normalized  $\log_2(\text{expression}+1)$  of the transcripts for the set of candidate core TFs or for all TFs considered expressed with the metric described above, are displayed for each sample. P-values were calculated using a Wilcoxon test. Affymetrix HG U133 2.0 plus microarray data performed in Jurkat cells after knock-down of either MYB, RUNX1, TAL1 and GATA3 with shRNAs were downloaded from Sanda et al., 2011. Mean of log 2 fold-change (knock-down/control) for two biological replicates using two target shRNAs per TF and two shRNAs control were extracted for either the set of Jurkat cell candidate core TFs represented on Figure 4A or for the full set of TFs considered expressed in Jurkat cells.

### **DNA-binding domain structure analysis**

Candidate core TFs for all samples, and the compiled list of housekeeping TFs (Ramsköld et al. 2009) considered expressed in at least one of the samples, were overlapped with lists of TFs classified by DNA-binding domains (Vaquerizas et al. 2009). Percentages of DNA-binding domain containing TFs were compared between candidate core TFs and housekeeping TFs for each type of DNA-binding domain. Percentages of

TFs that were significantly different between the two groups of TFs are displayed (z-test  $p\text{-value} < 5e^{-2}$ ).

### **Hierarchical clustering of CRCs**

A matrix of distances was calculated based on Pearson correlations between the candidate core TFs lists and plotted using R. For this analysis, we required the samples had greater than 7 TFs in their CRC for improved robustness of clustering.

### **Disease or trait-associated gene analysis**

Disease or trait-associated gene lists were downloaded from the NHGRI catalog of published Genome-Wide Association Studies (12/5/15 update). The disease or trait-associated genes overlapping with the list of core or non-core TFs were quantified. For each disease or trait, the proportion of the overlapping candidate core TFs and non-core TFs were compared with a z-test. The disease or traits for which z-test  $p\text{-value} < 5e^{-2}$ , are displayed and  $-\log(p\text{-values})$  values are plotted on the radar plot.

### **Comparison of networks**

For the set of TFs in the CRC that are represented in the transcriptional network for a corresponding cell type (Neph et al. 2012), we extracted the set of TF-TF interactions predicted in the CRC, where interactions are defined as predicted TF binding to the regulatory sequences of another TF. We then computed the number of TF-TF interactions predicted in the CRC which are also predicted in the transcriptional network for a corresponding cell type (Neph et al. 2012). As a control, we did the same analysis, for each sample, using a set of the same number of randomly selected TFs that are not part of the CRC, but that are represented in the network for a corresponding cell type

(Neph et al. 2012). We then compared the percentage of overlap obtained for the CRC set of interactions, with the percentage of overlap obtained for the control set of interactions, with a z-test.

### Supplemental Figure Legends

**Figure S1.** Example of CRC model selection out of multiple CRCs. The TF content of each possible Interconnected autoregulatory loop (IAL) in H1 hESC is plotted in each column. The TFs were ranked vertically by decreasing fraction of their occurrences across all the possible IALs. The loops are ranked from left to right by average fraction of TF occurrence in the loops. The CRC model corresponds to the leftmost loop.

**Figure S2.** Effect of H1 hES candidate core TF depletion on pluripotency and proliferation. (A) Rank of each candidate core TF among all TFs for mean of z-score for OCT4-GFP fluorescence reduction and nuclei number reduction from 2 experimental replicates, from siRNA screen data in H1 hES (Chia et al. 2010). (B) Gene-Set Enrichment Analysis (GSEA) for the candidate core TFs compared to all TFs for *POU5F1/OCT4-GFP* expression values. (C) GSEA analysis for the candidate core TFs compared to all TFs for nuclei number values.

**Figure S3.** ChIP-seq data for TFs in the CRC support the predicted binding interactions for 3 additional cell types. ChIP-seq data showing binding of the TFs to the SEs of the candidate core TF for (A) CD20+ B-cell, (B) HCT-116 colon cancer cell line, and (C) MCF-7 breast cancer cell line. Red lines on top of the tracks depict SE genomic locations.

**Figure S4.** TF associated with the indicated diseases through GWAS in the CD20+ B-cell CRC model. Genes associated with a given disease through GWAS are colored according to the key. SEs that overlap SNPs associated with a given disease or trait through GWAS are colored according to the key.

Figure S1

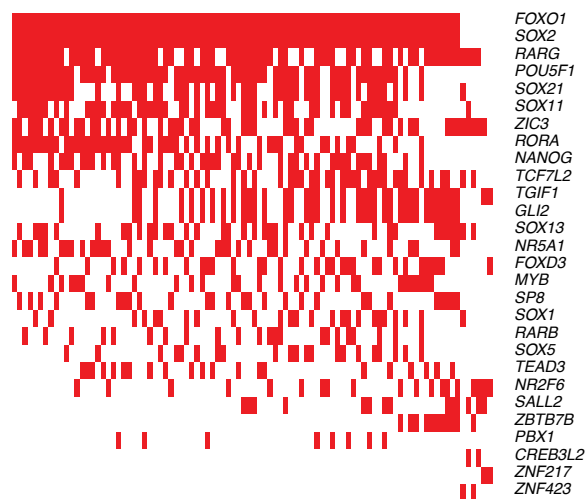

Figure S2

**A**

| OCT4-GFP fluorescence changes        |    | Nuclei number changes               |    |
|--------------------------------------|----|-------------------------------------|----|
| Rank for mean of z-scores (% of TFs) |    | Rank for mean of z-score (% of TFs) |    |
| POU5F1                               | 0  | NR5A1                               | 4  |
| ZIC3                                 | 5  | POU5F1                              | 9  |
| NANOG                                | 5  | NANOG                               | 11 |
| RARG                                 | 27 | SOX21                               | 19 |
| SOX2                                 | 34 | ZIC3                                | 22 |
| MYB                                  | 39 | SOX2                                | 24 |
| NR5A1                                | 64 | RARG                                | 31 |
| FOXO1                                | 83 | RORA                                | 33 |
| RORA                                 | 86 | FOXO1                               | 38 |
| SOX21                                | 89 | MYB                                 | 66 |

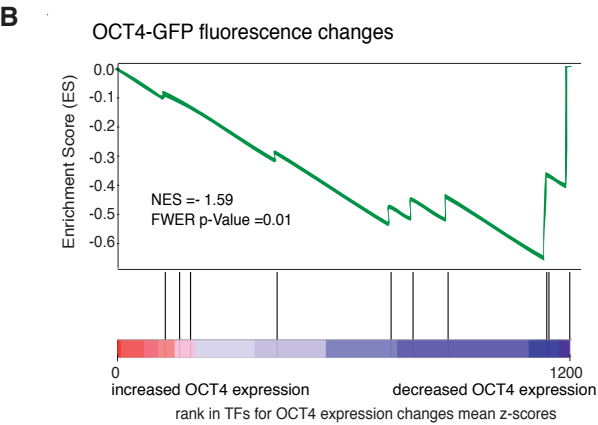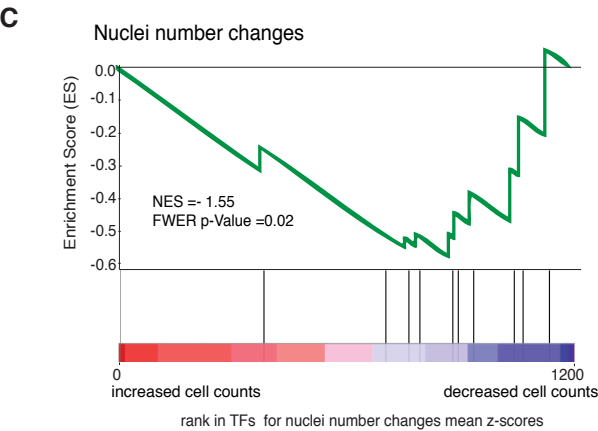

Figure S3

A

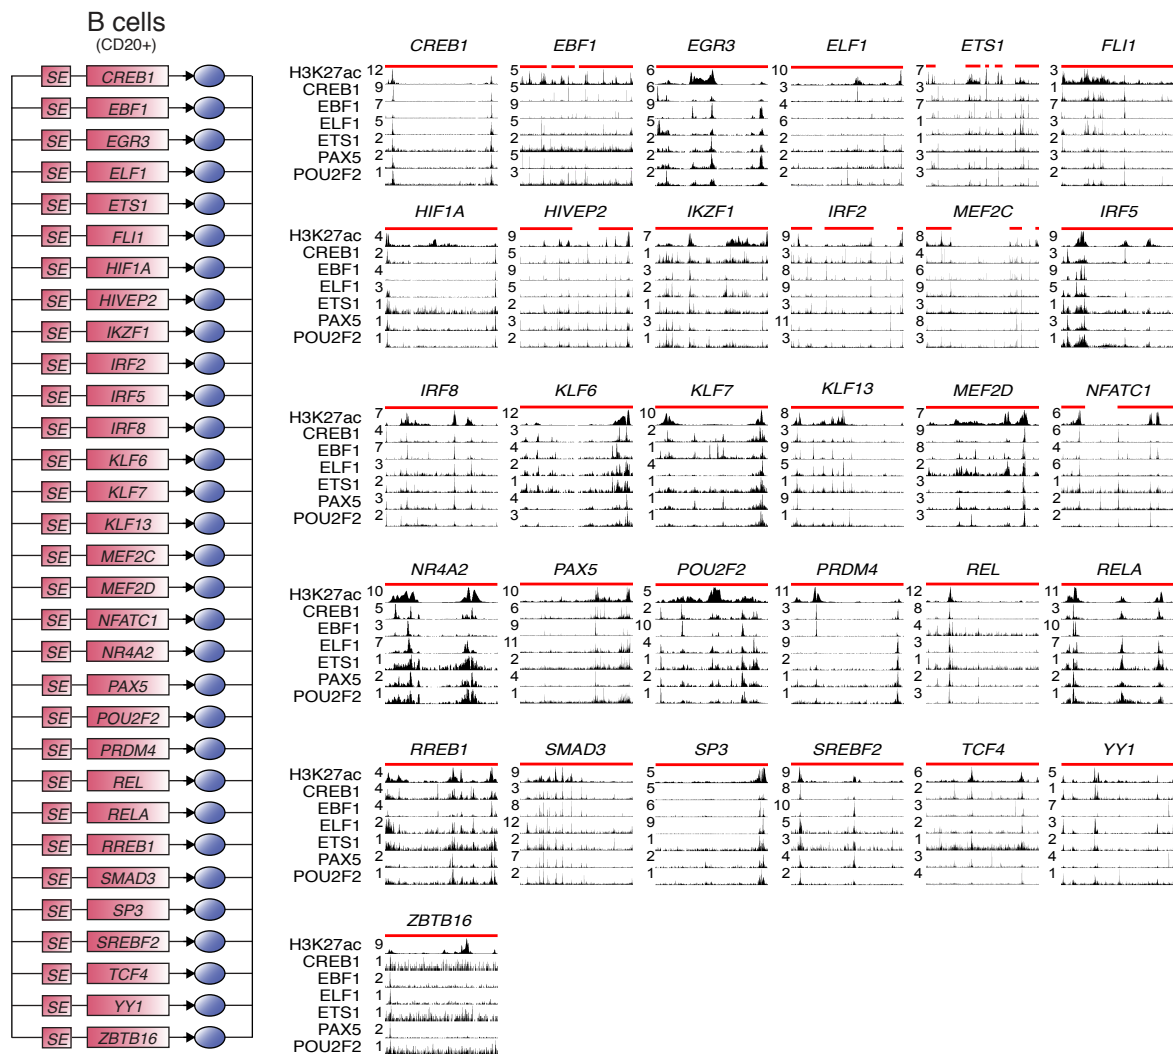

B

**Colorectal Cancer (HCT116)**

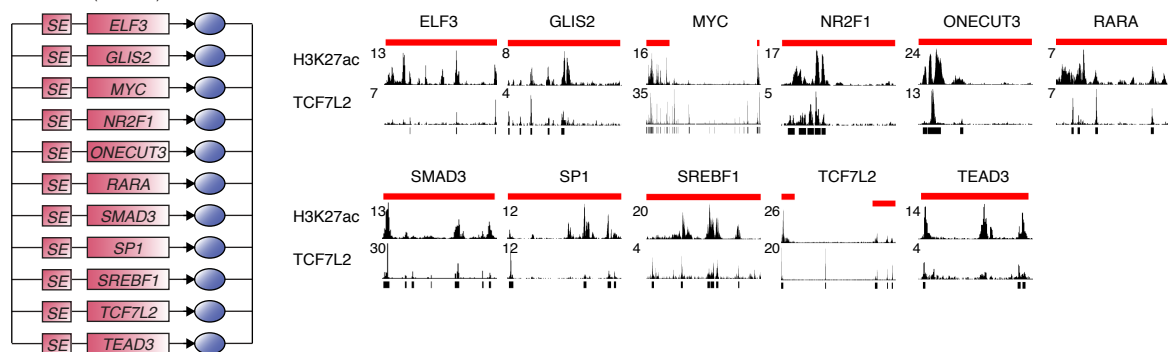

C

**Breast Cancer (MCF7)**

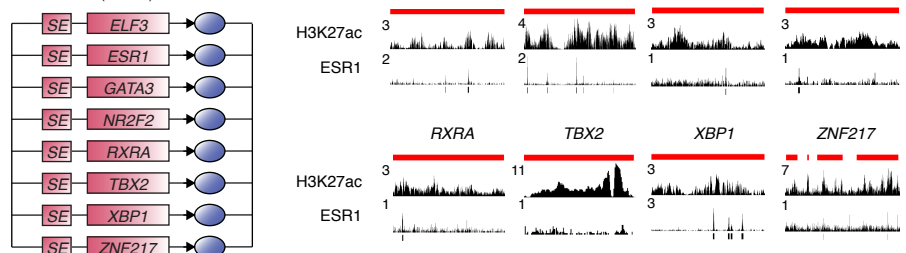

Figure S4

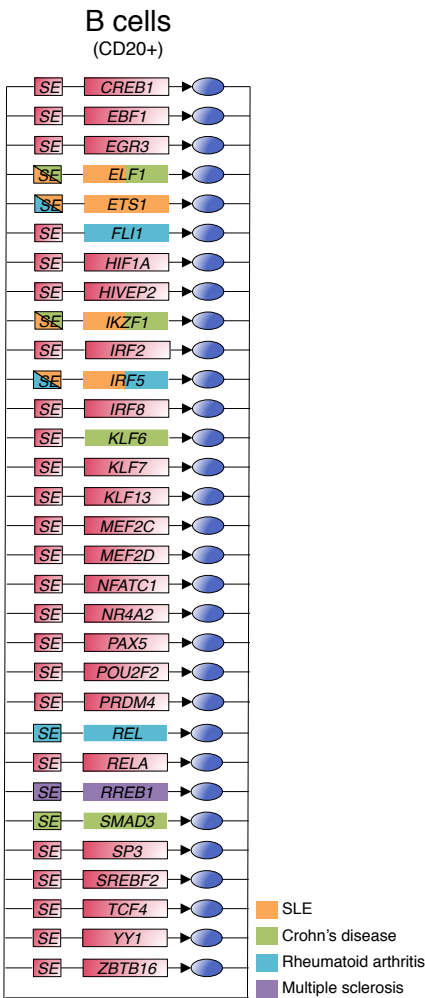

## Supplemental Tables

**Table S1.** List of samples and GEO accession numbers for the ChIP-seq and expression datasets.

**Table S2.** List of TFs and associated motifs.

**Table S3.** Lists of SE-assigned TFs, autoregulated TFs, CRC models and extended regulatory circuitry for 84 samples.

**Table S4:** List of H1 CRC SE-assigned target genes whose expression is modified after POU5F1/OCT4 knock-down in H1 hESCs.

**Table S5.** H1 CRC SE-assigned target gene examples.

**Table S6.** Results for MIR371 target genes for TargetScan, miRDB and PITA miRNA target predictor software.

**Table S7.** Functions of the candidate core TFs for five well-studied cell types.

**Table S8.** Comparison of CRC models with Neph et al. networks.

**Table S5.** H1 CRC SE-assigned target gene examples

| Targets                      |                                                                                                                                                                                                                                                     | Role in ESC biology | References                                                                                                      |
|------------------------------|-----------------------------------------------------------------------------------------------------------------------------------------------------------------------------------------------------------------------------------------------------|---------------------|-----------------------------------------------------------------------------------------------------------------|
| <b>Transcription factors</b> |                                                                                                                                                                                                                                                     |                     |                                                                                                                 |
| GLI2                         | Involved in mESC self-renewal.                                                                                                                                                                                                                      |                     | Li et al., 2013                                                                                                 |
| PBX1                         | Required for the maintenance of hESC identity.                                                                                                                                                                                                      |                     | Chan et al., 2009                                                                                               |
| PRDM14                       | Required for the maintenance of hESC identity.                                                                                                                                                                                                      |                     | Chia et al., 2010                                                                                               |
| SALL4                        | Required for the maintenance of mESC identity.                                                                                                                                                                                                      |                     | Zhang et al., 2006                                                                                              |
| ZNF281/ZFP281                | Required for proper differentiation in mESCs.                                                                                                                                                                                                       |                     | Seo et al., 2013; Wang et al., 2008; Fidalgo et al., 2011; Fidalgo et al., 2012                                 |
| ZSCAN10/ZFP206               | Required to maintain pluripotency and for differentiation in mESC.                                                                                                                                                                                  |                     | Yu et al., 2009                                                                                                 |
| <b>miRNA machinery</b>       |                                                                                                                                                                                                                                                     |                     |                                                                                                                 |
| LIN28B                       | RNA binding protein. Represses let-7 miRNA expression, tightly regulated during differentiation. Can be used to reprogram fibroblasts into iPSCs. May directly promote the translation of various cell cycle regulators.                            |                     | Viswanathan et al., 2010; Hagan et al., 2009; Melton et al., 2010; Yu and Thomson et al., 2007; Xu et al., 2009 |
| MIR371                       | Human homolog of murine mir290, the most abundant miRNA in mESCs, essential for their survival. Functional assays in human cancer cells support reciprocal expression regulation of MIR371 and SOX2, which is a highly predicted target of miR-371. |                     | Medeiros et al., 2011; Calabrese et al., 2007; Sinkkonen et al., 2008; Marson et al., 2008                      |
| TRIM71/mLin41                | miRISC-interacting protein. Promotes ESC self-renewal by facilitating the G1-S transition. Target of let-7 mi-RNA.                                                                                                                                  |                     | Chang et al., 2012                                                                                              |
| <b>chromatin regulators</b>  |                                                                                                                                                                                                                                                     |                     |                                                                                                                 |
| DNMT3B                       | DNA methyltransferase required at the ESC differentiation step to silence <i>POU5F1</i> and <i>NANOG</i> gene expression.                                                                                                                           |                     | Jackson et al., 2004; Feldman et al., 2006                                                                      |
| DPPA4                        | Chromatin binding protein involved in ESC self-renewal.                                                                                                                                                                                             |                     | Ivanova et al., 2010                                                                                            |
| JARID2                       | Polycom (PcG) protein. Helps silence genes encoding key regulators of development, yet allowing them to remain in a “poised” state for activation.                                                                                                  |                     | Bernstein et al., 2006; Lee et al., 2006, Young et al. 2011; Das et al., 2014                                   |
| KDM2B                        | H3K36me2 demethylase. Promotes recruitment of the PcG proteins to establish a poised chromatin state on genes encoding key regulators of development.                                                                                               |                     | He et al., 2013                                                                                                 |
| SETDB1                       | H3K9me3 methylase. Promotes recruitment of the PcG proteins to establish a poised chromatin state on genes encoding key regulators of development.                                                                                                  |                     | Bilodeau et al., 2009; Yeap et al., 2009; Yuan et al., 2009; Kagey et al., 2010                                 |
| <b>long ncRNA</b>            |                                                                                                                                                                                                                                                     |                     |                                                                                                                 |
| MALAT1                       | Promotes cellular proliferation by modulating the expression and pre-mRNA processing of cell cycle-regulated transcription factors in various cancer cells.                                                                                         |                     | Tripathi et al., 2010; Tripathi et al., 2013; Li et al., 2009; Gutschner et al., 2012                           |

**Table S7.** Functions of the candidate core TFs for five well-studied cell types

| TF                            | Role in cell identity                                                                     | References                                                                                          |
|-------------------------------|-------------------------------------------------------------------------------------------|-----------------------------------------------------------------------------------------------------|
| <b>B-cell (CD20+)</b>         |                                                                                           |                                                                                                     |
| CREB1                         | Involved in B cell activation and proliferation via the B cell receptor signaling pathway | Yasuda et al., 2008; Blois et al., 2004                                                             |
| EBF1                          | Required for normal B cell differentiation                                                | Lin and Grosschedl, 1995                                                                            |
| EGR3                          | Required with EGR2 for antigen receptor-induced proliferation                             | Li et al., 2012                                                                                     |
| ELF1                          | Regulates production of diverse lymphocyte repertoire                                     | Grant et al., 1995; Akbarali et al., 1996; Ernst et al., 1996                                       |
| ETS1                          | Required for normal B and T cell differentiation                                          | Bories et al., 1995; Eyquem et al., 2004a; Eyquem et al., 2004b; Andersson et al., 1999             |
| FLI1                          | Required for expression of B cell receptor                                                | Maier et al., 2003; Bradshaw et al., 2008; Zhang et al., 2008                                       |
| HIF1A                         | Required for normal B cell differentiation                                                | Kojima et al., 2002                                                                                 |
| HIVEP2                        | Involved in regulation of MHC class I genes                                               | van't Veer et al., 1992                                                                             |
| IKZF1                         | Involved in B and T cell differentiation                                                  | Georgopoulos et al., 1994; Wang et al., 1996                                                        |
| IRF2                          | Regulates proliferation and antibody production                                           | Matsuyama et al., 1993; Minamino et al., 2012                                                       |
| IRF5                          | Required for normal B cell differentiation                                                | Lien et al., 2010                                                                                   |
| IRF8                          | Required for normal B cell differentiation                                                | Lu et al., 2003; Ma et al., 2006; Wang et al., 2008                                                 |
| KLF13                         | Required for normal B cell differentiation                                                | Outram et al., 2008; Gordon et al., 2008                                                            |
| KLF6                          |                                                                                           |                                                                                                     |
| KLF7                          |                                                                                           |                                                                                                     |
| MEF2C                         | Regulates proliferation and antibody production                                           | Rao et al., 1998; Swanson et al., 1998; Wilker et al., 2008; Khiem et al., 2008; Gekas et al., 2009 |
| MEF2D                         |                                                                                           |                                                                                                     |
| NFATC1                        | Required for normal B cell differentiation                                                | Peng et al., 2001; Berland and Wortis, 2003; Bhattacharyya et al., 2011                             |
| NR4A2                         | Regulates immune homeostasis                                                              | Sekiya et al., 2011; Sekiya et al., 2013                                                            |
| PAX5                          | Required for normal B cell differentiation                                                | Urbanek et al., 1994; Nutt et al., 1999                                                             |
| POU2F2                        | Required for normal B cell differentiation                                                | Corcoran et al., 1993                                                                               |
| PRDM4                         |                                                                                           |                                                                                                     |
| REL                           | Regulates proliferation and survival in response to activation                            | Kontgen et al., 1995; Harling-McNabb et al., 1999; Tumang et al., 2002)                             |
| RELA                          | Required for proliferation of developing B cells                                          | Prendes et al., 2003                                                                                |
| RREB1                         |                                                                                           |                                                                                                     |
| SMAD3                         | Regulates antibody production                                                             | Stavnezer and Kang, 2009; Coffman et al., 1989; Sonoda et al. 1989                                  |
| SP3                           | Required for normal hematopoiesis                                                         | van Loo et al., 2003                                                                                |
| SREBF2                        |                                                                                           |                                                                                                     |
| TCF4/E2-2                     | Required for normal B cell differentiation                                                | Zhuang et al., 1996                                                                                 |
| YY1                           | Required for normal antibody production                                                   | Liu et al., 2007; Green et al., 2011; Pan et al., 2013                                              |
| ZBTB16                        | Required for normal hematopoiesis                                                         | Savage et al., 2008; Kovalovsky et al., 2008; Raberger et al., 2008                                 |
| <b>Heart (Left Ventricle)</b> |                                                                                           |                                                                                                     |
| ETS1                          | Required for normal heart development                                                     | Gao et al., 2010; Ye et al., 2010; Lie-                                                             |

|                 |                                                            |                                                                                                                                                                                                                                                 |
|-----------------|------------------------------------------------------------|-------------------------------------------------------------------------------------------------------------------------------------------------------------------------------------------------------------------------------------------------|
|                 |                                                            | Venema et al., 2003                                                                                                                                                                                                                             |
| FOXK1           | Regulates cardiac and skeletal myogenic progenitors        | Shi et al., 2012                                                                                                                                                                                                                                |
| FOXO3           | Regulates cardiac hypertrophy                              | Skurk et al., 2005; Sengupta et al., 2009; Sengupta et al., 2011; Schips et al., 2011                                                                                                                                                           |
| IRF1            | Regulates cardiac hypertrophy                              | Jiang et al., 2014                                                                                                                                                                                                                              |
| KLF13           | Required for normal heart development                      | Lavallee et al., 2006                                                                                                                                                                                                                           |
| KLF15           | Pleiotropic regulator of cardiac function and metabolism   | Fisch et al., 2007; Noack et al., 2012; Prosdocimo et al., 2014; Jeyaraj et al., 2012; Leenders et al., 2010;                                                                                                                                   |
| KLF7            |                                                            |                                                                                                                                                                                                                                                 |
| MEIS1           | Required for normal heart development                      | Stankunas et al., 2008; Mahmoud et al., 2013                                                                                                                                                                                                    |
| NKX2-5          | Required for normal heart development                      | Lyons et al., 1995; Komuro and Izumo, 1993; Lints et al., 1993                                                                                                                                                                                  |
| NR2F2           | Required for normal heart development                      | Pereira et al., 1999; Al Turki et al., 2014                                                                                                                                                                                                     |
| NR4A1           | Regulates cardiac hypertrophy and apoptosis                | Wang et al., 2009; Cheng et al., 2011; Wang et al., 2013                                                                                                                                                                                        |
| PBX1            | Required for normal heart development                      | Stankunas et al., 2008; Chang et al., 2008; Arrington et al., 2012                                                                                                                                                                              |
| RARA            | Contributes to normal heart development                    | Kastner et al., 1997; Lee et al., 1997; Luo et al., 1996; Mendelsohn et al., 1994                                                                                                                                                               |
| RARB            | Contributes to normal heart development                    | Luo et al., 1996                                                                                                                                                                                                                                |
| RREB1           |                                                            |                                                                                                                                                                                                                                                 |
| RXRA            | Contributes to normal heart development                    | Kastner et al., 1997; Sucov et al., 1994; Gruber et al., 1996; Kastner et al., 1994                                                                                                                                                             |
| SMAD3           | Regulates antibody production                              | Stavnezer and Kang, 2009; Coffman et al., 1989; Sonoda et al. 1989                                                                                                                                                                              |
| SOX18           | Required for normal heart development                      | Zhang et al., 2005; Sakamoto et al., 2007; Stennard et al., 2003; Reim et al., 2005; Singh et al., 2005; Stennard et al., 2005; Takeuchi et al., 2005; Cai et al., 2005; Qian et al., 2005; Miskolczi-McCallum et al., 2005; Brown et al., 2005 |
| TBX20           | Required for normal heart development                      | Li et al., 1997; Basson et al., 1997; Ieda et al., 2010; Nam et al., 2014; Song et al., 2012                                                                                                                                                    |
| TBX5            | Required for normal heart development                      | Wang et al., 2010                                                                                                                                                                                                                               |
| TEF             | Contributes to normal heart function                       | Forrest and Vennstrom, 2000; Fraichard et al., 1997; Gauthier et al., 2001; Gauthier et al., 1999; Kahaly et al., 2002                                                                                                                          |
| THRA            | Contributes to normal heart function                       |                                                                                                                                                                                                                                                 |
| <hr/>           |                                                            |                                                                                                                                                                                                                                                 |
| <b>Pancreas</b> |                                                            |                                                                                                                                                                                                                                                 |
| BHLHE41         |                                                            |                                                                                                                                                                                                                                                 |
| HES1            | Required for normal pancreas development                   | Jensen et al., 2000; Kageyama et al., 2000                                                                                                                                                                                                      |
| KLF13           |                                                            |                                                                                                                                                                                                                                                 |
| NR2F6           |                                                            |                                                                                                                                                                                                                                                 |
| NR4A1           | Required for beta-cell proliferation and insulin secretion | Briand et al., 2012; Tessem et al., 2014                                                                                                                                                                                                        |
| PDX1            | Required for normal pancreas development                   | Jonsson et al., 1994; Horb et al., 2003; Zhou et al., 2008                                                                                                                                                                                      |
| PKNOX2          |                                                            |                                                                                                                                                                                                                                                 |

|       |                                          |                                                                                     |
|-------|------------------------------------------|-------------------------------------------------------------------------------------|
| RARA  | Required for normal pancreas development | Chen et al., 2004; Ostrom et al., 2008; Matthews et al., 2004; Chertow et al., 1987 |
| RREB1 |                                          |                                                                                     |
| RXRA  | Required for normal pancreas development | Chen et al., 2004; Ostrom et al., 2008; Matthews et al., 2004; Chertow et al., 1987 |
| SMAD3 | Required for normal pancreas development | Wandzioch and Zaret, 2009; Lin et al., 2009; El-Gohary et al., 2013                 |
| SOX13 |                                          |                                                                                     |
| TEF   |                                          |                                                                                     |

---

#### Adipocytes (Adipose Nuclei)

|         |                                                                 |                                                                                                                           |
|---------|-----------------------------------------------------------------|---------------------------------------------------------------------------------------------------------------------------|
| CREB3L2 |                                                                 |                                                                                                                           |
| EBF1    | Required for normal adipocyte differentiation                   | Akerblad et al., 2002                                                                                                     |
| ELK3    |                                                                 |                                                                                                                           |
| ETS1    |                                                                 |                                                                                                                           |
| FLI1    |                                                                 |                                                                                                                           |
| FOXO1   | Regulates normal adipocyte differentiation                      | Nakae et al., 2003                                                                                                        |
| HBP1    |                                                                 |                                                                                                                           |
| IRF1    |                                                                 |                                                                                                                           |
| KLF11   | Contributes to regulation of lipid metabolism                   | Zhang et al., 2013; Yamamoto et al., 2010                                                                                 |
| MEF2D   | Contributes to regulation of glucose metabolism                 | Sparling et al., 2007                                                                                                     |
| NFIA    | Required for normal adipocyte differentiation                   | Waki et al., 2011                                                                                                         |
| NR2F2   | Regulates normal adipocyte differentiation                      | Xu et al., 2008;                                                                                                          |
| NR3C1   | Regulates normal adipocyte differentiation and lipid metabolism | Chapman et al., 1985; Hauner et al., 1987                                                                                 |
| PBX1    | Regulates normal adipocyte differentiation                      | Monteiro et al., 2011                                                                                                     |
| PPARG   | Required for normal adipocyte differentiation                   | Tontonoz et al., 1994                                                                                                     |
| RARA    | Regulates normal adipocyte differentiation                      | Murray and Russell, 1980; Kuri-Harcuch, 1982; Castro-Munozledo et al., 1987; Stone and Bernlohr, 1990; Kamei et al., 1994 |
| RFX2    |                                                                 |                                                                                                                           |
| RREB1   |                                                                 |                                                                                                                           |
| RUNX1   |                                                                 |                                                                                                                           |
| RXRA    | Regulates normal adipocyte differentiation                      | Murray and Russell, 1980; Kuri-Harcuch, 1982; Castro-Munozledo et al., 1987; Stone and Bernlohr, 1990; Kamei et al., 1994 |
| SMAD3   | Regulates normal adipocyte differentiation                      | Choy et al., 2000; Choy and Derynck, 2003; Epperly et al., 2005                                                           |
| STAT3   | Required for normal adipocyte differentiation                   | Wang et al., 2009; Zhang et al. 2011; Derecka et al., 2012                                                                |
| STAT5B  | Regulates normal adipocyte differentiation                      | Nanbu-Wakao et al., 2002; Floyd and Stephens, 2003                                                                        |
| TCF7L2  | Regulates normal adipocyte differentiation                      | Ross et al., 2000                                                                                                         |
| ZNF217  |                                                                 |                                                                                                                           |

---

#### Brain (Hippocampus Middle)

|       |                                                        |                                                                      |
|-------|--------------------------------------------------------|----------------------------------------------------------------------|
| ATF1  |                                                        |                                                                      |
| ERF   | Required for normal neuronal differentiation           | Janesick et al., 2013                                                |
| IRF1  | Regulates response to cerebral inflammation and damage | Jarosinski and Massa, 2002; Iadecola et al., 1999; Park et al., 1998 |
| IRF2  | Regulates response to cerebral inflammation and damage | Park et al., 1998                                                    |
| KLF13 |                                                        |                                                                      |

|        |                                                                                                                                                   |                                                                                                                               |
|--------|---------------------------------------------------------------------------------------------------------------------------------------------------|-------------------------------------------------------------------------------------------------------------------------------|
| MEF2D  | Required for normal neuronal differentiation; regulates neuron plasticity; neuronal survival factor                                               | Flavell et al., 2006; Smith et al., 2006; Salma and McDermott, 2012; Chen et al., 2012; Gong et al., 2003                     |
| NKX6-2 | Neuronal survival factor; required for normal CNS development                                                                                     | Hashimoto et al., 2004; Southwood et al., 2004; Ma et al., 2013; Dichman and Harland, 2011;                                   |
| NR2F2  | Required for normal CNS development                                                                                                               | Kim et al., 2009; Tang et al., 2012; Naka et al., 2008; Kanatani et al., 2008; Tripodi et al., 2004                           |
| NR4A1  | Regulates synaptic function                                                                                                                       | Bridi and Abel, 2013; McNulty et al., 2012                                                                                    |
| POU3F3 | Contributes to normal CNS development                                                                                                             | Dominguez et al., 2013; Sugitani et al., 2002                                                                                 |
| RARA   | Regulates synaptic function; contributes to normal neuronal differentiation; contributes to normal memory function                                | Nomoto et al., 2012; Chen and Napoli, 2008; Aoto et al., 2008                                                                 |
| RXRA   | Regulates synaptic function; contributes to normal neuronal differentiation; contributes to normal memory function                                | Nomoto et al., 2012; Chen and Napoli, 2008; Aoto et al., 2008                                                                 |
| SOX13  | Contributes to normal neuronal differentiation                                                                                                    | Pla et al., 2008                                                                                                              |
| SOX2   | Required for normal neuronal differentiation; mutations associated with hippocampal malformations; required for maintenance of neural progenitors | Ferri et al., 2004; Graham et al., 2003; Sisodiya et al., 2006; ; Lujan et al., 2012                                          |
| SOX8   | Required for normal oligodendrocyte differentiation                                                                                               | Stolt et al., 2004; Stolt et al., 2005                                                                                        |
| SREBF1 | Regulates fatty acid homeostasis during neuronal differentiation                                                                                  | Tabernero et al., 2001; Pai et al., 1998; Velasco et al., 2003                                                                |
| TCF4   | Required for normal neuronal differentiation; mutations associated with neurological disorders                                                    | Flora et al., 2007; Fu et al., 2009; Brockschmidt et al., 2007; Zweier et al., 2007; Amiel et al., 2007; Brzozka et al., 2010 |
| TEF    | Component of circadian clock; mutations associated with neurological disorders                                                                    | Gachon et al., 2004; Hua et al., 2012a; Hua et al., 2012b                                                                     |
| ZBTB16 | Required for normal neuronal differentiation                                                                                                      | Gaber et al. 2013; Sobieszczuk et al., 2010                                                                                   |

## References

- Akbarali Y, Oettgen P, Boltax J, Libermann TA. 1996. ELF-1 interacts with and transactivates the IgH enhancer pi site. *J Biol Chem* **271**: 26007–12.
- Akerblad P, Lind U, Liberg D, Bamberg K, Sigvardsson M. 2002. Early B-cell factor (O/E-1) is a promoter of adipogenesis and involved in control of genes important for terminal adipocyte differentiation. *Mol Cell Biol* **22**: 8015–25.
- Al Turki S, Manickaraj AK, Mercer CL, Gerety SS, Hitz M-P, Lindsay S, D'Alessandro LCA, Swaminathan GJ, Bentham J, Arndt A-K, et al. 2014. Rare variants in NR2F2 cause congenital heart defects in humans. *Am J Hum Genet* **94**: 574–85.
- Amiel J, Rio M, de Pontual L, Redon R, Malan V, Boddaert N, Plouin P, Carter NP, Lyonnet S, Munnich A, et al. 2007. Mutations in TCF4, encoding a class I basic helix-loop-helix transcription factor, are responsible for Pitt-Hopkins syndrome, a severe epileptic encephalopathy associated with autonomic dysfunction. *Am J Hum Genet* **80**: 988–93.
- Aoto J, Nam CI, Poon MM, Ting P, Chen L. 2008. Synaptic signaling by all-trans retinoic acid in homeostatic synaptic plasticity. *Neuron* **60**: 308–20.
- Arrington CB, Dowse BR, Bleyl SB, Bowles NE. 2012. Non-synonymous variants in pre-B cell leukemia homeobox (PBX) genes are associated with congenital heart defects. *Eur J Med Genet* **55**: 235–7.
- Basson CT, Bachinsky DR, Lin RC, Levi T, Elkins JA, Soultis J, Grayzel D, Kroumpouzou E, Traill TA, Leblanc-Straceski J, et al. 1997. Mutations in human TBX5 [corrected] cause limb and cardiac malformation in Holt-Oram syndrome. *Nat Genet* **15**: 30–5.
- Berger MF, Badis G, Gehrke AR, Talukder S, Philippakis AA, Peña-Castillo L, Alleyne TM, Mnaimneh S, Botvinnik OB, Chan ET, et al. 2008. Variation in homeodomain DNA binding revealed by high-resolution analysis of sequence preferences. *Cell* **133**: 1266–76.
- Berland R, Wortis HH. 2003. Normal B-1a cell development requires B cell-intrinsic NFATc1 activity. *Proc Natl Acad Sci U S A* **100**: 13459–64.
- Bernstein BE, Mikkelsen TS, Xie X, Kamal M, Huebert DJ, Cuff J, Fry B, Meissner A, Wernig M, Plath K, et al. 2006. A bivalent chromatin structure marks key developmental genes in embryonic stem cells. *Cell* **125**: 315–26.
- Bhattacharyya S, Deb J, Patra AK, Thuy Pham DA, Chen W, Vaeth M, Berberich-Siebelt F, Klein-Hessling S, Lamperti ED, Reifenberg K, et al. 2011. NFATc1 affects mouse splenic B cell function by controlling the calcineurin--NFAT signaling network. *J Exp Med* **208**: 823–39.

- Bilodeau S, Kagey MH, Frampton GM, Rahl PB, Young RA. 2009. SetDB1 contributes to repression of genes encoding developmental regulators and maintenance of ES cell state. *Genes Dev* **23**: 2484–9.
- Blois JT, Mataraza JM, Mecklenbraüker I, Tarakhovsky A, Chiles TC. 2004. B cell receptor-induced cAMP-response element-binding protein activation in B lymphocytes requires novel protein kinase Cdelta. *J Biol Chem* **279**: 30123–32.
- Bories JC, Willerford DM, Grévin D, Davidson L, Camus A, Martin P, Stéhelin D, Alt FW. 1995. Increased T-cell apoptosis and terminal B-cell differentiation induced by inactivation of the Ets-1 proto-oncogene. *Nature* **377**: 635–8.
- Bradshaw S, Zheng WJ, Tsoi LC, Gilkeson G, Zhang XK. 2008. A role for Fli-1 in B cell proliferation: implications for SLE pathogenesis. *Clin Immunol* **129**: 19–30.
- Briand O, Helleboid-Chapman A, Ploton M, Hennuyer N, Carpentier R, Pattou F, Vandewalle B, Moerman E, Gmyr V, Kerr-Conte J, et al. 2012. The nuclear orphan receptor Nur77 is a lipotoxicity sensor regulating glucose-induced insulin secretion in pancreatic  $\beta$ -cells. *Mol Endocrinol* **26**: 399–413.
- Bridi MS, Abel T. 2013. The NR4A orphan nuclear receptors mediate transcription-dependent hippocampal synaptic plasticity. *Neurobiol Learn Mem* **105**: 151–8.
- Brockschmidt A, Todt U, Ryu S, Hoischen A, Landwehr C, Birnbaum S, Frenck W, Radlwimmer B, Lichter P, Engels H, et al. 2007. Severe mental retardation with breathing abnormalities (Pitt-Hopkins syndrome) is caused by haploinsufficiency of the neuronal bHLH transcription factor TCF4. *Hum Mol Genet* **16**: 1488–94.
- Brown DD, Martz SN, Binder O, Goetz SC, Price BMJ, Smith JC, Conlon FL. 2005. Tbx5 and Tbx20 act synergistically to control vertebrate heart morphogenesis. *Development* **132**: 553–63.
- Brzózka MM, Radyushkin K, Wichert SP, Ehrenreich H, Rossner MJ. 2010. Cognitive and sensorimotor gating impairments in transgenic mice overexpressing the schizophrenia susceptibility gene Tcf4 in the brain. *Biol Psychiatry* **68**: 33–40.
- Cai C-L, Zhou W, Yang L, Bu L, Qyang Y, Zhang X, Li X, Rosenfeld MG, Chen J, Evans S. 2005. T-box genes coordinate regional rates of proliferation and regional specification during cardiogenesis. *Development* **132**: 2475–87.
- Castro-Muñozledo F, Marsch-Moreno M, Beltrán-Langarica A, Kuri-Harcuch W. 1987. Commitment of adipocyte differentiation in 3T3 cells is inhibited by retinoic acid, and the expression of lipogenic enzymes is modulated through cytoskeleton stabilization. *Differentiation* **36**: 211–9.
- Chan KK-K, Zhang J, Chia N-Y, Chan Y-S, Sim HS, Tan KS, Oh SK-W, Ng H-H, Choo AB-H. 2009. KLF4 and PBX1 directly regulate NANOG expression in human embryonic stem cells. *Stem Cells* **27**: 2114–25.

- Chang C-P, Stankunas K, Shang C, Kao S-C, Twu KY, Cleary ML. 2008. Pbx1 functions in distinct regulatory networks to pattern the great arteries and cardiac outflow tract. *Development* **135**: 3577–86.
- Chang H-M, Martinez NJ, Thornton JE, Hagan JP, Nguyen KD, Gregory RI. 2012. Trim71 cooperates with microRNAs to repress Cdkn1a expression and promote embryonic stem cell proliferation. *Nat Commun* **3**: 923.
- Chapman AB, Knight DM, Ringold GM. 1985. Glucocorticoid regulation of adipocyte differentiation: hormonal triggering of the developmental program and induction of a differentiation-dependent gene. *J Cell Biol* **101**: 1227–35.
- Chen N, Napoli JL. 2008. All-trans-retinoic acid stimulates translation and induces spine formation in hippocampal neurons through a membrane-associated RARalpha. *FASEB J* **22**: 236–45.
- Chen SX, Cherry A, Tari PK, Podgorski K, Kwong YKK, Haas K. 2012. The transcription factor MEF2 directs developmental visually driven functional and structural metaplasticity. *Cell* **151**: 41–55.
- Chen Y, Pan FC, Brandes N, Afelik S, Sölter M, Pieler T. 2004. Retinoic acid signaling is essential for pancreas development and promotes endocrine at the expense of exocrine cell differentiation in *Xenopus*. *Dev Biol* **271**: 144–60.
- Cheng Z, Völkers M, Din S, Avitabile D, Khan M, Gude N, Mohsin S, Bo T, Truffa S, Alvarez R, et al. 2011. Mitochondrial translocation of Nur77 mediates cardiomyocyte apoptosis. *Eur Heart J* **32**: 2179–88.
- Chertow BS, Blaner WS, Baranetsky NG, Sivitz WI, Cordle MB, Thompson D, Meda P. 1987. Effects of vitamin A deficiency and repletion on rat insulin secretion in vivo and in vitro from isolated islets. *J Clin Invest* **79**: 163–169.
- Chia N-Y, Chan Y-S, Feng B, Lu X, Orlov YL, Moreau D, Kumar P, Yang L, Jiang J, Lau M-S, et al. 2010. A genome-wide RNAi screen reveals determinants of human embryonic stem cell identity. *Nature* **468**: 316–20.
- Choy L, Derynck R. 2003. Transforming growth factor-beta inhibits adipocyte differentiation by Smad3 interacting with CCAAT/enhancer-binding protein (C/EBP) and repressing C/EBP transactivation function. *J Biol Chem* **278**: 9609–19.
- Choy L, Skillington J, Derynck R. 2000. Roles of autocrine TGF-beta receptor and Smad signaling in adipocyte differentiation. *J Cell Biol* **149**: 667–82.
- Coffman RL, Lebman DA, Shrader B. 1989. Transforming growth factor beta specifically enhances IgA production by lipopolysaccharide-stimulated murine B lymphocytes. *J Exp Med* **170**: 1039–44.

- Corcoran LM, Karvelas M, Nossal GJ, Ye ZS, Jacks T, Baltimore D. 1993. Oct-2, although not required for early B-cell development, is critical for later B-cell maturation and for postnatal survival. *Genes Dev* **7**: 570–82.
- Creyghton MP, Cheng AW, Welstead GG, Kooistra T, Carey BW, Steine EJ, Hanna J, Lodato MA, Frampton GM, Sharp PA, et al. 2010. Histone H3K27ac separates active from poised enhancers and predicts developmental state. *Proc Natl Acad Sci U S A* **107**: 21931–6.
- Derecka M, Gornicka A, Koralov SB, Szczepanek K, Morgan M, Raje V, Sisler J, Zhang Q, Otero D, Cichy J, et al. 2012. Tyk2 and Stat3 regulate brown adipose tissue differentiation and obesity. *Cell Metab* **16**: 814–24.
- Dichmann DS, Harland RM. 2011. Nkx6 genes pattern the frog neural plate and Nkx6.1 is necessary for motoneuron axon projection. *Dev Biol* **349**: 378–86.
- Dominguez MH, Ayoub AE, Rakic P. 2013. POU-III transcription factors (Brn1, Brn2, and Oct6) influence neurogenesis, molecular identity, and migratory destination of upper-layer cells of the cerebral cortex. *Cereb Cortex* **23**: 2632–43.
- El-Gohary Y, Tulachan S, Guo P, Welsh C, Wiersch J, Prasad K, Paredes J, Shiota C, Xiao X, Wada Y, et al. 2013. Smad signaling pathways regulate pancreatic endocrine development. *Dev Biol* **378**: 83–93.
- Epperly MW, Cao S, Goff J, Shields D, Zhou S, Glowacki J, Greenberger JS. 2005. Increased longevity of hematopoiesis in continuous bone marrow cultures and adipocytogenesis in marrow stromal cells derived from Smad3(-/-) mice. *Exp Hematol* **33**: 353–62.
- Ernst P, Hahm K, Trinh L, Davis JN, Roussel MF, Turck CW, Smale ST. 1996. A potential role for Elf-1 in terminal transferase gene regulation. *Mol Cell Biol* **16**: 6121–31.
- Eyquem S, Chemin K, Fasseu M, Bories J-C. 2004a. The Ets-1 transcription factor is required for complete pre-T cell receptor function and allelic exclusion at the T cell receptor beta locus. *Proc Natl Acad Sci U S A* **101**: 15712–7.
- Eyquem S, Chemin K, Fasseu M, Chopin M, Sigaux F, Cumano A, Bories J-C. 2004b. The development of early and mature B cells is impaired in mice deficient for the Ets-1 transcription factor. *Eur J Immunol* **34**: 3187–96.
- Feldman N, Gerson A, Fang J, Li E, Zhang Y, Shinkai Y, Cedar H, Bergman Y. 2006. G9a-mediated irreversible epigenetic inactivation of Oct-3/4 during early embryogenesis. *Nat Cell Biol* **8**: 188–94.
- Ferri ALM. 2004. Sox2 deficiency causes neurodegeneration and impaired neurogenesis in the adult mouse brain. *Development* **131**: 3805–3819.

- Fidalgo M, Faiola F, Pereira C-F, Ding J, Saunders A, Gingold J, Schaniel C, Lemischka IR, Silva JCR, Wang J. 2012. Zfp281 mediates Nanog autorepression through recruitment of the NuRD complex and inhibits somatic cell reprogramming. *Proc Natl Acad Sci U S A* **109**: 16202–7.
- Fidalgo M, Shekar PC, Ang Y-S, Fujiwara Y, Orkin SH, Wang J. 2011. Zfp281 functions as a transcriptional repressor for pluripotency of mouse embryonic stem cells. *Stem Cells* **29**: 1705–16.
- Fisch S, Gray S, Heymans S, Haldar SM, Wang B, Pfister O, Cui L, Kumar A, Lin Z, Sen-Banerjee S, et al. 2007. Kruppel-like factor 15 is a regulator of cardiomyocyte hypertrophy. *Proc Natl Acad Sci U S A* **104**: 7074–9.
- Flavell SW, Cowan CW, Kim T-K, Greer PL, Lin Y, Paradis S, Griffith EC, Hu LS, Chen C, Greenberg ME. 2006. Activity-dependent regulation of MEF2 transcription factors suppresses excitatory synapse number. *Science* **311**: 1008–12.
- Flora A, Garcia JJ, Thaller C, Zoghbi HY. 2007. The E-protein Tcf4 interacts with Math1 to regulate differentiation of a specific subset of neuronal progenitors. *Proc Natl Acad Sci U S A* **104**: 15382–7.
- Forrest D, Vennström B. 2000. Functions of thyroid hormone receptors in mice. *Thyroid* **10**: 41–52.
- Fraichard A, Chassande O, Plateroti M, Roux JP, Trouillas J, Dehay C, Legrand C, Gauthier K, Kedinger M, Malaval L, et al. 1997. The T3R alpha gene encoding a thyroid hormone receptor is essential for post-natal development and thyroid hormone production. *EMBO J* **16**: 4412–20.
- Fu H, Cai J, Clevers H, Fast E, Gray S, Greenberg R, Jain MK, Ma Q, Qiu M, Rowitch DH, et al. 2009. A genome-wide screen for spatially restricted expression patterns identifies transcription factors that regulate glial development. *J Neurosci* **29**: 11399–408.
- Gaber ZB, Butler SJ, Novitch BG. 2013. PLZF regulates fibroblast growth factor responsiveness and maintenance of neural progenitors. *PLoS Biol* **11**: e1001676.
- Gachon F, Fonjallaz P, Damiola F, Gos P, Kodama T, Zakany J, Duboule D, Petit B, Tafti M, Schibler U. 2004. The loss of circadian PAR bZip transcription factors results in epilepsy. *Genes Dev* **18**: 1397–412.
- Gao Z, Kim GH, Mackinnon AC, Flagg AE, Bassett B, Earley JU, Svensson EC. 2010. Ets1 is required for proper migration and differentiation of the cardiac neural crest. *Development* **137**: 1543–51.
- Gauthier K, Chassande O, Plateroti M, Roux JP, Legrand C, Pain B, Rousset B, Weiss R, Trouillas J, Samarut J. 1999. Different functions for the thyroid hormone

receptors TRalpha and TRbeta in the control of thyroid hormone production and post-natal development. *EMBO J* **18**: 623–31.

Gauthier K, Plateroti M, Harvey CB, Williams GR, Weiss RE, Refetoff S, Willott JF, Sundin V, Roux JP, Malaval L, et al. 2001. Genetic analysis reveals different functions for the products of the thyroid hormone receptor alpha locus. *Mol Cell Biol* **21**: 4748–60.

Gautier L, Cope L, Bolstad BM, Irizarry RA. 2004. affy--analysis of Affymetrix GeneChip data at the probe level. *Bioinformatics* **20**: 307–15.

Gekas C, Rhodes KE, Gereige LM, Helgadottir H, Ferrari R, Kurdistan SK, Montecino-Rodriguez E, Bassel-Duby R, Olson E, Krivtsov A V, et al. 2009. Mef2C is a lineage-restricted target of Scl/Tal1 and regulates megakaryopoiesis and B-cell homeostasis. *Blood* **113**: 3461–71.

Gong X, Tang X, Wiedmann M, Wang X, Peng J, Zheng D, Blair LAC, Marshall J, Mao Z. 2003. Cdk5-mediated inhibition of the protective effects of transcription factor MEF2 in neurotoxicity-induced apoptosis. *Neuron* **38**: 33–46.

Gordon AR, Outram S V, Keramatipour M, Goddard CA, Colledge WH, Metcalfe JC, Hager-Theodorides AL, Crompton T, Kemp PR. 2008. Splenomegaly and modified erythropoiesis in KLF13-/- mice. *J Biol Chem* **283**: 11897–904.

Graham V, Khudyakov J, Ellis P, Pevny L. 2003. SOX2 functions to maintain neural progenitor identity. *Neuron* **39**: 749–65.

Grant CE, Bailey TL, Noble WS. 2011. FIMO: scanning for occurrences of a given motif. *Bioinformatics* **27**: 1017–8.

Grant PA, Thompson CB, Pettersson S. 1995. IgM receptor-mediated transactivation of the IgH 3' enhancer couples a novel Elf-1-AP-1 protein complex to the developmental control of enhancer function. *EMBO J* **14**: 4501–13.

Green MR, Monti S, Dalla-Favera R, Pasqualucci L, Walsh NC, Schmidt-Supprian M, Kutok JL, Rodig SJ, Neuberg DS, Rajewsky K, et al. 2011. Signatures of murine B-cell development implicate Yy1 as a regulator of the germinal center-specific program. *Proc Natl Acad Sci U S A* **108**: 2873–8.

Gruber PJ, Kubalak SW, Pexieder T, Sucov HM, Evans RM, Chien KR. 1996. RXR alpha deficiency confers genetic susceptibility for aortic sac, conotruncal, atrioventricular cushion, and ventricular muscle defects in mice. *J Clin Invest* **98**: 1332–43.

Gutschner T, Hämmerle M, Eissmann M, Hsu J, Kim Y, Hung G, Revenko A, Arun G, Stentrup M, Gross M, et al. 2013. The noncoding RNA MALAT1 is a critical regulator of the metastasis phenotype of lung cancer cells. *Cancer Res* **73**: 1180–9.

- Hagan JP, Piskounova E, Gregory RI. 2009. Lin28 recruits the TUTase Zcchc11 to inhibit let-7 maturation in mouse embryonic stem cells. *Nat Struct Mol Biol* **16**: 1021–5.
- Hauner H, Schmid P, Pfeiffer EF. 1987. Glucocorticoids and insulin promote the differentiation of human adipocyte precursor cells into fat cells. *J Clin Endocrinol Metab* **64**: 832–5.
- Hawkins RD, Hon GC, Yang C, Antosiewicz-Bourget JE, Lee LK, Ngo Q-M, Klugman S, Ching KA, Edsall LE, Ye Z, et al. 2011. Dynamic chromatin states in human ES cells reveal potential regulatory sequences and genes involved in pluripotency. *Cell Res* **21**: 1393–409.
- He J, Shen L, Wan M, Taranova O, Wu H, Zhang Y. 2013. Kdm2b maintains murine embryonic stem cell status by recruiting PRC1 complex to CpG islands of developmental genes. *Nat Cell Biol* **15**: 373–84.
- Hnisz D, Abraham BJ, Lee TI, Lau A, Saint-André V, Sigova A a, Hoke H a, Young R a. 2013. Super-enhancers in the control of cell identity and disease. *Cell* **155**: 934–47.
- Horb ME, Shen CN, Tosh D, Slack JMW. 2003. Experimental conversion of liver to pancreas. *Curr Biol* **13**: 105–15.
- Hua P, Liu W, Kuo S-H, Zhao Y, Chen L, Zhang N, Wang C, Guo S, Wang L, Xiao H, et al. 2012a. Association of Tef polymorphism with depression in Parkinson disease. *Mov Disord* **27**: 1694–7.
- Hua P, Liu W, Zhao Y, Ding H, Wang L, Xiao H. 2012b. Tef polymorphism is associated with sleep disturbances in patients with Parkinson's disease. *Sleep Med* **13**: 297–300.
- Iadecola C, Salkowski CA, Zhang F, Aber T, Nagayama M, Vogel SN, Ross ME. 1999. The transcription factor interferon regulatory factor 1 is expressed after cerebral ischemia and contributes to ischemic brain injury. *J Exp Med* **189**: 719–27.
- Ieda M, Fu J-D, Delgado-Olguin P, Vedantham V, Hayashi Y, Bruneau BG, Srivastava D. 2010. Direct reprogramming of fibroblasts into functional cardiomyocytes by defined factors. *Cell* **142**: 375–86.
- Ivanova N, Dobrin R, Lu R, Kotenko I, Levorse J, DeCoste C, Schafer X, Lun Y, Lemischka IR. 2006. Dissecting self-renewal in stem cells with RNA interference. *Nature* **442**: 533–8.
- Jackson M, Krassowska A, Gilbert N, Chevassut T, Forrester L, Ansell J, Ramsahoye B. 2004. Severe global DNA hypomethylation blocks differentiation and induces histone hyperacetylation in embryonic stem cells. *Mol Cell Biol* **24**: 8862–71.

- Janesick A, Abbey R, Chung C, Liu S, Taketani M, Blumberg B. 2013. ERF and ETV3L are retinoic acid-inducible repressors required for primary neurogenesis. *Development* **140**: 3095–106.
- Jarosinski KW, Massa PT. 2002. Interferon regulatory factor-1 is required for interferon-gamma-induced MHC class I genes in astrocytes. *J Neuroimmunol* **122**: 74–84.
- Jensen J, Pedersen EE, Galante P, Hald J, Heller RS, Ishibashi M, Kageyama R, Guillemot F, Serup P, Madsen OD. 2000. Control of endodermal endocrine development by Hes-1. *Nat Genet* **24**: 36–44.
- Jeyaraj D, Scheer FAJL, Ripperger JA, Haldar SM, Lu Y, Prosdocimo DA, Eapen SJ, Eapen BL, Cui Y, Mahabeleshwar GH, et al. 2012. Klf15 orchestrates circadian nitrogen homeostasis. *Cell Metab* **15**: 311–23.
- Jiang D-S, Li L, Huang L, Gong J, Xia H, Liu X, Wan N, Wei X, Zhu X, Chen Y, et al. 2014. Interferon regulatory factor 1 is required for cardiac remodeling in response to pressure overload. *Hypertension* **64**: 77–86.
- Jolma A, Yan J, Whittington T, Toivonen J, Nitta KR, Rastas P, Morgunova E, Enge M, Taipale M, Wei G, et al. 2013. DNA-binding specificities of human transcription factors. *Cell* **152**: 327–39.
- Jonsson J, Carlsson L, Edlund T, Edlund H. 1994. Insulin-promoter-factor 1 is required for pancreas development in mice. *Nature* **371**: 606–9.
- Kagey MH, Newman JJ, Bilodeau S, Zhan Y, Orlando DA, van Berkum NL, Ebmeier CC, Goossens J, Rahl PB, Levine SS, et al. 2010. Mediator and cohesin connect gene expression and chromatin architecture. *Nature* **467**: 430–5.
- Kageyama R, Ohtsuka T, Tomita K. 2000. The bHLH gene Hes1 regulates differentiation of multiple cell types. *Mol Cells* **10**: 1–7.
- Kamei Y, Kawada T, Mizukami J, Sugimoto E. 1994. The prevention of adipose differentiation of 3T3-L1 cells caused by retinoic acid is elicited through retinoic acid receptor alpha. *Life Sci* **55**: PL307–12.
- Kanatani S, Yozu M, Tabata H, Nakajima K. 2008. COUP-TFII is preferentially expressed in the caudal ganglionic eminence and is involved in the caudal migratory stream. *J Neurosci* **28**: 13582–91.
- Kastner P, Grondona JM, Mark M, Gansmuller A, LeMeur M, Decimo D, Vonesch JL, Dollé P, Chambon P. 1994. Genetic analysis of RXR alpha developmental function: convergence of RXR and RAR signaling pathways in heart and eye morphogenesis. *Cell* **78**: 987–1003.
- Kastner P, Messaddeq N, Mark M, Wendling O, Grondona JM, Ward S, Ghyselinck N, Chambon P. 1997. Vitamin A deficiency and mutations of RXRalpha, RXRbeta and

RARalpha lead to early differentiation of embryonic ventricular cardiomyocytes. *Development* **124**: 4749–58.

- Kim BJ, Takamoto N, Yan J, Tsai SY, Tsai M-J. 2009. Chicken Ovalbumin Upstream Promoter-Transcription Factor II (COUP-TFII) regulates growth and patterning of the postnatal mouse cerebellum. *Dev Biol* **326**: 378–91.
- Kovalovsky D, Uche OU, Eladad S, Hobbs RM, Yi W, Alonzo E, Chua K, Eidson M, Kim H-J, Im JS, et al. 2008. The BTB-zinc finger transcriptional regulator PLZF controls the development of invariant natural killer T cell effector functions. *Nat Immunol* **9**: 1055–64.
- Kunarso G, Chia N-Y, Jeyakani J, Hwang C, Lu X, Chan Y-S, Ng H-H, Bourque G. 2010. Transposable elements have rewired the core regulatory network of human embryonic stem cells. *Nat Genet* **42**: 631–4.
- Kuri-Harcuch W. 1982. Differentiation of 3T3-F442A cells into adipocytes is inhibited by retinoic acid. *Differentiation* **23**: 164–9.
- Kwiatkowski N, Zhang T, Rahl PB, Abraham BJ, Reddy J, Ficarro SB, Dastur A, Amzallag A, Ramaswamy S, Tesar B, et al. 2014. Targeting transcription regulation in cancer with a covalent CDK7 inhibitor. *Nature* **511**: 616–20.
- Langmead B, Trapnell C, Pop M, Salzberg SL. 2009. Ultrafast and memory-efficient alignment of short DNA sequences to the human genome. *Genome Biol* **10**: R25.
- Laurent LC, Chen J, Ulitsky I, Mueller F-J, Lu C, Shamir R, Fan J-B, Loring JF. 2008. Comprehensive microRNA profiling reveals a unique human embryonic stem cell signature dominated by a single seed sequence. *Stem Cells* **26**: 1506–16.
- Lavallée G, Andelfinger G, Nadeau M, Lefebvre C, Nemer G, Horb ME, Nemer M. 2006. The Kruppel-like transcription factor KLF13 is a novel regulator of heart development. *EMBO J* **25**: 5201–13.
- Lee RY, Luo J, Evans RM, Giguere V, Sucov HM. 1997. Compartment-selective sensitivity of cardiovascular morphogenesis to combinations of retinoic acid receptor gene mutations. *Circ Res* **80**: 757–64.
- Lee TI, Jenner RG, Boyer LA, Guenther MG, Levine SS, Kumar RM, Chevalier B, Johnstone SE, Cole MF, Isono K, et al. 2006. Control of developmental regulators by Polycomb in human embryonic stem cells. *Cell* **125**: 301–13.
- Leenders JJ, Wijnen WJ, Hiller M, van der Made I, Lentink V, van Leeuwen REW, Herias V, Pokharel S, Heymans S, de Windt LJ, et al. 2010. Regulation of cardiac gene expression by KLF15, a repressor of myocardin activity. *J Biol Chem* **285**: 27449–56.

- Li QY, Newbury-Ecob RA, Terrett JA, Wilson DI, Curtis AR, Yi CH, Gebuhr T, Bullen PJ, Robson SC, Strachan T, et al. 1997. Holt-Oram syndrome is caused by mutations in TBX5, a member of the Brachyury (T) gene family. *Nat Genet* **15**: 21–9.
- Li S, Miao T, Sebastian M, Bhullar P, Ghaffari E, Liu M, Symonds ALJ, Wang P. 2012. The transcription factors Egr2 and Egr3 are essential for the control of inflammation and antigen-induced proliferation of B and T cells. *Immunity* **37**: 685–96.
- Li Y, Drnevich J, Akraiko T, Band M, Li D, Wang F, Matoba R, Tanaka TS. Gene expression profiling reveals the heterogeneous transcriptional activity of Oct3/4 and its possible interaction with Gli2 in mouse embryonic stem cells. *Genomics* **102**: 456–67.
- Li Y, Lv Z, He G, Wang J, Zhang X, Lu G, Ren X, Wang F, Zhu X, Ding Y, et al. 2015. The SOX17/miR-371-5p/SOX2 axis inhibits EMT, stem cell properties and metastasis in colorectal cancer. *Oncotarget* **6**: 9099–9112.
- Lien C, Fang C-M, Huso D, Livak F, Lu R, Pitha PM. 2010. Critical role of IRF-5 in regulation of B-cell differentiation. *Proc Natl Acad Sci U S A* **107**: 4664–8.
- Lin CY, Lovén J, Rahl PB, Paranal RM, Burge CB, Bradner JE, Lee TI, Young RA. 2012. Transcriptional Amplification in Tumor Cells with Elevated c-Myc. *Cell* **151**: 56–67.
- Lin H, Grosschedl R. 1995. Failure of B-cell differentiation in mice lacking the transcription factor EBF. *Nature* **376**: 263–7.
- Lin H-M, Lee J-H, Yadav H, Kamaraju AK, Liu E, Zhigang D, Vieira A, Kim S-J, Collins H, Matschinsky F, et al. 2009. Transforming growth factor-beta/Smad3 signaling regulates insulin gene transcription and pancreatic islet beta-cell function. *J Biol Chem* **284**: 12246–57.
- Lints TJ, Parsons LM, Hartley L, Lyons I, Harvey RP. 1993. Nkx-2.5: a novel murine homeobox gene expressed in early heart progenitor cells and their myogenic descendants. *Development* **119**: 419–31.
- Liu H, Schmidt-Supprian M, Shi Y, Hobeika E, Barteneva N, Jumaa H, Pelanda R, Reth M, Skok J, Rajewsky K, et al. 2007. Yin Yang 1 is a critical regulator of B-cell development. *Genes Dev* **21**: 1179–89.
- Lovén J, Hoke HA, Lin CY, Lau A, Orlando DA, Vakoc CR, Bradner JE, Lee TI, Young RA. 2013. Selective inhibition of tumor oncogenes by disruption of super-enhancers. *Cell* **153**: 320–34.
- Lu R, Medina KL, Lancki DW, Singh H. 2003. IRF-4,8 orchestrate the pre-B-to-B transition in lymphocyte development. *Genes Dev* **17**: 1703–8.

- Lujan E, Chanda S, Ahlenius H, Südhof TC, Wernig M. 2012. Direct conversion of mouse fibroblasts to self-renewing, tripotent neural precursor cells. *Proc Natl Acad Sci U S A* **109**: 2527–32.
- Luo J, Sucov HM, Bader JA, Evans RM, Giguère V. 1996. Compound mutants for retinoic acid receptor (RAR) beta and RAR alpha 1 reveal developmental functions for multiple RAR beta isoforms. *Mech Dev* **55**: 33–44.
- Lyons I, Parsons LM, Hartley L, Li R, Andrews JE, Robb L, Harvey RP. 1995. Myogenic and morphogenetic defects in the heart tubes of murine embryos lacking the homeo box gene Nkx2-5. *Genes Dev* **9**: 1654–66.
- Ma P, Xia Y, Ma L, Zhao S, Mao B. 2013. Xenopus Nkx6.1 and Nkx6.2 are required for mid-hindbrain boundary development. *Dev Genes Evol* **223**: 253–9.
- Mahmoud AI, Kocabas F, Muralidhar SA, Kimura W, Koura AS, Thet S, Porrello ER, Sadek HA. 2013. Meis1 regulates postnatal cardiomyocyte cell cycle arrest. *Nature* **497**: 249–53.
- Maier H, Ostraat R, Parenti S, Fitzsimmons D, Abraham LJ, Garvie CW, Hagman J. 2003. Requirements for selective recruitment of Ets proteins and activation of mb-1/Ig-alpha gene transcription by Pax-5 (BSAP). *Nucleic Acids Res* **31**: 5483–9.
- Marson A, Levine SS, Cole MF, Frampton GM, Brambrink T, Johnstone S, Guenther MG, Johnston WK, Wernig M, Newman J, et al. 2008. Connecting microRNA genes to the core transcriptional regulatory circuitry of embryonic stem cells. *Cell* **134**: 521–33.
- Mathelier A, Zhao X, Zhang AW, Parcy F, Worsley-Hunt R, Arenillas DJ, Buchman S, Chen C, Chou A, Ienasescu H, et al. 2014. JASPAR 2014: an extensively expanded and updated open-access database of transcription factor binding profiles. *Nucleic Acids Res* **42**: D142–7.
- Matthews KA, Rhoten WB, Driscoll HK, Chertow BS. 2004. Vitamin A deficiency impairs fetal islet development and causes subsequent glucose intolerance in adult rats. *J Nutr* **134**: 1958–63.
- Matys V, Kel-Margoulis O V, Fricke E, Liebich I, Land S, Barre-Dirrie A, Reuter I, Chekmenev D, Krull M, Hornischer K, et al. 2006. TRANSFAC and its module TRANSCOMP: transcriptional gene regulation in eukaryotes. *Nucleic Acids Res* **34**: D108–10.
- McNulty SE, Barrett RM, Vogel-Ciernia A, Malvaez M, Hernandez N, Davatolhagh MF, Matheos DP, Schiffman A, Wood MA. 2012. Differential roles for Nr4a1 and Nr4a2 in object location vs. object recognition long-term memory. *Learn Mem* **19**: 588–92.
- Medeiros LA, Dennis LM, Gill ME, Houbaviy H, Markoulaki S, Fu D, White AC, Kirak O, Sharp PA, Page DC, et al. 2011. Mir-290-295 deficiency in mice results in partially

- penetrant embryonic lethality and germ cell defects. *Proc Natl Acad Sci U S A* **108**: 14163–8.
- Melton C, Judson RL, Blelloch R. 2010. Opposing microRNA families regulate self-renewal in mouse embryonic stem cells. *Nature* **463**: 621–6.
- Mendelsohn C, Lohnes D, Décimo D, Lufkin T, LeMeur M, Chambon P, Mark M. 1994. Function of the retinoic acid receptors (RARs) during development (II). Multiple abnormalities at various stages of organogenesis in RAR double mutants. *Development* **120**: 2749–71.
- Minamino K, Takahara K, Adachi T, Nagaoka K, Iyoda T, Taki S, Inaba K. 2012. IRF-2 regulates B-cell proliferation and antibody production through distinct mechanisms. *Int Immunol* **24**: 573–81.
- Miskolczi-McCallum CM, Scavetta RJ, Svendsen PC, Soanes KH, Brook WJ. 2005. The *Drosophila melanogaster* T-box genes midline and H15 are conserved regulators of heart development. *Dev Biol* **278**: 459–72.
- Monteiro MC, Sanyal M, Cleary ML, Sengenès C, Bouloumié A, Bouloumé A, Dani C, Billon N. 2011. PBX1: a novel stage-specific regulator of adipocyte development. *Stem Cells* **29**: 1837–48.
- Murray T, Russell TR. 1980. Inhibition of adipose conversion in 3T3-L2 cells by retinoic acid. *J Supramol Struct* **14**: 255–66.
- Naka H, Nakamura S, Shimazaki T, Okano H. 2008. Requirement for COUP-TFI and II in the temporal specification of neural stem cells in CNS development. *Nat Neurosci* **11**: 1014–23.
- Nakae J, Kitamura T, Kitamura Y, Biggs WH, Arden KC, Accili D. 2003. The forkhead transcription factor Foxo1 regulates adipocyte differentiation. *Dev Cell* **4**: 119–29.
- Nam Y-J, Lubczyk C, Bhakta M, Zang T, Fernandez-Perez A, McAnally J, Bassel-Duby R, Olson EN, Munshi N V. 2014. Induction of diverse cardiac cell types by reprogramming fibroblasts with cardiac transcription factors. *Development* **141**: 4267–78.
- Nanbu-Wakao R, Morikawa Y, Matsumura I, Masuho Y, Muramatsu M-A, Senba E, Wakao H. 2002. Stimulation of 3T3-L1 adipogenesis by signal transducer and activator of transcription 5. *Mol Endocrinol* **16**: 1565–76.
- Neph S, Stergachis AB, Reynolds A, Sandstrom R, Borenstein E, Stamatoyannopoulos JA. 2012. Circuitry and dynamics of human transcription factor regulatory networks. *Cell* **150**: 1274–86.
- Noack C, Zafiriou M-P, Schaeffer H-J, Renger A, Pavlova E, Dietz R, Zimmermann WH, Bergmann MW, Zelarayán LC. 2012. Krueppel-like factor 15 regulates Wnt/ $\beta$ -

- catenin transcription and controls cardiac progenitor cell fate in the postnatal heart. *EMBO Mol Med* **4**: 992–1007.
- Nomoto M, Takeda Y, Uchida S, Mitsuda K, Enomoto H, Saito K, Choi T, Watabe AM, Kobayashi S, Masushige S, et al. 2012. Dysfunction of the RAR/RXR signaling pathway in the forebrain impairs hippocampal memory and synaptic plasticity. *Mol Brain* **5**: 8.
- Nutt SL, Heavey B, Rolink AG, Busslinger M. 1999. Commitment to the B-lymphoid lineage depends on the transcription factor Pax5. *Nature* **401**: 556–62.
- Öström M, Loffler KA, Edfalk S, Selander L, Dahl U, Ricordi C, Jeon J, Correa-Medina M, Diez J, Edlund H. 2008. Retinoic Acid Promotes the Generation of Pancreatic Endocrine Progenitor Cells and Their Further Differentiation into  $\beta$ -Cells ed. T. Zwaka. *PLoS One* **3**: e2841.
- Outram S V, Gordon AR, Hager-Theodorides AL, Metcalfe J, Crompton T, Kemp P. 2008. KLF13 influences multiple stages of both B and T cell development. *Cell Cycle* **7**: 2047–55.
- Pai JT, Guryev O, Brown MS, Goldstein JL. 1998. Differential stimulation of cholesterol and unsaturated fatty acid biosynthesis in cells expressing individual nuclear sterol regulatory element-binding proteins. *J Biol Chem* **273**: 26138–48.
- Pan X, Papasani M, Hao Y, Calamito M, Wei F, Quinn Iii WJ, Basu A, Wang J, Hodawadekar S, Zaprazna K, et al. 2013. YY1 controls Igk repertoire and B-cell development, and localizes with condensin on the Igk locus. *EMBO J* **32**: 1168–82.
- Park KC, Shimizu K, Hayakawa T, Tanaka N. 1998. Regulation of interferon responses in medulloblastoma cells by interferon regulatory factor-1 and -2. *Br J Cancer* **77**: 2081–7.
- Peng SL, Gerth AJ, Ranger AM, Glimcher LH. 2001. NFATc1 and NFATc2 together control both T and B cell activation and differentiation. *Immunity* **14**: 13–20.
- Pereira FA, Qiu Y, Zhou G, Tsai MJ, Tsai SY. 1999. The orphan nuclear receptor COUP-TFII is required for angiogenesis and heart development. *Genes Dev* **13**: 1037–49.
- Pla P, Hirsch M-R, Le Crom S, Reiprich S, Harley VR, Goridis C. 2008. Identification of Phox2b-regulated genes by expression profiling of cranial motoneuron precursors. *Neural Dev* **3**: 14.
- Prosdocimo DA, Anand P, Liao X, Zhu H, Shelkay S, Artero-Calderon P, Zhang L, Kirsh J, Moore D, Rosca MG, et al. 2014. Kruppel-like factor 15 is a critical regulator of cardiac lipid metabolism. *J Biol Chem* **289**: 5914–24.
- Raberger J, Schebesta A, Sakaguchi S, Boucheron N, Blomberg KEM, Berglöff A, Kolbe T, Smith CIE, Rülcke T, Ellmeier W. 2008. The transcriptional regulator PLZF

- induces the development of CD44 high memory phenotype T cells. *Proc Natl Acad Sci U S A* **105**: 17919–24.
- Ramsköld D, Wang ET, Burge CB, Sandberg R. 2009. An abundance of ubiquitously expressed genes revealed by tissue transcriptome sequence data. *PLoS Comput Biol* **5**: e1000598.
- Rao S, Karray S, Gackstetter ER, Koshland ME. 1998. Myocyte enhancer factor-related B-MEF2 is developmentally expressed in B cells and regulates the immunoglobulin J chain promoter. *J Biol Chem* **273**: 26123–9.
- Reim I, Mohler JP, Frasch M. 2005. Tbx20-related genes, mid and H15, are required for tinman expression, proper patterning, and normal differentiation of cardioblasts in *Drosophila*. *Mech Dev* **122**: 1056–69.
- Robasky K, Bulyk ML. 2011. UniPROBE, update 2011: expanded content and search tools in the online database of protein-binding microarray data on protein-DNA interactions. *Nucleic Acids Res* **39**: D124–8.
- Rosen ED, Sarraf P, Troy AE, Bradwin G, Moore K, Milstone DS, Spiegelman BM, Mortensen RM. 1999. PPAR gamma is required for the differentiation of adipose tissue in vivo and in vitro. *Mol Cell* **4**: 611–7.
- Ross SE, Hemati N, Longo KA, Bennett CN, Lucas PC, Erickson RL, MacDougald OA. 2000. Inhibition of adipogenesis by Wnt signaling. *Science* **289**: 950–3.
- Sakamoto Y, Hara K, Kanai-Azuma M, Matsui T, Miura Y, Tsunekawa N, Kurohmaru M, Saijoh Y, Koopman P, Kanai Y. 2007. Redundant roles of Sox17 and Sox18 in early cardiovascular development of mouse embryos. *Biochem Biophys Res Commun* **360**: 539–44.
- Salma J, McDermott JC. 2012. Suppression of a MEF2-KLF6 survival pathway by PKA signaling promotes apoptosis in embryonic hippocampal neurons. *J Neurosci* **32**: 2790–803.
- Savage AK, Constantinides MG, Han J, Picard D, Martin E, Li B, Lantz O, Bendelac A. 2008. The transcription factor PLZF directs the effector program of the NKT cell lineage. *Immunity* **29**: 391–403.
- Schaefer U, Schmeier S, Bajic VB. 2011. TcoF-DB: dragon database for human transcription co-factors and transcription factor interacting proteins. *Nucleic Acids Res* **39**: D106–10.
- Schips TG, Wietelmann A, Höhn K, Schimanski S, Walther P, Braun T, Wirth T, Maier HJ. 2011. FoxO3 induces reversible cardiac atrophy and autophagy in a transgenic mouse model. *Cardiovasc Res* **91**: 587–97.

- Sekiya T, Kashiwagi I, Inoue N, Morita R, Hori S, Waldmann H, Rudensky AY, Ichinose H, Metzger D, Chambon P, et al. 2011. The nuclear orphan receptor Nr4a2 induces Foxp3 and regulates differentiation of CD4<sup>+</sup> T cells. *Nat Commun* **2**: 269.
- Sekiya T, Kashiwagi I, Yoshida R, Fukaya T, Morita R, Kimura A, Ichinose H, Metzger D, Chambon P, Yoshimura A. 2013. Nr4a receptors are essential for thymic regulatory T cell development and immune homeostasis. *Nat Immunol* **14**: 230–7.
- Sengupta A, Molkenstein JD, Paik J-H, DePinho RA, Yutzey KE. 2011. FoxO transcription factors promote cardiomyocyte survival upon induction of oxidative stress. *J Biol Chem* **286**: 7468–78.
- Sengupta A, Molkenstein JD, Yutzey KE. 2009. FoxO transcription factors promote autophagy in cardiomyocytes. *J Biol Chem* **284**: 28319–31.
- Seo K-W, Roh K-H, Bhandari DR, Park S-B, Lee S-K, Kang K-S. 2013. ZNF281 knockdown induced osteogenic differentiation of human multipotent stem cells in vivo and in vitro. *Cell Transplant* **22**: 29–40.
- Shi X, Seldin DC, Garry DJ. 2012. Foxk1 recruits the Sds3 complex and represses gene expression in myogenic progenitors. *Biochem J* **446**: 349–57.
- Singh MK. 2005. Tbx20 is essential for cardiac chamber differentiation and repression of Tbx2. *Development* **132**: 2697–2707.
- Sisodiya SM, Ragge NK, Cavalleri GL, Hever A, Lorenz B, Schneider A, Williamson KA, Stevens JM, Free SL, Thompson PJ, et al. 2006. Role of SOX2 mutations in human hippocampal malformations and epilepsy. *Epilepsia* **47**: 534–42.
- Skurk C, Izumiya Y, Maatz H, Razeghi P, Shiojima I, Sandri M, Sato K, Zeng L, Schiekhofer S, Pimentel D, et al. 2005. The FOXO3a transcription factor regulates cardiac myocyte size downstream of AKT signaling. *J Biol Chem* **280**: 20814–23.
- Smith PD, Mount MP, Shree R, Callaghan S, Slack RS, Anisman H, Vincent I, Wang X, Mao Z, Park DS. 2006. Calpain-regulated p35/cdk5 plays a central role in dopaminergic neuron death through modulation of the transcription factor myocyte enhancer factor 2. *J Neurosci* **26**: 440–7.
- Sobieszczuk DF, Poliakov A, Xu Q, Wilkinson DG. 2010. A feedback loop mediated by degradation of an inhibitor is required to initiate neuronal differentiation. *Genes Dev* **24**: 206–18.
- Song K, Nam Y-J, Luo X, Qi X, Tan W, Huang GN, Acharya A, Smith CL, Tallquist MD, Neilson EG, et al. 2012. Heart repair by reprogramming non-myocytes with cardiac transcription factors. *Nature* **485**: 599–604.

- Southwood C, He C, Garbern J, Kamholz J, Arroyo E, Gow A. 2004. CNS myelin paranodes require Nkx6-2 homeoprotein transcriptional activity for normal structure. *J Neurosci* **24**: 11215–25.
- Sparling DP, Griesel BA, Olson AL. 2007. Hyperphosphorylation of MEF2A in primary adipocytes correlates with downregulation of human GLUT4 gene promoter activity. *Am J Physiol Endocrinol Metab* **292**: E1149–56.
- Stankunas K, Shang C, Twu KY, Kao S-C, Jenkins NA, Copeland NG, Sanyal M, Selleri L, Cleary ML, Chang C-P. 2008. Pbx/Meis deficiencies demonstrate multigenetic origins of congenital heart disease. *Circ Res* **103**: 702–9.
- Stavnezer J, Kang J. 2009. The surprising discovery that TGF beta specifically induces the IgA class switch. *J Immunol* **182**: 5–7.
- Stennard FA, Costa MW, Elliott DA, Rankin S, Haast SJP, Lai D, McDonald LPA, Niederreither K, Dolle P, Bruneau BG, et al. 2003. Cardiac T-box factor Tbx20 directly interacts with Nkx2-5, GATA4, and GATA5 in regulation of gene expression in the developing heart. *Dev Biol* **262**: 206–24.
- Stennard FA, Costa MW, Lai D, Biben C, Furtado MB, Solloway MJ, McCulley DJ, Leimena C, Preis JI, Dunwoodie SL, et al. 2005. Murine T-box transcription factor Tbx20 acts as a repressor during heart development, and is essential for adult heart integrity, function and adaptation. *Development* **132**: 2451–62.
- Stolt CC, Lommes P, Friedrich RP, Wegner M. 2004. Transcription factors Sox8 and Sox10 perform non-equivalent roles during oligodendrocyte development despite functional redundancy. *Development* **131**: 2349–58.
- Stolt CC, Schmitt S, Lommes P, Sock E, Wegner M. 2005. Impact of transcription factor Sox8 on oligodendrocyte specification in the mouse embryonic spinal cord. *Dev Biol* **281**: 309–17.
- Stone RL, Bernlohr DA. 1990. The molecular basis for inhibition of adipose conversion of murine 3T3-L1 cells by retinoic acid. *Differentiation* **45**: 119–27.
- Sucov HM, Dyson E, Gumeringer CL, Price J, Chien KR, Evans RM. 1994. RXR alpha mutant mice establish a genetic basis for vitamin A signaling in heart morphogenesis. *Genes Dev* **8**: 1007–18.
- Sugitani Y, Nakai S, Minowa O, Nishi M, Jishage K-I, Kawano H, Mori K, Ogawa M, Noda T. 2002. Brn-1 and Brn-2 share crucial roles in the production and positioning of mouse neocortical neurons. *Genes Dev* **16**: 1760–5.
- Swanson BJ, Jäck HM, Lyons GE. 1998. Characterization of myocyte enhancer factor 2 (MEF2) expression in B and T cells: MEF2C is a B cell-restricted transcription factor in lymphocytes. *Mol Immunol* **35**: 445–58.

- Tabernero A, Velasco A, Granda B, Lavado EM, Medina JM. 2002. Transcytosis of albumin in astrocytes activates the sterol regulatory element-binding protein-1, which promotes the synthesis of the neurotrophic factor oleic acid. *J Biol Chem* **277**: 4240–6.
- Takeuchi JK, Mileikovskaia M, Koshiba-Takeuchi K, Heidt AB, Mori AD, Arruda EP, Gertsenstein M, Georges R, Davidson L, Mo R, et al. 2005. Tbx20 dose-dependently regulates transcription factor networks required for mouse heart and motoneuron development. *Development* **132**: 2463–74.
- Tang K, Rubenstein JLR, Tsai SY, Tsai M-J. 2012. COUP-TFII controls amygdala patterning by regulating neuropilin expression. *Development* **139**: 1630–9.
- Tessem JS, Moss LG, Chao LC, Arlotto M, Lu D, Jensen M V, Stephens SB, Tontonoz P, Hohmeier HE, Newgard CB. 2014. Nkx6.1 regulates islet  $\beta$ -cell proliferation via Nr4a1 and Nr4a3 nuclear receptors. *Proc Natl Acad Sci U S A* **111**: 5242–7.
- Tontonoz P, Hu E, Spiegelman BM. 1994. Stimulation of adipogenesis in fibroblasts by PPAR gamma 2, a lipid-activated transcription factor. *Cell* **79**: 1147–56.
- Tripathi V, Ellis JD, Shen Z, Song DY, Pan Q, Watt AT, Freier SM, Bennett CF, Sharma A, Bubulya PA, et al. 2010. The nuclear-retained noncoding RNA MALAT1 regulates alternative splicing by modulating SR splicing factor phosphorylation. *Mol Cell* **39**: 925–38.
- Tripathi V, Shen Z, Chakraborty A, Giri S, Freier SM, Wu X, Zhang Y, Gorospe M, Prasanth SG, Lal A, et al. 2013. Long noncoding RNA MALAT1 controls cell cycle progression by regulating the expression of oncogenic transcription factor B-MYB. *PLoS Genet* **9**: e1003368.
- Tripodi M, Filosa A, Armentano M, Studer M. 2004. The COUP-TF nuclear receptors regulate cell migration in the mammalian basal forebrain. *Development* **131**: 6119–29.
- Urbánek P, Wang ZQ, Fetka I, Wagner EF, Busslinger M. 1994. Complete block of early B cell differentiation and altered patterning of the posterior midbrain in mice lacking Pax5/BSAP. *Cell* **79**: 901–12.
- Van Loo PF, Bouwman P, Ling K-W, Middendorp S, Suske G, Grosveld F, Dzierzak E, Philipsen S, Hendriks RW. 2003. Impaired hematopoiesis in mice lacking the transcription factor Sp3. *Blood* **102**: 858–66.
- Vaquerizas JM, Kummerfeld SK, Teichmann SA, Luscombe NM. 2009. A census of human transcription factors: function, expression and evolution. *Nat Rev Genet* **10**: 252–63.
- Velasco A, Tabernero A, Medina JM. 2003. Role of oleic acid as a neurotrophic factor is supported in vivo by the expression of GAP-43 subsequent to the activation of

- SREBP-1 and the up-regulation of stearyl-CoA desaturase during postnatal development of the brain. *Brain Res* **977**: 103–11.
- Viswanathan SR, Daley GQ. 2010. Lin28: A microRNA regulator with a macro role. *Cell* **140**: 445–9.
- Waki H, Nakamura M, Yamauchi T, Wakabayashi K, Yu J, Hirose-Yotsuya L, Take K, Sun W, Iwabu M, Okada-Iwabu M, et al. 2011. Global mapping of cell type-specific open chromatin by FAIRE-seq reveals the regulatory role of the NFI family in adipocyte differentiation. *PLoS Genet* **7**: e1002311.
- Wandzioch E, Zaret KS. 2009. Dynamic signaling network for the specification of embryonic pancreas and liver progenitors. *Science* **324**: 1707–10.
- Wang H, Lee CH, Qi C, Taylor P, Feng J, Abbasi S, Atsumi T, Morse HC. 2008a. IRF8 regulates B-cell lineage specification, commitment, and differentiation. *Blood* **112**: 4028–38.
- Wang Q, Maillard M, Schibler U, Burnier M, Gachon F. 2010. Cardiac hypertrophy, low blood pressure, and low aldosterone levels in mice devoid of the three circadian PAR bZip transcription factors DBP, HLF, and TEF. *Am J Physiol Regul Integr Comp Physiol* **299**: R1013–9.
- Wang R-H, He J-P, Su M-L, Luo J, Xu M, Du X-D, Chen H-Z, Wang W-J, Wang Y, Zhang N, et al. 2013. The orphan receptor TR3 participates in angiotensin II-induced cardiac hypertrophy by controlling mTOR signalling. *EMBO Mol Med* **5**: 137–48.
- Wang X, Liu X, Kong R, Zhan R, Wang X, Leng X, Gong J, Duan M, Wang L, Wu L, et al. 2009. NGFI-B targets mitochondria and induces cardiomyocyte apoptosis in restraint-stressed rats by mediating energy metabolism disorder. *Cell Stress Chaperones* **14**: 639–48.
- Wang Z-X, Teh CH-L, Chan CM-Y, Chu C, Rossbach M, Kunarso G, Allapitchay TB, Wong KY, Stanton LW. 2008b. The transcription factor Zfp281 controls embryonic stem cell pluripotency by direct activation and repression of target genes. *Stem Cells* **26**: 2791–9.
- Wei G-H, Badis G, Berger MF, Kivioja T, Palin K, Enge M, Bonke M, Jolma A, Varjosalo M, Gehrke AR, et al. 2010. Genome-wide analysis of ETS-family DNA-binding in vitro and in vivo. *EMBO J* **29**: 2147–60.
- Xu B, Zhang K, Huang Y. 2009. Lin28 modulates cell growth and associates with a subset of cell cycle regulator mRNAs in mouse embryonic stem cells. *RNA* **15**: 357–61.

- Xu Z, Yu S, Hsu C-H, Eguchi J, Rosen ED. 2008. The orphan nuclear receptor chicken ovalbumin upstream promoter-transcription factor II is a critical regulator of adipogenesis. *Proc Natl Acad Sci U S A* **105**: 2421–6.
- Yamamoto K, Sakaguchi M, Medina RJ, Niida A, Sakaguchi Y, Miyazaki M, Kataoka K, Huh N. 2010. Transcriptional regulation of a brown adipocyte-specific gene, UCP1, by KLF11 and KLF15. *Biochem Biophys Res Commun* **400**: 175–80.
- Yasuda T, Sanjo H, Pagès G, Kawano Y, Karasuyama H, Pouyssegur J, Ogata M, Kurosaki T. 2008. Erk kinases link pre-B cell receptor signaling to transcriptional events required for early B cell expansion. *Immunity* **28**: 499–508.
- Ye M, Coldren C, Liang X, Mattina T, Goldmuntz E, Benson DW, Ivy D, Perryman MB, Garrett-Sinha LA, Grossfeld P. 2010. Deletion of ETS-1, a gene in the Jacobsen syndrome critical region, causes ventricular septal defects and abnormal ventricular morphology in mice. *Hum Mol Genet* **19**: 648–56.
- Yeap L-S, Hayashi K, Surani MA. 2009. ERG-associated protein with SET domain (ESET)-Oct4 interaction regulates pluripotency and represses the trophectoderm lineage. *Epigenetics Chromatin* **2**: 12.
- Young RA. 2011. Control of the embryonic stem cell state. *Cell* **144**: 940–54.
- Yu H, Kunarso G, Hong FH, Stanton LW. 2009. Zfp206, Oct4, and Sox2 are integrated components of a transcriptional regulatory network in embryonic stem cells. *J Biol Chem* **284**: 31327–35.
- Yu J, Vodyanik MA, Smuga-Otto K, Antosiewicz-Bourget J, Frane JL, Tian S, Nie J, Jonsdottir GA, Ruotti V, Stewart R, et al. 2007. Induced pluripotent stem cell lines derived from human somatic cells. *Science* **318**: 1917–20.
- Yuan P, Han J, Guo G, Orlov YL, Huss M, Loh Y-H, Yaw L-P, Robson P, Lim B, Ng H-H. 2009. Eset partners with Oct4 to restrict extraembryonic trophoblast lineage potential in embryonic stem cells. *Genes Dev* **23**: 2507–20.
- Zhang C, Basta T, Klymkowsky MW. 2005. SOX7 and SOX18 are essential for cardiogenesis in *Xenopus*. *Dev Dyn* **234**: 878–91.
- Zhang H, Chen Q, Yang M, Zhu B, Cui Y, Xue Y, Gong N, Cui A, Wang M, Shen L, et al. 2013. Mouse KLF11 regulates hepatic lipid metabolism. *J Hepatol* **58**: 763–70.
- Zhang H-M, Chen H, Liu W, Liu H, Gong J, Wang H, Guo A-Y. 2012. AnimalTFDB: a comprehensive animal transcription factor database. *Nucleic Acids Res* **40**: D144–9.
- Zhang J, Tam W-L, Tong GQ, Wu Q, Chan H-Y, Soh B-S, Lou Y, Yang J, Ma Y, Chai L, et al. 2006. Sall4 modulates embryonic stem cell pluripotency and early embryonic development by the transcriptional regulation of Pou5f1. *Nat Cell Biol* **8**: 1114–23.

- Zhang K, Guo W, Yang Y, Wu J. 2011. JAK2/STAT3 pathway is involved in the early stage of adipogenesis through regulating C/EBP $\beta$  transcription. *J Cell Biochem* **112**: 488–97.
- Zhang Y, Liu T, Meyer CA, Eeckhoute J, Johnson DS, Bernstein BE, Nusbaum C, Myers RM, Brown M, Li W, et al. 2008. Model-based analysis of ChIP-Seq (MACS). *Genome Biol* **9**: R137.
- Zhou Q, Brown J, Kanarek A, Rajagopal J, Melton DA. 2008. In vivo reprogramming of adult pancreatic exocrine cells to beta-cells. *Nature* **455**: 627–32.
- Zhuang Y, Cheng P, Weintraub H. 1996. B-lymphocyte development is regulated by the combined dosage of three basic helix-loop-helix genes, E2A, E2-2, and HEB. *Mol Cell Biol* **16**: 2898–905.
- Zweier C, Peippo MM, Hoyer J, Sousa S, Bottani A, Clayton-Smith J, Reardon W, Saraiva J, Cabral A, Gohring I, et al. 2007. Haploinsufficiency of TCF4 causes syndromal mental retardation with intermittent hyperventilation (Pitt-Hopkins syndrome). *Am J Hum Genet* **80**: 994–1001.
