# Supplementary material for: Models of human core transcriptional regulatory circuitries
Source: HighWire-hosted journal article supplement (doi:10.1101/gr.197590.115), 2016-02-03
Supplement: Table_S1.xlsx [file Table_S1.xlsx]

## Sheet: Sheet2
Table S1. List of samples and GEO accession numbers
Sample Name	Cell/Tissue Type	Subtype	is cell type or tissue	is normal or cancer or fetal	H3K27ac ChIP-seq	Input ChIP-seq	Expression data
Astrocytes	Astrocyte		cell type	normal	GSM733763	GSM733678
BI_Adipose_Nuclei	Adipose	Adipose Nuclei	tissue	normal	GSM916066	GM621401	GSM685065, GSM685066, GSM685067, GSM685068, GSM685069, GSM685070, GSM685071, GSM685072, GSM685073
BI_Brain_Angular_Gyrus	Brain	Angular Gyrus	tissue	normal	GSM773016	GSM772931
BI_Brain_Anterior_Caudate	Brain	Anterior Caudate	tissue	normal	GSM772832	GSM772826
BI_Brain_Cingulate_Gyrus	Brain	Cingulate Gyrus	tissue	normal	GSM773011	GSM772990
BI_Brain_Hippocampus_Middle	Brain	Hippocampus Middle	tissue	normal	GSM773020	GSM773019	GSM175987, GSM175988, GSM175861, GSM176052, GSM176174, GSM176175, GSM176176, GSM176177
BI_Brain_Inferior_Temporal_Lobe	Brain	Inferior Temporal Lobe	tissue	normal	GSM772995	GSM772991	GSM175874, GSM175875, GSM175876, GSM175877, GSM176060, GSM176214, GSM176069, GSM176215
BI_Brain_Mid_Frontal_Lobe	Brain	Frontal Lobe	tissue	normal	GSM773015	GSM773010
BI_CD34_Primary_RO01480	Blood	HSC	cell type	normal	GSM772885	GSM706847
BI_CD34_Primary_RO01536	Blood	HSC	cell type	normal	GSM772870	GSM772950
BI_CD34_Primary_RO01549	Blood	HSC	cell type	normal	GSM772894	GSM706846
BI_CD4_Memory_Primary_7pool	Blood	CD4+ CD45RO+ T cell memory	cell type	normal	GSM772963	GSM772881	GSM663126, GSM663130
BI_CD4_Memory_Primary_8pool	Blood	CD4+ CD45RO+ T cell memory	cell type	normal	GSM772997	GSM772930
BI_CD4_Naive_Primary_7pool	Blood	CD4+ CD45RA+ T cell naive	cell type	normal	GSM772934	GSM772876	GSM663129, GSM663133
BI_CD4_Naive_Primary_8pool	Blood	CD4+ CD45RA+ T cell naive	cell type	normal	GSM772835	GSM772916
BI_CD4p_CD25int_CD127p_Tmem	Blood	CD4+ CD25int CD127+ T cell	cell type	normal	GSM916026	GSM772953
BI_CD4p_CD25-_CD45RAp_Naive	Blood	CD4+ CD25- CD45RA + T cell naive	cell type	normal	GSM773004	GSM772920
BI_CD4p_CD25-_CD45ROp_Memory	Blood	CD4+ CD25- CD45RO+ T cell memory	cell type	normal	GSM772859	GSM772999
BI_CD4p_CD25-_Il17-_PMAstim_Th	Blood	CD4+ CD25- IL17- Th cell	cell type	normal	GSM772905	GSM772904
BI_CD4p_CD25-_Il17p_PMAstim_Th17	Blood	CD4+ CD25- IL17+ Th17 cell	cell type	normal	GSM772987	GSM772988
BI_CD8_Memory_7pool	Blood	CD8+ CD45RO+ T cell memory	cell type	normal	GSM772880	GSM772874	GSM1209561, GSM1209561
BI_CD8_Naive_7pool	Blood	CD8+ CD45RA+ T cell naive	cell type	normal	GSM772949	GSM772854
BI_CD8_Naive_8pool	Blood	CD8+ CD45RA+ T cell naive	cell type	normal	GSM772976	GSM773034
BI_Duodenum_Smooth_Muscle	Small intestine		tissue	normal	GSM772908	GSM772910
BI_Skeletal_Muscle	Skeletal muscle		tissue	normal	GSM916064	GSM621641
BI_Stomach_Smooth_Muscle	Stomach	Smooth muscle	tissue	normal	GSM916065	GSM772883
CD14	Blood	CD14+ Monocyte	cell type	normal	GSM1003559	GSM1003475
CD19_Primary	Blood	CD19+ B cell	cell type	normal	GSM1027287	GSM1027304	GSM432521, GSM432522, GSM432523, GSM432524
CD20	Blood	CD20+ B cell	cell type	normal	GSM1003459	GSM1003477	GSM432521, GSM432522, GSM432523, GSM432524
CD3	Blood	CD3+ T cell	cell type	normal	GSM1058764	GSM1058789
CD34_adult	Blood	HSC HSP derived	cell type	normal	GSM908051	GSM908073
CD34_fetal	Fetal blood	HSC HSP derived from fetal liver	cell type	fetal	GSM908050	GSM908072
CD56	Blood	CD56+ NK cell	cell type	normal	GSM1027288	GSM1027305
CD8_primiary	Blood	CD8+ T cell	cell type	normal	GSM1102781	GSM1102806	GSM1209581, GSM1209582, GSM1209583, GSM1209584
Colon_Crypt_1	Colon	Colon crypt	tissue	normal	GSM883685	GSM883676
Colon_Crypt_2	Colon	Colon crypt	tissue	normal	GSM883686	GSM883677
Colon_Crypt_3	Colon	Colon crypt	tissue	normal	GSM883687	GSM883678
DND41	Blood cancer	T cell leukemia	cell line	cancer	GSM1003462	GSM1003558
Fetal_Intestine	Fetal small intestine		tissue	fetal	GSM1058766	GSM1058787
Fetal_Intestine_Large	Fetal large intestine		tissue	fetal	GSM1058765	GSM1058786
Fetal_Muscle	Fetal muscle		tissue	fetal	GSM1058767	GSM1058788
Fetal_Thymus	Fetal thymus		tissue	fetal	GSM1027289	GSM1036258
GM12878	Blood cancer	Lymphoblastoid	cell line	cancer	GSM733771	GSM733742
H1	human ESC		cell line	embryionic stem	GSM466732	GSM605333
H2171	Lung cancer		cell line	cancer	GSM894067	GSM894092
HCC1954	Breast cancer		cell line	cancer	GSM721136	GSM721139
HCT-116	Colrectal cancer		cell line	cancer	GSM945853	GSM749774
HeLa	Cervical cancer		cell line	cancer	GSM733684	GSM733659
HepG2	Liver cancer		cell line	cancer	GSM733743	GSM733732
HMEC	Mammary epithelial		cell type	normal	GSM733660	GSM733668
HSMMtube	Skeletal muscle	Myotubes	tissue	normal	GSM733666	GSM733648
HUVEC	Umbilical vein	Endothelial	cell type	normal	GSM733691	GSM733715
IMR90	Fetal Lung	Fibroblast	cell line	fetal	GSM469966	GSM521926
Jurkat	Blood cancer	T cell leukemia	cell line	cancer	GSM1296384
K562	Blood cancer	Chronic Myelogenous Leukemia	cell line	cancer	GSM733656	GSM733780
LnCAP	Prostate cancer		cell line	cancer	GSM686937	GSM686947
MCF-7	Breast cancer		cell line	cancer	GSM946850	GSM945859
MM1S	Blood cancer	Multiple myeloma	cell line	cancer	GSM894083	GSM894087
NHDF_Ad	Skin	Fibroblast	cell type	normal	GSM733662	GSM733750
NHLF	Lung	Fibroblast	cell line	normal	GSM733646	GSM945280
Osteoblasts	Bone	Osteoblast	tissue	normal	GSM733739	GSM733697
Panc1	Pancreatic cancer		cell line	cancer	GSM818826	GSM818828
RPMI-8402	Blood cancer	T cell leukemia	cell line	cancer	GSM1246865
Skeletal_Muscle_Myoblast	Skeletal muscle	Myoblasts	tissue	normal	GSM733755	GSM733663	GSM175882, GSM175883, GSM175884
u87	Brain cancer	Glioblastoma	cell line	cancer	GSM894065	GSM894096
UCSD_Adrenal_Gland	Adrenal gland		tissue	normal	GSM1013126,GSM896163	GSM1013168,GSM896167
UCSD_Aorta	Aorta		tissue	normal	GSM906392	GSM1013169
UCSD_Bladder	Bladder		tissue	normal	GSM1013133	GSM1059457,GSM906414
UCSD_Esophagus	Esophagus		tissue	normal	GSM1013127,GSM906393	GSM906415	GSM176389, GSM176390, GSM176391
UCSD_Gastric	Stomach		tissue	normal	GSM1013122,GSM1013128,GSM910555	GSM956032,GSM1013164,GSM1013170	GSM114528, GSM114529, GSM114530, GSM114531, GSM114532, GSM114533, GSM114534, GSM114535
UCSD_Left_Ventricle	Heart		tissue	normal	GSM908951,GSM906396	GSM908968,GSM906418	GSM175817, GSM175818, GSM175819
UCSD_Lung	Lung		tissue	normal	GSM1013123,GSM906395	GSM956031,GSM1013165,GSM906417	GSM176012, GSM175977, GSM176021
UCSD_Ovary	Ovary		tissue	normal	GSM956009	GSM1013171	GSM175789, GSM176131, GSM176136, GSM176318
UCSD_Pancreas	Pancreas		tissue	normal	GSM1013129,GSM906397	GSM1013172,GSM906419
UCSD_Psoas	Skeletal muscle		tissue	normal	GSM1013130,GSM910556	GSM1013173,GSM906420
UCSD_Right_Atrium	Heart		tissue	normal	GSM910557	GSM906421
UCSD_Right_Ventricle	Heart		tissue	normal	GSM1013124	GSM1013167,GSM915338
UCSD_Sigmoid_Colon	Colon		tissue	normal	GSM915331,GSM910559	GSM906422
UCSD_Small_Intestine	Small intestine		tissue	normal	GSM1013131	GSM1120365	GSM175908, GSM175947
UCSD_Spleen	Spleen		tissue	normal	GSM1013132,GSM906398	GSM1013174,GSM906423
UCSD_Thymus	Thymus		tissue	normal	GSM1013125	GSM956030
VACO_400	Colrectal cancer		cell line	cancer	GSM883684	GSM883666
VACO_503	Colrectal cancer		cell line	cancer	GSM883682	GSM883671
VACO_9m	Colrectal cancer		cell line	cancer	GSM883683	GSM883674
