# Supplementary material for: Models of human core transcriptional regulatory circuitries
Source: HighWire-hosted journal article supplement (doi:10.1101/gr.197590.115), 2016-02-03
Supplement: Table_S2.xlsx [file Table_S2.xlsx]

## Sheet: List of Vertebrate TFs
List of vertebrate TFs
ADNP
ADNP2
AEBP2
AFF3
AHR
AIRE
ALX1
ALX3
ALX4
AR
ARGFX
ARID1A
ARID1B
ARID3A
ARID5B
ARNT
ARNT2
ARNTL
ARNTL2
ARX
ASCL1
ASCL2
ASCL3
ASCL4
ATF1
ATF2
ATF3
ATF4
ATF5
ATF6
ATF6B
ATF7
ATOH1
ATOH7
BACH1
BACH2
BARHL1
BARHL2
BARX1
BARX2
BATF
BATF2
BATF3
BBX
BCL11A
BCL11B
BCL6
BCL6B
BCLAF1
BHLHA15
BHLHE22
BHLHE23
BHLHE40
BHLHE41
BNC2
CAMTA1
CAMTA2
CBFB
CDC5L
CDX1
CDX2
CDX4
CEBPA
CEBPB
CEBPD
CEBPE
CEBPG
CERS3
CIC
CLOCK
CREB1
CREB3
CREB3L1
CREB3L2
CREB3L3
CREB3L4
CREB5
CREBL2
CREM
CRX
CUX2
DBP
DBX2
DDIT3
DEAF1
DLX1
DLX2
DLX3
DLX4
DLX5
DLX6
DMBX1
DMRT1
DMRT2
DMRT3
DMRTA1
DMRTA2
DMRTB1
DMRTC2
DMTF1
DPRX
DRGX
E2F1
E2F2
E2F3
E2F4
E2F5
E2F6
E2F7
E2F8
E4F1
EAF2
EBF1
EBF2
EBF3
EBF4
EGR1
EGR2
EGR3
EGR4
EHF
ELF1
ELF2
ELF3
ELF4
ELF5
ELK1
ELK3
ELK4
EMX1
EMX2
EN1
EN2
EOMES
ERF
ERG
ESR1
ESR2
ESRRA
ESRRB
ESRRG
ESX1
ETS1
ETS2
ETV1
ETV2
ETV3
ETV4
ETV5
ETV6
ETV7
EVX1
EVX2
FEV
FEZF1
FEZF2
FIGLA
FIZ1
FLI1
FOS
FOSB
FOSL1
FOSL2
FOXA1
FOXA2
FOXA3
FOXB1
FOXB2
FOXC1
FOXC2
FOXD1
FOXD2
FOXD3
FOXD4
FOXD4L1
FOXD4L2
FOXD4L3
FOXD4L4
FOXD4L5
FOXD4L6
FOXE1
FOXE3
FOXF1
FOXF2
FOXG1
FOXH1
FOXI1
FOXI2
FOXJ1
FOXJ2
FOXJ3
FOXK1
FOXK2
FOXL1
FOXL2
FOXM1
FOXN1
FOXN2
FOXN3
FOXN4
FOXO1
FOXO3
FOXO4
FOXO6
FOXP1
FOXP2
FOXP3
FOXP4
FOXQ1
FOXR1
FOXR2
FOXS1
GABPA
GATA1
GATA2
GATA3
GATA4
GATA5
GATA6
GBX1
GBX2
GCM1
GCM2
GFI1
GFI1B
GLI1
GLI2
GLI3
GLIS1
GLIS2
GLIS3
GMEB1
GMEB2
GRHL1
GRHL2
GRHL3
GSC
GSC2
GSX1
GSX2
GZF1
HAND1
HAND2
HBP1
HDX
HES1
HES2
HES3
HES4
HES5
HES6
HES7
HESX1
HEY1
HEY2
HEYL
HHEX
HIC1
HIC2
HIF1A
HINFP
HIVEP1
HIVEP2
HIVEP3
HKR1
HLF
HLX
HMBOX1
HMX1
HMX2
HMX3
HNF1A
HNF1B
HNF4A
HNF4G
HOMEZ
HOPX
HOXA1
HOXA10
HOXA11
HOXA13
HOXA2
HOXA3
HOXA4
HOXA5
HOXA6
HOXA7
HOXA9
HOXB1
HOXB13
HOXB2
HOXB3
HOXB4
HOXB5
HOXB6
HOXB7
HOXB8
HOXB9
HOXC10
HOXC11
HOXC12
HOXC13
HOXC4
HOXC5
HOXC6
HOXC8
HOXC9
HOXD1
HOXD10
HOXD11
HOXD12
HOXD13
HOXD3
HOXD4
HOXD8
HOXD9
HSF1
HSF2
HSF4
HSF5
HSFX1
HSFX2
HSFY1
HSFY2
ID1
ID2
ID3
IKZF1
IKZF2
IKZF3
IKZF4
IKZF5
INSM1
INSM2
IRF1
IRF2
IRF3
IRF4
IRF5
IRF6
IRF7
IRF8
IRF9
IRX1
IRX2
IRX3
IRX4
IRX5
IRX6
ISL1
ISL2
ISX
JDP2
JUN
JUNB
JUND
KLF1
KLF10
KLF11
KLF12
KLF13
KLF14
KLF15
KLF16
KLF17
KLF2
KLF3
KLF4
KLF5
KLF6
KLF7
KLF8
KLF9
LBX1
LBX2
LCOR
LCORL
LEF1
LEUTX
LHX1
LHX2
LHX3
LHX4
LHX5
LHX6
LHX8
LHX9
LIN28A
LIN28B
LMX1A
LMX1B
LYL1
MAF
MAFA
MAFB
MAFF
MAFG
MAFK
MAX
MAZ
MECOM
MEF2A
MEF2B
MEF2C
MEF2D
MEIS1
MEIS2
MEIS3
MEOX1
MEOX2
MESP2
MGA
MIER3
MITF
MIXL1
MKX
MLX
MLXIP
MNT
MNX1
MSC
MSX1
MSX2
MTF1
MXD1
MXD3
MXD4
MXI1
MYB
MYBL1
MYBL2
MYC
MYCL
MYCN
MYF5
MYF6
MYNN
MYOD1
MYOG
MYT1
MYT1L
MZF1
NANOG
NEUROD1
NEUROD2
NEUROD4
NEUROD6
NEUROG1
NEUROG2
NEUROG3
NFAT5
NFATC1
NFATC2
NFATC3
NFATC4
NFE2
NFE2L1
NFE2L2
NFE2L3
NFIA
NFIB
NFIC
NFIL3
NFIX
NFKB1
NFKB2
NFX1
NFXL1
NFYA
NFYB
NFYC
NHLH1
NHLH2
NKX1-1
NKX2-1
NKX2-2
NKX2-3
NKX2-4
NKX2-5
NKX2-6
NKX2-8
NKX3-1
NKX3-2
NKX6-1
NKX6-2
NKX6-3
NOBOX
NOTO
NPAS1
NPAS2
NPAS3
NPAS4
NR0B1
NR1D1
NR1D2
NR1H2
NR1H3
NR1H4
NR1I2
NR1I3
NR2C1
NR2C2
NR2E1
NR2E3
NR2F1
NR2F2
NR2F6
NR3C1
NR3C2
NR4A1
NR4A2
NR4A3
NR5A1
NR5A2
NR6A1
NRF1
NRL
OLIG1
OLIG2
OLIG3
ONECUT1
ONECUT2
ONECUT3
OSR1
OSR2
OTP
OTX1
OTX2
OVOL1
OVOL2
OVOL3
PATZ1
PAX1
PAX2
PAX3
PAX4
PAX5
PAX6
PAX7
PAX8
PAX9
PBX1
PBX2
PBX3
PBX4
PDX1
PEG3
PGR
PHOX2A
PHOX2B
PINX1
PITX1
PITX2
PITX3
PKNOX1
PKNOX2
PLAG1
PLAGL1
PLAGL2
POU1F1
POU2F1
POU2F2
POU2F3
POU3F1
POU3F2
POU3F3
POU3F4
POU4F1
POU4F2
POU4F3
POU5F1
POU6F1
POU6F2
PPARA
PPARD
PPARG
PRDM1
PRDM10
PRDM12
PRDM13
PRDM14
PRDM15
PRDM16
PRDM2
PRDM4
PRDM5
PRDM6
PRDM8
PRDM9
PREB
PROP1
PROX1
PROX2
PRRX1
PRRX2
PTF1A
RARA
RARB
RARG
RAX
RAX2
RBAK
RBPJ
RBPJL
RCOR1
RCOR2
RCOR3
REL
RELA
RELB
RERE
REST
RFX1
RFX2
RFX3
RFX4
RFX5
RFX7
RFX8
RHOXF1
RHOXF2
RORA
RORB
RORC
RREB1
RUNX1
RUNX2
RUNX3
RXRA
RXRB
RXRG
SALL1
SALL2
SALL4
SATB1
SATB2
SCRT1
SCRT2
SCXA
SCXB
SEBOX
SHOX
SHOX2
SIM1
SIX1
SIX2
SIX3
SIX4
SIX5
SIX6
SMAD1
SMAD2
SMAD3
SMAD4
SMAD5
SMAD9
SNAI1
SNAI2
SNAI3
SNAPC4
SOHLH1
SOHLH2
SOX1
SOX10
SOX11
SOX12
SOX13
SOX14
SOX15
SOX17
SOX18
SOX2
SOX21
SOX3
SOX30
SOX4
SOX5
SOX6
SOX7
SOX8
SOX9
SP1
SP110
SP140L
SP2
SP3
SP4
SP5
SP6
SP7
SP8
SP9
SPDEF
SPI1
SPIB
SPIC
SPZ1
SREBF1
SREBF2
SRF
SRY
ST18
STAT1
STAT2
STAT3
STAT4
STAT5A
STAT5B
STAT6
T
TAL1
TAL2
TBR1
TBX1
TBX10
TBX15
TBX18
TBX19
TBX2
TBX20
TBX21
TBX22
TBX3
TBX4
TBX5
TBX6
TCF12
TCF15
TCF21
TCF3
TCF4
TCF7
TCF7L1
TCF7L2
TCFL5
TEAD1
TEAD2
TEAD3
TEAD4
TEF
TFAM
TFAP2A
TFAP2B
TFAP2C
TFAP2D
TFAP2E
TFAP4
TFCP2
TFCP2L1
TFDP1
TFDP2
TFDP3
TFE3
TFEB
TFEC
TGIF1
TGIF2LX
TGIF2LY
THAP11
THRA
THRB
TLX1
TLX2
TLX3
TOX2
TOX3
TP53
TP63
TP73
TRERF1
TRPS1
TSC22D1
TSC22D2
TSC22D3
TSC22D4
TSHZ1
TSHZ3
TUB
TWIST1
TWIST2
UBP1
UBTF
UNCX
USF1
USF2
VAX1
VAX2
VDR
VENTX
VEZF1
VSX1
VSX2
WHSC1
WIZ
WT1
XBP1
YBX1
YBX3
YY1
ZBED1
ZBED4
ZBTB1
ZBTB10
ZBTB11
ZBTB12
ZBTB14
ZBTB16
ZBTB17
ZBTB18
ZBTB2
ZBTB20
ZBTB21
ZBTB24
ZBTB25
ZBTB26
ZBTB3
ZBTB32
ZBTB33
ZBTB34
ZBTB37
ZBTB38
ZBTB4
ZBTB40
ZBTB41
ZBTB43
ZBTB44
ZBTB45
ZBTB46
ZBTB47
ZBTB48
ZBTB49
ZBTB6
ZBTB7A
ZBTB7B
ZBTB7C
ZBTB8A
ZEB1
ZEB2
ZFAT
ZFHX2
ZFHX3
ZFHX4
ZFP1
ZFP14
ZFP2
ZFP28
ZFP3
ZFP30
ZFP37
ZFP41
ZFP42
ZFP57
ZFP62
ZFP64
ZFP69
ZFP69B
ZFP91
ZFPM1
ZFPM2
ZFX
ZFY
ZGLP1
ZHX1
ZHX2
ZHX3
ZIC1
ZIC2
ZIC3
ZIC4
ZIC5
ZIK1
ZIM3
ZKSCAN1
ZKSCAN2
ZKSCAN3
ZKSCAN4
ZKSCAN5
ZKSCAN7
ZKSCAN8
ZNF100
ZNF101
ZNF107
ZNF112
ZNF114
ZNF117
ZNF12
ZNF121
ZNF131
ZNF132
ZNF133
ZNF134
ZNF135
ZNF136
ZNF138
ZNF14
ZNF140
ZNF141
ZNF142
ZNF143
ZNF146
ZNF148
ZNF155
ZNF157
ZNF16
ZNF160
ZNF165
ZNF169
ZNF17
ZNF174
ZNF175
ZNF18
ZNF180
ZNF181
ZNF182
ZNF184
ZNF189
ZNF19
ZNF195
ZNF197
ZNF2
ZNF20
ZNF200
ZNF202
ZNF205
ZNF208
ZNF211
ZNF212
ZNF213
ZNF214
ZNF215
ZNF217
ZNF219
ZNF22
ZNF221
ZNF222
ZNF223
ZNF226
ZNF227
ZNF229
ZNF23
ZNF230
ZNF232
ZNF233
ZNF235
ZNF236
ZNF239
ZNF24
ZNF248
ZNF25
ZNF250
ZNF251
ZNF254
ZNF256
ZNF257
ZNF26
ZNF263
ZNF264
ZNF266
ZNF267
ZNF268
ZNF273
ZNF274
ZNF275
ZNF276
ZNF28
ZNF280D
ZNF281
ZNF282
ZNF284
ZNF286A
ZNF287
ZNF292
ZNF296
ZNF3
ZNF30
ZNF300
ZNF302
ZNF304
ZNF311
ZNF317
ZNF319
ZNF32
ZNF320
ZNF322
ZNF324
ZNF329
ZNF331
ZNF333
ZNF334
ZNF335
ZNF337
ZNF33A
ZNF33B
ZNF34
ZNF341
ZNF343
ZNF347
ZNF35
ZNF354A
ZNF354B
ZNF354C
ZNF358
ZNF366
ZNF37A
ZNF382
ZNF383
ZNF384
ZNF394
ZNF396
ZNF397
ZNF398
ZNF404
ZNF407
ZNF408
ZNF41
ZNF410
ZNF415
ZNF416
ZNF417
ZNF418
ZNF419
ZNF420
ZNF423
ZNF425
ZNF426
ZNF43
ZNF430
ZNF431
ZNF433
ZNF436
ZNF439
ZNF44
ZNF440
ZNF441
ZNF442
ZNF443
ZNF444
ZNF445
ZNF446
ZNF449
ZNF45
ZNF451
ZNF454
ZNF460
ZNF461
ZNF467
ZNF468
ZNF470
ZNF471
ZNF473
ZNF479
ZNF48
ZNF480
ZNF483
ZNF484
ZNF485
ZNF490
ZNF491
ZNF493
ZNF496
ZNF497
ZNF500
ZNF501
ZNF502
ZNF506
ZNF507
ZNF510
ZNF513
ZNF514
ZNF516
ZNF517
ZNF519
ZNF521
ZNF524
ZNF526
ZNF527
ZNF529
ZNF530
ZNF532
ZNF536
ZNF540
ZNF541
ZNF543
ZNF544
ZNF546
ZNF547
ZNF548
ZNF549
ZNF551
ZNF552
ZNF554
ZNF555
ZNF556
ZNF557
ZNF558
ZNF559
ZNF559-ZNF177
ZNF560
ZNF561
ZNF562
ZNF563
ZNF565
ZNF566
ZNF567
ZNF568
ZNF569
ZNF57
ZNF570
ZNF571
ZNF572
ZNF573
ZNF574
ZNF575
ZNF576
ZNF577
ZNF579
ZNF580
ZNF581
ZNF582
ZNF583
ZNF584
ZNF585A
ZNF586
ZNF587
ZNF589
ZNF596
ZNF597
ZNF599
ZNF600
ZNF605
ZNF606
ZNF607
ZNF610
ZNF611
ZNF613
ZNF614
ZNF615
ZNF616
ZNF619
ZNF620
ZNF621
ZNF623
ZNF624
ZNF625
ZNF626
ZNF627
ZNF628
ZNF629
ZNF639
ZNF641
ZNF644
ZNF646
ZNF648
ZNF649
ZNF652
ZNF653
ZNF655
ZNF658
ZNF658B
ZNF66
ZNF660
ZNF662
ZNF664
ZNF665
ZNF667
ZNF668
ZNF669
ZNF670
ZNF671
ZNF672
ZNF675
ZNF677
ZNF678
ZNF679
ZNF680
ZNF681
ZNF682
ZNF683
ZNF684
ZNF687
ZNF689
ZNF69
ZNF691
ZNF692
ZNF695
ZNF696
ZNF697
ZNF699
ZNF7
ZNF70
ZNF700
ZNF701
ZNF705A
ZNF705D
ZNF705E
ZNF705G
ZNF707
ZNF708
ZNF709
ZNF71
ZNF710
ZNF711
ZNF713
ZNF714
ZNF721
ZNF726
ZNF729
ZNF730
ZNF74
ZNF740
ZNF746
ZNF749
ZNF75A
ZNF75D
ZNF76
ZNF765
ZNF77
ZNF771
ZNF777
ZNF783
ZNF785
ZNF79
ZNF8
ZNF80
ZNF81
ZNF823
ZNF83
ZNF84
ZNF85
ZNF90
ZNF91
ZNF92
ZNF93
ZNF99
ZSCAN1
ZSCAN10
ZSCAN12
ZSCAN16
ZSCAN18
ZSCAN2
ZSCAN20
ZSCAN21
ZSCAN22
ZSCAN23
ZSCAN25
ZSCAN29
ZSCAN4
ZSCAN5A
ZSCAN9
ZXDA
ZXDB
ZXDC
ZZZ3

## Sheet: Motifs and associated TFs
Motif name	Transcription Factor official gene symbol
Transfac.V$ZIC2_01	ZIC2
Transfac.V$DBP_Q6	DBP
Transfac.V$ZIC2_04	ZIC2
Transfac.V$ZIC2_05	ZIC2
Transfac.V$MAX_08	MAX
Transfac.V$HOXB7_01	HOXB7
Transfac.V$MAX_01	MAX
Transfac.V$MAX_07	MAX
Transfac.V$MAX_04	MAX
Transfac.V$SRY_01	SRY
Transfac.V$GFI1_01	GFI1
Transfac.V$SRY_02	SRY
Transfac.V$SRY_05	SRY
Transfac.V$SRY_07	SRY
Transfac.V$RHOXF1_02	RHOXF1
Transfac.V$SRY_08	SRY
Transfac.V$RHOXF1_01	RHOXF1
Transfac.V$FOXD2_01	FOXD2
Transfac.V$FOXD2_02	FOXD2
Transfac.V$DMRT3_01	DMRT3
Transfac.V$USF2_Q6	USF2
Transfac.V$POU4F2_01	POU4F2
Transfac.V$TEAD1_04	TEAD1
Transfac.V$TEAD1_03	TEAD1
Transfac.V$ZNF232_01	ZNF232
Transfac.V$TBP_Q6_01	TBP
Transfac.V$PR_01	ERVK-10
Transfac.V$PR_02	ERVK-10
Transfac.V$BRACH_02	T
Transfac.V$HOXB6_01	HOXB6
Transfac.V$STAT4_Q4	STAT4
Transfac.V$STAT4_Q5	STAT4
Transfac.V$EGR4_01	EGR4
Transfac.V$TCF1_Q5	TCF7
Transfac.V$CFOS_Q6	FOS
Transfac.V$TFCP2_02	TFCP2
Transfac.V$TFCP2_03	TFCP2
Transfac.V$DEC1_Q2	2015-12-01
Transfac.V$E12_Q6	ELSPBP1
Transfac.V$POU1F1_Q6	POU1F1
Transfac.V$REX1_03	ZFP42
Transfac.V$E2F1_Q3_01	E2F1
Transfac.V$HMX2_02	HMX2
Transfac.V$ZBRK1_01	ZNF350
Transfac.V$FOXD3_05	FOXD3
Transfac.V$FOXD3_04	FOXD3
Transfac.V$FOXD3_01	FOXD3
Transfac.V$E2F3_02	E2F3
Transfac.V$E2F3_03	E2F3
Transfac.V$E2F3_04	E2F3
Transfac.V$E2F3_05	E2F3
Transfac.V$CETS2_01	ETS2
Transfac.V$SOX2_04	SOX2
Transfac.V$SOX2_05	SOX2
Transfac.V$SOX2_01	SOX2
Transfac.V$SOX2_03	SOX2
Transfac.V$TEAD3_01	TEAD3
Transfac.V$TEAD3_02	TEAD3
Transfac.V$NFKB_C	NFKB1
Transfac.V$SRY_09	SRY
Transfac.V$TCF11_01	NFE2L1
Transfac.V$LHX3_Q3	LHX3
Transfac.V$E2F1_04	E2F1
Transfac.V$E2F1_05	E2F1
Transfac.V$E2F1_02	E2F1
Transfac.V$ETS1_03	ETS1
Transfac.V$ETS1_02	ETS1
Transfac.V$FXRIR1_Q6	NR1H4
Transfac.V$OTX1_Q5	OTX1
Transfac.V$FOXM1_01	FOXM1
Transfac.V$OCT4_02	POU5F1
Transfac.V$SMAD3_Q6_01	SMAD3
Transfac.V$OCT4_01	POU5F1
Transfac.V$ISRE_01	STAT2
Transfac.V$ER_Q6_02	ESR1
Transfac.V$ZFP105_03	ZNF35
Transfac.V$NFKB_Q6	NFKB1
Transfac.V$ZFP105_04	ZNF35
Transfac.V$DLX1_03	DLX1
Transfac.V$DLX1_04	DLX1
Transfac.V$HOXC10_03	HOXC10
Transfac.V$HOXC10_01	HOXC10
Transfac.V$HOXC10_07	HOXC10
Transfac.V$HOXC10_06	HOXC10
Transfac.V$HOXC10_05	HOXC10
Transfac.V$HOXC10_04	HOXC10
Transfac.V$PNR_01	NR2E3
Transfac.V$HNF1_Q6	HNF1A
Transfac.V$PMX2B_01	PHOX2B
Transfac.V$MZF1_02	MZF1
Transfac.V$MZF1_01	MZF1
Transfac.V$GSX2_02	GSX2
Transfac.V$HEB_Q6	TCF12
Transfac.V$GMEB2_04	GMEB2
Transfac.V$ATF5_01	ATF5
Transfac.V$GMEB2_02	GMEB2
Transfac.V$GMEB2_03	GMEB2
Transfac.V$LTF_Q6	LTF
Transfac.V$REST_01	REST
Transfac.V$KLF12_02	KLF12
Transfac.V$SRF_Q6	SRF
Transfac.V$BHLHE41_01	BHLHE41
Transfac.V$SRF_Q4	SRF
Transfac.V$FOXA2_02	FOXA2
Transfac.V$PLZF_02	ZBTB16
Transfac.V$E2F8_01	E2F8
Transfac.V$ERF_02	ERF
Transfac.V$ERF_03	ERF
Transfac.V$ERF_01	ERF
Transfac.V$MYF6_04	MYF6
Transfac.V$MYF6_05	MYF6
Transfac.V$MYF6_03	MYF6
Transfac.V$YY1_Q6	YY1
Transfac.V$BRN4_01	POU3F4
Transfac.V$HDX_01	HDX
Transfac.V$SOX4_03	SOX4
Transfac.V$SOX4_01	SOX4
Transfac.V$DLX2_03	DLX2
Transfac.V$DLX2_04	DLX2
Transfac.V$ERG_01	ERG
Transfac.V$PUR1_Q4	PURA
Transfac.V$ERG_03	ERG
Transfac.V$ERG_02	ERG
Transfac.V$ERG_05	ERG
Transfac.V$ERG_04	ERG
Transfac.V$GSX1_01	GSX1
Transfac.V$PIT1_Q6	SLC20A1
Transfac.V$HOXB4_01	HOXB4
Transfac.V$NFIB_01	NFIB
Transfac.V$CMAF_Q5	MAF
Transfac.V$NRL_01	NRL
Transfac.V$CDPCR1_01	CUX1
Transfac.V$RARG_02	RARG
Transfac.V$RARG_03	RARG
Transfac.V$RARG_01	RARG
Transfac.V$S8_01	RPS8
Transfac.V$S8_02	RPS8
Transfac.V$BEN_01	GTF2IRD1
Transfac.V$BEN_02	GTF2IRD1
Transfac.V$CDPCR3_01	CUX1
Transfac.V$RARA_03	RARA
Transfac.V$RARA_04	RARA
Transfac.V$EN1_07	EN1
Transfac.V$RARA_06	RARA
Transfac.V$RARA_07	RARA
Transfac.V$SMAD2_Q6	SMAD2
Transfac.V$NKX2B_Q3	NKX2-2
Transfac.V$TR4_Q2_01	NR2C2
Transfac.V$IRF4_03	IRF4
Transfac.V$CACD_01	CACD
Transfac.V$ONECUT3_01	ONECUT3
Transfac.V$POU3F1_Q6	POU3F1
Transfac.V$POU6F1_01	POU6F1
Transfac.V$POU6F1_03	POU6F1
Transfac.V$POU6F1_02	POU6F1
Transfac.V$GLI1_Q2	GLI1
Transfac.V$HB9_01	MNX1
Transfac.V$POU3F2_02	POU3F2
Transfac.V$POU3F2_01	POU3F2
Transfac.V$POU3F2_05	POU3F2
Transfac.V$POU3F2_04	POU3F2
Transfac.V$NFATC1_03	NFATC1
Transfac.V$NFATC1_02	NFATC1
Transfac.V$NFATC1_01	NFATC1
Transfac.V$NFAT5_02	NFAT5
Transfac.V$E2F4_Q6	E2F4
Transfac.V$CREL_01	REL
Transfac.V$AP2_Q6	TFAP2A
Transfac.V$NFIA_01	NFIA
Transfac.V$AP2_Q3	TFAP2A
Transfac.V$POU3F4_03	POU3F4
Transfac.V$POU3F4_02	POU3F4
Transfac.V$GFI1_Q6_01	GFI1
Transfac.V$PEA3_Q6_02	ETV4
Transfac.V$NR1B1_Q6	RARA
Transfac.V$THRB_01	THRB
Transfac.V$THRB_02	THRB
Transfac.V$THRB_03	THRB
Transfac.V$TCF7L2_04	TCF7L2
Transfac.V$HOXD8_03	HOXD8
Transfac.V$NFKB1_02	NFKB1
Transfac.V$IRF1_Q6_01	IRF1
Transfac.V$EGR1_06	EGR1
Transfac.V$PROP1_Q2	PROP1
Transfac.V$ONECUT2_01	ONECUT2
Transfac.V$NRF1_02	NRF1
Transfac.V$LHX8_01	LHX8
Transfac.V$LHX8_03	LHX8
Transfac.V$LHX8_04	LHX8
Transfac.V$LHX8_05	LHX8
Transfac.V$SNA_Q4	SNAI1
Transfac.V$YB1_Q4	YBX1
Transfac.V$PDX1_06	PDX1
Transfac.V$PDX1_05	PDX1
Transfac.V$ONECUT1_01	ONECUT1
Transfac.V$YB1_Q3	YBX1
Transfac.V$ZNF410_01	ZNF410
Transfac.V$RSRFC4_01	MEF2A
Transfac.V$TBP_Q6	TBP
Transfac.V$POU2F1_Q6	POU2F1
Transfac.V$ETF_Q6	TEAD2
Transfac.V$RAX2_01	RAX2
Transfac.V$FREAC2_01	FOXF2
Transfac.V$HNF1A_Q5	HNF1A
Transfac.V$SOX30_03	SOX30
Transfac.V$OCT2_01	POU2F2
Transfac.V$ZSCAN16_01	ZSCAN16
Transfac.V$STAT5A_04	STAT5A
Transfac.V$STAT5A_02	STAT5A
Transfac.V$STAT5A_03	STAT5A
Transfac.V$STAT5A_01	STAT5A
Transfac.V$MECP2_02	MECP2
Transfac.V$MECP2_01	MECP2
Transfac.V$ATF_B	PLAU
Transfac.V$HMEF2_Q6	MYEF2
Transfac.V$LMX1A_02	LMX1A
Transfac.V$DLX5_Q3	DLX5
Transfac.V$IRF1_Q6	IRF1
Transfac.V$P53_01	TP53
Transfac.V$P53_03	TP53
Transfac.V$P53_02	TP53
Transfac.V$P53_05	TP53
Transfac.V$P53_04	TP53
Transfac.V$POU3F3_01	POU3F3
Transfac.V$HSF1_01	HSF1
Transfac.V$HSF1_02	HSF1
Transfac.V$MOX1_01	NOX1
Transfac.V$HFH4_01	FOXJ1
Transfac.V$PRRX1_02	PRRX1
Transfac.V$PRRX1_03	PRRX1
Transfac.V$ETV3_02	ETV3
Transfac.V$EGR3_02	EGR3
Transfac.V$EGR3_01	EGR3
Transfac.V$ETV3_01	ETV3
Transfac.V$GCMB_Q2	GCM2
Transfac.V$TBX2_Q2	TBX2
Transfac.V$RXRA_05	RXRA
Transfac.V$RXRA_04	RXRA
Transfac.V$SRF_02	SRF
Transfac.V$DLX6_01	DLX6
Transfac.V$CEBPG_01	CEBPG
Transfac.V$ETV5_01	ETV5
Transfac.V$KLF15_Q2	KLF15
Transfac.V$RARB_01	RARB
Transfac.V$PIT1_Q6_01	SLC20A1
Transfac.V$SP3_Q3	SP3
Transfac.V$ZBTB49_01	ZBTB49
Transfac.V$HSF2_04	HSF2
Transfac.V$ATF7_01	ATF7
Transfac.V$HSF2_01	HSF2
Transfac.V$ATF_01	PLAU
Transfac.V$HSF2_02	HSF2
Transfac.V$SPIB_01	SPIB
Transfac.V$SPIB_02	SPIB
Transfac.V$SPIB_03	SPIB
Transfac.V$SPIB_06	SPIB
Transfac.V$ETV7_01	ETV7
Transfac.V$SRY_Q6	SRY
Transfac.V$RFX1_02	RFX1
Transfac.V$RFX1_01	RFX1
Transfac.V$TFEC_01	TFEC
Transfac.V$SP1_Q6	SP1
Transfac.V$SOX9_02	SOX9
Transfac.V$SOX9_05	SOX9
Transfac.V$SOX9_04	SOX9
Transfac.V$SOX9_07	SOX9
Transfac.V$HOXA11_03	HOXA11
Transfac.V$ESX1_03	ESX1
Transfac.V$SOX9_08	SOX9
Transfac.V$ESX1_01	ESX1
Transfac.V$ATF1_03	ATF1
Transfac.V$ATF1_04	ATF1
Transfac.V$EN2_03	EN2
Transfac.V$AP1_C	JUND
Transfac.V$ER71_01	ETV2
Transfac.V$AP2REP_01	KLF12
Transfac.V$BARHL1_04	BARHL1
Transfac.V$BARHL1_05	BARHL1
Transfac.V$BARHL1_03	BARHL1
Transfac.V$SNAI2_01	SNAI2
Transfac.V$EN1_08	EN1
Transfac.V$OG2_01	NOBOX
Transfac.V$OG2_02	NOBOX
Transfac.V$VDR_Q3	VDR
Transfac.V$MAFB_03	MAFB
Transfac.V$MAFB_01	MAFB
Transfac.V$MAFB_06	MAFB
Transfac.V$MAFB_07	MAFB
Transfac.V$ESRRA_06	ESRRA
Transfac.V$MAFB_05	MAFB
Transfac.V$ESRRA_08	ESRRA
Transfac.V$ESRRA_09	ESRRA
Transfac.V$CREM_Q6	CREM
Transfac.V$NRSF_Q4	REST
Transfac.V$LMO2COM_02	LMO2
Transfac.V$LMO2COM_01	LMO2
Transfac.V$LMX1B_01	LMX1B
Transfac.V$LMX1B_03	LMX1B
Transfac.V$NR2F1_03	NR2F1
Transfac.V$TBR2_01	EOMES
Transfac.V$NHLH1_02	NHLH1
Transfac.V$PAX6_02	PAX6
Transfac.V$PBX1_Q3	PBX1
Transfac.V$RFX3_05	RFX3
Transfac.V$RFX3_04	RFX3
Transfac.V$RFX3_07	RFX3
Transfac.V$RFX3_06	RFX3
Transfac.V$RFX3_08	RFX3
Transfac.V$STAT1_Q6	STAT1
Transfac.V$NFKAPPAB50_01	NFKB1
Transfac.V$NUR77_Q5	NR4A1
Transfac.V$CDX2_03	CDX2
Transfac.V$RFX5_02	RFX5
Transfac.V$RFX5_01	RFX5
Transfac.V$HSFY1_01	HSFY1
Transfac.V$HSFY1_02	HSFY1
Transfac.V$HSFY1_03	HSFY1
Transfac.V$GFI1B_Q6	GFI1B
Transfac.V$TBX20_02	TBX20
Transfac.V$TBX20_01	TBX20
Transfac.V$NKX28_01	NKX2-8
Transfac.V$NKX62_01	NKX6-2
Transfac.V$LHX4_01	LHX4
Transfac.V$LHX4_03	LHX4
Transfac.V$ZBTB12_03	ZBTB12
Transfac.V$ZBTB12_04	ZBTB12
Transfac.V$IRX5_01	IRX5
Transfac.V$IRX5_03	IRX5
Transfac.V$ESR1_01	ESR1
Transfac.V$BTEB2_Q3	KLF5
Transfac.V$ESR1_03	ESR1
Transfac.V$E2F3_Q6	E2F3
Transfac.V$MEF2B_01	MEF2B
Transfac.V$HMBOX1_01	HMBOX1
Transfac.V$HMBOX1_03	HMBOX1
Transfac.V$ZF5_B	ZBTB14
Transfac.V$EGR1_04	EGR1
Transfac.V$EGR1_07	EGR1
Transfac.V$CTF1_01	CTF1
Transfac.V$EGR1_08	EGR1
Transfac.V$LHX5_01	LHX5
Transfac.V$ERR1_Q2_01	ESRRA
Transfac.V$PLAGL1_03	PLAGL1
Transfac.V$PLAGL1_04	PLAGL1
Transfac.V$SRF_01	SRF
Transfac.V$HNF3A_01	FOXA1
Transfac.V$SRF_03	SRF
Transfac.V$SRF_06	SRF
Transfac.V$SRF_07	SRF
Transfac.V$CNOT3_01	CNOT3
Transfac.V$CHREBP_Q6	MLXIPL
Transfac.V$OTX2_Q3	OTX2
Transfac.V$RXRB_01	RXRB
Transfac.V$AML2_01	RUNX3
Transfac.V$E2F1_01	E2F1
Transfac.V$SMAD3_Q6	SMAD3
Transfac.V$HNF4DR1_Q3	HNF4A
Transfac.V$ZBTB7C_01	ZBTB7C
Transfac.V$ZNF515_01	GLIS3
Transfac.V$ZF5_01	ZBTB14
Transfac.V$NKX25_Q5	NKX2-5
Transfac.V$GATA5_05	GATA5
Transfac.V$GATA5_04	GATA5
Transfac.V$NKX22_02	NKX2-2
Transfac.V$SMAD5_Q5	SMAD5
Transfac.V$NKX22_01	NKX2-2
Transfac.V$ER81_01	ETV1
Transfac.V$ER81_02	ETV1
Transfac.V$HSF_Q6	HSF5
Transfac.V$FAC1_01	BPTF
Transfac.V$NEUROG2_01	NEUROG2
Transfac.V$NKX24_01	NKX2-4
Transfac.V$HEY2_01	HEY2
Transfac.V$IRX3_05	IRX3
Transfac.V$IRX3_02	IRX6
Transfac.V$IRX3_01	IRX6
Transfac.V$LEF1_Q5_01	LEF1
Transfac.V$LBP9_01	TFCP2L1
Transfac.V$TR4_03	NR2C2
Transfac.V$TR4_01	NR2C2
Transfac.V$PR_Q6	ERVK-10
Transfac.V$HEY1_01	HEY1
Transfac.V$OCTAMER_01	POU3F3
Transfac.V$MAFF_01	MAFF
Transfac.V$LHX3_01	LHX3
Transfac.V$IRX2_01	IRX2
Transfac.V$MAX_Q6	MAX
Transfac.V$IRX2_03	IRX2
Transfac.V$GATA3_07	GATA3
Transfac.V$GATA3_05	GATA3
Transfac.V$MYBL1_08	MYBL1
Transfac.V$MYBL1_04	MYBL1
Transfac.V$MYBL1_05	MYBL1
Transfac.V$MYBL1_06	MYBL1
Transfac.V$MYBL1_07	MYBL1
Transfac.V$HMGIY_01	HMGA1
Transfac.V$PPARG_Q6	PPARG
Transfac.V$MYBL1_03	MYBL1
Transfac.V$HOXA10_Q5	HOXA10
Transfac.V$E2F7_01	E2F7
Transfac.V$GATA1_05	GATA1
Transfac.V$GATA1_04	GATA1
Transfac.V$GATA1_06	GATA1
Transfac.V$GATA1_01	GATA1
Transfac.V$GSH2_01	GSX2
Transfac.V$GATA1_03	GATA1
Transfac.V$GATA1_02	GATA1
Transfac.V$NFKAPPAB_01	NFKB1
Transfac.V$NKX26_01	NKX2-6
Transfac.V$SOX2_Q3	SOX2
Transfac.V$SOX2_Q6	SOX2
Transfac.V$PPARA_Q6	PPARA
Transfac.V$MYC_Q2	MYC
Transfac.V$SPI1_04	SPI1
Transfac.V$SPI1_06	SPI1
Transfac.V$SPI1_01	SPI1
Transfac.V$SPI1_03	SPI1
Transfac.V$SPI1_02	SPI1
Transfac.V$AP2ALPHA_Q6	TFAP2A
Transfac.V$ISX_04	ISX
Transfac.V$ISX_01	ISX
Transfac.V$ISX_03	ISX
Transfac.V$KLF3_Q3	KLF3
Transfac.V$FOXM1_Q3	FOXM1
Transfac.V$GSC2_01	GSC2
Transfac.V$CMYC_Q6_01	MYC
Transfac.V$PKNOX2_04	PKNOX2
Transfac.V$PKNOX2_03	PKNOX2
Transfac.V$PKNOX2_01	PKNOX2
Transfac.V$OTX1_04	OTX1
Transfac.V$POU3F1_03	POU3F1
Transfac.V$SRF_Q5_02	SRF
Transfac.V$SRF_Q5_01	SRF
Transfac.V$E2F4_03	E2F4
Transfac.V$E2F4_02	E2F4
Transfac.V$E2F4_04	E2F3
Transfac.V$BDP1_01	BDP1
Transfac.V$HINFP_03	HINFP
Transfac.V$HINFP_01	HINFP
Transfac.V$E4F1_Q6_01	E4F1
Transfac.V$FLI1_04	FLI1
Transfac.V$MTF1_06	MTF1
Transfac.V$MTF1_07	MTF1
Transfac.V$MTF1_01	MTF1
Transfac.V$MTF1_02	MTF1
Transfac.V$UNCX_02	UNCX
Transfac.V$E2F1_Q6	E2F1
Transfac.V$ZFP161_04	ZBTB14
Transfac.V$ZBTB7A_01	ZBTB7A
Transfac.V$SPDEF_05	SPDEF
Transfac.V$SPDEF_04	SPDEF
Transfac.V$SPDEF_07	SPDEF
Transfac.V$SPDEF_06	SPDEF
Transfac.V$SPDEF_03	SPDEF
Transfac.V$SOX21_05	SOX21
Transfac.V$PKNOX1_02	PKNOX1
Transfac.V$MAFK_03	MAFK
Transfac.V$MAFK_05	MAFK
Transfac.V$MAFK_04	MAFK
Transfac.V$MAFK_06	MAFK
Transfac.V$GBX2_03	GBX2
Transfac.V$CART1_02	RAB11FIP3
Transfac.V$CART1_03	RAB11FIP3
Transfac.V$RSRFC4_Q2	MEF2A
Transfac.V$DUXA_01	DUXA
Transfac.V$TAL1_01	TAL1
Transfac.V$GBX2_04	GBX2
Transfac.V$GLI3_02	GLI3
Transfac.V$GLI3_01	GLI3
Transfac.V$FIGLA_01	FIGLA
Transfac.V$FOXC2_03	FOXC2
Transfac.V$FOXC2_02	FOXC2
Transfac.V$FOXC2_01	FOXC2
Transfac.V$CAP_01	BRD4
Transfac.V$ELF1_Q6	EFNA2
Transfac.V$ELF1_Q5	ELF1
Transfac.V$FOXO3_01	FOXO3
Transfac.V$FOXO3_02	FOXO3
Transfac.V$FOXO3_03	FOXO3
Transfac.V$FOXO3_04	FOXO3
Transfac.V$FOXO3_05	FOXO3
Transfac.V$GLI2_01	GLI2
Transfac.V$GLI2_03	GLI2
Transfac.V$GLI2_04	GLI2
Transfac.V$USF2_Q6_01	USF2
Transfac.V$ARID3A_02	ARID3A
Transfac.V$ARNT_Q6	ARNT
Transfac.V$NGFIC_01	EGR4
Transfac.V$BHLHE40_01	BHLHE40
Transfac.V$BHLHE40_02	BHLHE40
Transfac.V$TP63_01	TP63
Transfac.V$SOX8_07	SOX8
Transfac.V$HOX13_02	HOXA5
Transfac.V$ZNF713_01	ZNF713
Transfac.V$ESE1_Q3	ELF3
Transfac.V$HOXD10_01	HOXD10
Transfac.V$LHX61_02	LHX6
Transfac.V$LHX61_01	LHX6
Transfac.V$TCF3_Q6	TCF7L1
Transfac.V$NR4A2_02	NR4A2
Transfac.V$RXRG_02	RXRG
Transfac.V$FKHL5_Q3	FOXF1
Transfac.V$GLI1_01	GLI1
Transfac.V$FOXO6_03	FOXO6
Transfac.V$PMX1_Q6	PRRX1
Transfac.V$FOXO6_01	FOXO6
Transfac.V$AP1_01	JUND
Transfac.V$AP1_02	JUN
Transfac.V$HOXD12_01	HOXD12
Transfac.V$HOXD12_03	HOXD12
Transfac.V$GBX1_03	GBX1
Transfac.V$GBX1_01	GBX1
Transfac.V$TAL1_Q6_01	TAL1
Transfac.V$DELTAEF1_01	ZEB1
Transfac.V$CREL_Q6	REL
Transfac.V$FOXO4_05	FOXO4
Transfac.V$HMX1_01	HMX3
Transfac.V$HMX1_02	HMX1
Transfac.V$FOXO4_01	FOXO4
Transfac.V$HMX1_05	HMX1
Transfac.V$FOXO4_03	FOXO4
Transfac.V$FOXO4_02	FOXO4
Transfac.V$HOXC12_01	HOXC12
Transfac.V$HOXC12_03	HOXC12
Transfac.V$HOXC12_04	HOXC12
Transfac.V$ELF2_02	ELF2
Transfac.V$PRX2_Q2	PRRX2
Transfac.V$STAT4_01	STAT4
Transfac.V$GMEB2_01	GMEB2
Transfac.V$E2F2_07	E2F2
Transfac.V$E2F2_06	E2F2
Transfac.V$BACH2_01	BACH2
Transfac.V$E2F2_04	E2F2
Transfac.V$E2F2_03	E2F2
Transfac.V$CJUN_Q6	JUN
Transfac.V$ZSCAN4_03	ZSCAN4
Transfac.V$HMX3_02	HMX3
Transfac.V$HMX3_03	HMX3
Transfac.V$ZSCAN4_05	ZSCAN4
Transfac.V$ZSCAN4_04	ZSCAN4
Transfac.V$NFAT1_Q6	NFATC2
Transfac.V$STAT3_01	STAT3
Transfac.V$STAT3_02	STAT3
Transfac.V$STAT3_03	STAT3
Transfac.V$TWIST_Q6	TWIST1
Transfac.V$CUX2_03	CUX2
Transfac.V$STAT1_05	STAT1
Transfac.V$STAT1_02	STAT1
Transfac.V$STAT1_03	STAT1
Transfac.V$STAT1_01	STAT1
Transfac.V$FOXL1_02	FOXL1
Transfac.V$FOXL1_05	FOXL1
Transfac.V$FOXL1_04	FOXL1
Transfac.V$FOXL1_06	FOXL1
Transfac.V$NFKAPPAB65_01	NFKB1
Transfac.V$HOXC13_04	HOXC13
Transfac.V$HOXC13_03	HOXC13
Transfac.V$HOXC13_01	HOXC13
Transfac.V$MSC_01	MSC
Transfac.V$ERBETA_Q5	ESR2
Transfac.V$SFPI1_04	SPI1
Transfac.V$HOXC11_01	HOXC11
Transfac.V$HOXC11_03	HOXC11
Transfac.V$HOXC11_04	HOXC11
Transfac.V$STAT5A_Q6	STAT5A
Transfac.V$ATF4_03	ATF4
Transfac.V$ATF4_02	ATF4
Transfac.V$FOXI1_02	FOXI1
Transfac.V$MEF2A_Q6	MEF2A
Transfac.V$FOXO1_Q5	FOXO1
Transfac.V$BHLHE41_02	BHLHE41
Transfac.V$EVI1_05	RUNX1
Transfac.V$EVI1_04	RUNX1
Transfac.V$HSF4_01	HSF4
Transfac.V$EVI1_06	RUNX1
Transfac.V$EVI1_01	RUNX1
Transfac.V$EVI1_03	RUNX1
Transfac.V$EVI1_02	RUNX1
Transfac.V$MRF4_Q3	MYF6
Transfac.V$P53DECAMER_Q2	TP53
Transfac.V$AP4_Q5	TFAP4
Transfac.V$KLF16_01	KLF16
Transfac.V$AP4_Q6	TFAP4
Transfac.V$FOXC1_06	FOXC1
Transfac.V$FOXC1_04	FOXC1
Transfac.V$FOXC1_05	FOXC1
Transfac.V$SPIB_Q3	SPIB
Transfac.V$FOXC1_03	FOXC1
Transfac.V$LBX2_01	LBX2
Transfac.V$LBX2_03	LBX2
Transfac.V$LBX2_04	LBX2
Transfac.V$ZKSCAN3_01	ZKSCAN3
Transfac.V$LEF1_Q2_01	LEF1
Transfac.V$GKLF_02	KLF4
Transfac.V$TGIF2LX_01	TGIF2LX
Transfac.V$AP1FJ_Q2	JUND
Transfac.V$MAF_Q6	MAF
Transfac.V$ETV1_01	ETV1
Transfac.V$CBF_01	CEBPZ
Transfac.V$CBF_02	CEBPZ
Transfac.V$IPF1_Q5_01	PDX1
Transfac.V$SP100_04	SP100
Transfac.V$SP100_03	SP100
Transfac.V$ISL2_02	ISL2
Transfac.V$ISL2_03	ISL2
Transfac.V$ISL2_01	ISL2
Transfac.V$ISL2_07	ISL2
Transfac.V$ISL2_04	ISL2
Transfac.V$ISL2_05	ISL2
Transfac.V$OTX2_03	OTX2
Transfac.V$GMEB1_04	GMEB1
Transfac.V$KLF13_01	KLF13
Transfac.V$ELF4_05	ELF4
Transfac.V$ELF4_04	ELF3
Transfac.V$DBP_02	DBP
Transfac.V$ELF4_01	ELF4
Transfac.V$BCL6B_04	BCL6B
Transfac.V$BCL6B_05	BCL6B
Transfac.V$BCL6B_03	BCL6B
Transfac.V$E2_Q6_01	SNORD12C
Transfac.V$HFH3_01	FOXI1
Transfac.V$PREP1_01	PKNOX1
Transfac.V$ETV2_01	ETV2
Transfac.V$NURR1_Q3	NR4A2
Transfac.V$ZFX_01	ZFX
Transfac.V$NFATC2_01	NFATC2
Transfac.V$PAX2_05	PAX2
Transfac.V$TFAP4_02	TFAP4
Transfac.V$TFIII_Q6_01	GTF2I
Transfac.V$GFI1B_01	GFI1B
Transfac.V$POU3F3_02	POU3F3
Transfac.V$POU3F3_03	POU3F3
Transfac.V$POU3F3_04	POU3F3
Transfac.V$EMX2_01	EMX2
Transfac.V$EMX2_03	EMX2
Transfac.V$EMX2_04	EMX2
Transfac.V$E4BP4_01	NFIL3
Transfac.V$SREBP1_Q5	SREBF1
Transfac.V$POU1F1_03	POU1F1
Transfac.V$POU1F1_04	POU1F1
Transfac.V$EBF1_03	EBF1
Transfac.V$EBF1_01	EBF1
Transfac.V$PAX6_05	PAX6
Transfac.V$NR3C1_03	NR3C1
Transfac.V$NR3C1_01	NR3C1
Transfac.V$NR2C2_01	NR2C2
Transfac.V$FOXL2_Q2	FOXL2
Transfac.V$GLI3_Q5_01	GLI3
Transfac.V$GRE_C	NR3C1
Transfac.V$HFH1_01	FOXQ1
Transfac.V$EGR3_03	EGR3
Transfac.V$TFIII_Q6	GTF2I
Transfac.V$NR2E1_02	NR2E1
Transfac.V$NR2E1_01	NR2E1
Transfac.V$HMGIY_Q6	HMGA1
Transfac.V$OTX1_01	OTX1
Transfac.V$HMGIY_Q4	HMGA1
Transfac.V$OTX1_03	OTX1
Transfac.V$POU3F1_02	POU3F1
Transfac.V$HMGIY_Q3	HMGA1
Transfac.V$OTX1_06	OTX1
Transfac.V$MYB_Q3	MYB
Transfac.V$MYB_Q6	MYB
Transfac.V$CREB5_01	CREB5
Transfac.V$HEN1_02	HENMT1
Transfac.V$HEN1_01	HENMT1
Transfac.V$HESX1_01	HESX1
Transfac.V$HESX1_02	HESX1
Transfac.V$TBX4_02	TBX4
Transfac.V$TBX4_01	TBX4
Transfac.V$OTX3_01	DMBX1
Transfac.V$NR4A2_04	NR4A2
Transfac.V$HOXB13_04	HOXB13
Transfac.V$HIF1A_Q6	HIF1A
Transfac.V$HOXB13_01	HOXB13
Transfac.V$NR4A2_01	NR4A2
Transfac.V$HOXB13_03	HOXB13
Transfac.V$NR4A2_03	NR4A2
Transfac.V$MYC_01	MYC
Transfac.V$ING4_01	ING4
Transfac.V$CLOX_01	CUX1
Transfac.V$MEF2D_01	MEF2D
Transfac.V$OTX2_04	OTX2
Transfac.V$OTX2_01	OTX2
Transfac.V$PAX9_01	PAX9
Transfac.V$EAR2_Q2	NR2F6
Transfac.V$OTP_01	OTP
Transfac.V$AP1_Q4_01	JUND
Transfac.V$HNF1_Q6_01	HNF1A
Transfac.V$IRX4_01	IRX4
Transfac.V$USF1_02	USF1
Transfac.V$TAL1_Q6	TAL1
Transfac.V$FOXB1_03	FOXB1
Transfac.V$ATF3_Q6	ATF3
Transfac.V$LIM1_01	LHX1
Transfac.V$JUNDM2_03	JDP2
Transfac.V$RREB1_01	RREB1
Transfac.V$JUNDM2_04	JDP2
Transfac.V$E4F1_Q6	E4F1
Transfac.V$RORA_06	RORA
Transfac.V$RORA_05	RORA
Transfac.V$MLXIPL_01	MLXIPL
Transfac.V$ETV4_01	ETV4
Transfac.V$PLAG1_01	PLAG1
Transfac.V$IRF2_Q6	IRF2
Transfac.V$MRG2_01	MEIS3
Transfac.V$E2F6_01	E2F6
Transfac.V$TGIF1_03	TGIF1
Transfac.V$TGIF1_01	TGIF1
Transfac.V$EGR2_02	EGR2
Transfac.V$FOXH1_Q6	FOXH1
Transfac.V$TCF4_Q5_02	TCF7L2
Transfac.V$TCF4_Q5_01	TCF7L2
Transfac.V$PLAG1_02	PLAG1
Transfac.V$IRF8_01	IRF8
Transfac.V$GAF_Q6	FGF9
Transfac.V$SP3_01	SP3
Transfac.V$KLF14_01	KLF14
Transfac.V$EMX1_01	EMX1
Transfac.V$SOX9_B1	SOX9
Transfac.V$TEF_Q6	TEF
Transfac.V$NKX52_01	HMX2
Transfac.V$MGA_03	MGA
Transfac.V$MGA_01	MGA
Transfac.V$HOXA10_04	HOXA10
Transfac.V$ETV6_01	ETV6
Transfac.V$HOXA10_03	HOXA10
Transfac.V$ETV6_02	ETV6
Transfac.V$NR2F6_01	NR2F6
Transfac.V$NKX3A_02	NKX3-1
Transfac.V$NKX3A_01	NKX3-1
Transfac.V$BCL6_Q3	BCL6
Transfac.V$HOXB2_01	HOXB2
Transfac.V$HOMEZ_01	HOMEZ
Transfac.V$HOMEZ_03	HOMEZ
Transfac.V$CREB3_01	CREB3
Transfac.V$CREB3_02	CREB3
Transfac.V$AP2ALPHA_01	TFAP2A
Transfac.V$VDR_01	VDR
Transfac.V$HOXC5_01	HOXC5
Transfac.V$CREB1_01	CREB1
Transfac.V$CDX1_03	CDX1
Transfac.V$CREBP1_01	ATF2
Transfac.V$HOXC4_01	HOXC4
Transfac.V$AP4_Q6_01	TFAP4
Transfac.V$AP4_Q6_02	TFAP4
Transfac.V$HINFP_02	HINFP
Transfac.V$SP1_05	SP1
Transfac.V$SP1_03	SP1
Transfac.V$SP1_02	SP1
Transfac.V$SP1_01	SP1
Transfac.V$BARX1_04	BARX1
Transfac.V$BARX1_01	BARX1
Transfac.V$BARX1_03	BARX1
Transfac.V$SATB1_Q5_01	SATB1
Transfac.V$TRP53_01	TP53
Transfac.V$TRP53_03	TP53
Transfac.V$TRP53_02	TP53
Transfac.V$EKLF_Q5	KLF1
Transfac.V$WT1_Q6	WT1
Transfac.V$HOXC6_01	HOXC6
Transfac.V$TBR1_01	TBR1
Transfac.V$ESR2_01	ESR2
Transfac.V$RARA_05	RARA
Transfac.V$PEA3_Q6	ETV4
Transfac.V$IPF1_04	PDX1
Transfac.V$IPF1_05	PDX1
Transfac.V$IPF1_06	PDX1
Transfac.V$MEF2_Q6_01	MYEF2
Transfac.V$IPF1_01	PDX1
Transfac.V$IPF1_02	PDX1
Transfac.V$IPF1_03	PDX1
Transfac.V$TBX19_01	TBX19
Transfac.V$HELIOSA_01	IKZF2
Transfac.V$HELIOSA_02	IKZF2
Transfac.V$HIF1_Q5	HIF1A
Transfac.V$HIF1_Q3	HIF1A
Transfac.V$MTF1_05	MTF1
Transfac.V$NR2F2_04	NR2F2
Transfac.V$ARNT_01	ARNT
Transfac.V$DEAF1_02	DEAF1
Transfac.V$NR2F2_03	NR2F2
Transfac.V$NKX62_Q2	NKX6-2
Transfac.V$P50_Q6	ASCC1
Transfac.V$TBX2_01	TBX2
Transfac.V$TBX2_02	TBX2
Transfac.V$BHLHA15_01	BHLHA15
Transfac.V$TBX1_05	TBX1
Transfac.V$TBX1_04	TBX1
Transfac.V$TBX1_01	TBX1
Transfac.V$TBX18_01	TBX18
Transfac.V$TBX1_03	TBX1
Transfac.V$TBX1_02	TBX1
Transfac.V$ZBTB7B_05	ZBTB7B
Transfac.V$ZBTB7B_04	ZBTB7B
Transfac.V$ZBTB7B_03	ZBTB7B
Transfac.V$ERR2_01	ESRRB
Transfac.V$SOX14_03	SOX14
Transfac.V$E2_01	SNORD12C
Transfac.V$ZNF75A_01	ZNF75A
Transfac.V$MAZR_01	PATZ1
Transfac.V$MEF2A_05	MEF2A
Transfac.V$MEF2A_03	MEF2A
Transfac.V$LRH1_Q5_01	P2RX5
Transfac.V$TFAP2A_05	TFAP2A
Transfac.V$NKX23_01	NKX2-3
Transfac.V$NKX23_03	NKX2-3
Transfac.V$HOXC9_01	HOXC9
Transfac.V$MRF2_01	ARID5B
Transfac.V$TEF1_Q6	TEAD1
Transfac.V$AP2GAMMA_Q5	TFAP2A
Transfac.V$ZBTB3_03	ZBTB3
Transfac.V$ZNF740_01	ZNF740
Transfac.V$TITF1_Q3	TTF1
Transfac.V$RXRA_06	RXRA
Transfac.V$SREBP2_Q6	SREBF2
Transfac.V$SOX9_Q4	SOX9
Transfac.V$YY2	YY2
Transfac.V$ELK3_02	ELK3
Transfac.V$ELK3_01	ELK3
Transfac.V$SOX10_Q6_01	SOX10
Transfac.V$FOXP3_Q4	FOXP3
Transfac.V$NKX25_02	NKX2-5
Transfac.V$NKX25_01	NKX2-5
Transfac.V$STAT5B_01	STAT5B
Transfac.V$MEIS3_04	MEIS3
Transfac.V$MEIS3_05	MEIS3
Transfac.V$MEIS3_02	MEIS3
Transfac.V$MEIS3_03	MEIS3
Transfac.V$YY2_01	YY2
Transfac.V$CDC5_01	CDC5L
Transfac.V$AP2_Q6_01	TFAP2A
Transfac.V$MEIS2_08	MEIS2
Transfac.V$MEIS2_01	MEIS2
Transfac.V$MEIS2_07	MEIS2
Transfac.V$MEIS2_06	MEIS2
Transfac.V$MEIS2_05	MEIS2
Transfac.V$ATOH1_01	ATOH1
Transfac.V$VENTX_02	VENTX
Transfac.V$SREBP2_Q6_01	SREBF2
Transfac.V$HES5_01	HES5
Transfac.V$GRHL1_02	GRHL1
Transfac.V$GRHL1_01	GRHL1
Transfac.V$ELK1_09	ELK1
Transfac.V$ELK1_08	ELK1
Transfac.V$VENTX_01	VENTX
Transfac.V$HES7_01	HES7
Transfac.V$MYBL2_05	MYBL2
Transfac.V$MYBL2_04	MYBL2
Transfac.V$MYBL2_03	MYBL2
Transfac.V$MYBL2_02	MYBL2
Transfac.V$TTF1_Q5_01	TTF1
Transfac.V$FKLF_Q5	KLF11
Transfac.V$SLUG_Q6	SNAI2
Transfac.V$EMX1_02	EMX1
Transfac.V$PPARG_03	PPARA
Transfac.V$ARNTL_01	ARNTL
Transfac.V$MEIS1_04	MEIS1
Transfac.V$MEIS1_02	MEIS1
Transfac.V$MEIS1_01	MEIS1
Transfac.V$HMGA2_01	HMGA2
Transfac.V$AP4_01	TFAP4
Transfac.V$SMAD3_03	SMAD3
Transfac.V$SMAD3_02	SMAD3
Transfac.V$NKX29_01	NKX2-8
Transfac.V$EFC_Q6	RFX1
Transfac.V$EOMES_03	EOMES
Transfac.V$EOMES_04	EOMES
Transfac.V$EOMES_05	EOMES
Transfac.V$EOMES_06	EOMES
Transfac.V$ISGF3G_03	IRF9
Transfac.V$FOXK1_06	FOXK1
Transfac.V$FOXK1_07	FOXK1
Transfac.V$FOXK1_04	FOXK1
Transfac.V$FOXK1_05	FOXK1
Transfac.V$FOXK1_03	FOXK1
Transfac.V$SP2_Q3_01	SP2
Transfac.V$HOXA10_01	HOXA10
Transfac.V$GKLF_Q4	KLF4
Transfac.V$CIZ_01	ZNF384
Transfac.V$SP8_01	SP8
Transfac.V$MMEF2_Q6	MYEF2
Transfac.V$BHLHE22_01	BHLHE22
Transfac.V$AHR_Q6	AHR
Transfac.V$AHR_Q5	AHR
Transfac.V$NERF_Q2	ELF2
Transfac.V$ZFP691_03	ZNF691
Transfac.V$ZFP691_04	ZNF691
Transfac.V$BHLHB2_04	BHLHE40
Transfac.V$ELF_02	ELF1
Transfac.V$STAT_Q6	SOAT1
Transfac.V$NUR77_Q5_01	NR4A1
Transfac.V$STAT6_02	STAT6
Transfac.V$STAT6_01	STAT6
Transfac.V$E47_02	TCF3
Transfac.V$SREBF1_01	SREBF1
Transfac.V$E47_01	TCF3
Transfac.V$HOXD11_04	HOXD11
Transfac.V$HOXD11_01	HOXD11
Transfac.V$HOXD11_03	HOXD11
Transfac.V$ZFP128_03	ZNF8
Transfac.V$GBX2_01	GBX2
Transfac.V$ZFP128_04	ZNF8
Transfac.V$CTCF_02	CTCF
Transfac.V$MAFK_Q3	MAFK
Transfac.V$CTCF_01	CTCF
Transfac.V$CTCF_04	CTCF
Transfac.V$E2A_Q6_01	TCF3
Transfac.V$PHOX2A_02	PHOX2A
Transfac.V$DEC_Q1	PTEN
Transfac.V$AIRE_02	AIRE
Transfac.V$AIRE_01	AIRE
Transfac.V$BHLHE23_01	BHLHE23
Transfac.V$GCM1_03	GCM1
Transfac.V$GCM1_04	GCM1
Transfac.V$GCM1_05	GCM1
Transfac.V$GCM1_06	GCM1
Transfac.V$CUX2_02	CUX2
Transfac.V$SOX10_01	SOX10
Transfac.V$SOX10_02	SOX10
Transfac.V$SOX10_03	SOX10
Transfac.V$SOX10_04	SOX10
Transfac.V$SREBF2_01	SREBF2
Transfac.V$SOX10_06	SOX10
Transfac.V$SF1_Q6	NR5A1
Transfac.V$SF1_Q5	NR5A1
Transfac.V$NEUROD_02	NEUROD1
Transfac.V$SP1_Q6_02	SP1
Transfac.V$SP1_Q6_01	SP1
Transfac.V$CHX10_01	VSX2
Transfac.V$GCM2_01	GCM2
Transfac.V$ELF1_01	ELF1
Transfac.V$ELF1_02	ELF1
Transfac.V$SOX12_03	SOX12
Transfac.V$SOX12_04	SOX12
Transfac.V$LRH1_Q5	NR5A2
Transfac.V$MESP1_01	MESP1
Transfac.V$OSF2_Q6	POSTN
Transfac.V$ELF3_02	ELF3
Transfac.V$RFXDC2_03	RFX7
Transfac.V$HIC1_08	HIC1
Transfac.V$HIC1_07	HIC1
Transfac.V$HIC1_06	HIC1
Transfac.V$HIC1_05	HIC1
Transfac.V$HOXD13_04	HOXD13
Transfac.V$HIC1_03	HIC1
Transfac.V$HIC1_02	HIC1
Transfac.V$HOXD13_01	HOXD13
Transfac.V$IRF_Q6	TRIM63
Transfac.V$TCF21_01	TCF21
Transfac.V$DLX4_02	DLX4
Transfac.V$P73_Q6	ARHGAP24
Transfac.V$ZABC1_01	ZNF217
Transfac.V$NCX_01	TLX2
Transfac.V$NCX_02	TLX2
Transfac.V$ROAZ_01	ZNF423
Transfac.V$HLTF_Q4	HLTF
Transfac.V$SPI1_Q5	SPI1
Transfac.V$PITX2_Q2	PITX2
Transfac.V$PITX2_Q6	PITX2
Transfac.V$SOX13_03	SOX13
Transfac.V$SOX13_04	SOX13
Transfac.V$BSX_01	BSX
Transfac.V$BSX_03	BSX
Transfac.V$RFX_Q6	RFX1
Transfac.V$BCL6_01	BCL6
Transfac.V$BCL6_02	BCL6
Transfac.V$SOX14_05	SOX14
Transfac.V$SOX14_06	SOX14
Transfac.V$SOX14_07	SOX14
Transfac.V$ALX3_02	ALX3
Transfac.V$FPM315_01	ZNF263
Transfac.V$SOX14_08	SOX14
Transfac.V$BACH1_01	BACH1
Transfac.V$FEV_01	FEV
Transfac.V$FEV_02	FEV
Transfac.V$TFAP2C_02	TFAP2C
Transfac.V$TFAP2C_03	TFAP2C
Transfac.V$CUX1_05	CUX1
Transfac.V$FLI1_Q6	FLI1
Transfac.V$GR_Q6	NR3C1
Transfac.V$TFAP2C_01	TFAP2C
Transfac.V$PEA3_02	ETV4
Transfac.V$PEA3_01	ETV4
Transfac.V$CEBPE_02	CEBPE
Transfac.V$CEBPE_01	CEBPE
Transfac.V$HNF4A_08	HNF4A
Transfac.V$HNF4A_05	HNF4A
Transfac.V$HNF4A_06	HNF4A
Transfac.V$HNF4A_07	HNF4A
Transfac.V$HNF4A_02	HNF4A
Transfac.V$HNF4A_03	HNF4A
Transfac.V$PEBP_Q6	PEBP1
Transfac.V$GSC_03	GSC
Transfac.V$GSC_01	GSC
Transfac.V$POU4F1_Q6	POU4F1
Transfac.V$TEL1_01	ATM
Transfac.V$TEL1_02	ATM
Transfac.V$SOX15_03	SOX15
Transfac.V$SOX15_07	SOX15
Transfac.V$SOX15_06	SOX15
Transfac.V$SOX15_05	SOX15
Transfac.V$SOX15_04	SOX15
Transfac.V$HOXD3_01	HOXD3
Transfac.V$HOXD3_03	HOXD3
Transfac.V$SOX7_06	SOX7
Transfac.V$ARX_04	ARX
Transfac.V$IRF2_01	IRF2
Transfac.V$RPC155_01	POLR3A
Transfac.V$ARX_01	ARX
Transfac.V$ARX_02	ARX
Transfac.V$ARX_03	ARX
Transfac.V$TEF_04	TEF
Transfac.V$SMAD4_Q6	SMAD4
Transfac.V$TEF_01	TEF
Transfac.V$IPF1_Q4_01	PDX1
Transfac.V$BBX_04	BBX
Transfac.V$TCF7_04	TCF7
Transfac.V$SP4_03	SP4
Transfac.V$SP4_04	SP4
Transfac.V$TCF7_03	TCF7
Transfac.V$BBX_03	BBX
Transfac.V$VAX1_03	VAX1
Transfac.V$SP1_Q4_01	SP1
Transfac.V$EVI1_Q3	RUNX1
Transfac.V$SMAD4_Q6_01	SMAD4
Transfac.V$RFX1_Q6	RFX1
Transfac.V$GR_Q6_02	NR3C1
Transfac.V$GZF1_01	GZF1
Transfac.V$RP58_01	ZNF513
Transfac.V$GR_Q6_01	NR3C1
Transfac.V$SP2_01	SP2
Transfac.V$CDP_01	CUX1
Transfac.V$ELF5_02	ELF5
Transfac.V$CDP_03	CUX1
Transfac.V$ELF5_04	ELF5
Transfac.V$ELF5_05	ELF5
Transfac.V$SATB1_Q3	SATB1
Transfac.V$EHF_07	EHF
Transfac.V$SRY_10	SRY
Transfac.V$EHF_02	EHF
Transfac.V$EHF_03	EHF
Transfac.V$SRY_11	SRY
Transfac.V$EHF_08	EHF
Transfac.V$HOXA6_01	HOXA6
Transfac.V$ESE1_02	ELF3
Transfac.V$ESE1_01	ELF3
Transfac.V$TCF3_01	TCF7L1
Transfac.V$TCF3_06	TCF3
Transfac.V$TCF3_04	TCF3
Transfac.V$ZBED6_01	ZBED6
Transfac.V$HOXA4_01	HOXA4
Transfac.V$HOXD13_06	HOXD13
Transfac.V$AML2_Q3_01	RUNX3
Transfac.V$HB24_01	HLX
Transfac.V$TEF_03	TEF
Transfac.V$PAX3_02	PAX3
Transfac.V$HOXD13_05	HOXD13
Transfac.V$SOX21_08	SOX21
Transfac.V$SOX21_04	SOX21
Transfac.V$MEOX2_03	MEOX2
Transfac.V$SOX21_06	SOX21
Transfac.V$MEOX2_01	MEOX2
Transfac.V$MEOX2_04	MEOX2
Transfac.V$SOX21_03	SOX21
Transfac.V$TCF7_05	TCF7
Transfac.V$SOX10_05	SOX10
Transfac.V$SP4_05	SP4
Transfac.V$MYOD_01	MYOD1
Transfac.V$ZNF524_01	ZNF524
Transfac.V$HOXA5_03	HOXA5
Transfac.V$ZNF524_02	ZNF524
Transfac.V$HOXD13_03	HOXD13
Transfac.V$ERR3_Q2	ESRRG
Transfac.V$MEOX1_02	MEOX1
Transfac.V$TBX15_04	TBX15
Transfac.V$TBX15_03	TBX15
Transfac.V$TBX15_02	TBX15
Transfac.V$TBX15_01	TBX15
Transfac.V$OLIG2_01	OLIG2
Transfac.V$PHOX2B_02	PHOX2B
Transfac.V$SOX18_03	SOX18
Transfac.V$SOX18_04	SOX18
Transfac.V$SOX18_05	SOX18
Transfac.V$SOX18_06	SOX18
Transfac.V$SOX18_07	SOX18
Transfac.V$HOXA3_07	HOXA3
Transfac.V$HOXA3_01	HOXA3
Transfac.V$HOXA3_02	HOXA3
Transfac.V$SOX5_Q5	SOX5
Transfac.V$FXR_Q2	NR1H4
Transfac.V$FXR_Q5	NR1H4
Transfac.V$HOXA2_03	HOXA2
Transfac.V$NMYC_Q3	MYCN
Transfac.V$HOXA2_01	HOXA2
Transfac.V$PAX1_01	PAX1
Transfac.V$HOXA2_04	HOXA2
Transfac.V$MIZF_01	HINFP
Transfac.V$NR3C2_01	NR3C2
Transfac.V$PAX5_05	PAX5
Transfac.V$SHOX2_03	SHOX2
Transfac.V$CPEB1_01	CPEB1
Transfac.V$TBX5_01	TBX5
Transfac.V$TBX5_03	TBX5
Transfac.V$TBX5_02	TBX5
Transfac.V$TBX5_04	TBX5
Transfac.V$CDP_Q6_01	CUX1
Transfac.V$OCT3_Q6	SLC22A3
Transfac.V$SOX17_04	SOX17
Transfac.V$SOX17_07	SOX17
Transfac.V$SOX17_01	SOX17
Transfac.V$IPF1_Q6	PDX1
Transfac.V$IPF1_Q5	PDX1
Transfac.V$IPF1_Q4	PDX1
Transfac.V$PAX7_03	PAX7
Transfac.V$MNX1_02	MNX1
Transfac.V$POU5F1_01	POU5F1
Transfac.V$SPZ1_01	SPZ1
Transfac.V$PLZFB_Q3	ZBTB16
Transfac.V$MYB_05	MYB
Transfac.V$MYB_03	MYB
Transfac.V$VDR_Q6_01	VDR
Transfac.V$ATF4_Q2	ATF4
Transfac.V$HOXA1_03	HOXA1
Transfac.V$HOXA1_01	HOXA1
Transfac.V$SALL2_01	SALL2
Transfac.V$VSX1_01	VSX1
Transfac.V$VSX1_03	VSX1
Transfac.V$IRF6_04	IRF6
Transfac.V$RUNX2_01	RUNX2
Transfac.V$RUNX2_02	RUNX2
Transfac.V$RUNX2_03	RUNX2
Transfac.V$HP1SITEFACTOR_Q6	DEFA1B
Transfac.V$MSX2_04	MSX2
Transfac.V$ELF5_01	ELF5
Transfac.V$TFIIB_Q6	GTF2B
Transfac.V$RUNX3_02	RUNX3
Transfac.V$LEF1_04	LEF1
Transfac.V$LEF1_05	LEF1
Transfac.V$CDP_02	CUX1
Transfac.V$ELF5_03	ELF5
Transfac.V$CDP_04	CUX1
Transfac.V$PU1_Q4	SPI1
Transfac.V$ZEC_01	ZNF628
Transfac.V$NFE4_Q5	NFE4
Transfac.V$MAFA_Q4	MAFA
Transfac.V$MAFA_Q5	MAFA
Transfac.V$TGIF2_03	TGIF2
Transfac.V$MITF_Q6	MITF
Transfac.V$TGIF2_01	TGIF2
Transfac.V$IRF1_01	IRF1
Transfac.V$EHF_06	EHF
Transfac.V$REX1_02	ZFP42
Transfac.V$DBX2_01	DBX2
Transfac.V$REX1_01	ZFP42
Transfac.V$NKX12_01	NKX1-2
Transfac.V$VSX2_01	VSX2
Transfac.V$P300_01	EP300
Transfac.V$CENPB_01	CENPB
Transfac.V$HOXA9_Q5	HOXA9
Transfac.V$TFEB_01	TFEB
Transfac.V$TFEB_02	TFEB
Transfac.V$IRF7_03	IRF7
Transfac.V$IRF7_04	IRF7
Transfac.V$ZNF282_01	ZNF282
Transfac.V$RXRB_02	RXRB
Transfac.V$IRF4_05	IRF4
Transfac.V$IRF4_04	IRF4
Transfac.V$PET1_01	FEV
Transfac.V$PET1_02	FEV
Transfac.V$MAF_Q6_01	MAF
Transfac.V$IRF5_06	IRF5
Transfac.V$ICSBP_Q6	IRF8
Transfac.V$IRF5_05	IRF5
Transfac.V$HOXD8_01	HOXD8
Transfac.V$IRF9_01	IRF9
Transfac.V$FOXO6_02	FOXO6
Transfac.V$NFE2_Q6	NFE2
Transfac.V$HOXD12_04	HOXD12
Transfac.V$E2A_Q2	TCF3
Transfac.V$ZID_01	ZBTB6
Transfac.V$HNF6_Q4	ONECUT1
Transfac.V$E2A_Q6	TCF3
Transfac.V$HNF6_Q6	ONECUT1
Transfac.V$PRDM4_01	PRDM4
Transfac.V$GCNF_01	NR6A1
Transfac.V$SOX17_Q2	SOX17
Transfac.V$HOXA11_01	HOXA11
Transfac.V$HOXA11_04	HOXA11
Transfac.V$MTF1_Q5	MTF1
Transfac.V$ARNT_02	ARNT
Transfac.V$JUNB_Q6	JUNB
Transfac.V$CREB_02	CREB1
Transfac.V$TGIF_01	TGIF1
Transfac.V$GBX1_04	GBX1
Transfac.V$CREB_01	CREB1
Transfac.V$PITX3_03	PITX3
Transfac.V$PITX3_01	PITX3
Transfac.V$SRF_C	SRF
Transfac.V$OLIG1_01	OLIG1
Transfac.V$NET_02	SLC6A2
Transfac.V$NET_01	SLC6A2
Transfac.V$TCF3_05	TCF3
Transfac.V$TCF4_Q5	TCF7L2
Transfac.V$GCMA_Q4	GCM1
Transfac.V$PITX1_04	PITX1
Transfac.V$OSR2_04	OSR2
Transfac.V$PITX1_01	PITX1
Transfac.V$OSR2_03	OSR2
Transfac.V$PITX1_03	PITX1
Transfac.V$NOTO_01	NOTO
Transfac.V$E2F1_Q4	E2F1
Transfac.V$FOXO3A_Q1	FOXO3
Transfac.V$OSR1_04	OSR1
Transfac.V$OSR1_03	OSR1
Transfac.V$PITX2_01	PITX2
Transfac.V$E2F1_Q3	E2F1
Transfac.V$SPIC_03	SPIC
Transfac.V$NFE2L2_01	NFE2L2
Transfac.V$NRF2_Q6	NFE2L2
Transfac.V$HOXB8_01	HOXB8
Transfac.V$SIRT6_01	SIRT6
Transfac.V$AP1_Q2_01	JUND
Transfac.V$CREBP1_Q2	ATF2
Transfac.V$DMBX1_02	DMBX1
Transfac.V$CREB_Q2_01	CREB1
Transfac.V$IRF_Q6_01	TRIM63
Transfac.V$FOXO4_04	FOXO4
Transfac.V$NKX3A_Q3	NKX3-1
Transfac.V$MEF2_04	MYEF2
Transfac.V$MEF2_02	MYEF2
Transfac.V$MEF2_03	MYEF2
Transfac.V$MEF2_01	MYEF2
Transfac.V$ALX4_05	ALX4
Transfac.V$ALX4_06	ALX4
Transfac.V$ALX4_03	ALX4
Transfac.V$WT1_Q6_02	WT1
Transfac.V$WT1_Q6_01	WT1
Transfac.V$OTX1_05	OTX1
Transfac.V$TRF1_01	TERF1
Transfac.V$BARHL2_03	BARHL2
Transfac.V$REST_Q5	REST
Transfac.V$CMYB_Q5	MYB
Transfac.V$NFIL3_03	NFIL3
Transfac.V$FOXJ3_12	FOXJ3
Transfac.V$FOXJ3_13	FOXJ3
Transfac.V$FOXJ3_10	FOXJ3
Transfac.V$FOXJ3_11	FOXJ3
Transfac.V$HTF4_Q2	TCF12
Transfac.V$CREB3L2_01	CREB3L2
Transfac.V$CREB3L2_02	CREB3L2
Transfac.V$ZIC3_07	ZIC3
Transfac.V$ZIC3_06	ZIC3
Transfac.V$ZIC3_05	ZIC3
Transfac.V$ZIC3_04	ZIC3
Transfac.V$ZIC3_01	ZIC3
Transfac.V$MEOX2_02	MEOX2
Transfac.V$AHR_01	AHR
Transfac.V$NFYC_Q5	NFYC
Transfac.V$DMRT4_01	DMRTA1
Transfac.V$NERF_01	ELF2
Transfac.V$GR_01	NR3C1
Transfac.V$SOX21_07	SOX21
Transfac.V$ISGF4G_04	IRF9
Transfac.V$IRF8_Q6	IRF8
Transfac.V$ZIC1_05	ZIC1
Transfac.V$ZIC1_04	ZIC1
Transfac.V$ZIC1_06	ZIC1
Transfac.V$ZIC1_01	ZIC1
Transfac.V$AP1_Q6_01	JUND
Transfac.V$AP1_Q6_02	JUND
Transfac.V$PPARDR1_Q2	PPARA
Transfac.V$DEC2_Q2	BHLHE41
Transfac.V$POU4F1_01	POU4F1
Transfac.V$NFAT5_Q5_02	NFAT5
Transfac.V$NFAT5_Q5_01	NFAT5
Transfac.V$PROP1_02	PROP1
Transfac.V$HOXA13_05	HOXA13
Transfac.V$HOXA13_06	HOXA13
Transfac.V$HOXA13_01	HOXA13
Transfac.V$HOXA13_02	HOXA13
Transfac.V$HOXA13_03	HOXA13
Transfac.V$TFAP2A_02	TFAP2A
Transfac.V$TFAP2A_03	TFAP2A
Transfac.V$TFAP2A_04	TFAP2A
Transfac.V$NR1B2_Q6	RARB
Transfac.V$TFAP2A_06	TFAP2A
Transfac.V$TFAP2A_07	TFAP2A
Transfac.V$CREB_Q4_01	CREB1
Transfac.V$HOXD9_03	HOXD9
Transfac.V$HOXD9_02	HOXD9
Transfac.V$HOXD9_01	HOXD9
Transfac.V$TFAP2B_03	TFAP2B
Transfac.V$TFAP2B_02	TFAP2B
Transfac.V$TFAP2B_04	TFAP2B
Transfac.V$PROP1_04	PROP1
Transfac.V$E2F2_05	E2F2
Transfac.V$MNT_01	MNT
Transfac.V$MYB_Q5_01	MYB
Transfac.V$ELK4_02	ELK4
Transfac.V$GC_01	GC
Transfac.V$MIBP1_Q6	HIVEP2
Transfac.V$MZF1_Q5	MZF1
Transfac.V$E2_Q6	SNORD12C
Transfac.V$TEAD4_01	TEAD4
Transfac.V$PMX2A_01	PHOX2A
Transfac.V$WHN_B	FOXN1
Transfac.V$SOX1_08	SOX1
Transfac.V$SOX6_Q5	SOX6
Transfac.V$SOX1_03	SOX1
Transfac.V$SOX1_05	SOX1
Transfac.V$SOX1_04	SOX1
Transfac.V$SOX1_07	SOX1
Transfac.V$SOX1_06	SOX1
Transfac.V$HBP1_Q2	HBP1
Transfac.V$BTEB3_Q5	KLF13
Transfac.V$CUX1_03	CUX1
Transfac.V$CUX1_07	CUX1
Transfac.V$CUX1_06	CUX1
Transfac.V$HNF1_01	HNF1A
Transfac.V$CUX1_04	CUX1
Transfac.V$STAF_01	ZNF143
Transfac.V$STAF_02	ZNF143
Transfac.V$SMAD1_01	SMAD1
Transfac.V$SOX7_07	SOX7
Transfac.V$ARID5A_03	ARID5A
Transfac.V$SOX7_05	SOX7
Transfac.V$SOX7_04	SOX7
Transfac.V$SOX7_03	SOX7
Transfac.V$ARID5A_04	ARID5A
Transfac.V$POU2F1_03	POU2F1
Transfac.V$POU2F1_02	POU2F1
Transfac.V$LRF_Q6	CREBRF
Transfac.V$HOXA4_Q2	HOXA4
Transfac.V$AML3_Q6	RUNX2
Transfac.V$ZBTB4_04	ZBTB3
Transfac.V$CREB1_Q6	CREB1
Transfac.V$SHOX2_01	SHOX2
Transfac.V$CMAF_02	MAF
Transfac.V$CMAF_01	MAF
Transfac.V$SHOX2_04	SHOX2
Transfac.V$ZNF784_01	ZNF784
Transfac.V$CRX_Q4	CRX
Transfac.V$AML1_Q6	RUNX1
Transfac.V$AML1_Q4	RUNX1
Transfac.V$AML1_Q5	RUNX1
Transfac.V$RAX_03	RAX
Transfac.V$RAX_01	RAX
Transfac.V$OC2_Q3	ONECUT2
Transfac.V$HBP1_03	HBP1
Transfac.V$HBP1_04	HBP1
Transfac.V$ETV3_03	ETV3
Transfac.V$SOX4_Q5	SOX4
Transfac.V$SHOX_01	SHOX
Transfac.V$YY1_06	YY1
Transfac.V$YY1_01	YY1
Transfac.V$YY1_02	YY1
Transfac.V$YY1_03	YY1
Transfac.V$BATF3_01	BATF3
Transfac.V$BRF1_01	MST1L
Transfac.V$SP1_Q2_01	SP1
Transfac.V$FOXJ2_04	FOXJ2
Transfac.V$FOXJ2_05	FOXJ2
Transfac.V$FOXJ2_02	FOXJ2
Transfac.V$FOXJ2_03	FOXJ2
Transfac.V$FOXJ2_01	FOXJ2
Transfac.V$HSF1_Q6	HSF1
Transfac.V$ELF4_02	ELF4
Transfac.V$MYOD_Q6_01	MYOD1
Transfac.V$MYOD_Q6_02	MYOD1
Transfac.V$OCT2_Q6	POU2F2
Transfac.V$SOX5_04	SOX5
Transfac.V$SOX5_07	SOX4
Transfac.V$SOX5_01	SOX5
Transfac.V$DLX3_01	DLX3
Transfac.V$POU2F3_04	POU2F3
Transfac.V$POU2F3_03	POU2F3
Transfac.V$DLX3_04	DLX3
Transfac.V$POU2F3_01	POU2F3
Transfac.V$POU2F2_04	POU2F2
Transfac.V$POU2F2_05	POU2F2
Transfac.V$POU2F2_02	POU2F2
Transfac.V$POU2F2_03	POU2F2
Transfac.V$ASCL2_04	ASCL2
Transfac.V$ASCL2_05	ASCL2
Transfac.V$ASCL2_03	ASCL2
Transfac.V$FOXJ1_03	FOXJ1
Transfac.V$AR_Q6_01	AR
Transfac.V$TFIIA_Q6	GTF2A2
Transfac.V$FOXJ1_04	FOXJ1
Transfac.V$PDEF_02	SPDEF
Transfac.V$PDEF_01	SPDEF
Transfac.V$DBP_Q6_01	DBP
Transfac.V$OTX2_Q3_01	OTX2
Transfac.V$HOXB5_01	HOXB5
Transfac.V$FOXJ3_07	FOXJ3
Transfac.V$FOXJ3_06	FOXJ3
Transfac.V$HOXD1_01	HOXD1
Transfac.V$LEF1_Q5	LEF1
Transfac.V$FOXB1_02	FOXB1
Transfac.V$FOXB1_01	FOXB1
Transfac.V$FOXJ3_09	FOXJ3
Transfac.V$FOXJ3_08	FOXJ3
Transfac.V$LEF1_Q2	LEF1
Transfac.V$CPBP_Q6	KLF6
Transfac.V$VAX2_03	VAX2
Transfac.V$NFAT3_Q3	NFATC4
Transfac.V$SMAD4_04	SMAD3
Transfac.V$AR_Q2	AR
Transfac.V$SOX15_Q3	SOX15
Transfac.V$ATF1_Q6	ATF1
Transfac.V$GFI1_Q6	GFI1
Transfac.V$ZFP740_03	ZNF740
Transfac.V$ESRRA_05	ESRRA
Transfac.V$YY1_Q6_03	YY1
Transfac.V$YY1_Q6_02	YY1
Transfac.V$ZBED1_01	ZBED1
Transfac.V$ZFP740_04	ZNF740
Transfac.V$THRA_01	THRA
Transfac.V$PARP_Q3	COL11A2
Transfac.V$PARP_Q4	COL11A2
Transfac.V$FOXP3_03	FOXP3
Transfac.V$FOXP3_01	FOXP3
Transfac.V$TFE3_01	TFE3
Transfac.V$MAFB_Q4	MAFB
Transfac.V$AR_Q6	AR
Transfac.V$SOX11_05	SOX11
Transfac.V$SOX11_04	SOX11
Transfac.V$SOX11_03	SOX11
Transfac.V$NMYC_01	MYCN
Transfac.V$NMYC_02	MYCN
Transfac.V$PAX5_Q6	PAX5
Transfac.V$HOXA9_01	HOXA9
Transfac.V$TCF7L1_01	TCF7L1
Transfac.V$NFKB2_01	NFKB2
Transfac.V$NFIX_02	NFIX
Transfac.V$LHX9_03	LHX9
Transfac.V$LHX9_01	LHX9
Transfac.V$MIXL1_01	MIXL1
Transfac.V$FRA1_Q5	FOSL1
Transfac.V$JUND_Q6	JUND
Transfac.V$FRA1_Q6	FOSL1
Transfac.V$HOXA7_01	HOXA7
Transfac.V$HOXA7_02	HOXA7
Transfac.V$HOXA7_03	HOXA7
Transfac.V$NFKB_Q6_01	NFKB1
Transfac.V$ZNF143_03	ZNF143
Transfac.V$FOXP1_01	FOXP1
Transfac.V$IRXB3_01	IRX6
Transfac.V$ZNF333_01	ZNF333
Transfac.V$DLX5_03	DLX5
Transfac.V$DLX5_01	DLX5
Transfac.V$EBF_Q6	EBF1
Transfac.V$FREAC3_01	FOXC1
Transfac.V$NKX11_01	NKX1-1
Transfac.V$DLX7_01	DLX4
Transfac.V$KID3_01	ZNF354C
Transfac.V$BRN2_01	POU3F2
Transfac.V$ERBETA_Q5_01	ESR2
Transfac.V$ATF6_01	ATF6
Transfac.V$POU5F1B_01	POU5F1B
Transfac.V$POU5F1B_02	POU5F1B
Transfac.V$CEBPD_01	CEBPD
Transfac.V$CDPCR3HD_01	CUX1
Transfac.V$SPIC_02	SPIC
Transfac.V$SPIC_01	SPIC
Transfac.V$ZBTB7C_Q2	ZBTB7C
Transfac.V$CMYC_01	MYC
Transfac.V$CMYC_02	MYC
Transfac.V$ZFP740_05	ZNF740
Transfac.V$SOX9_03	SOX9
Transfac.V$ER71_02	ETV2
Transfac.V$HNF4ALPHA_Q6	HNF4A
Transfac.V$STAT_01	SOAT1
Transfac.V$SOX9_06	SOX9
Transfac.V$PIT1_01	SLC20A1
Transfac.V$NRSF_01	REST
Transfac.V$GATA_Q6	QRSL1
Transfac.V$CMYB_01	MYB
Transfac.V$TCF1_06	HNF1A
Transfac.V$TCF1_07	HNF1A
Transfac.V$POU6F2_01	POU6F2
Transfac.V$POU6F2_02	POU6F2
Transfac.V$TFEA_Q6	TFE3
Transfac.V$PBX1_04	PBX1
Transfac.V$SF1_Q6_01	SF1
Transfac.V$IRF3_06	IRF3
Transfac.V$IRF3_07	IRF3
Transfac.V$NFE2_03	NFE2
Transfac.V$NFE2_01	NFE2
Transfac.V$ISL1_Q6	ISL1
Transfac.V$ISL1_Q3	ISL1
Transfac.V$UNCX_04	UNCX
Transfac.V$UNCX_05	UNCX
Transfac.V$FLI1_03	FLI1
Transfac.V$IK_Q5	IKZF1
Transfac.V$JDP2_01	JDP2
Transfac.V$JDP2_02	JDP2
Transfac.V$UNCX_03	UNCX
Transfac.V$CEBPB_03	CEBPB
Transfac.V$HOXB3_03	HOXB3
Transfac.V$HOXB3_01	HOXB3
Transfac.V$PU1_Q6	SPI1
Transfac.V$SOX17_08	SOX17
Transfac.V$GLIS2_04	GLIS2
Transfac.V$GLIS2_05	GLIS2
Transfac.V$GLIS2_03	GLIS2
Transfac.V$SOX8_03	SOX8
Transfac.V$ERR3_Q2_01	ESRRG
Transfac.V$SOX8_06	SOX8
Transfac.V$HOX13_01	HOXA5
Transfac.V$SOX8_04	SOX8
Transfac.V$SOX8_05	SOX8
Transfac.V$RFX4_03	RFX4
Transfac.V$RFX4_04	RFX4
Transfac.V$RFX4_05	RFX4
Transfac.V$RFX4_06	RFX4
Transfac.V$P63_01	CKAP4
Transfac.V$MAZ_Q6	MAZ
Transfac.V$SIX4_01	SIX4
Transfac.V$FOXI1_03	FOXI1
Transfac.V$E2F1_Q6_01	E2F1
Transfac.V$TBX21_01	TBX21
Transfac.V$TBX21_02	TBX21
Transfac.V$TBX21_03	TBX21
Transfac.V$PITX3_Q2	PITX3
Transfac.V$HIC2_01	HIC2
Transfac.V$NKX61_03	NKX6-1
Transfac.V$NKX61_02	NKX6-1
Transfac.V$NKX61_01	NKX6-1
Transfac.V$NKX61_07	NKX6-1
Transfac.V$TCF4_04	TCF4
Transfac.V$TCF4_01	TCF7L2
Transfac.V$MAZ_Q6_01	MAZ
Transfac.V$SIX6_08	SIX6
Transfac.V$GCNF_Q3	NR6A1
Transfac.V$SOX10_Q6	SOX10
Transfac.V$NKX63_01	NKX6-3
Transfac.V$GLIS3_01	GLIS3
Transfac.V$ESRRB_02	ESRRB
Transfac.V$TEF5_Q2	TEAD3
Transfac.V$COE1_Q6	EBF1
Transfac.V$TTF1_Q6	TTF1
Transfac.V$SP4_Q5	SP4
Transfac.V$TTF1_Q5	TTF1
Transfac.V$RFX2_02	RFX2
Transfac.V$RFX2_03	RFX2
Transfac.V$RFX2_01	RFX2
Transfac.V$RFX2_04	RFX2
Transfac.V$GLIS1_01	GLIS1
Transfac.V$AML2_Q3	RUNX3
Transfac.V$SP2_Q3	SP2
Transfac.V$HLF_04	HLF
Transfac.V$HLF_01	HLF
Transfac.V$HSF1_Q6_01	HSF1
Transfac.V$PRDM1_02	PRDM1
Transfac.V$OLIG3_01	OLIG3
Transfac.V$PITX1_Q6	PITX1
Transfac.V$HNF1A_01	HNF1A
Transfac.V$HNF1A_03	HNF1A
Transfac.V$HNF1B_04	HNF1B
Transfac.V$HNF1B_06	HNF1B
Transfac.V$HNF1B_07	HNF1B
Transfac.V$PRRX2_03	PRRX2
Transfac.V$NEUROD2_01	NEUROD2
Transfac.V$GLI_Q6	GLI1
Transfac.V$GLI_Q2	GLI1
Transfac.V$KLF7_04	KLF7
Transfac.V$TR4_Q2	NR2C2
Transfac.V$KLF7_03	KLF7
Transfac.V$FOXO1A_Q5	FOXO1
Transfac.V$SMAD1_Q6	SMAD1
Transfac.V$TEL2_Q6	ETV7
Transfac.V$VDR_Q6	VDR
Transfac.V$MSX1_05	MSX1
Transfac.V$MSX1_04	MSX1
Transfac.V$TBX22_01	TBX22
Transfac.V$TBP_06	TBP
Transfac.V$TBP_04	TBP
Transfac.V$TBP_01	TBP
Transfac.V$LHX6_06	LHX6
Transfac.V$LHX6_07	LHX6
Transfac.V$LHX6_05	LHX6
Transfac.V$NKX32_06	NKX3-2
Transfac.V$NKX32_02	NKX3-2
Transfac.V$NKX32_01	NKX3-2
Transfac.V$SOX18_Q5	SOX18
Transfac.V$GATA4_02	GATA4
Transfac.V$RFXDC2_04	RFX7
Transfac.V$ESRRA_03	ESRRA
Transfac.V$ALX3_04	ALX3
Transfac.V$ESRRA_04	ESRRA
Transfac.V$ALX3_01	ALX3
Transfac.V$HEN2_Q2	NHLH2
Transfac.V$ALX3_03	ALX3
Transfac.V$INSM1_01	INSM1
Transfac.V$GATA1_Q6	GATA1
Transfac.V$ESRRA_07	ESRRA
Transfac.V$MAFB_08	MAFB
Transfac.V$ALX1_06	ALX1
Transfac.V$ALX1_07	ALX1
Transfac.V$ALX1_05	ALX1
Transfac.V$CREB_Q4	CREB1
Transfac.V$CREB_Q3	CREB1
Transfac.V$CREB_Q2	CREB1
Transfac.V$ER_Q6	ESR1
Transfac.V$NKX31_02	NKX3-1
Transfac.V$FOXO1_05	FOXO1
Transfac.V$NKX31_06	NKX3-1
Transfac.V$AR_09	AR
Transfac.V$AR_08	AR
Transfac.V$MAFG_01	MAFG
Transfac.V$TEF1_Q6_03	TEAD1
Transfac.V$AR_01	AR
Transfac.V$DAX1_01	NR0B1
Transfac.V$AR_03	AR
Transfac.V$AR_02	AR
Transfac.V$AR_04	AR
Transfac.V$NR2F1_04	NR2F1
Transfac.V$DPRX_01	DPRX
Transfac.V$RNF96_01	TRIM28
Transfac.V$HOXD9_Q2	HOXD9
Transfac.V$FOXG1_02	FOXG1
Transfac.V$FOXG1_03	FOXG1
Transfac.V$FOXG1_01	FOXG1
Transfac.V$ZNF219_01	ZNF219
Transfac.V$FOXG1_04	FOXG1
Transfac.V$FOXG1_05	FOXG1
Transfac.V$FRA1_Q6_01	FOSL1
Transfac.V$NR2F1_02	NR2F1
Transfac.V$FOXC1_02	FOXC1
Transfac.V$NANOG_01	NANOG
Transfac.V$NANOG_02	NANOG
Transfac.V$MTF1_Q4	MTF1
Transfac.V$TGIF_02	TGIF1
Transfac.V$ZIC4_01	ZIC4
Transfac.V$GABPA_06	GABPA
Transfac.V$BARHL2_01	BARHL2
Transfac.V$BARHL2_05	BARHL2
Transfac.V$BARHL2_04	BARHL2
Transfac.V$MGA_02	MGA
Transfac.V$MLX_01	MLX
Transfac.V$AP1_Q6	JUND
Transfac.V$AP1_Q4	JUND
Transfac.V$AP1_Q2	JUND
Transfac.V$EVX1_03	EVX1
Transfac.V$NFYA_Q5	NFYA
Transfac.V$LRF_Q2	CREBRF
Transfac.V$EVX2_01	EVX2
Transfac.V$EVX2_03	EVX2
Transfac.V$MSX2_03	MSX2
Transfac.V$SOX3_03	SOX3
Transfac.V$SOX3_02	SOX3
Transfac.V$SOX3_01	SOX3
Transfac.V$ESRRG_02	ESRRG
Transfac.V$ESRRG_03	ESRRG
Transfac.V$ESRRG_01	ESRRG
Transfac.V$PROX1_01	PROX1
Transfac.V$PXRRXR_02	NR1I2
Transfac.V$LHX9_04	LHX9
Transfac.V$MTERF_01	MTERF
Transfac.V$CLOCK_01	CLOCK
Transfac.V$MYOD_Q6	MYOD1
Transfac.V$XBP1_01	XBP1
Transfac.V$XBP1_02	XBP1
Transfac.V$XBP1_05	XBP1
Transfac.V$XBP1_04	XBP1
Transfac.V$CRX_02	CRX
Transfac.V$HNF4_01	HNF4A
Transfac.V$DRGX_01	DRGX
Transfac.V$STRA13_01	STRA13
Transfac.V$EGR3_Q3	EGR3
Transfac.V$SCRT2_01	SCRT2
Transfac.V$RUNX3_03	RUNX3
Transfac.V$HES1_Q6	HES1
Transfac.V$NET_Q6	SLC6A2
Transfac.V$HES1_Q2	HES1
Transfac.V$HOXB9_01	HOXB9
Transfac.V$RUNX3_01	RUNX3
Transfac.V$SCRT1_01	SCRT1
Transfac.V$LEF1_03	LEF1
Transfac.V$TBX5_Q2	TBX5
Transfac.V$ERM_02	ETV5
Transfac.V$ERM_01	ETV5
Transfac.V$TBX5_Q5	TBX5
Transfac.V$DMRT1_01	DMRT1
Transfac.V$BRN1_Q6	POU3F3
Transfac.V$FOXO1_02	FOXO1
Transfac.V$FOXO1_03	FOXO1
Transfac.V$FOXO1_01	FOXO1
Transfac.V$FOXO1_06	FOXO1
Transfac.V$FOXO1_07	FOXO1
Transfac.V$FOXO1_04	FOXO1
Transfac.V$DMRT2_01	DMRT2
Transfac.V$DPRX_02	DPRX
Transfac.V$POU4F3_02	POU4F3
Transfac.V$SOX40_04	SOX30
Transfac.V$ID4_01	ID4
Transfac.V$ZBTB18_01	ZBTB18
Transfac.V$ERR1_Q3	ESRRA
Transfac.V$ERR1_Q2	ESRRA
Transfac.V$HOXB5_03	HOXB5
Transfac.V$CREB3L1_01	CREB3L1
Transfac.V$CREB3L1_02	CREB3L1
Transfac.V$LHX2_02	LHX2
Transfac.V$LHX2_03	LHX2
Transfac.V$LHX2_01	LHX2
Transfac.V$AREB6_01	ZEB1
Transfac.V$AREB6_03	ZEB1
Transfac.V$AREB6_02	ZEB1
Transfac.V$AREB6_04	ZEB1
Transfac.V$MYCN_01	MYCN
Transfac.V$DEAF1_01	DEAF1
Transfac.V$CRX_Q4_01	CRX
Homeodomain.UP00008_1	SIX6
Homeodomain.UP00008_2	SIX6
Homeodomain.UP00017_1	NKX3-1
Homeodomain.UP00089_1	HNF1A
Homeodomain.UP00104_1	HMX1
Homeodomain.UP00105_1	POU3F4
Homeodomain.UP00106_1	VAX2
Homeodomain.UP00107_1	NKX2-4
Homeodomain.UP00108_1	ALX3
Homeodomain.UP00110_1	DLX4
Homeodomain.UP00111_1	DMBX1
Homeodomain.UP00112_1	GSC
Homeodomain.UP00113_1	HOXC4
Homeodomain.UP00114_1	HOMEZ
Homeodomain.UP00115_1	LHX2
Homeodomain.UP00117_1	HOXD11
Homeodomain.UP00118_1	POU4F3
Homeodomain.UP00119_1	NKX2-8
Homeodomain.UP00120_1	LBX2
Homeodomain.UP00121_1	HOXD10
Homeodomain.UP00122_1	TGIF1
Homeodomain.UP00123_1	MNX1
Homeodomain.UP00124_1	PDX1
Homeodomain.UP00125_1	PITX2
Homeodomain.UP00126_1	DLX2
Homeodomain.UP00127_1	GSX2
Homeodomain.UP00128_1	POU3F2
Homeodomain.UP00129_1	POU3F1
Homeodomain.UP00130_1	LHX3
Homeodomain.UP00131_1	GBX2
Homeodomain.UP00132_1	EVX2
Homeodomain.UP00133_1	CDX2
Homeodomain.UP00134_1	HOXB13
Homeodomain.UP00135_1	HOXC12
Homeodomain.UP00136_1	PRRX2
Homeodomain.UP00137_1	HOXB3
Homeodomain.UP00140_1	HOXD1
Homeodomain.UP00141_1	VSX1
Homeodomain.UP00142_1	UNCX
Homeodomain.UP00144_1	HOXB4
Homeodomain.UP00145_1	BARHL2
Homeodomain.UP00146_1	POU6F1
Homeodomain.UP00146_2	POU6F1
Homeodomain.UP00147_1	NKX2-6
Homeodomain.UP00148_1	HDX
Homeodomain.UP00149_1	PHOX2B
Homeodomain.UP00150_1	IRX6
Homeodomain.UP00151_1	BARX2
Homeodomain.UP00152_1	ARX
Homeodomain.UP00153_1	PITX1
Homeodomain.UP00154_1	DLX3
Homeodomain.UP00155_1	HMX2
Homeodomain.UP00156_1	MSX2
Homeodomain.UP00157_1	HMX3
Homeodomain.UP00158_1	POU1F1
Homeodomain.UP00159_1	SIX2
Homeodomain.UP00161_1	HMBOX1
Homeodomain.UP00162_1	EVX1
Homeodomain.UP00163_1	EN2
Homeodomain.UP00164_1	HOXA7
Homeodomain.UP00164_2	HOXA7
Homeodomain.UP00165_1	NKX2-1
Homeodomain.UP00166_1	BARHL1
Homeodomain.UP00167_1	EN1
Homeodomain.UP00168_1	HOXD8
Homeodomain.UP00169_1	LMX1B
Homeodomain.UP00170_1	ISL2
Homeodomain.UP00172_1	PROP1
Homeodomain.UP00173_1	HOXC13
Homeodomain.UP00174_1	HOXA2
Homeodomain.UP00175_1	LHX9
Homeodomain.UP00176_1	CRX
Homeodomain.UP00177_1	HOXD12
Homeodomain.UP00178_1	NOBOX
Homeodomain.UP00179_1	POU2F3
Homeodomain.UP00180_1	HOXD13
Homeodomain.UP00181_1	BARX1
Homeodomain.UP00182_1	HOXA6
Homeodomain.UP00183_1	HOXA13
Homeodomain.UP00184_1	LHX8
Homeodomain.UP00185_1	PBX1
Homeodomain.UP00186_1	MEIS1
Homeodomain.UP00187_1	ALX4
Homeodomain.UP00188_1	LMX1A
Homeodomain.UP00189_1	HOXA5
Homeodomain.UP00190_1	NKX2-3
Homeodomain.UP00191_1	POU2F2
Homeodomain.UP00192_1	SIX1
Homeodomain.UP00194_1	IRX4
Homeodomain.UP00195_1	SIX3
Homeodomain.UP00196_1	HOXA4
Homeodomain.UP00197_1	HOXC9
Homeodomain.UP00199_1	SIX4
Homeodomain.UP00200_1	NKX6-1
Homeodomain.UP00200_2	NKX6-1
Homeodomain.UP00201_1	EMX2
Homeodomain.UP00202_1	DLX1
Homeodomain.UP00203_1	PKNOX1
Homeodomain.UP00204_1	GBX1
Homeodomain.UP00205_1	PKNOX2
Homeodomain.UP00206_1	HOXB7
Homeodomain.UP00207_1	HOXB9
Homeodomain.UP00209_1	ALX1
Homeodomain.UP00209_2	ALX1
Homeodomain.UP00211_1	POU3F3
Homeodomain.UP00212_1	LHX5
Homeodomain.UP00213_1	HOXA9
Homeodomain.UP00214_1	HOXB5
Homeodomain.UP00215_1	VAX1
Homeodomain.UP00217_1	HOXA10
Homeodomain.UP00218_1	DBX2
Homeodomain.UP00220_1	NKX1-1
Homeodomain.UP00221_1	PHOX2A
Homeodomain.UP00222_1	HNF1B
Homeodomain.UP00223_1	IRX3
Homeodomain.UP00223_2	IRX3
Homeodomain.UP00224_1	PAX6
Homeodomain.UP00225_1	HLX
Homeodomain.UP00228_1	NKX3-2
Homeodomain.UP00229_1	OTX1
Homeodomain.UP00230_1	DLX5
Homeodomain.UP00231_1	NKX2-2
Homeodomain.UP00233_1	MEOX1
Homeodomain.UP00234_1	MSX1
Homeodomain.UP00235_1	HOXC11
Homeodomain.UP00236_1	IRX2
Homeodomain.UP00237_1	OTP
Homeodomain.UP00238_1	NKX6-3
Homeodomain.UP00240_1	CDX1
Homeodomain.UP00241_1	HOXD3
Homeodomain.UP00242_1	HOXC8
Homeodomain.UP00243_1	ISX
Homeodomain.UP00244_1	TLX2
Homeodomain.UP00245_1	HOXC10
Homeodomain.UP00246_1	HOXA11
Homeodomain.UP00247_1	PAX4
Homeodomain.UP00248_1	PAX7
Homeodomain.UP00249_1	NKX2-5
Homeodomain.UP00250_1	IRX5
Homeodomain.UP00251_1	ESX1
Homeodomain.UP00252_1	HOXC5
Homeodomain.UP00253_1	RAX
Homeodomain.UP00254_1	POU2F1
Homeodomain.UP00256_1	LHX6
Homeodomain.UP00256_2	LHX6
Homeodomain.UP00257_1	SHOX2
Homeodomain.UP00259_1	HOXB6
Homeodomain.UP00260_1	HOXC6
Homeodomain.UP00261_1	LHX4
Homeodomain.UP00262_1	LHX1
Homeodomain.UP00263_1	HOXB8
Homeodomain.UP00264_1	HOXA1
Homeodomain.UP00265_1	PITX3
Homeodomain.UP00266_1	PRRX1
Homeodomain.UP00267_1	OTX2
Homeodomain.UP00391_1	HOXA3
JASPAR2014.MA0002.2	RUNX1
JASPAR2014.MA0003.2	TFAP2A
JASPAR2014.MA0004.1	ARNT
JASPAR2014.MA0007.2	AR
JASPAR2014.MA0009.1	T
JASPAR2014.MA0014.2	PAX5
JASPAR2014.MA0017.1	NR2F1
JASPAR2014.MA0018.2	CREB1
JASPAR2014.MA0024.2	E2F1
JASPAR2014.MA0025.1	NFIL3
JASPAR2014.MA0027.1	EN1
JASPAR2014.MA0028.1	ELK1
JASPAR2014.MA0029.1	MECOM
JASPAR2014.MA0030.1	FOXF2
JASPAR2014.MA0031.1	FOXD1
JASPAR2014.MA0032.1	FOXC1
JASPAR2014.MA0033.1	FOXL1
JASPAR2014.MA0035.3	GATA1
JASPAR2014.MA0036.2	GATA2
JASPAR2014.MA0037.2	GATA3
JASPAR2014.MA0038.1	GFI1
JASPAR2014.MA0039.2	KLF4
JASPAR2014.MA0040.1	FOXQ1
JASPAR2014.MA0041.1	FOXD3
JASPAR2014.MA0042.1	FOXI1
JASPAR2014.MA0043.1	HLF
JASPAR2014.MA0046.1	HNF1A
JASPAR2014.MA0047.2	FOXA2
JASPAR2014.MA0048.1	NHLH1
JASPAR2014.MA0050.2	IRF1
JASPAR2014.MA0051.1	IRF2
JASPAR2014.MA0052.2	MEF2A
JASPAR2014.MA0056.1	MZF1
JASPAR2014.MA0057.1	MZF1
JASPAR2014.MA0058.2	MAX
JASPAR2014.MA0060.2	NFYA
JASPAR2014.MA0062.2	GABPA
JASPAR2014.MA0063.1	NKX2-5
JASPAR2014.MA0066.1	PPARG
JASPAR2014.MA0067.1	PAX2
JASPAR2014.MA0068.1	PAX4
JASPAR2014.MA0069.1	PAX6
JASPAR2014.MA0070.1	PBX1
JASPAR2014.MA0071.1	RORA
JASPAR2014.MA0072.1	RORA
JASPAR2014.MA0073.1	RREB1
JASPAR2014.MA0075.1	PRRX2
JASPAR2014.MA0076.2	ELK4
JASPAR2014.MA0077.1	SOX9
JASPAR2014.MA0078.1	SOX17
JASPAR2014.MA0079.3	SP1
JASPAR2014.MA0080.3	SPI1
JASPAR2014.MA0081.1	SPIB
JASPAR2014.MA0083.2	SRF
JASPAR2014.MA0084.1	SRY
JASPAR2014.MA0087.1	SOX5
JASPAR2014.MA0088.1	ZNF143
JASPAR2014.MA0090.1	TEAD1
JASPAR2014.MA0093.2	USF1
JASPAR2014.MA0095.2	YY1
JASPAR2014.MA0098.2	ETS1
JASPAR2014.MA0100.2	MYB
JASPAR2014.MA0101.1	REL
JASPAR2014.MA0102.3	CEBPA
JASPAR2014.MA0103.2	ZEB1
JASPAR2014.MA0104.3	MYCN
JASPAR2014.MA0105.3	NFKB1
JASPAR2014.MA0106.2	TP53
JASPAR2014.MA0107.1	RELA
JASPAR2014.MA0111.1	SPZ1
JASPAR2014.MA0112.2	ESR1
JASPAR2014.MA0113.2	NR3C1
JASPAR2014.MA0114.2	HNF4A
JASPAR2014.MA0117.1	MAFB
JASPAR2014.MA0122.1	NKX3-2
JASPAR2014.MA0124.1	NKX3-1
JASPAR2014.MA0125.1	NOBOX
JASPAR2014.MA0130.1	ZNF354C
JASPAR2014.MA0131.1	HINFP
JASPAR2014.MA0132.1	PDX1
JASPAR2014.MA0135.1	LHX3
JASPAR2014.MA0136.1	ELF5
JASPAR2014.MA0137.3	STAT1
JASPAR2014.MA0138.2	REST
JASPAR2014.MA0139.1	CTCF
JASPAR2014.MA0141.2	ESRRB
JASPAR2014.MA0143.3	SOX2
JASPAR2014.MA0144.2	STAT3
JASPAR2014.MA0146.2	ZFX
JASPAR2014.MA0147.2	MYC
JASPAR2014.MA0148.3	FOXA1
JASPAR2014.MA0150.2	NFE2L2
JASPAR2014.MA0151.1	ARID3A
JASPAR2014.MA0152.1	NFATC2
JASPAR2014.MA0153.1	HNF1B
JASPAR2014.MA0154.2	EBF1
JASPAR2014.MA0155.1	INSM1
JASPAR2014.MA0156.1	FEV
JASPAR2014.MA0157.1	FOXO3
JASPAR2014.MA0158.1	HOXA5
JASPAR2014.MA0160.1	NR4A2
JASPAR2014.MA0161.1	NFIC
JASPAR2014.MA0162.2	EGR1
JASPAR2014.MA0163.1	PLAG1
JASPAR2014.MA0164.1	NR2E3
JASPAR2014.MA0258.2	ESR2
JASPAR2014.MA0442.1	SOX10
JASPAR2014.MA0461.1	ATOH1
JASPAR2014.MA0463.1	BCL6
JASPAR2014.MA0464.1	BHLHE40
JASPAR2014.MA0465.1	CDX2
JASPAR2014.MA0466.1	CEBPB
JASPAR2014.MA0467.1	CRX
JASPAR2014.MA0469.1	E2F3
JASPAR2014.MA0470.1	E2F4
JASPAR2014.MA0471.1	E2F6
JASPAR2014.MA0472.1	EGR2
JASPAR2014.MA0473.1	ELF1
JASPAR2014.MA0474.1	ERG
JASPAR2014.MA0475.1	FLI1
JASPAR2014.MA0476.1	FOS
JASPAR2014.MA0477.1	FOSL1
JASPAR2014.MA0478.1	FOSL2
JASPAR2014.MA0479.1	FOXH1
JASPAR2014.MA0480.1	FOXO1
JASPAR2014.MA0481.1	FOXP1
JASPAR2014.MA0482.1	GATA4
JASPAR2014.MA0483.1	GFI1B
JASPAR2014.MA0484.1	HNF4G
[truncated: 1,161 more rows]
