# Supplementary material for: Models of human core transcriptional regulatory circuitries
Source: HighWire-hosted journal article supplement (doi:10.1101/gr.197590.115), 2016-02-03
Supplement: Table_S3.xlsx [file Table_S3.xlsx]

## Sheet: SE_TF
Astrocytes	BI_Adipose_Nuclei	BI_Brain_Angular_Gyrus	BI_Brain_Anterior_Caudate	BI_Brain_Cingulate_Gyrus	BI_Brain_Hippocampus_Middle	BI_Brain_Inferior_Temporal_Lobe	BI_Brain_Mid_Frontal_Lobe	BI_CD34_Primary_RO01480	BI_CD34_Primary_RO01536	BI_CD34_Primary_RO01549	BI_CD4_Memory_Primary_7pool	BI_CD4_Memory_Primary_8pool	BI_CD4_Naive_Primary_7pool	BI_CD4_Naive_Primary_8pool	BI_CD4p_CD225int_CD127p_Tmem	BI_CD4p_CD25-_CD45RAp_Naive	BI_CD4p_CD25-_CD45ROp_Memory	BI_CD4p_CD25-_Il17-_PMAstim_Th	BI_CD4p_CD25-_Il17p_PMAstim_Th17	BI_CD8_Memory_7pool	BI_CD8_Naive_7pool	BI_CD8_Naive_8pool	BI_Duodenum_Smooth_Muscle	BI_Skeletal_Muscle	BI_Stomach_Smooth_Muscle	CD14	CD19_primary	CD20	CD34_adult	CD34_fetal	CD3	CD56	CD8_primary	Colon_Crypt_1	Colon_Crypt_2	Colon_Crypt_3	DND41	Fetal_Intestine	Fetal_Intestine_Large	Fetal_muscle	Fetal_Thymus	GM12878	H1	H2171	HCC1954	HCT-116	HeLa	HepG2	HMEC
AFF3	ARID1B	ARID5B	ARID5B	ARID5B	ARNT2	ARID5B	BHLHE40	AHR	AHR	AHR	ARID5B	ARID5B	BACH2	BCL11B	BCL11B	BACH2	BATF	ARID5B	ARID5B	ARID1A	BACH2	BACH2	AHR	ARID5B	BARX1	ARID1A	ARID5B	AFF3	BCL11A	CIC	BACH2	BCL11B	BACH2	ATF3	ARID1B	ARID1A	BCL11A	ARID1A	ARID3A	ARID1A	ARID1A	ARID1B	AEBP2	BCL11A	BNC2	BHLHE40	AEBP2	ARID5B	ARID1B
ARID5B	ARID5B	BHLHE41	ARNT2	ATF1	ATF1	ARNT2	CIC	ARID5B	ARID1A	ARID5B	BCL11B	BCL11B	BCL11B	BCL6	BCLAF1	BCL11B	BCL11B	BACH2	ARNTL	BCL11B	BCL11B	BCL11B	ARID1A	BCL6	BCL11A	ATF7	BACH2	ARID1A	CIC	GATA5	BATF	BCL6	BATF	BHLHE40	ATF3	ATF3	BCL6	ARID3A	ARID5B	ARID5B	BACH2	ARID5B	ARID1A	ELF3	CEBPD	ELF3	ATF1	CEBPA	ARID5B
BCL6	BCL6	CIC	BCL11B	ATF7	BCL6	ATF1	ERF	CIC	ARID1B	BCL11A	BCL6	BCL6	BCL6	BCLAF1	BHLHE40	BCLAF1	BCLAF1	BATF	BACH2	BCL6	BCL6	BCL6	ARID5B	BCLAF1	BCL6	BACH1	BCL11A	ARID1B	ELF2	GFI1B	BCL11B	BCLAF1	BCL11B	CDX1	BHLHE40	BHLHE40	ELF1	ARID5B	BCL11A	ATF4	BCL11A	ELF1	ARID1B	ERF	EHF	FOSB	BHLHE40	CREB3L2	ARNTL
BHLHE40	BHLHE40	CREB5	BCL6	BHLHE41	BHLHE41	ATF7	HLF	DDIT3	ARID5B	BCLAF1	BCLAF1	BCLAF1	BCLAF1	BHLHE40	CIC	CREB1	BHLHE40	BCL11B	BATF	BCLAF1	BCLAF1	BCLAF1	BCL11A	BHLHE40	BHLHE40	BCL11A	BCLAF1	ARID5B	GATA5	IKZF1	BCL6	BHLHE40	BCL6	CDX2	CDX1	CDX1	ETS1	BCL11A	BCL6	BACH2	BCL11B	ETV6	BCL11A	FOSL2	ELF3	GLIS2	CREB3L1	EHF	ARNTL2
CIC	BHLHE41	HLF	BHLHE41	CIC	CIC	BCL11A	ID3	E2F3	BCL11A	ELF1	BHLHE40	ERF	ERF	CIC	CREB1	ELF1	ELF1	BCL6	BATF3	BHLHE40	CIC	ERF	BCL6	BHLHE41	CEBPD	BCL6	BHLHE40	BACH2	GFI1B	JUNB	BCLAF1	CIC	BCLAF1	CEBPA	CDX2	CDX2	ETS2	BCL6	BHLHE40	BCL6	E2F2	FOXN3	BNC2	FOXJ2	ETS2	HES4	EHF	ELF1	BCL6
CREB3L1	CEBPB	ID3	CREB5	CREB5	CREB3L2	BCL6	JUNB	ELF1	BCLAF1	ERG	CREB1	ETS1	ETS1	ETS1	ELF1	ETS1	ELK3	BCLAF1	BCL11B	DDIT3	ETS1	ETS1	BHLHE40	DDIT3	CREB3	BCLAF1	CREB1	BCL11A	HOXB2	KLF13	BHLHE40	CREM	BHLHE40	CEBPD	CEBPA	CEBPA	ETV6	BHLHE40	BHLHE41	BCLAF1	ELF1	HIVEP2	CREB3L2	INSM1	FOXA1	HOXB8	ELF3	ETS2	BCLAF1
CREB3L2	CEBPD	KLF13	DBP	FOXN2	CREB5	BCLAF1	KLF13	ERG	BHLHE40	ETS2	DDIT3	FOSB	FOS	FOS	ETS1	FOSB	ETS1	CREM	BCL6	ERF	FOS	FOSB	CDX1	ETS1	ELK3	BHLHE40	DDIT3	BCLAF1	ID2	KLF9	CIC	DDIT3	CREB1	CREB3L1	CEBPD	CEBPD	FLI1	BHLHE41	CDX1	BHLHE40	ETS1	IKZF2	CREB5	KLF13	FOXI1	ID1	ETS2	ETV5	BHLHE40
ELK3	CREB1	KLF9	ETV6	FOXO3	ERF	BHLHE41	KLF6	ETS2	DDIT3	ETV6	ELF1	FOXJ2	FOSB	FOSB	FOS	FOXJ2	FOSB	EGR2	BCLAF1	ETS1	FOSB	FOXJ2	CDX2	ETS2	ETV6	CEBPA	E2F5	CREB1	IKZF1	LYL1	CREB1	ELF1	DDIT3	E2F2	CEBPG	CEBPG	GATA3	CDX1	CDX2	CEBPD	ETV6	IKZF3	ELF2	MEF2D	GATA3	ID3	FOS	FOXA1	CEBPG
ETS1	CREB3L2	MAX	FOXK1	HMBOX1	FOSB	CREB5	KLF9	ETV6	E2F3	FOS	ERF	GATA3	FOXJ2	FOSL2	FOSB	FOXP1	FOXJ2	ELF1	BHLHE40	FOS	FOXJ2	GMEB2	CEBPD	ETV6	FOS	CEBPD	EGR3	DDIT3	JUNB	MXI1	ELF1	EOMES	EGR1	EHF	CREB3L1	ELF2	GFI1	CDX2	CEBPA	CIC	GFI1	IRF5	ETV1	MYT1L	GLIS3	JUNB	FOSL2	FOXQ1	CIC
FOS	EBF1	MEF2C	FOXN2	ID3	FOXO3	EGR1	MEF2C	FOS	ELF1	FOXP1	ETS1	GMEB2	FOXN3	FOXJ2	FOXJ2	GZF1	HIVEP2	ELK3	CREB1	FOSB	FOXN3	HBP1	CREB3	FOS	FOSL2	E2F2	ELF1	E2F5	KLF13	NFE2	ETS1	ETS1	ELF1	ELF3	EGR3	ELF3	HIVEP3	CEBPA	CEBPG	CREB3L1	HIVEP3	KLF13	FEZF1	NEUROD4	GRHL2	MNT	GATA2	GATA4	CREB1
FOSB	EBF3	MEF2D	FOXO3	IRF2	HMBOX1	ETV5	MEF2D	FOSB	ELK3	HOXA9	FOS	HBP1	FOXO3	FOXN3	GATA3	HIVEP2	IKZF1	ETS1	EGR1	FOSL2	HIVEP2	HIVEP2	CREB3L2	FOSB	FOXF2	E2F3	ERF	EBF1	KLF16	RREB1	FLI1	FLI1	ERF	ERF	ELF2	ERF	ID2	CEBPG	CREB3L1	CREB3L2	IKZF1	MEF2D	FOXD3	NEUROG1	HES1	MYC	GRHL3	HHEX	DLX2
FOSL2	ELK3	MXI1	HEY2	JUNB	ID3	ETV6	MNT	FOXP1	ERG	IKZF1	FOSB	HIVEP2	FOXP1	GATA3	HBP1	IKZF1	JUN	FLI1	EGR2	FOXN3	IKZF1	IKZF1	ELF1	FOSL2	HLF	ELF1	ETS1	EGR3	KLF6	STAT5A	FOS	FOSB	ETS1	ETS2	ELF3	ETS2	IKZF1	CREB3L1	CREB3L2	CREB5	IRF1	MSC	FOXN3	NFIA	HIF1A	NFIC	HES1	ID1	ELK3
FOXL1	ERF	NFIA	HMBOX1	KLF13	IRF1	FOXK2	NFIB	GATA2	ETS2	JUNB	FOXJ2	IKZF1	GATA3	GMEB2	HIVEP2	IRF1	JUNB	FOSL2	ELK3	HBP1	IRF1	IRF1	ELF3	FOXK1	HOXA3	ELK3	FLI1	ELF1	KLF9	TAL1	FOSB	FOSL2	FLI1	FOS	ELF4	FOS	IKZF2	CREB3L2	CREB3L3	DDIT3	KLF13	NR3C1	FOXO1	NFIX	HOXA3	NR2F1	HIF1A	ID2	ETS1
FOXP1	ERG	NFIB	ID3	KLF16	IRF2	FOXO3	NFIC	IKZF1	ETV6	KLF6	FOXN3	IRF1	HBP1	HBP1	IKZF1	JUN	JUND	FOXJ2	ETS1	HIVEP2	JUN	JUN	ELK3	FOXO3	HOXB2	ETV6	FOSB	ETS1	LYL1	THRA	HIVEP2	FOXJ2	FOSB	FOSB	ETS1	FOSB	IRF1	DDIT3	ELF1	EBF1	KLF7	PAX5	GLI2	NHLH1	ID1	ONECUT3	HOXB7	MNT	ETS2
GLI2	ESR1	NFIC	IRF1	KLF9	JUNB	HLF	NFIX	JUNB	FLI1	MEF2C	FOXO3	JUN	HIVEP2	HIVEP2	IRF1	JUNB	KLF13	FOXN3	FOSB	HOMEZ	JUNB	JUNB	ERF	HEY2	HOXB3	FLI1	FOXN3	FLI1	NFIA	ZNF273	HIVEP3	FOXO3	FOSL2	FOSL2	ETS2	FOSL2	IRX3	ELF1	ELF3	EBF2	LEF1	RORA	HES3	OLIG2	IKZF2	RARA	HOXC10	NANOG	FOS
GLIS1	ETS1	NFIX	IRF2	LYL1	KLF13	ID3	NR1D1	KLF6	FOS	MEF2D	GATA1	JUNB	IKZF1	HMBOX1	JUN	JUND	KLF2	FOXO1	FOSL2	HOXB2	KLF12	KLF13	ETS1	HIC1	ID2	FOS	FOXO1	FOS	PBX2	ZNF692	IKZF1	GZF1	FOXJ2	FOXA1	FOS	FOXA1	KLF12	ELF3	ETS2	EBF3	MEF2D	RREB1	ID1	RFX2	KLF10	RARG	ID1	NR1D1	FOSB
GLIS3	FLI1	NR1D1	JDP2	MAX	KLF15	IRF2	NR2F1	MEF2C	FOXK1	MEIS1	GATA3	KLF12	JUN	IKZF1	JUNB	KLF13	KLF6	GFI1	FOXJ2	ID2	KLF13	KLF2	ETS2	HIF1A	ID3	FOSB	GCM1	FOSB	RREB1		IKZF3	HBP1	GZF1	FOXA3	FOSB	FOXD2	KLF6	FOS	FOS	ELK3	NFATC3	RUNX3	ID3	RXRA	KLF5	SMAD3	ID3	NR2F2	FOSL2
HES1	FOSL2	NR2F1	JUNB	MEF2D	KLF9	JUNB	NR4A1	MEF2D	FOXP1	NFE2	HBP1	KLF13	JUNB	IRF1	KLF12	KLF2	KLF9	GZF1	FOXO1	IKZF1	KLF2	KLF3	ETV6	HIVEP2	ISL1	FOSL2	HIVEP2	FOXN2	SREBF1		IRF1	HIVEP2	HBP1	FOXD2	FOSL2	FOXK1	LEF1	FOSL2	FOSL2	ERG	NFX1	SMAD3	LHX5	SCRT2	MESP2	SOX12	JUNB	NR5A1	GLI3
HIC1	FOXO1	POU3F3	KLF13	MEIS2	LYL1	KLF13	POU3F3	MEIS1	GATA2	NFE2L2	HIVEP1	KLF2	KLF13	JUN	KLF13	KLF6	MEF2D	HBP1	FOXP1	IRF1	KLF3	KLF6	FOS	HOXC4	ISL2	FOXK1	HMBOX1	FOXN3	STAT5A		JUN	HIVEP3	HIVEP2	FOXK2	FOXA1	FOXO1	MYB	FOXA1	FOXA1	ETS1	NR1D1	TFEB	LIN28A	SP3	MYC	SP1	KLF10	OSR1	GRHL2
HIF1A	FOXO3	RARA	KLF9	MITF	MAX	KLF9	SOX10	NFE2	HBP1	RARA	HIVEP2	KLF6	KLF2	JUNB	KLF2	KLF9	MNT	HIVEP2	HBP1	JUN	KLF6	KLF9	FOSL2	JUN	JUN	FOXN2	ID3	GZF1	TAL1		JUNB	ID2	HIVEP3	FOXP1	FOXA3	FOXO3	NR2C2	FOXO3	FOXO3	ETV1	NR3C1	ZBTB38	LIN28B	SPDEF	NFIB	SREBF1	KLF5	PROX1	GRHL3
HIVEP2	HBP1	RBPJ	MAX	MXI1	MEF2D	MAX	SOX2	NFYA	HIVEP1	REL	HOMEZ	KLF9	KLF3	KLF12	KLF6	LEF1	NFATC2	IKZF1	HIVEP2	JUNB	KLF7	LEF1	FOXO3	JUNB	JUNB	FOXO3	IKZF1	HIF1A	THRA		KLF12	IKZF1	HMBOX1	GATA6	FOXD2	FOXP1	PRDM8	FOXP1	FOXP1	ETV6	RFX3	ZNF217	MYB	SREBF1	PBX1	TCF7L2	KLF9	RERE	HES1
HOXA2	HIF1A	RERE	MEF2D	NFIA	MNT	MEF2D	SOX8	RARA	HOXA7	RFX2	HOXB2	MNT	KLF6	KLF13	KLF9	MEF2D	NFKB2	IKZF3	ID2	JUND	KLF9	MEF2D	GATA6	KLF13	KLF10	HIVEP3	IKZF3	HIVEP2	TSC22D3		KLF13	IKZF2	IKZF1	HES1	FOXK2	GATA6	RORB	FOXP4	FOXP4	FLI1	RREB1		MYF5	ST18	POU1F1	TEAD3	MAFK	RFX3	HIF1A
HOXB2	HOXA4	SOX2	MEIS2	NFIB	MXI1	MEIS2	TCF4	REL	HOXB2	RFX3	ID3	NFKB2	KLF9	KLF2	MEF2D	MNT	NR1D1	IRF4	IKZF1	KLF13	LEF1	MNT	HAND2	KLF6	KLF6	ID2	IRF1	HMBOX1	ZBTB7B		KLF2	IRF1	IKZF3	HIC1	FOXO3	GRHL2	RORC	GATA4	GATA5	FOS	SATB1		NANOG	STAT5B	RARA	TGIF1	MEF2D	RREB1	HIVEP1
ID3	HOXB4	SOX8	MXI1	NFIC	NFIA	MITF	TEF	RFX2	IKZF1	RUNX1	IKZF1	NR1D1	LEF1	KLF3	NFATC1	NFKB2	NR4A2	IRF8	IKZF3	KLF2	MEF2D	NFKB2	HIC1	KLF9	KLF7	IKZF1	IRF2	ID3	ZEB2		KLF3	IRF2	IRF1	HNF1B	FOXP1	HES1	SOX4	GATA5	GATA6	FOSB	SOX4		NR2F6	TCF4	RUNX1	UBTF	MNT	TBX2	HOXA2
KLF12	HOXC6	SREBF1	NFIA	NFIX	NFIC	MNT	TFEB	RFX3	IRF1	STAT5A	IKZF4	NR3C2	MEF2D	KLF6	NFATC2	NR1D1	PBX2	JUNB	JUN	KLF6	MZF1	NR4A2	HIF1A	MAF	KLF9	IRF1	IRF5	IKZF1	ZFPM1		KLF6	JUN	JUN	HOXA10	FOXP2	HIVEP1	STAT1	GATA6	HBP1	FOSL2	STAT5A		NR5A1	THRA	RUNX2	ZBTB7B	MYC	TBX3	HOXA5
KLF6	HOXC9	ST18	NFIB	NKX2-2	NFIX	MXI1	THRA	RREB1	JUNB	TAL1	IRF1	NR4A2	MNT	KLF9	NFE2L2	NR4A2	RARA	KLF12	JUNB	KLF9	NFKB2	RARA	HLX	MAFA	MEF2D	IRF2	IRF8	IKZF3	ZNF217		KLF9	JUNB	JUNB	HOXA11-AS1	GATA6	HIVEP2	WT1	HBP1	HES1	FOXJ2	TCF7		PBX1	UNCX	RXRA	ZIC5	NFX1	TOX3	IRX1
KLF7	IRF1	TCF12	NFIC	NKX6-2	NKX2-2	NFIA	ZBTB16	RUNX1	JUND	XBP1	JUN	PRDM1	MXI1	MEF2D	NFKB1	RARA	REL	KLF13	KLF10	MEF2D	NR3C2	RFX3	HOXA2	MAFK	MEIS1	IRF5	JUN	IRF2			MEF2D	KLF13	KLF13	HOXA13	HES1	HNF1B	XBP1	HES1	HIC1	FOXN3	XBP1		POU5F1	ZBTB20	SMAD3	ZNF213	NFYA	XBP1	IRX2
KLF9	KLF11	TCF4	NFIX	NPAS3	NKX6-2	NFIB	ZBTB47	RUNX2	KLF6	ZEB2	JUNB	RARA	MZF1	MNT	NFKB2	REL	RFX1	KLF6	KLF12	MLXIP	NR4A2	RUNX3	HOXA3	MEF2C	MEIS2	IRF8	JUNB	IRF5			NFATC1	KLF2	KLF2	ID1	HIC1	HOXA9	ZNF217	HIC1	HIVEP1	FOXO3	ZBTB1		PRDM14	ZBTB7B	SOX9		NR1D1	YY1	IRX4
MAFF	KLF13	TEF	NKX6-2	NR4A1	NR1D1	NFIC	ZBTB7A	RUNX3	KLF7	ZNF217	JUND	RFX3	NFE2L2	NFATC2	NR1D1	RFX1	RFX3	KLF9	KLF13	MNT	PRDM2	SATB1	HOXA4	MEF2D	MLXIP	JUNB	KLF13	IRF8			NFATC2	KLF6	KLF6	ID2	HIVEP2	HOXB7	ZNF236	HIVEP1	HNF1B	GABPA	ZNF217		RARB	ZHX2	SP3		NR4A1	ZNF217	IRX5
MAFK	KLF6	TFEB	NPAS3	OLIG1	NR2F1	NFIX	ZBTB7B	STAT5A	KLF9	ZNF267	KLF12	RORA	NFKB2	NFKB2	NR4A2	RFX3	RORA	LEF1	KLF2	MZF1	RARA	STAT3	HOXB2	MLXIP	MNT	KLF13	KLF2	JUN			NFKB1	KLF9	KLF9	ID3	HNF1B	ID1	ZNF479	HNF4G	HNF4G	HBP1	ZNF280D		RARG	ZNF337	SREBF1		NR4A2	ZNF444	JUN
MEF2D	KLF7	THRA	NR1D1	POU3F3	NR2F2	NR1D1	ZEB2	TGIF1	LYL1	ZNF445	KLF13	RUNX3	NR3C2	NR4A2	RARA	SATB1	RUNX3	MEF2D	KLF6	NFATC2	RFX3	TCF7	HOXB3	MNT	MXI1	KLF4	KLF6	JUNB			NFKB2	MEF2D	LEF1	IRF1	ID1	ID2	ZNF596	HOXA3	HOXB2	HIC1	ZNF496		RBPJ	ZNF536	STAT4		ONECUT2	ZNF563	JUNB
MEIS1	KLF9	TSC22D3	NR4A1	PROX1	NR4A1	NR4A1	ZHX3	XBP1	MEF2C	ZNF521	KLF16	STAT5B	NR4A2	PRDM1	RARG	SREBF1	SMAD3	MYC	KLF9	NFATC3	RUNX3	TGIF1	ID3	MYF6	NFIC	KLF6	KLF8	KLF13			NR1D1	MNT	MEF2D	JUN	ID2	ID3		HOXB2	ID1	HIF1A			RCOR2		TFAP2A		PBX1	ZNF92	KLF10
MNT	LYL1	VEZF1	POU3F2	RBPJ	OLIG1	OLIG1	ZNF532	ZEB2	MEF2D		KLF2	TCF7	RARA	PRDM2	REL	STAT1	STAT1	NFATC1	MAF	NFE2	SATB1	TSC22D3	IRF1	MYOD1	NFIX	MAFB	KLF9	KLF2			NR4A2	MZF1	MNT	JUNB	ID3	IRF2		ID1	ID2	HIVEP1			RFX7		TFAP2C		PITX1		KLF13
MYC	MEF2D	ZBTB16	POU3F3	RERE	POU3F2	PBX1		ZNF217	MEIS1		KLF6	TGIF1	RFX3	RARA	RFX3	STAT5B	STAT4	NFATC3	MEF2D	NFKB2	TCF7	ZBTB25	IRF2	NFE2L1	NFKB2	MAX	LYL1	KLF6			PBX4	NFATC2	MZF1	JUND	IRF1	IRF7		ID2	ID3	HIVEP2			RORA		TGIF1		RARA		KLF4
NFIX	MNT	ZBTB17	PROX1	RXRA	POU3F3	POU3F2		ZNF267	MYB		KLF9	TSC22D3	SATB1	REL	RORA	TCF7	STAT5B	NFKB1	MNT	NR1D1	TGIF1	ZHX2	JUNB	NFIA	NR2F2	MEF2D	MEF2C	KLF7			RARA	NFATC3	NFATC2	KLF13	IRF2	JUN		ID3	IKZF4	HOXA10			RORB		TP63		RREB1		KLF5
NR2F1	NFE2L1	ZBTB47	RARA	SALL1	PROX1	POU3F3		ZNF445	NFATC2		MEF2D	UBTF	STAT5B	RFX3	RUNX3	USF1	TCF7	NR3C1	MYC	NR1H2	TSC22D3	ZNF184	KLF13	NFIB	NR4A1	MNT	MEF2D	KLF9			RARG	NFKB2	NFATC3	KLF16	JUN	JUNB		IRF1	IRF1	HOXA6			SALL2		TSC22D1		RXRA		KLF6
NR2F2	NFIA	ZBTB7A	RBPJ	SOX10	RARA	PROX1		ZNF521	NFE2		MLXIP	ZBTB25	TCF7	RORA	SMAD3	YY1	TGIF1	NR4A2	NFATC1	NR3C1	ZBTB25	ZNF217	KLF5	NFIC	NR4A2	MXD1	MYBL2	MEF2C			RFX1	NFX1	NFE2L2	KLF4	JUND	KLF10		IRF2	IRF2	HOXB2			SALL4		XBP1		SMAD2		KLF7
PRRX1	NFIB	ZBTB7B	RERE	SOX12	RERE	RARA			NFX1		MNT	ZBTB38	TGIF1	RUNX3	STAT4	ZBTB1	ZBTB1	PBX4	NFATC2	NR4A2	ZFP64	ZNF331	KLF6	NFIX	PBX1	PBX2	NFATC1	MEF2D			RFX3	NFYA	NFKB2	KLF5	KLF10	KLF13		JUN	JUN	HOXC6			SIX3		ZNF217		SMAD3		KLF9
RERE	NFIC	ZEB2	SOX10	SOX2	RXRA	RERE			NFYA		MXI1	ZHX2	TOX2	RXRA	STAT5B	ZBTB7B	ZBTB7B	PLAGL2	NFATC3	RARA	ZHX2		KLF7	NR1D1	RARA	RARA	NFE2L2	MNT			RORA	NR1D1	NFX1	KLF6	KLF12	KLF16		KLF13	KLF13	HOXD8			SOX1		ZNF532		SOX13		MAFF
RFX3	NFIL3	ZFHX2	SOX12	SOX8	SOX10	RXRA			NR3C1		MZF1	ZNF184	TSC22D3	STAT4	TCF7	ZHX2	ZHX2	POU2F2	NFE2L2	REL	ZNF184		KLF9	NR2F2	RERE	RBPJ	NFKB2	MZF1			RUNX3	NR3C1	NFYA	KLF9	KLF13	KLF4		KLF5	KLF5	ID2			SOX11				SOX7		MNT
RUNX1	NR2F2	ZHX2	SOX13	ST18	SOX12	SOX10			PBX2		NFATC2	ZNF217	ZBTB25	STAT5B	TGIF1	ZNF217	ZNF217	PRDM1	NFKB2	RFX3	ZNF217		MEF2C	NR3C1	RFX2	RFX2	NR4A2	NFATC1			SMAD3	NR4A2	NR1D1	MEF2D	KLF16	KLF5		KLF6	KLF6	ID3			SOX13				SP1		MYC
RUNX2	NR3C1	ZHX3	SOX2	TCF12	SOX13	SOX12			PRDM8		NFATC3	ZNF80	ZBTB43	TCF7	TSC22D3	ZNF331	ZNF267	PRDM8	NR1D1	RORA	ZNF580		MEF2D	NR4A1	RREB1	RREB1	PAX5	NFATC3			SP140L	RARA	NR4A2	MNT	KLF4	KLF6		MAF	MAF	IRF2			SOX2				SREBF1		NFE2L1
SMAD3	PBX1	ZNF334	SOX8	TCF4	SOX2	SOX2			RARA		NFE2		ZFP64	TGIF1	ZBTB1		ZNF331	RARA	NR4A1	RREB1			MEIS1	PBX1	RXRA	RUNX1	PRDM2	NFKB2			SREBF1	RARG	PBX2	NFX1	KLF5	KLF9		MAFF	MAX	JUN			SOX21				TBX2		NFIA
SNAI2	PPARG	ZNF532	ST18	TFEB	SOX8	SOX8			REL		NFKB2		ZHX2	TSC22D3	ZBTB7B		ZSCAN16	REL	NR4A2	RUNX3			MEIS2	RARA	SIX2	RXRA	PRDM4	NFX1			STAT4	RFX1	RARA	NR4A1	KLF6	MEF2D		MAX	MEF2D	KLF12			SOX5				TCF7L2		NFIB
TBX3	RARA	ZNF536	TCF12	THRA	SREBF1	SREBF2			RFX1		NFX1		ZNF184	XBP1	ZHX2			RERE	NR4A3	SMAD3			MLXIP	RERE	SIX5	SMAD3	RARA	NR4A2			STAT5B	RFX3	RFX1	NR4A2	KLF9	MESP2		MEF2D	MNT	KLF2			SP8				TEAD1		NFIX
TEAD1	RERE		TCF4	TSC22D3	ST18	ST18			RFX2		NR1D1		ZNF217	ZBTB25	ZNF217			RFX1	PBX2	SREBF1			MNT	RFX3	SREBF1	SP3	RFX1	PAX5			TBX21	RORA	RFX3	PPARA	MAFF	MNT		MEIS1	MXD1	KLF4			TCF4				TFAP2C		NPAS2
TGIF1	RFX2		TEF	VEZF1	TCF4	TCF12			RFX3		NR4A2		ZNF580	ZEB2				RFX3	PBX4	STAT5B			NFIA	RREB1	TEAD1	SPI1	RFX3	PBX2			TCF7	RUNX3	RORA	RERE	MEF2A	NR3C2		MNT	NFATC3	KLF6			TCF7L2				TFAP4		NR2C1
TSC22D2	RREB1		TFEB	ZBTB16	TEF	TCF4			RREB1		PBX2			ZHX2				RORA	PLAGL2	TCF7			NFIB	RUNX1	TEAD3	STAT1	RFX5	POU2F2			TGIF1	SATB1	RUNX3	RFX2	MEF2D	NR4A1		MXD1	NFATC4	KLF7			TEAD3				TGIF1		NR3C1
ZBTB17	RUNX1		TSC22D3	ZBTB17	TFEB	TEF			RUNX1		PRDM1			ZNF184				RREB1	POU2F2	TGIF1			NFIC	RXRA	TEF	TGIF1	SMAD3	PRDM2			TRERF1	SMAD3	SATB1	RFX3	MLXIP	NR4A2		NFATC3	NFYA	LYL1			TGIF1				TSC22D1		NR4A2
ZFHX3	RXRA		TSC22D4	ZBTB20	THRA	TFEB			RUNX2		PRDM8			ZNF217				RUNX3	PRDM1	TSC22D3			NFIX	SIX1	TGIF1	TP63	SP110	PRDM4			TSC22D3	STAT4	SMAD3	RREB1	MNT	NR5A2		NFATC4	NR1H4	MAF			TOX3				ZBTB20		PLAGL2
ZFHX4	SMAD3		ZBTB16	ZBTB7A	TSC22D3	THRA			SMAD3		RARA							SATB1	PRDM8	XBP1			NKX2-3	SMAD3	THRA	TRERF1	SP140L	RARA			ZBTB1	TBX21	SREBF1	RXRA	NFIA	OVOL1		NFYA	NR1I2	MEF2C			TRERF1				ZBTB7B		PPARD
ZFPM1	SOX5		ZBTB17	ZBTB7B	TSC22D4	TSC22D1			SPI1		RARG							SMAD3	RARA	ZBTB1			NR2F2	SREBF1	TSC22D3	UBP1	SPIB	REL			ZBTB7A	TCF7	STAT1	SATB2	NFIC	OVOL2		NR1I2	NR5A2	MEF2D			TSC22D1				ZBTB7C		RFX2
ZHX3	SP1		ZBTB20	ZEB2	ZBTB16	TSC22D3			STAT3		REL							SP140L	RARG	ZBTB38			NR4A1	TEAD1	TSHZ1	ZBTB7A	TFEB	RELA			ZBTB7B	TFEB	STAT4	SMAD3	NFIX	PPARA		NR4A2	PBX1	MEOX2			TSHZ3				ZFHX3		RREB1
ZIC1	SP3		ZBTB47	ZHX2	ZBTB17	TUB			STAT5A		RFX1							SREBF2	RBPJ	ZEB2			NR4A2	TEAD4	TWIST2	ZEB2	TGIF1	RERE			ZHX2	TGIF1	STAT5B	SREBF1	NFX1	RARA		NR5A2	PBX2	MNT			ZBTB7B				ZNF143		RUNX1
ZNF217	SREBF1		ZBTB7A	ZKSCAN1	ZBTB47	VEZF1			TAL1		RFX3							STAT1	REL	ZHX2			PBX1	TFEB	ZBTB16	ZFP91-CNTF	TSC22D3	RFX1			ZNF217	TSC22D3	TBX21	SREBF2	NR1D1	RREB1		ONECUT2	PLAGL2	MSC			ZFHX2				ZNF217		SMAD3
ZNF516	STAT3		ZBTB7B	ZNF334	ZBTB7A	ZBTB16			TGIF1		RORA							STAT5B	RFX3	ZKSCAN3			RARA	TGIF1	ZBTB7B	ZNF217	ZBTB1	RFX3			ZNF80	USF1	TCF7	TCF7L2	NR2F6	RUNX1		PBX1	PRDM1	MYC			ZFP64				ZNF335		SOX9
	STAT5B		ZEB2	ZNF532	ZBTB7B	ZBTB17			TRPS1		RREB1							TCF7	RORA	ZNF184			RERE	TP63	ZFHX3	ZNF267	ZHX2	RREB1				ZBTB1	TGIF1	TEF	NR3C2	RXRA		PLAGL2	RARA	MYF6			ZIC3				ZNF41		SREBF1
	TBX15		ZFHX3	ZNF536	ZEB2	ZBTB20			USF1		RUNX3							TGIF1	RORC	ZNF217			RFX2	TSC22D3	ZKSCAN3	ZNF516	ZNF217	SMAD3				ZBTB16	TRERF1	TGIF1	NR4A1	SATB2		PRDM1	RERE	MYOD1			ZIC5						STAT4
	TCF4		ZHX2	ZZZ3	ZFHX3	ZBTB47			XBP1		SMAD3							TRERF1	RUNX1	ZNF311			RREB1	ZBTB16		ZNF710	ZNF460	SP110				ZBTB7A	TSC22D3	THRA	NR4A2	SOX4		RARA	RREB1	MYOG			ZNF202						TBX3
	TCF7L2		ZNF334		ZHX2	ZBTB7A			YY1		SREBF1							USF1	RUNX2	ZNF394			SMAD3	ZBTB7B			ZNF532	SP140L				ZEB2	USF1	VDR	OVOL1	SREBF1		RERE	RUNX1	NFATC1			ZNF217						TEAD1
	TGIF1		ZNF532		ZIC4	ZBTB7B			ZBTB16		STAT1							XBP1	RUNX3	ZNF692			SP1	ZEB2			ZNF621	SP3				ZHX2	ZBTB1	WHSC1	OVOL2	SREBF2		RREB1	RXRA	NFATC2			ZNF281						TFCP2L1
	TSC22D2		ZNF536		ZIC5	ZEB2			ZEB2		STAT5A							YY1	SMAD3				TCF7L2	ZFHX3				SPI1				ZNF184	ZBTB2	XBP1	PPARA	TBX10		RUNX1	SMAD3	NFATC3			ZNF292						TGIF1
	TWIST1				ZNF334	ZHX2			ZKSCAN3		TCF7							ZBTB17	SREBF2				TEAD1	ZFHX4				SPIB				ZNF217	ZBTB7A	ZBTB7A	RARA	TEAD1		RXRA	SOX13	NFATC4			ZNF398						TP63
	TWIST2				ZNF536	ZHX3			ZNF184		TGIF1							ZBTB25	STAT1				TGIF1	ZNF366				SREBF2				ZNF80	ZEB2	ZBTB7B	RCOR1	TEF		SMAD3	SP1	NFE2L1			ZNF423						TRPS1
	ZBTB16				ZNF710	ZNF334			ZNF217		TSC22D3							ZBTB7B	STAT3				THRA	ZNF423				TCF4					ZHX2	ZBTB7C	RFX2	TFEB		SOX4	SREBF1	NFE2L2			ZNF532						TSC22D1
	ZBTB7A				ZZZ3	ZNF532			ZNF267		UBTF							ZNF184	STAT5B				TSC22D2					TFEB					ZNF184	ZNF217	RREB1	TGIF1		SP1	STAT3	NFIA			ZNF649						TSC22D2
	ZBTB7B					ZNF536			ZNF394		USF1							ZNF217	TBX21				TSHZ1					TGIF1					ZNF217	ZNF710	RUNX1	TSC22D2		SREBF1	STAT5A	NFIB			ZNF664						TSC22D3
	ZEB2								ZNF445		XBP1							ZNF267	TCF7				VEZF1					TSC22D3					ZNF335		RXRA	TSHZ1		STAT3	TCF7L2	NFIC			ZSCAN10						ZBTB17
	ZNF217								ZNF521		YY1							ZNF410	TGIF1				XBP1					USF1					ZNF460		SATB2	YY1		STAT5A	TEAD1	NFIX									ZNF460
	ZNF22										ZBTB25							ZNF80	TSC22D2				ZBTB16					YY1					ZNF580		SMAD3	ZBTB1		TCF7L2	TFEB	NFYA
	ZNF436										ZBTB38							ZSCAN16	UBTF				ZBTB7A					ZBTB1					ZNF80		SOX13	ZBTB7A		TEAD1	TFEC	NR1D1
	ZNF664										ZBTB7B								XBP1				ZBTB7B					ZBTB16					ZSCAN10		SOX4	ZBTB7B		TFEB	TGIF1	NR2F2
											ZEB2								ZBED4				ZEB2					ZEB2							SREBF1	ZBTB7C		TGIF1	THRA	NR3C1
											ZFP64								ZBTB1				ZFHX3					ZHX2							SREBF2	ZNF276		THRA	THRB	NR4A1
											ZNF175								ZBTB17				ZNF217					ZNF184							TEF			THRB	TSC22D1	NR4A2
											ZNF184								ZBTB32									ZNF217							TFEB			TSC22D1	TSC22D2	PAX7
											ZNF217								ZBTB7A									ZNF532							TGIF1			TSC22D2	TSHZ1	PBX2
											ZNF311								ZBTB7B									ZNF621							THRA			TSHZ1	XBP1	PRRX1
																			ZFP1									ZNF652							TSC22D2			XBP1	YY1	RARA
																			ZHX2																TSHZ1			YY1	ZBTB38	RARB
																			ZNF217																VDR			ZBTB38	ZBTB4	RARG
																			ZNF267																ZBED4			ZBTB4	ZBTB7A	RBPJ
																			ZNF292																ZBTB25			ZBTB7A	ZBTB7B	RERE
																			ZNF335																ZBTB7A			ZBTB7B	ZFP91-CNTF	RFX2
																			ZNF410																ZBTB7B			ZFPM1	ZFPM1	RFX3
																			ZNF576																ZBTB7C			ZNF160	ZNF160	RREB1
																																			ZFPM1			ZNF217	ZNF219	RXRA
																																			ZNF219			ZNF219	ZNF415	SIX1
																																			ZNF276			ZNF33B	ZNF516	SMAD1
																																			ZNF281			ZNF415	ZNF710	SMAD3
																																			ZNF519			ZNF710	ZNF91	SNAI2
																																			ZNF710					SOX11
																																								SOX12
																																								SOX4
																																								SP2
																																								SP3
																																								SRF
																																								STAT5A
																																								TBX15
																																								TBX18
																																								TCF4
																																								TCF7L2
																																								TEAD1
																																								TEAD2
																																								TEAD3
																																								TFAP4
																																								TGIF1
																																								THRA
																																								TRPS1
																																								TSC22D2
																																								TSHZ1
																																								UBTF
																																								ZBTB10
																																								ZBTB7B
																																								ZEB2
																																								ZFHX4
																																								ZFP91-CNTF
																																								ZNF184
																																								ZNF213
																																								ZNF217
																																								ZNF264
																																								ZNF366
																																								ZNF423
																																								ZNF436
																																								ZNF516
																																								ZNF521
																																								ZNF532
[truncated: 34 more columns]

## Sheet: autoreg_TF
Astrocytes	BI_Adipose_Nuclei	BI_Brain_Angular_Gyrus	BI_Brain_Anterior_Caudate	BI_Brain_Cingulate_Gyrus	BI_Brain_Hippocampus_Middle	BI_Brain_Inferior_Temporal_Lobe	BI_Brain_Mid_Frontal_Lobe	BI_CD34_Primary_RO01480	BI_CD34_Primary_RO01536	BI_CD34_Primary_RO01549	BI_CD4_Memory_Primary_7pool	BI_CD4_Memory_Primary_8pool	BI_CD4_Naive_Primary_7pool	BI_CD4_Naive_Primary_8pool	BI_CD4p_CD225int_CD127p_Tmem	BI_CD4p_CD25-_CD45RAp_Naive	BI_CD4p_CD25-_CD45ROp_Memory	BI_CD4p_CD25-_Il17-_PMAstim_Th	BI_CD4p_CD25-_Il17p_PMAstim_Th17	BI_CD8_Memory_7pool	BI_CD8_Naive_7pool	BI_CD8_Naive_8pool	BI_Duodenum_Smooth_Muscle	BI_Skeletal_Muscle	BI_Stomach_Smooth_Muscle	CD14	CD19_primary	CD20	CD34_adult	CD34_fetal	CD3	CD56	CD8_primary	Colon_Crypt_1	Colon_Crypt_2	Colon_Crypt_3	DND41	Fetal_Intestine	Fetal_Intestine_Large	Fetal_muscle	Fetal_Thymus	GM12878	H1	H2171	HCC1954	HCT-116	HeLa	HepG2	HMEC
ARID5B	ARID5B	ARID5B	ARID5B	ARID5B	ATF1	ARID5B	BHLHE40	E2F3	BHLHE40	ELF1	ARID5B	ARID5B	BACH2	BCL6	BHLHE40	BACH2	BHLHE40	ARID5B	ARID5B	BCL6	BACH2	BACH2	AHR	ARID5B	BARX1	BACH1	ARID5B	ARID5B	GATA5	GATA5	BACH2	BCL6	BACH2	ATF3	BHLHE40	ATF3	BCL6	ARID5B	ARID5B	ARID5B	BACH2	ARID5B	CREB3L2	ELF3	EHF	BHLHE40	ATF1	CREB3L2	ARID5B
BCL6	BCL6	BHLHE41	BCL6	ATF1	BCL6	ATF1	ERF	ELF1	E2F3	ERG	BCL6	BCL6	BCL6	BHLHE40	CREB1	CREB1	ELF1	BACH2	ARNTL	BHLHE40	BCL6	BCL6	ARID5B	BCL6	BCL6	BCL6	BACH2	BACH2	GFI1B	GFI1B	BCL6	BHLHE40	BCL6	BHLHE40	CDX1	BHLHE40	ELF1	BCL6	BCL6	ATF4	E2F2	ELF1	FOXD3	ERF	ELF3	ELF3	BHLHE40	EHF	BCL6
BHLHE40	BHLHE40	KLF13	BHLHE41	BHLHE41	BHLHE41	BCL6	JUNB	ERG	ELF1	ETS2	BHLHE40	ERF	ERF	ETS1	ELF1	ELF1	ELK3	BCL6	BACH2	ERF	ETS1	ERF	BCL6	BHLHE40	BHLHE40	BHLHE40	BHLHE40	CREB1	HOXB2	JUNB	BHLHE40	ELF1	BHLHE40	CDX1	CDX2	CDX1	ETS1	BHLHE40	BHLHE40	BCL6	ELF1	ETV6	FOXO1	FOSL2	FOXA1	GLIS2	EHF	ELF1	BHLHE40
CREB3L1	BHLHE41	MAX	CREB5	CREB5	CREB3L2	BHLHE41	KLF13	ETS2	ELK3	ETV6	CREB1	ETS1	ETS1	FOSL2	ETS1	ETS1	ETS1	CREM	BCL6	ETS1	FOXJ2	ETS1	BHLHE40	BHLHE41	ELK3	CEBPA	CREB1	EBF1	JUNB	KLF13	CREB1	EOMES	CREB1	CDX2	CEBPA	CDX2	ETS2	BHLHE41	BHLHE41	BHLHE40	ETS1	HIVEP2	GLI2	FOXJ2	FOXI1	HOXB8	ELF3	FOXA1	CEBPG
CREB3L2	CEBPB	MEF2C	DBP	FOXO3	CREB5	CREB5	MEF2C	ETV6	ERG	FOXP1	ELF1	FOXJ2	FOXJ2	FOXJ2	FOXJ2	FOXJ2	FOXJ2	EGR2	BHLHE40	FOSL2	HIVEP2	FOXJ2	CDX1	ETS1	ETV6	CEBPD	EGR3	EGR3	KLF13	NFE2	ELF1	ETS1	EGR1	CEBPA	CEBPG	CEBPA	ETV6	CDX1	CDX1	CREB3L1	ETV6	IKZF2	MYB	INSM1	GATA3	JUNB	ETS2	FOXQ1	CREB1
ELK3	CREB1	MEF2D	ETV6	HMBOX1	ERF	EGR1	MEF2D	FOXP1	ETS2	HOXA9	ERF	GATA3	FOXO3	GATA3	GATA3	FOXP1	HIVEP2	ELF1	CREB1	HBP1	IKZF1	HBP1	CDX2	ETV6	FOSL2	E2F2	ELF1	ELF1	KLF16	RREB1	ETS1	FLI1	ELF1	CREB3L1	CREB3L1	CEBPG	FLI1	CDX2	CDX2	CREB3L2	GFI1	IRF5	NANOG	KLF13	GLIS3	MYC	FOSL2	GATA4	DLX2
ETS1	CREB3L2	NFIA	FOXK1	IRF2	FOXO3	ETV5	NFIX	IKZF1	ETV6	IKZF1	ETS1	HBP1	FOXP1	HBP1	HBP1	HIVEP2	IKZF1	ELK3	EGR1	HIVEP2	IRF1	HIVEP2	CREB3	FOS	FOXF2	E2F3	ERF	ETS1	RREB1	STAT5A	FLI1	FOSL2	ERF	E2F2	ELF3	ELF3	GATA3	CEBPA	CEBPA	CREB5	IKZF1	KLF13	NR2F6	MEF2D	HES1	NR2F1	HES1	MNT	ELK3
FOSL2	EBF1	NFIX	FOXO3	JUNB	HMBOX1	ETV6	NR2F1	JUNB	FLI1	JUNB	FOXJ2	HIVEP2	GATA3	HIVEP2	HIVEP2	IKZF1	JUN	ETS1	EGR2	HOXB2	JUN	IKZF1	CREB3L2	FOSL2	HLF	ELF1	ETS1	FLI1	SREBF1	TAL1	HIVEP2	FOXJ2	ETS1	EHF	ELF4	ERF	GFI1	CEBPG	CEBPG	EBF1	IRF1	MEF2D	NR5A1	NFIA	HIF1A	ONECUT3	HIF1A	NANOG	ETS1
FOXL1	ELK3	NR2F1	HMBOX1	KLF13	IRF1	FOXO3	NR4A1	MEF2C	FOXK1	MEF2C	FOXO3	IKZF1	HBP1	IKZF1	IKZF1	IRF1	JUNB	FLI1	ELK3	IKZF1	JUNB	IRF1	ELF1	FOXK1	HOXA3	ELK3	FLI1	FOS	STAT5A		IKZF1	FOXO3	FLI1	ELF3	ETS1	ETS2	IKZF1	CREB3L1	CREB3L1	ELK3	KLF13	MSC	PBX1	NFIX	IKZF2	RARA	HOXC10	NR5A1	ETS2
FOXP1	ERF	POU3F3	IRF1	KLF16	IRF2	IRF2	POU3F3	MEF2D	FOXP1	MEF2D	GATA1	IRF1	HIVEP2	IRF1	IRF1	JUN	JUND	FOSL2	ETS1	IRF1	KLF12	JUN	ELF3	FOXO3	HOXB2	ETV6	FOXO1	HIF1A	TAL1		IRF1	HBP1	FOSL2	ERF	ETS2	FOS	IKZF2	CREB3L2	CREB3L2	ERG	KLF7	NR3C1	POU5F1	NHLH1	KLF5	RARG	JUNB	RFX3	FOS
GLI2	ERG	RARA	IRF2	MAX	JUNB	JUNB	SOX10	MEIS1	GATA2	MEIS1	GATA3	JUN	IKZF1	JUN	JUN	JUNB	KLF13	FOXJ2	FOSL2	JUN	KLF13	JUNB	ELK3	HIC1	HOXB3	FLI1	GCM1	HIVEP2	ZBTB7B		JUN	HIVEP2	FOXJ2	ETS2	FOS	FOSL2	IRF1	ELF1	ELF1	ETS1	LEF1	PAX5	RARB	OLIG2	MYC	SMAD3	KLF5	RREB1	FOSL2
GLIS1	ESR1	SOX2	JDP2	MEF2D	KLF13	KLF13	SOX2	NFE2	HBP1	NFE2	HBP1	JUNB	JUN	JUNB	JUNB	JUND	MEF2D	FOXO1	FOXJ2	JUNB	KLF3	KLF13	ERF	HIVEP2	ISL1	FOS	HIVEP2	HMBOX1	ZNF217		JUNB	IKZF1	HBP1	FOS	FOSL2	FOXA1	IRX3	ELF3	ELF3	ETV6	MEF2D	RORA	RARG	RFX2	PBX1	SOX12	MAFK	TBX2	GLI3
GLIS3	ETS1	SOX8	JUNB	MEIS2	KLF15	MAX	SOX8	NFYA	HOXA7	NFE2L2	HIVEP2	KLF12	JUNB	KLF12	KLF12	KLF13	MNT	GFI1	FOXO1	JUND	KLF7	KLF3	ETS1	HOXC4	ISL2	FOSL2	HMBOX1	IKZF1			KLF12	IKZF2	HIVEP2	FOSL2	FOXA1	FOXD2	KLF12	FOS	ETS2	FLI1	NR3C1	RREB1	RORA	RXRA	POU1F1	SP1	MEF2D	XBP1	HES1
HES1	FLI1	SREBF1	KLF13	MITF	MAX	MEF2D	TCF4	RARA	IKZF1	RARA	HOXB2	KLF13	KLF13	KLF13	KLF13	LEF1	NFATC2	HBP1	FOXP1	KLF13	LEF1	LEF1	ETS2	JUN	JUN	FOXK1	IKZF1	IRF2			KLF13	IRF1	HMBOX1	FOXA1	FOXD2	FOXK1	LEF1	FOSL2	FOS	FOS	RFX3	RUNX3	SALL2	SP3	RARA	SREBF1	MYC	YY1	HOXA5
HIC1	FOSL2	TCF12	MAX	NFIA	MEF2D	MEIS2	TEF	REL	IRF1	REL	IKZF1	NFKB2	KLF3	KLF3	MEF2D	MEF2D	NFKB2	HIVEP2	HBP1	MEF2D	MEF2D	MEF2D	ETV6	JUNB	JUNB	FOXO3	IRF1	IRF5			KLF3	IRF2	IKZF1	FOXD2	FOXO3	FOXO1	MYB	FOXA1	FOSL2	FOSL2	RREB1	SMAD3	SOX1	SPDEF	RUNX1	TCF7L2	NFYA		IRX2
HIVEP2	FOXO1	TCF4	MEF2D	NFIB	MNT	MITF	TFEB	RFX2	JUNB	RFX2	IRF1	NR4A2	LEF1	MEF2D	NFATC1	MNT	NR4A2	IKZF1	HIVEP2	MZF1	MZF1	MNT	FOS	KLF13	KLF7	IKZF1	IRF2	IRF8			MEF2D	JUN	IRF1	FOXP1	FOXP1	FOXO3	NR2C2	FOXO3	FOXA1	FOXJ2	SATB1	TFEB	SOX11	SREBF1	RUNX2	TEAD3	NR4A1		IRX4
HOXA2	FOXO3	TEF	MEIS2	NFIX	NFIA	MNT	ZBTB16	RFX3	JUND	RFX3	JUN	PRDM1	MEF2D	NFATC2	NFATC2	NFKB2	RARA	IRF4	IKZF1	NFATC2	NFKB2	NFKB2	FOSL2	MAF	MEF2D	IRF1	IRF5	JUN			NFATC1	JUNB	JUN	GATA6	FOXP2	FOXP1	SOX4	FOXP1	FOXO3	FOXO3	SOX4	ZNF217	SOX13	STAT5B	RXRA	TGIF1	NR4A2		IRX5
HOXB2	HBP1	TFEB	NFIA	NKX2-2	NFIX	NFIA	ZBTB7A	RREB1	KLF7	RUNX1	JUNB	RARA	MZF1	NFKB2	NFE2L2	NR4A2	REL	IRF8	JUN	NFE2	NR4A2	NR4A2	FOXO3	MAFA	MEIS1	IRF2	IRF8	JUNB			NFATC2	KLF13	JUNB	HES1	GATA6	GATA6	STAT1	GATA4	FOXP1	GABPA	STAT5A		SOX2	TCF4	SMAD3	ZBTB7B	PBX1		JUN
KLF12	HIF1A	THRA	NFIX	NR4A1	NKX2-2	NFIB	ZBTB7B	RUNX1	MEF2C	STAT5A	JUND	RFX3	NFE2L2	NR4A2	NFKB1	RARA	RFX1	JUNB	JUNB	NFKB2	RARA	RARA	GATA6	MAFK	MEIS2	IRF5	JUN	KLF13			NFKB1	MEF2D	KLF13	HIC1	HES1	HES1	WT1	GATA5	GATA5	HBP1	TCF7		SOX21	THRA	SOX9		PITX1		JUNB
KLF7	HOXA4	ZBTB16	NR4A1	POU3F3	NKX6-2	NFIX		RUNX2	MEF2D	TAL1	KLF12	RORA	NFKB2	PRDM1	NFKB2	REL	RFX3	KLF12	KLF12	NR3C1	RFX3	RFX3	HIC1	MEF2C	MNT	IRF8	JUNB	KLF6			NFKB2	MNT	LEF1	HNF1B	HIC1	HNF1B	XBP1	GATA6	GATA6	HIC1	XBP1		SOX5	UNCX	SP3		RARA		KLF13
MAFF	HOXB4	ZBTB7A	POU3F2	PROX1	NR2F1	NR4A1		RUNX3	MEIS1	XBP1	KLF13	RUNX3	NR4A2	RARA	NR4A2	RFX1	RORA	KLF13	KLF13	NR4A2	RUNX3	RUNX3	HIF1A	MEF2D	NFIX	JUNB	KLF13	KLF7			NR4A2	MZF1	MEF2D	HOXA10	HNF1B	HOXA9	ZNF217	HBP1	HBP1	HIVEP2	ZNF217		SP8	ZBTB7B	SREBF1		RREB1		KLF4
MAFK	HOXC9	ZBTB7B	POU3F3	RXRA	NR2F2	PBX1		STAT5A	MYB	ZNF217	KLF16	STAT5B	RARA	REL	RARA	RFX3	RUNX3	LEF1	MAF	RARA	SATB1	SATB1	HOXA3	MNT	NFKB2	KLF13	MEF2C	MEF2C			RARA	NFATC2	MNT	HOXA13	IRF1	IRF2		HES1	HES1	HOXA10			TCF7L2		STAT4		RXRA		KLF5
MEF2D	IRF1		RARA	SOX10	NR4A1	POU3F2		TGIF1	NFATC2		MEF2D	TCF7	RFX3	RFX3	RARG	SATB1	SMAD3	MEF2D	MEF2D	REL	TCF7	TCF7	HOXA4	MYF6	NR2F2	KLF4	MEF2D	MEF2D			RARG	NFKB2	MZF1	IRF1	IRF2	IRF7		HIC1	HIC1	HOXD8			TEAD3		TFAP2A		SMAD3		KLF7
MEIS1	KLF11		SOX10	SOX12	POU3F2	POU3F3		ZNF217	NFE2		MZF1	TGIF1	SATB1	RORA	REL	SREBF1	STAT1	MYC	MNT	RFX3	TGIF1	TGIF1	IRF1	MYOD1	NR4A1	MAFB	NFATC1	MNT			RFX3	NFYA	NFATC2	JUN	JUN	JUN		HNF4G	HNF1B	IRF2			TGIF1		TFAP2C		SOX13		MAFF
NFIX	KLF13		SOX12	SOX2	POU3F3	PROX1			NFYA		NFATC2	ZNF217	STAT5B	RUNX3	RFX3	STAT1	STAT4	NFATC1	NFATC1	RORA	ZNF217	ZNF217	IRF2	NFE2L1	NR4A2	MAX	NFE2L2	MZF1			RORA	NR3C1	NFE2L2	JUNB	KLF12	JUNB		HOXA3	HNF4G	JUN			ZBTB7B		TGIF1		SOX7		MNT
NR2F1	KLF7		SOX13	SOX8	PROX1	RARA			NR3C1		NFE2		TCF7	RXRA	RORA	STAT5B	STAT5B	NFKB1	NFATC2	RREB1			JUNB	NFIA	PBX1	MEF2D	NFKB2	NFATC1			RUNX3	NR4A2	NFKB2	JUND	KLF13	KLF13		HOXB2	HOXB2	KLF12			ZIC3		TP63		SP1		MYC
NR2F2	MEF2D		SOX2	TCF12	RARA	RXRA			RARA		NFKB2		TGIF1	STAT4	RUNX3	TCF7	TCF7	NR3C1	NFE2L2	RUNX3			KLF13	NFIB	RARA	MNT	NR4A2	NFKB2			SMAD3	RARA	NFYA	KLF13	KLF16	KLF16		IRF1	IRF1	KLF4			ZNF217		XBP1		SREBF1		NFIA
PRRX1	MNT		SOX8	TCF4	RXRA	SOX10			REL		NR4A2		ZNF217	STAT5B	SMAD3	USF1	TGIF1	NR4A2	NFKB2	SMAD3			KLF5	NFIX	RFX2	RARA	PAX5	NR4A2			SREBF1	RARG	NR4A2	KLF16	KLF4	KLF4		IRF2	IRF2	KLF7			ZNF423		ZNF217		TBX2		NFIB
RFX3	NFE2L1		TCF12	TFEB	SOX10	SOX12			RFX1		PRDM1			TCF7	STAT4	YY1	ZBTB7B	POU2F2	NR4A1	SREBF1			KLF7	NR2F2	RREB1	RFX2	PRDM4	PAX5			STAT4	RFX1	RARA	KLF4	KLF5	KLF5		JUN	JUN	MAF							TCF7L2		NFIX
RUNX1	NFIA		TCF4	THRA	SOX12	SOX2			RFX2		RARA			TGIF1	STAT5B	ZBTB7B	ZNF217	PRDM1	NR4A2	STAT5B			MEF2C	NR3C1	RXRA	RREB1	RARA	POU2F2			STAT5B	RFX3	RFX1	KLF5	MAFF	MEF2D		KLF13	KLF13	MEF2C							TEAD1		NR3C1
RUNX2	NFIB		TEF	ZBTB16	SOX13	SOX8			RFX3		RARG			ZNF217	TCF7	ZNF217	ZSCAN16	RARA	POU2F2	TCF7			MEF2D	NR4A1	SREBF1	RUNX1	RFX1	PRDM4			TBX21	RORA	RFX3	MEF2D	MEF2A	NR4A1		KLF5	KLF5	MEF2D							TFAP2C		NR4A2
SMAD3	NFIL3		TFEB	ZBTB7A	SOX2	SREBF2			RREB1		REL				TGIF1			REL	PRDM1	TGIF1			MEIS1	PBX1	TEAD1	RXRA	RFX3	RARA			TCF7	RUNX3	RORA	NR4A1	MEF2D	NR4A2		MAF	MAF	MEOX2							TFAP4		RFX2
SNAI2	NR2F2		ZBTB16	ZBTB7B	SOX8	TCF12			RUNX1		RFX1				ZBTB7B			RFX1	RARA	ZNF217			MEIS2	RARA	TEAD3	SMAD3	RFX5	REL			TGIF1	SATB1	RUNX3	NR4A2	NFIX	NR5A2		MAFF	MAX	MNT							TGIF1		RREB1
TEAD1	NR3C1		ZBTB7A		SREBF1	TCF4			RUNX2		RFX3				ZNF217			RFX3	RARG				MNT	RFX3	TEF	SP3	SMAD3	RELA			ZBTB7A	SMAD3	SATB1	PPARA	NR2F6	PPARA		MAX	MEF2D	MSC							ZBTB7B		RUNX1
TGIF1	PBX1		ZBTB7B		TCF4	TEF			SMAD3		RORA							RORA	REL				NFIA	RREB1	TGIF1	SPI1	SPIB	RFX1			ZBTB7B	STAT4	SMAD3	RFX2	NR4A1	RARA		MEF2D	MNT	MYC							ZBTB7C		SMAD3
ZIC1	PPARG				TEF	TFEB			SPI1		RREB1							RREB1	RFX3				NFIB	RUNX1	ZBTB16	STAT1	TFEB	RFX3			ZNF217	TBX21	SREBF1	RFX3	NR4A2	RREB1		MEIS1	NFATC4	MYF6							ZNF143		SOX9
ZNF217	RARA				TFEB	THRA			STAT3		RUNX3							RUNX3	RORA				NFIX	RXRA	ZBTB7B	TGIF1	TGIF1	RREB1				TCF7	STAT1	RREB1	PPARA	RUNX1		NFATC4	NFYA	MYOD1							ZNF217		SREBF1
	RFX2				THRA	ZBTB16			STAT5A		SMAD3							SATB1	RUNX1				NKX2-3	SMAD3	ZKSCAN3	TP63	ZNF217	SMAD3				TFEB	STAT4	RXRA	RARA	RXRA		NFYA	NR1H4	MYOG									STAT4
	RREB1				ZBTB16	ZBTB7A			TAL1		SREBF1							SMAD3	RUNX2				NR2F2	SREBF1		ZBTB7A		SP3				TGIF1	STAT5B	SMAD3	RFX2	SOX4		NR1I2	NR1I2	NFATC1									TEAD1
	RUNX1				ZBTB7A	ZBTB7B			TGIF1		STAT1							SREBF2	RUNX3				NR4A1	TEAD1		ZNF217		SPI1				ZBTB16	TBX21	SREBF1	RREB1	SREBF1		NR4A2	NR5A2	NFATC2									TFCP2L1
	RXRA				ZBTB7B				USF1		STAT5A							STAT1	SMAD3				NR4A2	TEAD4				SPIB				ZBTB7A	TCF7	SREBF2	RUNX1	SREBF2		NR5A2	PBX1	NFATC4									TGIF1
	SMAD3				ZIC4				XBP1		TCF7							STAT5B	SREBF2				PBX1	TFEB				SREBF2				ZNF217	TGIF1	TCF7L2	RXRA	TEAD1		PBX1	PRDM1	NFE2L1									TP63
	SOX5								YY1		TGIF1							TCF7	STAT1				RARA	TGIF1				TCF4					USF1	TEF	SMAD3	TGIF1		PRDM1	RARA	NFE2L2
	SP1								ZBTB16		USF1							TGIF1	STAT3				RFX2	TP63				TFEB					ZBTB7A	TGIF1	SOX13	YY1		RARA	RREB1	NFIA
	SP3								ZKSCAN3		XBP1							USF1	STAT5B				RREB1	ZBTB16				TGIF1					ZNF217	VDR	SOX4	ZBTB7A		RREB1	RUNX1	NFIB
	SREBF1								ZNF217		YY1							YY1	TBX21				SMAD3	ZBTB7B				USF1						XBP1	SREBF1	ZBTB7B		RUNX1	RXRA	NFIX
	STAT3										ZBTB7B							ZBTB7B	TCF7				SP1	ZNF423				YY1						ZBTB7A	SREBF2	ZBTB7C		RXRA	SMAD3	NFYA
	STAT5B										ZNF217							ZNF217	TGIF1				TCF7L2					ZBTB16						ZBTB7B	TEF			SMAD3	SOX13	NR2F2
	TBX15																	ZNF410	ZBTB7A				TEAD1					ZNF217						ZBTB7C	TFEB			SOX4	SP1	NR3C1
	TCF4																	ZSCAN16	ZBTB7B				TGIF1											ZNF217	TGIF1			SP1	SREBF1	NR4A1
	TCF7L2																		ZNF217				THRA												VDR			SREBF1	STAT3	NR4A2
	TGIF1																						XBP1												ZBTB7A			STAT3	STAT5A	PAX7
	TWIST1																						ZBTB16												ZBTB7B			STAT5A	TCF7L2	PRRX1
	ZBTB16																						ZBTB7A												ZBTB7C			TCF7L2	TEAD1	RARA
	ZBTB7A																						ZBTB7B												ZNF219			TEAD1	TFEB	RARB
	ZBTB7B																						ZNF217															TFEB	TGIF1	RARG
	ZNF217																																					TGIF1	THRA	RFX2
																																						THRA	THRB	RFX3
																																						THRB	XBP1	RREB1
																																						XBP1	YY1	RXRA
																																						YY1	ZBTB7A	SMAD1
																																						ZBTB7A	ZBTB7B	SMAD3
																																						ZBTB7B	ZNF219	SNAI2
																																						ZNF217		SOX11
																																						ZNF219		SOX12
																																								SOX4
																																								SP2
																																								SP3
																																								SRF
																																								STAT5A
																																								TBX15
																																								TBX18
																																								TCF4
																																								TCF7L2
																																								TEAD1
																																								TEAD2
																																								TEAD3
																																								TFAP4
																																								TGIF1
																																								THRA
																																								ZBTB7B
																																								ZNF217
																																								ZNF423
[truncated: 34 more columns]

## Sheet: CRC_TF
Astrocytes	BI_Adipose_Nuclei	BI_Brain_Angular_Gyrus	BI_Brain_Anterior_Caudate	BI_Brain_Cingulate_Gyrus	BI_Brain_Hippocampus_Middle	BI_Brain_Inferior_Temporal_Lobe	BI_Brain_Mid_Frontal_Lobe	BI_CD34_Primary_RO01480	BI_CD34_Primary_RO01536	BI_CD34_Primary_RO01549	BI_CD4_Memory_Primary_7pool	BI_CD4_Memory_Primary_8pool	BI_CD4_Naive_Primary_7pool	BI_CD4_Naive_Primary_8pool	BI_CD4p_CD225int_CD127p_Tmem	BI_CD4p_CD25-_CD45RAp_Naive	BI_CD4p_CD25-_CD45ROp_Memory	BI_CD4p_CD25-_Il17-_PMAstim_Th	BI_CD4p_CD25-_Il17p_PMAstim_Th17	BI_CD8_Memory_7pool	BI_CD8_Naive_7pool	BI_CD8_Naive_8pool	BI_Duodenum_Smooth_Muscle	BI_Skeletal_Muscle	BI_Stomach_Smooth_Muscle	CD14	CD19_primary	CD20	CD34_adult	CD34_fetal	CD3	CD56	CD8_primary	Colon_Crypt_1	Colon_Crypt_2	Colon_Crypt_3	DND41	Fetal_Intestine	Fetal_Intestine_Large	Fetal_muscle	Fetal_Thymus	GM12878	H1	H2171	HCC1954	HCT-116	HeLa	HepG2	HMEC
ETS1	CREB3L2	MAX	DBP	IRF2	ATF1	BHLHE41	BHLHE40	E2F3	BHLHE40	ELF1	BHLHE40	ARID5B	ERF	ETS1	BHLHE40	CREB1	ELF1	CREM	ELK3	ERF	HIVEP2	ETS1	CREB3L2	BCL6	BCL6	BHLHE40	EGR3	CREB1	GFI1B	GATA5	BACH2	ELF1	ELF1	CDX2	CDX2	ELF3	ELF1	BHLHE40	CDX2	BCL6	BACH2	ELF1	FOXO1	ELF3	EHF	ELF3	ELF3	EHF	BHLHE40
FOXL1	EBF1	MEF2D	FOXK1	KLF13	ERF	ETV6	JUNB	ETV6	E2F3	ERG	ELF1	ETS1	ETS1	HIVEP2	CREB1	ELF1	ETS1	EGR2	ETS1	ETS1	IKZF1	IKZF1	ELF3	BHLHE40	ETV6	CEBPD	ELF1	EBF1	KLF13	GFI1B	ETS1	EOMES	ERF	ELF3	ELF3	FOXA1	ETS1	ELF1	ELF1	EBF1	ETS1	ETV6	MYB	INSM1	ELF3	GLIS2	FOSL2	ELF1	CEBPG
GLI2	ELK3	NFIA	IRF1	MAX	IRF1	FOXO3	KLF13	FOXP1	ELF1	ETV6	ETS1	IKZF1	FOXP1	IKZF1	ELF1	ETS1	HIVEP2	ELF1	FOXP1	HIVEP2	IRF1	JUNB	ERF	BHLHE41	HOXA3	E2F3	ERF	EGR3	KLF16	JUNB	FLI1	ETS1	ETS1	ETS2	ELF4	FOXO3	ETS2	FOXA1	ELF3	ELK3	ETV6	HIVEP2	NANOG	KLF13	FOXI1	MYC	KLF5	FOXQ1	DLX2
HIC1	ETS1	POU3F3	IRF2	MEF2D	IRF2	IRF2	MEF2D	IKZF1	ERG	FOXP1	HIVEP2	IRF1	HIVEP2	IRF1	ETS1	FOXP1	KLF13	ETS1	HIVEP2	IKZF1	JUNB	KLF13	ETS1	ETS1	ISL1	ELF1	ETS1	ELF1	TAL1	KLF13	HIVEP2	FLI1	FLI1	FOSL2	FOXD2	KLF13	ETV6	FOXO3	ETS2	ERG	GFI1	MSC	NR5A1	NFIA	HIF1A	NR2F1	MAFK	NANOG	ETS1
KLF7	FLI1	SOX2	JDP2	NFIX	KLF13	JUNB	NR4A1	JUNB	ETV6	IKZF1	HOXB2	KLF13	IKZF1	JUNB	FOXJ2	HIVEP2	RARA	FLI1	IKZF1	IRF1	KLF13	LEF1	ETV6	ETV6	MEF2D	ETV6	FLI1	ETS1		STAT5A	IKZF1	HIVEP2	HIVEP2	FOXA1	HIC1	KLF16	FLI1	GATA4	FOS	ETS1	IKZF1	RUNX3	POU5F1	NFIX	MYC	ONECUT3	MYC	RREB1	FOS
MAFK	FOXO1	SOX8	KLF13	NR4A1	MEF2D	KLF13	POU3F3	MEIS1	FLI1	MEF2C	IKZF1	NR4A2	KLF13	KLF13	IKZF1	IKZF1	RORA	FOXO1	JUN	KLF13	RARA	MNT	FOS	FOS	MEIS1	FLI1	FOXO1	FLI1		TAL1	IRF1	IKZF1	IKZF1	HNF1B	HNF1B	KLF4	GATA3	HOXA3	FOXA1	ETV6	IRF1	SMAD3	RARG	RXRA	RUNX1	RARA	NR4A1	TBX2	KLF4
RFX3	HBP1	SREBF1	MAX	POU3F3	NKX6-2	MAX	SOX10	RUNX1	GATA2	MEF2D	IRF1	RORA	LEF1	NFKB2	IRF1	IRF1	RUNX3	HIVEP2	KLF13	NR4A2	RUNX3	RARA	FOSL2	FOXK1	MEIS2	FOS	GCM1	HIF1A			KLF13	IRF1	IRF1	IRF1	IRF1	KLF5	GFI1	HOXB2	HIC1	FLI1	KLF13	TFEB	RORA	SP3	SMAD3	SMAD3	RARA	YY1	KLF5
RUNX1	IRF1	TCF4	NR4A1	SOX2	NR2F2	MEF2D	TEF	RUNX2	IKZF1	MEIS1	KLF13	RUNX3	NR4A2	RARA	KLF13	KLF13	SMAD3	KLF13	MAF	RARA	TGIF1	RUNX3	HIC1	FOXO3	NR2F2	FOXK1	HIVEP2	HIVEP2			NFATC1	JUNB	KLF13	JUNB	KLF12	RARA	IKZF2	IRF1	IRF1	HIC1	SATB1	ZNF217	SOX2	SPDEF	SP3	SP1	RREB1		KLF7
RUNX2	KLF11	TEF	POU3F3	TCF12	NR4A1	NR4A1		RUNX3	IRF1	RFX3	RORA		RARA	RORA	NFATC1	LEF1	STAT1	LEF1	NR4A1	RORA		TCF7	HIF1A	HIVEP2	NR4A1	IKZF1	IKZF1	IKZF1			RARG	KLF13	MEF2D	KLF13	KLF13	RREB1	IRF1	KLF13	KLF13	HOXA10	STAT5A		SOX21	SREBF1	STAT4	SREBF1	RXRA		MYC
SMAD3	MEF2D	ZBTB16	SOX10	TCF4	POU3F3	POU3F3		TGIF1	MEF2C	RUNX1	RREB1		SATB1	RUNX3	RARA	NR4A2	TCF7	NFKB1	POU2F2	RUNX3			IRF1	HOXC4	PBX1	IRF2	IRF1	IRF2			RORA	RARA	MZF1	KLF5	MAFF	RUNX1	IRX3	KLF5	KLF5	IRF2	TCF7		ZIC3	STAT5B	TFAP2A	TCF7L2	SMAD3		NR3C1
SNAI2	NFIA		SOX2	TFEB	RARA	RARA			MEF2D		SMAD3				RARG	SATB1	TGIF1	NR3C1	PRDM1	SREBF1			IRF2	JUN	RARA	IRF8	IRF8	IRF5			RUNX3	RARG	RARA	NR4A2	MEF2A	RXRA	KLF12	MAF	MAF	MYOD1					TP63	TEAD3	SOX13		RFX2
ZIC1	NR2F2		TCF12	ZBTB16	RXRA	SOX10			MEIS1		STAT1				RORA	SREBF1	ZBTB7B	NR4A2	RARA	TGIF1			JUNB	KLF13	RFX2	KLF13	JUNB	IRF8			SMAD3	RFX1	RFX1	RREB1	NR4A1	SREBF2	LEF1	MAX	MAX	NFYA					ZNF217		SREBF1		RUNX1
	NR3C1		TCF4	ZBTB7A	SOX13	SOX12			MYB		STAT5A				RUNX3	STAT1	ZNF217	RORA	RARG				KLF13	MYOD1	RREB1	KLF4	KLF13	KLF13			SREBF1	RORA	RORA	SMAD3	NR4A2	TEAD1	MYB	NFATC4	NFATC4	NR2F2							TBX2		SMAD3
	PBX1		TEF		SOX2	SOX2			RARA		TCF7				SMAD3	TCF7		SATB1	RORA				MEF2D	NR4A1	TEAD1	MEF2D	PAX5	KLF6			TCF7	RUNX3	RUNX3	TCF7L2	RARA	ZBTB7C	NR2C2	NR5A2	PBX1	RARA							TCF7L2		SOX9
	PPARG		TFEB		SOX8	SOX8			RREB1		TGIF1				TCF7	YY1		SMAD3	RUNX2				MEIS1	RARA	TEAD3	RARA	RARA	KLF7			TGIF1	SMAD3	SMAD3	TGIF1	RREB1		WT1	PBX1	RARA	RREB1							ZBTB7C		TEAD1
	RARA		ZBTB7A		SREBF1	TCF12			RUNX1		YY1				TGIF1			STAT1	RUNX3				MEIS2	RREB1	ZBTB16	RREB1	RFX1	MEF2C			ZBTB7B	STAT4	STAT1	VDR	RXRA			RREB1	RREB1	RXRA							ZNF217
	RFX2				TCF4	TCF4			SMAD3						ZBTB7B			TCF7	SMAD3				NFIA	RUNX1		RUNX1	SMAD3	MEF2D				TBX21	STAT4	ZBTB7C	SMAD3			SMAD3	SMAD3	SMAD3
	RREB1				TEF	TEF			SPI1									YY1	TCF7				NFIX	RXRA		SMAD3	SPIB	NFATC1				TCF7	TBX21		SOX13			TCF7L2	SOX13	SOX12
	RUNX1				ZBTB16				STAT3										TGIF1				NR2F2	SMAD3		SP3	TGIF1	NR4A2				TGIF1	TGIF1		SREBF1			TEAD1	SREBF1	SP2
	RXRA								STAT5A														PBX1	TEAD1		SPI1		PAX5							SREBF2			TGIF1	TCF7L2	SP3
	SMAD3								TAL1														RARA			ZBTB7A		POU2F2							TEF			YY1	TFEB	STAT5A
	STAT3								YY1														RFX2					PRDM4							TGIF1				TGIF1	TBX15
	STAT5B																						SMAD3					REL							VDR				YY1	TCF7L2
	TCF7L2																						TEAD1					RELA												TFAP4
	ZNF217																											RREB1
																												SMAD3
																												SP3
																												SREBF2
																												TCF4
																												YY1
																												ZBTB16
[truncated: 34 more columns]

## Sheet: Extended_CRC
Astrocytes	BI_Adipose_Nuclei	BI_Brain_Angular_Gyrus	BI_Brain_Anterior_Caudate	BI_Brain_Cingulate_Gyrus	BI_Brain_Hippocampus_Middle	BI_Brain_Inferior_Temporal_Lobe	BI_Brain_Mid_Frontal_Lobe	BI_CD34_Primary_RO01480	BI_CD34_Primary_RO01536	BI_CD34_Primary_RO01549	BI_CD4_Memory_Primary_7pool	BI_CD4_Memory_Primary_8pool	BI_CD4_Naive_Primary_7pool	BI_CD4_Naive_Primary_8pool	BI_CD4p_CD225int_CD127p_Tmem	BI_CD4p_CD25-_CD45RAp_Naive	BI_CD4p_CD25-_CD45ROp_Memory	BI_CD4p_CD25-_Il17-_PMAstim_Th	BI_CD4p_CD25-_Il17p_PMAstim_Th17	BI_CD8_Memory_7pool	BI_CD8_Naive_7pool	BI_CD8_Naive_8pool	BI_Duodenum_Smooth_Muscle	BI_Skeletal_Muscle	BI_Stomach_Smooth_Muscle	CD14	CD19_primary	CD20	CD34_adult	CD34_fetal	CD3	CD56	CD8_primary	Colon_Crypt_1	Colon_Crypt_2	Colon_Crypt_3	DND41	Fetal_Intestine	Fetal_Intestine_Large	Fetal_muscle	Fetal_Thymus	GM12878	H1	H2171	HCC1954	HCT-116	HeLa	HepG2	HMEC
ABHD2	ABCD2	ABHD2	ABCG1	ABCG1	ABCG1	ABCG1	ABHD2	ABCC1	ABCC1	ABCC1	AA06	AIM1	ABLIM1	ABLIM1	ADAM8	ABLIM1	ADAM19	AAK1	AAK1	ABCB8	ABLIM1	ABLIM1	ABHD2	ABCA1	ABCC1	AAK1	ADA		ABCC4	ADCY7	ABCG1	ABHD2	ACBD5	ABHD2	ABCC3	ABO	AAK1	AASDH	AASDH	ABCA8	AEBP1	AGPAT5	A2ML1	ABTB1	ABCA4	ABCC2	ACSL5	A2M	ABHD10
ABL1	ABL1	ABL1	ABHD2	ABHD12	ABHD2	ABHD2	ACER2	ACTN4	ABHD2	AHNAK	ABLIM1	AKNA	AIM1	AHNAK	AHNAK	ACTN1	ADRBK1	ABLIM1	ACTN4	ACSM3	ACTN1	ACTN1	ABL1	ABCG1	ABHD2	ABHD2	ADAM19		ADCY7	ANK1	AHNAK	ABLIM1	ACTN4	ABLIM1	ACOT7	ACADVL	ABCG1	ABHD2	AATF	ABI3BP	AKAP2	AKAP11	AASS	ACSM4	AFAP1	ABCC3	ACTN4	ABCG5	ABLIM1
ACTBL2	ABLIM1	ABTB1	ACAD9	ABHD2	ABL1	ABL1	ACSS1	AHNAK	ACTN4	AKNA	ACTN4	AMD1	AKNA	AIM1	AIM1	AGER	AIM1	ACTR1B	ADAM19	ACTN4	AHNAK	AKNA	ACTN1	ABHD2	ABL1	ACTN1	ADORA2A		ADRBK1	C14ORF43	AIM1	ACTN4	ADRB2	ACOT7	ACSF3	ACSS1	ACOXL	ABHD5	ACAA2	ABL1	AKNA	ALPK1	AEBP2	ACTL8	AIM1	ABHD10	ADAM12	ABHD2	ACTBL2
ACTN1	ABLIM3	ACER2	ACER2	ABL1	ACER2	ABTB1	ACTN4	AKAP13	ACTR3C	AMZ1	ACTR3C	AMZ2	ANKRD44	AKNA	AKAP13	AHNAK	AKNA	ADCY7	ADAM8	ACTR3C	AKAP13	AMZ2	ACTN4	ABLIM2	ABTB1	ACTN4	AHNAK		ANK1	C1ORF116	AKAP13	ADA	AHNAK	ACSL5	ACSS1	ACTB	ACPL2	ACOT13	ACSL5	ABTB1	AMZ2	ALPK2	AFF1	ADAM6	AKR1B15	ACSL5	AEBP2	ACOX2	ACTL7A
ACTN4	ACACB	ACSS1	ACSL6	ACER2	ACSL6	ACER2	ADORA1	AKNA	AFF1	ANGPT1	ADAM19	AMZ2P1	ANXA6	AMZ2	AKNA	AIM1	AMZ2	ADSL	ADCY7	ADAMTS14	AKNA	ANKRD44	ADAM19	ABTB1	ACACB	ACTR3	AIM1		ARL4A	CCND3	AKNA	ADAM8	AIM1	ACSS1	ACTG1	ACTG1	ADA	ACSL5	ACSS1	ACBD5	AMZ2P1	ANKRD44	AKAP7	ADARB1	AMOTL2	ACTG1	AFAP1	ACSM2A	ACTN1
ADAM12	ACO1	ACTN4	ACSS1	ACSL6	ACSS1	ACSL6	AGAP1	AKT1S1	AHNAK	ANKRD28	AHNAK	ANKRD44	AP3M2	AMZ2P1	AMZ2	AKNA	AMZ2P1	AHNAK	ADORA2A	AHNAK	AKT1S1	ARHGAP25	ADM	ACACB	ACSS1	ADCY7	AKAP13		ASH2L	CORO1C	AMICA1	ADCY7	AKAP13	ACTG1	ACTN1	ACTN4	ADRBK1	ACTN1	ACTN1	ACSS1	ANKRD13B	ANKRD46	AKIRIN1	ADCYAP1R1	ANKRD40	ACTN4	AHNAK	ACSM2B	ACTN4
ADAM19	ACSL5	ADAM12	ACTN1	ACSS1	ACTN4	ACSS1	AHDC1	AMPD2	AKAP13	ANTXR2	AKAP13	ARHGAP25	APBB1IP	ANKRD44	AMZ2P1	AMZ2	ANKRD44	AKAP11	AHNAK	AKAP13	AMZ2	ARHGDIB	ADORA3	ACSS1	ACTA2	ADD3	AKAP2		B3GNT2	COX4I2	AMZ2	ADRB2	AMZ2	ACTN4	ACTN4	ADAP1	AFF1	ACTN4	ACTN4	ACTN2	ANKRD32	APBB1IP	ALPPL2	AES	ANKRD46	ADORA2B	AMOTL1	ACTL7A	ACYP2
ADAM9	ACSS2	ADAMTS4	ACTN4	ACTN4	ADA	ACTN4	AMOTL2	ANGPT1	AKNA	AP3M2	AKNA	ARHGDIB	ARHGDIB	ANTXR2	ANKRD13D	AMZ2P1	APOBEC3H	AKAP13	AIM1	AKNA	ANKRD31	ARHGEF3	AFAP1	ACTB	ACTG2	ADORA3	AKNA		BCL2L1	CPEB4	AMZ2P1	AHNAK	AMZ2P1	ADAP1	ACY1	ADRBK1	AKAP2	ADD3	ACVR1B	ACTN4	ANXA11	ARID5B	ANK2	AHDC1	ANO6	AHNAK	ANKRD40	ACTN4	ADAM17
ADAMTS12	ACTN4	ADCK3	ADA	ADA	ADAM12	ADA	APBA2	ANKRD28	AMD1	ARHGAP25	ALDOA	ARHGEF3	ARHGEF1	ANXA6	ANKRD44	ANKRD44	ARHGAP25	AKNA	AIM2	AMZ2	ANKRD44	ARL4C	AFF1	ACTN2	ACTN1	ADPGK	AMZ2		BTBD19	CRYBA4	ANKRD44	AIM1	ANKRD44	ADRB1	ADAM8	AFAP1	AKNA	AFF1	ADD3	ACVRL1	APBB1IP	B3GNT2	ARCN1	AK5	ANXA2	ANGPT2	ANXA2	AGBL3	ADAT2
ADAMTS14	ADA	ADCY5	ADAM12	ADCK1	ADAP1	ADAMTS8	APBB1	ANKRD42	ANGPT1	ARHGAP9	AMICA1	ARID5B	ARHGEF3	AP3M2	ANXA6	ANXA6	ATP5O	AMICA1	AK2	ANK1	APOL6	ATP5O	AHNAK	ACTN4	ACTN4	ADRB2	ANKRD13A		C14ORF182	CYP11A1	ANXA6	AKNA	ANKRD46	AFAP1	ADRB1	AGXT2L2	AMZ2	AGFG1	ADM	ADAM19	ARHGAP25	B4GALT1	ARHGAP18	ALPL	ARHGEF38	ANKRD30BL	APEX2	AGFG1	AFAP1-AS1
ADAMTS6	ADAMTS4	ADD1	ADAR	ADCK3	ADCK3	ADCK3	ARHGAP1	ANTXR2	ANKRD28	ARHGDIB	AMN1	ARIH1	ATM	APBB1IP	AP3M2	AP3M2	BAK1	AMZ2	AKAP13	ANKRD11	APOLD1	BACH2	AMOTL1	ADA	ADA	AFF1	ANKRD16		C14ORF4	EED	APBB1IP	AMZ2	ANXA6	AGAP1	ADRBK1	AHNAK	AMZ2P1	AHNAK	AFF1	ADAMTS14	ARHGDIB	BLM	ARHGAP23	ANGPTL2	BNC2	ANXA11	AQP2	AIFM3	AIM1
ADAMTSL1	ADAMTS5	ADORA1	ADCK3	ADCY5	ADCY5	ADCY5	ARHGEF2	ANXA1	ANP32B	ARHGEF2	ANK1	ATXN7	ATP5O	APOA5	APOL3	APOLD1	BCL11B	AMZ2P1	AKNA	ANKRD13D	ARHGAP5	BCL11B	AMZ2	ADCK3	ADAM19	AGTPBP1	ANKRD36BP2		C14ORF43	FAM194A	APOBEC3H	AMZ2P1	AOAH	AGXT2L2	AFAP1	AHNAK2	ANAPC1	AKAP13	AGFG1	ADAMTS4	ARHGEF7	BLNK	ARHGAP42	ANKS1A	C1ORF107	ANXA2	AQP3	AKIRIN2	AKAP12
ADCK4	ADCY5	ADORA3	ADCY5	ADD1	ADORA1	ADORA1	ATP1B1	APOC3	ANTXR2	ARID2	ANKRD11	BCL11B	B2M	APOBEC3H	ARHGAP25	ARHGAP25	BCLAF1	ANKRD11	AMICA1	ANKRD44	ARHGAP9	BCL9L	ANKRD56	ADHFE1	ADCY5	AGTRAP	ANKRD44		C1ORF116	FAM46C	ARF6	ANGPTL6	AP3M2	AHNAK	AGAP1	AIFM3	ANKFN1	ALDH18A1	AGPAT2	ADAMTS5	ARL4C	C14ORF43	ARHGEF10L	ARFGAP3	C1QTNF6	ANXA3	AQP7	ALDH1A1	AKIRIN2
ADD3	ADIPOR2	AGAP1	ADD1	ADORA3	ADORA3	ADORA3	BCAR1	ARHGAP22	APOLD1	ARID5B	ANKRD44	BIRC3	BACH2	APOLD1	ARHGDIB	ARHGAP9	BRD2	ANKRD13B	AMPD2	AP3M2	ARHGDIB	BRD2	ANKS1A	ADSSL1	AFAP1	AHNAK	ANXA6		C6ORF223	FAM83A	ARHGAP25	ANKRD36BP2	APBA2	AIFM3	AGPAT2	AK3	ANKRD1	ALDOB	AGPAT3	ADAMTS9	ARPP21	CAB39	ARID1A	ARHGAP26	C21ORF63	AP1S3	ARF6	AMICA1	AKR1E2
AFAP1	ADM	AGPAT4	ADORA1	ADRBK1	AEBP1	AFF1	BCL2L1	ARHGAP25	ARF6	ARL6IP5	ANTXR2	BTG2	BCL11B	ARHGAP25	ARID2	ARHGDIB	BTN2A1	ANKRD42	AMZ2	APOBEC3H	ARHGEF1	C10ORF105	ANXA11	AFF1	AFF1	AIM1	APBB1IP		CACNA1I	FKBP5	ARHGAP26	ANKRD44	APBB1IP	ALDH2	AGPAT3	AKAP1	ANKRD22	AMOTL2	AGXT2L2	AFAP1	ASB9P1	CCDC12	ARID1B	ARRDC2	C6ORF223	APRT	ARHGEF2	APOC3	ALCAM
AFF3	ADRBK2	AGTPBP1	ADORA3	AGAP1	AGAP1	AGAP1	BCL9L	ARHGAP9	ARHGAP15	ASH1L	ANXA1	C17ORF37	BCL6	ARHGAP26	ARL4C	ARHGEF3	C10ORF105	ANKRD44	AMZ2P1	APOL6	ARL4C	C14ORF43	ANXA2	AHNAK	AHDC1	AIM2	APOA5		CBFA2T3	FLJ35776	ARHGAP9	ANXA6	APOA5	ANKRD40	AGXT2L2	AKT1	APBB1IP	ANKRD40	AKAP13	AFAP1L1	ATF7IP	CCDC150	ASPH	ASB9P1	CALML3	ARHGAP12	ASPH	ARHGAP11A	AMIGO2
AHNAK	AFF1	AHDC1	AFF1	AGTPBP1	AGPAT4	AGPAT4	BHLHE40	ARHGDIB	ARHGAP25	ATP2C1	ANXA11	C1ORF63	C10ORF105	ARHGAP9	ARPC1B	ARID2	C13ORF15	ANKRD46	ANKDD1A	ARHGAP11B	ASB9P1	C14ORF64	ANXA4	AKAP1	AKAP1	AK2	ARAP1		CD82	GATA5	ARHGDIB	AP3M2	APOBEC3H	ANKRD56	AHDC1	AMN	ARHGAP25	ANKRD46	ALDH18A1	AFAP1L2	B2M	CCDC88C	ATF7IP	ASPH	CD44	ARHGAP18	ATF1	ARHGAP11B	AMOTL1
AKR1E2	AHDC1	AJAP1	AGAP1	AHDC1	AGTPBP1	AGTPBP1	BIN1	ARHGEF2	ARHGDIB	ATP8B4	AP3M2	C1QTNF9	C13ORF15	ARHGDIB	ATP5O	ARID4B	C14ORF182	ANXA11	ANKRD13D	ARHGAP25	ATM	C17ORF37	APOLD1	AKAP13	ALPK3	AKAP13	ARHGAP25		CDKN1B	GDPD5	ARHGEF1	APBB1IP	APOL6	ANKRD57	AHNAK	ANKRD56	ARHGDIB	ANKRD56	ALDH1B1	AGAP1	BACH2	CD58	ATXN7L1	ASS1	CD47	ARHGAP29	ATXN10	ARHGAP12	ANKRD10
ALCAM	AK2	AK5	AGPAT4	AKAP6	AGTRAP	AJAP1	C10ORF10	ARID2	ARHGEF2	B2M	APBB1IP	C21ORF33	C14ORF4	ARID5A	B2M	ARIH1	C14ORF4	AP3M2	ANKRD44	ARHGAP9	ATP5O	C1ORF151	ARHGAP26	ALPK2	ANGPTL1	AKIRIN2	ARHGAP9		CIC	GFI1B	ARHGEF3	APOA4	ARAP1	ANKRD9	AIFM3	ANKRD9	ARHGEF3	ANXA13	ALDH2	AHDC1	BAZ2A	CD70	B3GAT1	ATN1	CD9	ARHGDIA	AVPI1	ARHGAP18	ANKRD11
AMIGO2	AKAP2	AKAP6	AGTPBP1	AKNA	AHDC1	AK5	C10ORF108	ARID5B	ARID1A	BANP	ARHGAP18	C21ORF96	C14ORF64	ARL4C	B4GALT1	ARL4C	C14ORF43	APBB1IP	ANKRD46	ARHGDIB	ATXN1	C20ORF112	ARHGEF10L	ALPK3	ANGPTL2	AKNA	ARHGEF18		CISH	GPR137	ARL4C	APOBEC3G	ARAP2	ANXA11	AKNA	ANP32A	ARHGEF7	ANXA2	AMACR	AHNAK	BCL11A	CD80	BAT2L1	ATOH8	CELSR1	ARMC4	B4GALT1	ARHGAP26	ANKRD46
AMOTL1	AKR1C1	AMOTL2	AHDC1	AMOTL2	AIF1L	AKAP6	C11ORF9	ARL6IP5	ARID1B	BCL11A	ARHGAP25	C5ORF56	C1ORF192	ASB2	BAZ2A	ARL6IP5	C18ORF1	APOL3	ANP32A	ARHGEF2	B2M	C21ORF96	ARHGEF17	AMOTL1	ANKFY1	ALDH2	ARHGEF2		CORO1A	GYPC	ARL6IP5	APOL6	ARHGAP25	ANXA2	ALDH2	ANXA11	ARL4C	ANXA4	AMICA1	AK1	BCL11B	CD86	BCL11A	ATP1A1	CHD9	ASB7	BAT2L1	ARHGEF16	ANKRD56
AMOTL2	ALG9	ANGPTL2	AJAP1	AMPD3	AJAP1	AKNA	C14ORF23	ATP2C1	ARID2	BCR	ARHGDIB	C6ORF62	C20ORF112	ASB9P1	BCL11B	ARRDC2	C20ORF29	ARF6	ANTXR2	ARID2	B4GALT1	C2ORF89	ARID5B	AMPD1	ANKS1A	AMICA1	ARID5B		COX4I2	HBE1	ARPC1B	APOLD1	ARHGAP26	ARAP1	AMDHD2	ANXA2	ARPP21	AP3S2	AMOTL2	AKAP12	BCL2L1	CELF2	BCOR	BCL11A	CITED4	ASB9P1	BCAR3	ARHGEF33	ANXA1
ANKRD28	ALPK3	ANK2	AKNA	ANGPTL2	AKNA	AMOTL2	C14ORF4	B2M	ARID5B	BRD2	ARHGEF3	C9ORF156	C21ORF33	ASMTL	BCL2	ASB9P1	C2ORF46	ARHGAP15	AP3M2	ARL4A	BACH2	C9ORF156	ASAM	ANGPTL2	ARFGAP2	AMN1	ATF7IP		CPEB4	HEMGN	ATF7IP	ARAP1	ARHGAP9	ARF6	ANKRD40	AQP12A	ARRDC4	APPL2	ANKRD46	AKAP13	BMF	CLDN23	BDNF	BDP1	CLDN1	AZIN1	BCL2L1	ARID5B	ANXA2
ANO6	AMOTL2	ANK3	AMPD2	ANK2	AMOTL2	AMPD3	C14ORF43	BANP	ARL4A	BRF1	ARID2	CALM1	C21ORF96	ATF7IP	BCL3	ATM	C5ORF56	ARHGAP25	APBB1IP	ARL4C	BAK1	CAPZB	ASB2	ANO6	ARHGAP10	AMZ2P1	B2M		CSK	HIST2H2BC	ATP2B4	ARF6	ARHGDIB	ARHGAP21	ANKRD56	ARF6	ATP2B4	ARHGAP17	ANKRD56	AKAP2	BRD2	CLECL1	BEND3	BEGAIN	CTNND1	BAHCC1	BCL3	ARL5B	ANXA3
ANXA2	ANGPTL2	ANKRD43	AMPD3	ANK3	AMPD3	AMZ1	C16ORF5	BRD2	ARL6IP1	C14ORF43	ARID5B	CAPZB	C2ORF89	ATM	BCL9L	ATP5O	C6ORF129	ARHGEF3	APOBEC3H	ARPC5L	BCL11B	CASP8	ATF7IP	ANXA11	ARHGEF10L	ANKRD11	B4GALT1		CTDSP1	HPS1	ATP5O	ARHGAP25	ARHGEF3	ARHGAP26	ANKRD57	ARFIP1	ATP5O	ARHGAP21	ANKS1A	AKAP6	BUB1	CLLU1OS	BNC2	C11ORF92	DHRS3	BAIAP2	BHLHE40	ASB9P1	AOAH
APOLD1	ANKS1A	ANKS1A	AMZ2	ANKS1A	ANGPTL2	ANGPTL2	C1ORF198	BTBD19	ARL6IP5	C1ORF55	ARL4A	CCR7	C6ORF129	ATP5O	BHLHE40	ATXN7	C9ORF156	ARID4B	APOL6	ARVCF	BCL9L	CCDC88C	ATP1B1	ANXA2	ARHGEF17	ANKRD12	BACH2		CYP11A1	HSPA6	ATXN1	ARHGAP26	ARID2	ARHGEF10L	ANKRD9	ARHGEF10L	ATP6AP1L	ARHGAP27	ANKS6	ALDH4A1	C10ORF105	COTL1	BTBD3	C12ORF34	DYSF	BCL2L1	BZW1	ASXL1	APBB2
ARF6	ANO6	APAF1	AMZ2P1	APAF1	ANK3	ANK2	C20ORF112	C14ORF43	ARPC2	C21ORF96	ARL4C	CD2	C9ORF156	ATXN1	BIRC3	BACH2	CAMK4	ARID5B	ARF6	ASH1L	BRD2	CCND3	ATP2B4	APOBEC2	ARHGEF25	ANKRD44	BANK1		DENND2D	HSPA7	B2M	ARHGAP9	ARL4C	ASAP2	ANXA11	ARHGEF16	BCL11A	ARHGEF10L	ANO9	ALPK3	C10ORF26	CYTH1	C10ORF129	C12ORF57	EDN1	BCL3	C10ORF78	ATP1B1	AREG
ARHGAP23	ANXA11	APBA2	ANGPTL2	APBA2	ANKS1A	ANK3	C20ORF117	C21ORF96	ASH2L	C22ORF26	ASB9P1	CD28	CAMK4	B2M	BRD2	BCL11B	CAPZB	ARL4C	ARHGAP25	ATF7IP	BTBD19	CCR7	ATP8B1	ARFGAP2	ASAM	ANKRD55	BCL10		DNAJB12	INPP5D	B3GALT2	ARHGDIB	ARL6IP5	ASB13	APOLD1	ARMC7	BCL2	ARHGEF16	ANXA13	AMOTL2	C11ORF74	DAD1	C11ORF30	C14ORF4	EDN2	BCL9L	C14ORF182	AVPI1	ARF6
ARHGAP31	ANXA2	APBB1	ANKRD43	APBB2	APAF1	ANKS1A	C20ORF29	C3ORF21	ATG16L2	C3ORF21	ASF1A	CD44	CASP8	BAK1	BTBD19	BCL9L	CCDC88C	ARPC2	ARHGAP9	ATM	BTG1	CD2	ATXN1	ARHGAP1	ASB2	ANPEP	BCL11A		DOLPP1	JUNB	B4GALT1	ARHGEF1	ARPC2	ASB9P1	AQP1	ARRB1	BCL2L1	ARID3A	ANXA2	ANGPTL2	C13ORF15	DENND2D	C12ORF47	C14ORF48	EGFR	BCOR	C14ORF34	AXIN2	ARHGAP12
ARHGEF17	ANXA5	APOB	ANKRD9	APCDD1	APBA2	ANXA2P1	C2ORF52	C5ORF4	ATP2C1	C5ORF56	ATG16L1	CD5	CCDC88C	BCL11B	C10ORF105	BCLAF1	CCND2	ATG16L1	ARHGDIB	ATP5L	BTG2	CD44	AUH	ARHGAP26	ATL2	ANTXR2	BCL2		DUSP1	KLF13	BACH2	ARHGEF3	ARPC5L	ATF3	ARFIP1	ASPG	BCL9L	ARID5B	ANXA3	ANK2	C13ORF18	DENND4A	C14ORF132	C14ORF93	EGOT	BHLHE40	C14ORF4	BAMBI	ARHGAP18
ARHGEF2	APBB1IP	APOBEC4	ANKS1A	APOA1	APOA1	APAF1	C2ORF61	C5ORF56	ATP6V0A2	C5ORF62	ATP1A1	CD53	CCR7	BCL2	C14ORF138	BIRC3	CCND3	ATP1A1	ARHGEF2	ATP5O	C10ORF105	CD55	AZIN1	ARID5B	ATP1A2	ANXA11	BCL9L		EMID1	KLHL30	BAK1	ARID2	ATF7IP	ATP1B1	ARHGAP21	ATF3	BMP10	ASB9P1	ANXA4	ANKS1A	C14ORF4	DRAM1	C14ORF181	C15ORF39	EIF3H	BRD2	C14ORF43	BCAT1	ARHGAP25
ARHGEF40	APBB2	APP	APAF1	APOB	APOB	APBA2	C6ORF114	C5ORF62	ATP8B4	C7ORF41	ATP2B4	CD6	CD2	BCL9L	C14ORF4	BRD2	CD247	ATP2B4	ARHGEF3	ATXN1	C13ORF15	CD7	B2M	ARRDC2	ATP2B4	ANXA2	BCOR		EMP3	LGALS9	BATF	ARL4C	ATG16L1	ATP2A3	ARHGEF10L	ATP1A1	BMPR1B	ASH2L	AP2S1	ANP32A	C14ORF64	DUSP10	C14ORF4	C1ORF89	ELF3	BTC	C16ORF45	BDH1	ARHGAP29
ARID5B	APOL6	ARAP2	APBA2	APOBEC4	APP	APBB2	C8ORF46	C7ORF41	ATXN7	CARD8	ATXN7	CD69	CD247	BHLHE40	C14ORF43	BTG1	CD28	ATXN1	ARL4C	B2M	C14ORF64	CD8A	B4GALT1	ASAH1	ATXN1	AOAH	BLK		FAM134C	LMO2	BCL11B	ARPC1B	ATM	ATP2C2	ASB13	ATP1B1	C10ORF105	ATP1A1	AP3S2	ANXA2	C18ORF1	DUSP22	C16ORF72	C1QA	ERMP1	C10ORF116	C17ORF44	BMP4	ARID1B
ARRDC3	AQPEP	ARFGAP2	APBB1	APP	ARAP1	APCDD1	C9ORF50	C9ORF156	B4GALT6	CASP2	B2M	CD97	CD28	BIRC3	C17ORF37	BTN2A1	CD3G	ATXN7	ARL6IP5	B3GALT4	C16ORF54	CD97	BAT2L1	ASB2	BAHCC1	APBB1IP	BLNK		FAM194A	LOC100272217	BCL2	ARPC2	ATP2B4	ATP8B1	ASB9P1	ATP2A3	C12ORF35	ATP2A2	APOC3	APOBEC2	C20ORF112	EHD1	C16ORF75	C1QL1	ERRFI1	C12ORF36	C18ORF10	C12ORF34	ARID5B
ASB1	ARHGAP18	ARHGAP1	APCDD1	ARAP1	ARHGAP1	APOA1	CD180	CARD8	BANP	CASP8	B4GALT1	CDC42SE2	CD3D	BRD2	C18ORF1	C10ORF105	CD40LG	B4GALT1	ARNTL	B4GALT1	C17ORF49	CELF2	BCL11A	ASB5	BCL11A	APOBEC3A	BMF		FAM38A	LOC541471	BCL9L	ARPC5L	ATP5O	B3GNT3	ASPG	ATP8B1	C14ORF64	ATP8B1	APPL2	APOL2	C21ORF96	ELF1	C1GALT1	C20ORF112	ETS2	C14ORF182	C1ORF116	C14ORF119	ARNTL
ASB7	ARHGAP29	ARHGAP23	APOA1	ARAP2	ARHGAP22	APOBEC4	CD9	CASP2	BAZ2A	CBX3	BAI3	CELF2	CD40LG	BTG1	C1QTNF9	C13ORF15	CD44	BACH2	ARPC1B	BAI3	C1QTNF9	CYFIP2	BCL2L14	ASCC2	BCL6	APOL3	BRD2		FKBP5	LRRC8D	BIRC3	ASB9P1	ATP8A1	B3GNT5	ATF3	ATXN7L3	C14ORF70	AUH	ARAP1	APOL3	C6ORF129	ENPP6	C1ORF100	C21ORF33	EXT1	C14ORF4	C1QTNF6	C14ORF80	ARNTL2
ASB9P1	ARHGAP31	ARHGEF2	APOBEC4	ARHGAP1	ARHGAP23	APP	CDK18	CASP8	BAZ2B	CCDC19	BAT5	CFLAR	CD44	BTG2	C21ORF33	C14ORF183	CD5	BANP	ARPC5L	BAZ2A	C2ORF89	CYTIP	BCL6	ATOH8	BCL9L	AQP9	BTBD19		FLJ32224	LY86-AS1	BRD2	ATF7IP	B2M	B3GNT7	ATP1B1	AUH	C18ORF1	AVPI1	ARF6	APOLD1	CAMK1D	ENTPD1	C2ORF3	C21ORF54	F3	C17ORF82	C20ORF29	C16ORF70	ASAP2
ATOX1	ARID1B	ARID5B	APP	ARHGAP22	ARHGEF10	ARAP1	CELSR2	CBX3	BCL11A	CCDC6	BAZ2A	CLEC2D	CD5	C10ORF105	C21ORF96	C14ORF4	CD7	BATF	ASB2	BCL11B	C5ORF56	DAD1	BHLHE40	ATP1A2	BHLHE40	ARAP1	BTG1		FLJ35776	MIR142	BRD7	ATM	B4GALT1	B3GNT8	ATP2C2	AXIN1	C1ORF31	AZIN1	ARHGAP17	AQP1	CAMK4	ETV6	C2ORF34	C22ORF31	FAM84B	C19ORF28	C21ORF63	C17ORF96	ASB7
ATP1B1	ARID5B	ARMC3	ARAP1	ARHGAP23	ARHGEF10L	ARAP2	CHST3	CCDC97	BCL2L1	CCDC97	BCL11B	CMAH	CD6	C13ORF15	C5ORF56	C14ORF43	CD82	BCL11B	ATM	BCL2L1	C6ORF129	DDX5	BOC	ATP1B1	BID	ARF6	BTLA		GALNT2	MTFP1	BTBD19	ATP2B4	BACH2	B4GALNT3	AXIN1	AZIN1	C20ORF112	B3GNT3	ARHGAP27	ARHGAP12	CAPZB	FAM9C	C2ORF46	C9ORF106	FLJ32224	C1QTNF6	C21ORF84	C20ORF112	ASB9P1
ATXN1	ASCC2	ARRDC2	ARAP2	ARHGEF2	ARHGEF17	ARAP3	CIC	CCM2	BHLHE40	CCNL1	BCL2L1	CNOT6L	CD69	C14ORF182	C6ORF129	C14ORF64	CDC14A	BCL2	ATP1A1	BCL6	C9ORF156	DENND2D	C10ORF54	AXIN2	BOC	ARHGAP1	C10ORF105		GDF15	MXI1	BTG1	ATP5O	BAK1	B4GALT1	AZIN1	B2M	C20ORF197	B3GNT5	ARHGEF10L	ARHGAP15	CBFA2T3	FBXW7	C4ORF39	C9ORF79	FOXI1	C6ORF132	C22ORF27	C2ORF29	ATG5
AXL	ASPH	ATP1B1	ARHGAP1	ARID5B	ARHGEF2	ARFGAP2	CLSTN1	CD164	BICD2	CD164	BHLHE40	CYTH1	CD97	C14ORF183	C9ORF156	C1ORF151	CDC42SE2	BCL2L1	ATP2B4	BCL9L	CAPZB	DHRS12	C11ORF96	AZIN1	BRD7P3	ARHGAP25	C10ORF76		GDPD5	NCRNA00152	C10ORF105	AUH	BATF	BAK1	B3GNT3	B3GNT3	C21ORF96	B3GNT7	ARID3A	ARHGAP26	CCDC114	FCHSD2	C5ORF38	CACNA2D4	GCLC	C6ORF27	C2ORF18	C2ORF72	ATP12A
AZIN1	ATP2B4	ATP5G2	ARHGAP23	ARL6IP5	ARHGEF37	ARHGAP1	CNTN2	CD34	BNIP2	CD34	BIRC3	CYTIP	CDC14A	C14ORF43	CCDC69	C1ORF200	CDNF	BCL9L	ATP5O	BHLHE40	CASP8	DNAJB1	C14ORF4	B3GNT5	C10ORF108	ARHGAP26	C12ORF35		GFI1B	NPRL3	C13ORF15	B2M	BAZ1A	BCAR1	B3GNT5	B3GNT5	C5ORF13	B4GALT1	ARID5B	ARHGAP29	CCDC69	FNBP1	C8ORF22	CAPN9	GCNT1	C9ORF106	C4BPB	C2ORF82	ATP1B1
BAG3	ATP5O	ATP5H	ARHGEF17	ARMC3	ARHGEF7	ARHGAP21	COBL	CD53	BTG2	CD69	BRD7	DAD1	CELF2	C16ORF54	CCDC88C	C1ORF93	CELF2	BIN2	ATP8B2	BRD2	CCR7	DOCK10	C14ORF43	B4GALT1	C10ORF26	ARHGAP30	C13ORF18		GRAMD4	PCSK6	C14ORF183	B3GNT7	BCL11B	BCL2L1	BAK1	B3GNT7	CAMK1D	B4GALT5	ARL8A	ARHGEF12	CCDC88C	FOXN3	C8ORF34	CASZ1	GLTSCR1	C9ORF50	C6ORF223	C3	ATP2B4
BCAR1	ATP8B4	ATP8A1	ARID5B	ARRDC2	ARL6IP5	ARHGAP23	CORO2B	CD69	C10ORF105	CD74	BTG1	DDX5	CFLAR	C17ORF37	CCDC97	C1QTNF9	CLEC2D	BIRC3	ATXN1	BRD7	CD2	DUSP2	C15ORF52	BAG3	C11ORF66	ARHGEF2	C14ORF181		GYPC	PDZK1IP1	C14ORF4	B4GALT1	BCL2	BDH1	BANP	BAIAP2	CAPG	BAHCC1	ASB13	ARHGEF17	CCND3	GMPR	C9ORF85	CBFA2T2	GPCPD1	CAPN2	C7ORF40	C5ORF15	ATXN1
BCAR3	AZIN1	B3GAT1	ARNT2	ASPA	ARNT2	ARHGEF2	CPNE2	CD97	C12ORF65	CD97	C10ORF105	DGKA	CISH	C21ORF33	CCND2	C20ORF112	CMAH	BRD2	ATXN2L	BRP44	CD3G	EEF2K	C20ORF117	BAHCC1	C14ORF181	ARID1A	C14ORF182		HAAO	PIK3R1	C14ORF43	BAZ2A	BCL2L1	BHLHE40	BCL3	BCAR1	CASP8	BCAR1	ASB9P1	ARHGEF2	CCR7	GPR15	CA14	CBLN1	HAS3	CAPZA2	C8ORF75	C6ORF106	B3GNT5
BCAS1	B4GALT1	BAHCC1	ARPP21	ASPDH	ARRDC2	ARHGEF3	CROCC	CDC42SE2	C14ORF43	CD99	C10ORF128	DUSP1	CLEC2D	C21ORF91	CCNI	C21ORF33	CMTM7	BRD4	B2M	BTG2	CD44	ERF	C5ORF62	BCAR1	C14ORF43	ARRB1	C14ORF183		HAGH	PIM1	C14ORF64	BCL11B	BCL6	C12ORF36	BDH1	BCL9L	CCDC69	BCL10	ASH2L	ARHGEF3	CCR9	GPR183	CADPS	CCDC130	HIF1A	CARD10	C9ORF106	C7ORF30	BAG3
BCL10	BAG3	BAT2L1	ARRDC2	ATF1	ASPA	ARID5B	CSRP1	CDK6	C19ORF61	CDC42SE2	C14ORF4	DUSP16	CMTM7	C5ORF56	CCNL1	C21ORF96	CORO1A	BTG1	B4GALT1	C10ORF105	CD53	ETS1	C8ORF40	BCL2L1	C15ORF52	ASAP1-IT	C14ORF43		HBE1	RBM38	C15ORF53	BCL2	BCL9L	C14ORF181	BEGAIN	BHLHE40	CCL1	BCL11A	ATP1A1	ARHGEF7	CD2	GRHPR	CCDC54	CCDC33	HIST2H3C	CAV1	C9ORF50	C7ORF69	BCAR3
BCL2L1	BCL2	BCL2L1	ATOH8	ATF7	ATF1	ARL6IP5	CTDSP2	CDKN1B	C1ORF55	CDK6	C14ORF43	EEF1A1	CROCC	C6ORF129	CCR7	C2ORF89	COTL1	C10ORF105	BACH2	C13ORF15	CD6	EVL	C9ORF71	BCL3	C20ORF112	ASGR2	C14ORF80		HOXB2	RIC3	C16ORF54	BCL2L1	BCLAF1	C14ORF2	BHLHE40	BRD1	CCND3	BCL2L1	ATP8A1	ARID2	CD247	HEG1	CDH1	CCDC34	HK1	CCND1	CAMK2G	CABLES1	BCL10
BCL6	BCL2L1	BID	ATP1B1	ATN1	ATOH8	ARNT2	CUEDC1	CELF2	C1ORF63	CDKN1B	C18ORF1	EHD1	CSK	C9ORF156	CD2	C3ORF67	CXCR4	C13ORF15	BAK1	C14ORF43	CD69	FAIM3	CACNA1C	BCL6	C20ORF117	ATF7	C17ORF87		HSPA6	SH2D4B	C18ORF1	BCLAF1	BHLHE40	C14ORF4	BID	BTBD6	CCR7	BCL3	ATP8B1	ARID5B	CD28	HIVEP2	CDH10	CD40	IER3	CDC20	CAPN2	CAPG	BCL2L1
BCL9L	BIN1	BIN1	ATP5H	ATOH8	ATOX1	ARRDC2	CXXC5	CFLAR	C21ORF96	CELF2	C1ORF200	ELOVL5	CXCR5	CA5B	CD247	C5ORF56	CXCR5	C14ORF182	BANP	C17ORF37	CD7	FAM102A	CALM1	BCL9L	C20ORF29	ATF7IP	C18ORF8		HSPA7	SH2D6	C20ORF112	BHLHE40	BIN2	C14ORF43	BIK	C10ORF105	CCR9	BCL9L	AUH	ARSB	CD34	HLA-DRB1	CDH8	CDH12	IER5	CDC25B	CD55	CAPZA2	BCL2L10
BFSP1	BRD2	C10ORF10	ATP8A1	ATP11A	ATP11A	ASPA	DDIT4	CHMP2A	C3ORF21	CFLAR	C1ORF55	EMP3	CYTH1	CAPZA1	CD28	C6ORF129	CXORF65	C14ORF183	BATF	C17ORF49	CD8A	FAM113B	CALM2	BHLHE40	C3ORF21	ATG16L2	C19ORF61		ID2	SH3GL1	C21ORF33	BIN2	BRD2	C16ORF72	BIN1	C10ORF91	CCRL2	BEND6	AZIN1	ASAP2	CD3E	HVCN1	CDK5RAP3	CDK5RAP3	IKZF2	CDC42EP4	CD59	CDKN2C	BHLHE40
BHLHE40	BRD4	C10ORF108	ATXN1	ATP1A1OS	ATP1B1	ASPDH	DDO	CIC	C5ORF4	CGGBP1	C21ORF96	EPHB6	CYTIP	CAPZB	CD40LG	C7ORF23	CYTH1	C14ORF43	BATF3	C1ORF55	CD97	FAM65B	CAP1	BHLHE41	C5ORF40	ATG7	C1ORF186		IER2	SIGLEC6	C21ORF91	BRD2	BTBD19	C17ORF76	BIRC5	C14ORF4	CD180	BHLHE40	B4GALT1	ASB9P1	CD4	ICA1	CDK6	CDKAL1	IL1R1	CDCP1	CD9	CEACAM1	BIRC3
BIN3	C10ORF26	C12ORF34	B3GAT1	ATP1B1	ATP6V0D1	ATF1	DGKZ	CLEC12B	C5ORF56	CHST11	C22ORF29	ESYT2	DAD1	CARD8	CD44	C9ORF156	CYTH4	C14ORF64	BAZ2A	C1ORF89	CELF2	FAM78A	CAPN2	BIN1	C5ORF56	ATP6V0C	C1ORF220		IFITM1	SLC25A37	C2ORF89	BTBD19	BTN3A2	C19ORF21	BMF	C14ORF43	CD1A	BHLHE41	B4GALT5	ASPN	CD79A	IL21R	CECR1	CERKL	IL8	CDKN1B	CDC20	CEBPA	BNC1
BRD2	C14ORF166	C12ORF76	B3GNT7	ATP5H	ATP8A1	ATF7	DPYSL2	CLIC1	C5ORF62	CISD2	C3ORF21	ETS1	DENND2D	CASP8	CD5	C9ORF91	CYTIP	C17ORF37	BCL11B	C21ORF96	CFLAR	FLJ43663	CAPZB	BMF	C6ORF114	ATP6V1A	C21ORF33		IQSEC1	SLC4A1	C5ORF56	BTG1	C10ORF105	C19ORF61	BMP8B	C15ORF39	CD1B	BMP2	BAHCC1	ATF4	CD8A	INPP4A	CECR2	CHGB	IRF2BP2	CLCF1	CDC42EP2	CFLAR	C10ORF78
BRD4	C14ORF4	C13ORF15	BAHCC1	ATP8A1	B3GAT1	ATOH8	DSCAML1	CNST	C6ORF106	CISH	C5ORF4	EVL	DHRS12	CCDC12	CD6	CALM1	DAD1	C18ORF1	BCL2	C3ORF21	CIC	FYB	CAV1	BTBD1	C6ORF186	ATP8B4	C5ORF15		IRF2BP2	STAT5A	C6ORF129	C10ORF105	C13ORF15	C1ORF106	C10ORF105	C17ORF91	CD2	BRP44	BCL10	ATP2B4	CDV3	IQSEC1	CGNL1	CHST1	JAG1	CLDN4	CDCP1	CHDH	C11ORF68
BTBD19	C14ORF43	C14ORF23	BCAR1	ATXN1	B3GNT7	ATP11A	DUSP7	CRHBP	C7ORF41	CLEC2B	C5ORF56	F2RL2	DNAJB1	CCDC64	CD69	CAMK4	DDIT4	C1ORF151	BCL2A1	C5ORF56	CLCN3	FYN	CCDC12	C10ORF10	C7ORF58	ATXN1	C5ORF56		JUNB	TESC	C9ORF156	C14ORF181	C14ORF183	C1ORF177	C10ORF35	C19ORF21	CD247	BTBD7	BCL11A	ATP5G2	CELF2	JARID2	CHN1	CHST13	KIAA0182	CORO1A	CDH10	CHKA	C11ORF91
BTD	C1QTNF6	C14ORF4	BCL11B	B3GAT1	BAHCC1	ATP1A1OS	ECE1	CRTC2	C8ORF44	CLIC1	C6ORF106	FAM107B	DNMT3A	CCDC88C	CD7	CAP1	DEDD2	C1ORF200	BCL2L1	C6ORF129	CLEC2D	GMEB2	CCDC97	C10ORF140	C8ORF46	ATXN7	C8ORF37		KCNH2	TIMP3	CA5B	C14ORF182	C14ORF4	C20ORF112	C10ORF99	C1ORF106	CD38	C10ORF54	BCL6	ATP6V1B2	CHD7	KCNMB2	CHSY1	CLEC16A	KLF10	CSPG4	CDK17	CHN2	C12ORF71
C10ORF108	C21ORF33	C16ORF88	BCL2L1	B3GNT7	BAI1	ATP1B1	ELL	CSDA	CACYBP	CMAH	C6ORF223	FAM117A	EFHC1	CCDC97	CD97	CAPZA1	DENND2D	C1QTNF9	BCL2L14	C6ORF223	CORO7	GPR132	CCND2	C10ORF26	C9ORF50	B2M	CAPZA1		KDM6B	TM9SF3	CAPZB	C14ORF183	C14ORF43	C21ORF125	C14ORF181	C1ORF159	CD3E	C12ORF62	BEND6	AZIN1	CHRNA9	KIAA0247	CITED2	CLSTN1	KRT7	CTBP2	CDKN2A	COG3	C14ORF182
C11ORF46	C22ORF26	C17ORF107	BID	BACE1	BCAR1	ATP2B2	EML6	CSK	CAP1	CNST	C6ORF48	FAM53B	ELOVL5	CCL5	CDC42SE1	CAPZB	DHRS12	C20ORF43	BCL6	C6ORF48	CROCC	GRAP2	CD44	C10ORF71	C9ORF71	B4GALT1	CAPZB		KIAA0182	TMBIM1	CARD8	C14ORF4	C14ORF64	C5ORF32	C14ORF182	C1ORF69	CD7	C14ORF181	BHLHE40	B2M	CHST11	LGALS14	CLDND1	CLSTN2	LGALS3	CTDSP1	CDRT1	CORO1A	C14ORF4
C13ORF33	C2CD2	C18ORF1	BIN1	BAHCC1	BCL2L1	ATP5S	FAM102A	CTCF	CAPZA1	COMMD3	C7ORF58	FAM65B	ERCC1	CCR7	CDC42SE2	CCDC69	DNMT3A	C21ORF96	BCLAF1	C9ORF156	CSK	HECA	CD55	C14ORF181	CACNA1C	B4GALT5	CASP8		KIAA1522	ZDHHC19	CASP8	C14ORF43	C17ORF37	C6ORF132	C14ORF4	C20ORF112	CD82	C14ORF182	BLNK	B4GALT1	CLEC16A	LOC100129269	CLYBL	CLVS1	LIMCH1	CUEDC1	CDYL2	CPEB4	C14ORF43
C14ORF4	C6ORF145	C1ORF107	C10ORF10	BAT2L1	BCL6	ATP8A1	FAM13C	CYTH1	CAPZB	CROCC	C9ORF156	FAM78A	ERF	CD2	CDNF	CCDC88C	DUSP16	C2ORF40	BHLHE40	C9ORF50	CXCR4	HIST2H2BC	CD9	C14ORF4	CACNA1H	BACH1	CCDC69		KLF13	ZFP36L2	CCDC102A	C14ORF80	C17ORF49	C9ORF50	C14ORF43	C21ORF84	CD96	C14ORF4	BMP2	BAG5	CMTM7	LOC348761	COBL	CLYBL	LIPC	CXXC5	CENPN	CPLX2	C15ORF54
C15ORF52	C7ORF41	C1ORF198	C10ORF108	BCAR1	BHLHE41	B3GAT1	FAM53B	CYTIP	CARD8	CTDSPL	CAP1	FBXW7	ESYT2	CD28	CELF2	CCDC97	DYNLT1	C2ORF89	BIRC3	CAP1	CYFIP2	HIVEP2	CDC42EP2	C14ORF43	CACNB2	BANP	CCDC97		KLF16	ZMYND8	CCDC69	C16ORF54	C19ORF20	CA12	C15ORF48	C22ORF26	CD99	C14ORF43	BMP2K	BAHCC1	CROCC	LOC400958	CP	COL13A1	LOC100128023	CYB5B	CHMP1B	CREB3L2	C1ORF107
C15ORF54	C7ORF58	C1ORF210	C10ORF26	BCL2L1	BID	B3GNT7	FAM83D	DDIT3	CASP8	CYTIP	CAPZB	FGD3	ETS1	CD3D	CFLAR	CCND2	EGLN2	C3ORF67	BTG1	CAPZB	CYTH1	HMHA1	CDC42EP4	C21ORF33	CALD1	BAZ1A	CCND2		KLHL30	ZNF273	CCDC88C	C17ORF87	C1ORF151	CAMK2N1	C17ORF44	C2ORF82	CDK6	C15ORF52	BRP44	BCAR1	CXCR4	LOC727896	CPEB4	CORO1C	LOC100128675	CYP24A1	CITED4	CRIM1	C1ORF116
C19ORF61	C9ORF150	C20ORF112	C12ORF34	BEND6	BIN1	BAALC	FEZ1	DENND4A	CCDC12	DDX11	CARD8	FYB	EVI2A	CD44	CIC	CCND3	EGOT	C5ORF4	C10ORF105	CARD8	CYTIP	ICAM2	CDHR2	C3ORF26	CALM1	BCL11A	CCR6		LARP1		CCDC97	C1ORF192	C1ORF192	CAPN2	C18ORF1	C4ORF10	CDKN2A	C1ORF116	C10ORF54	BCL6	CXCR7	LOC730227	CREB3L2	COX4I2	LOC100131496	CYTH4	CPEB4	CST3	C1ORF201
C1ORF198	CABLES1	C20ORF117	C12ORF76	BIN1	BRD2	BAT2L1	FKBP5	DKFZP686I15217	CCDC135	DDX12	CASP8	FYN	EVL	CD53	CISH	CCNL1	ELF1	C5ORF56	C13ORF15	CASP8	DAD1	IER2	CDX1	C5ORF32	CALM2	BCL2A1	CCR7		LDB1		CCR7	C1ORF38	C1ORF200	CAPZB	C19ORF21	C6ORF132	CELF2	C1ORF130	C14ORF128	BHLHE40	CXXC5	LRCH1	CREB5	CPLX3	LOC100422737	DCBLD2	CREB3L1	CTNNBIP1	C21ORF84
C22ORF26	CACHD1	C20ORF29	C13ORF15	BRMS1L	C10ORF105	BBS2	FMNL2	DNAJB6	CCDC19	DKFZP686I15217	CCDC88C	GNG2	FAIM3	CD6	CLEC2D	CCR7	ELK3	C6ORF105	C14ORF181	CBFA2T3	DHRS12	IFITM1	CEBPD	C6ORF223	CAMK2G	BCL2L13	CD180		LDHD		CD2	C20ORF112	C1ORF59	CARM1	C19ORF61	C9ORF106	CHMP6	C20ORF112	C14ORF181	BIN1	CYFIP2	LRP2BP	CROCC	CUEDC1	LOC146880	DDIT4	CROCC	CTSB	C3ORF14
C2ORF61	CACYBP	C2ORF57	C14ORF181	C10ORF108	C10ORF108	BCAR1	FTH1	DOCK8	CCDC6	DNAJB6	CCND3	GPR183	FAM102A	CD69	CLK1	CD2	ELL	C6ORF225	C14ORF182	CCDC88C	DKFZP686I15217	IKZF1	CFLAR	C7ORF58	CAPZB	BCL3	CD22		LDLRAD3		CD247	C20ORF3	C1ORF93	CASZ1	C1ORF106	C9ORF50	CHRNA9	C3ORF23	C14ORF182	BOC	CYTIP	MALAT1	CSNK1E	CXXC5	LOC284751	DDR1	CRTC3	CXXC5	C3ORF65
C3ORF59	CALM1	C6ORF114	C14ORF23	C10ORF90	C10ORF26	BCL11A	GIT1	DUSP1	CCNI	DUSP1	CCNL1	GRAP2	FAM107B	CD79A	CMAH	CD247	ELOVL5	C9ORF156	C14ORF4	CCDC97	DLG4	IL16	CHST3	C8ORF40	CASZ1	BHLHE40	CD37		LGALS9		CD28	C21ORF33	C1QTNF9	CCDC12	C1ORF192	C9ORF69	CHST11	C3ORF32	C14ORF4	BRD4	DAD1	MAP3K5	CTDSP1	CYP2J2	LOC285419	DNASE2B	CSGALNACT1	CYP8B1	C3ORF67
C4ORF51	CAMK2D	C7ORF41	C14ORF4	C12ORF34	C10ORF54	BCL2L1	GNAI2	DUSP10	CCNY	DUSP10	CCNY	HIST1H2BD	FAM108A1	CD84	CORO1A	CD248	EML4	CACYBP	C14ORF43	CCND3	DNAJB1	IRF1	CLIP1	C9ORF50	CAV1	BICD2	CD40		LHFPL2		CD3G	C21ORF96	C20ORF3	CCDC162	C1ORF86	CABLES2	CHST2	C3ORF52	C14ORF43	BTD	DAPK1	MGAT5	CTDSP2	DACH1	LOC387647	DOT1L	CSNK1D	DAP3	C4ORF51
C5ORF13	CAPN2	C8ORF40	C14ORF43	C12ORF76	C11ORF59	BCL6	GPR56	DYRK1A	CD109	DYRK1A	CD164	HIST1H3E	FAM117A	CD8A	COTL1	CD28	EPHB6	CALM1	C18ORF1	CCNL1	DOCK8	IRF2BP2	CLTC	CACNA1S	CCDC107	BMF	CD44		LOC100272217		CD40LG	C2ORF46	C21ORF33	CCDC57	C20ORF112	CALM1	CLEC16A	C3ORF59	C15ORF52	C10ORF140	DDIT4	MGLL	CTNND2	DAP	LOC390858	DUSP4	CT62	DAPK1	C5ORF62
C5ORF39	CAPZB	C8ORF46	C16ORF62	C13ORF15	C11ORF9	BCL9L	GPRC5B	E2F3	CD164	EAPP	CD2	HIVEP2	FAM78A	CD97	CREB1	CD3D	EPM2AIP1	CAPZA1	C19ORF61	CCR7	DRD3	ISG20	CNST	CALM1	CCDC97	BRD4	CD47		LOC115110		CD44	C3ORF39	C21ORF91	CCDC85C	C21ORF125	CAMK2N1	CLINT1	C4ORF19	C17ORF44	C10ORF18	DDR1	MIR155	CTSC	DHRS12	LOC646329	DUSP5	CXCL2	DDIT4	C8ORF40
C6ORF105	CAST	C9ORF106	C16ORF88	C14ORF4	C11ORF94	BCLAF1	GSN	ELF1	CD34	EGFL7	CD247	HLA-C	FBXW7	CDC14A	CROCC	CD40LG	ETS1	CAPZB	C1ORF151	CD164	DUSP1	ITPKB	COL15A1	CALM2	CCND2	BTBD19	CD55		LOC282997		CD5	C6ORF114	C21ORF96	CD9	C21ORF33	CAPN2	CPNE5	C5ORF56	C17ORF76	C10ORF26	DDX11	MSC	CYP2S1	DIAPH3	LYST	DUSP6	CXCR4	DHRS2	C8ORF46
C6ORF35	CAT	C9ORF50	C18ORF1	C14ORF43	C12ORF34	BCR	HDAC5	ELMO1	CD53	ELF1	CD28	HSPA8	FGD3	CDC25B	CSK	CD44	EVL	CARD8	C1ORF200	CD2	DUSP2	JUNB	COL4A1	CAP2	CD44	BTN2A1	CD72		LOC541471		CD53	C6ORF129	C2ORF46	CDC42EP4	C21ORF84	CASZ1	CRADD	C6ORF132	C19ORF21	C10ORF71	DENND2D	MYO9B	DAZL	DPH3P1	MALAT1	EEF1A1	DAB2IP	DHRS3	C8ORF75
C7ORF69	CAV1	CABYR	C1ORF198	C14ORF49	C12ORF76	BHLHE41	HDAC7	EREG	CD69	ELMO1	CD40LG	IKZF1	FOS	CDC42EP3	CSRNP1	CD5	FAM102A	CASP8	C21ORF33	CD3D	DYNLT1	KCNA3	COL4A2	CAPN3	CD9	C10ORF105	CD74		LOC574538		CD6	C8ORF46	C2ORF89	CDCP1	C2ORF61	CBR3	CTCF	C6ORF222	C1ORF116	C13ORF33	DNAJC5B	NCOA3	DCAF17	EDN2	MALL	ELF3	DDB2	DIXDC1	C9ORF150
C8ORF46	CCNH	CALM1	C20ORF112	C16ORF88	C13ORF15	BID	HERPUD2	ERG	CD74	ENSA	CD44	IL10RA	FOXP1	CDC42SE2	CYTH1	CD53	FAM117A	CCDC12	C21ORF96	CD44	EEF2K	KDM6B	CORO1A	CAPNS1	CDC42EP4	C10ORF26	CD79A		LRRC33		CD7	C9ORF156	C3ORF39	CDH1	C5ORF32	CCDC57	CUX1	C6ORF223	C1ORF126	C14ORF179	DNMBP	NDUFV2	DDIT4	EFCAB4B	MAT2A	ELFN2	DDIT4	DNASE1L3	C9ORF3
C9ORF27	CD164	CAMK2G	C20ORF117	C17ORF28	C14ORF181	BIN1	HHATL	ERLIN2	CDC42	EPN1	CD53	IL16	FYB	CDNF	CYTIP	CD6	FAM53B	CCDC69	C2ORF46	CD69	EFHC1	KLF13	CPEB4	CAPZB	CDHR3	C11ORF75	CD79B		LY86-AS1		CD97	CA5B	C6ORF114	CDHR2	C6ORF132	CCDC85C	CYBB	C8ORF40	C1ORF130	C14ORF4	DUSP16	NR3C1	DENND5B	ELF3	MBNL2	ENO1	DDX47	DOCK4	CAB39
C9ORF44	CD180	CAMK2N1	C21ORF33	C18ORF1	C14ORF4	C10ORF108	HIP1R	ESYT2	CDC42SE2	ERG	CD6	IL32	GATSL3	CELF2	DAD1	CD69	FAM65B	CCDC88C	C2ORF89	CD84	ELOVL5	KLF2	CPXM2	CARM1	CDON	C13ORF18	CD82		LYL1		CDC14A	CALM1	C6ORF129	CDK11B	C6ORF222	CD164	CYFIP2	C9ORF106	C20ORF112	C14ORF43	EDEM1	ORAI2	DHCR7	ELFN2	MCART1	EPHA2	DENND3	DOK6	CALM2
C9ORF50	CD200	CAPN2	C22ORF26	C19ORF12	C14ORF43	C10ORF90	HLF	ETS2	CDK6	ERLIN2	CD69	INPP4A	GIMAP2	CFLAR	DDX3X	CD7	FGD3	CCDC97	C4ORF52	CD8A	EML4	KLF6	CREB3L2	CD36	CEBPD	C14ORF183	CD83		MALAT1		CDC42EP3	CARD11	C9ORF156	CDX2	C8ORF4	CD9	DAD1	C9ORF50	C21ORF84	C1ORF105	ELOVL5	PAX5	DHRS3	ERF	MESP2	EREG	DGKD	DUSP6	CALML3
C9ORF93	CD36	CAPN7	C22ORF9	C1ORF198	C14ORF49	C12ORF34	HSPA1B	ETV6	CELF1	ESYT2	CD82	IRF1	GIMAP8	CHST11	DDX5	CD97	FIGNL1	CCND2	C5ORF4	CD97	EPHB6	KLF9	CRIM1	CD59	CHMP4B	C14ORF43	CD97		MAPK13		CDC42SE2	CARD8	CALM1	CEBPA	C9ORF106	CDC20	DAOA	CALM1	C3ORF52	C1ORF144	ETS1	PCOTH	DHX15	EYA2	METTL11A	ERRFI1	DHRS7C	DUSP9	CAMK2N1
CALD1	CD44	CAPZB	C2ORF43	C1QTNF9B	C15ORF52	C12ORF76	HSPB1	EVI2B	CELF2	ETF1	CD84	IRF2BP2	GNG2	CIC	DENND2D	CDC14A	FLJ43663	CCNL1	C5ORF56	CDC14A	ESYT2	KRT73	CRISPLD2	CFLAR	CHST15	C14ORF49	CDC42EP3		MIR1205		CDC7	CASP8	CAP1	CFLAR	C9ORF50	CDC42EP4	DDIT4	CALML3	C4ORF19	C1ORF183	ETV6	PIK3R5	DISC1	FAIM2	MGAT4A	ESPNP	DKFZP686I15217	EEFSEC	CAPN2
CALM2	CDC42EP2	CCNL1	C2ORF82	C20ORF112	C16ORF62	C13ORF15	HTRA1	F2RL2	CFLAR	ETS2	CDC14A	ISG20	GPR132	CISH	DHRS12	CDC42	FMNL1	CCR7	C6ORF105	CDC42EP3	ETS1	LBH	CSNK1A1	CHRAC1	CHST3	C15ORF34	CDC42SE2		MIR142		CELF2	CCDC102A	CAPZA1	CGN	CA12	CDHR2	DEFA4	CAMK2D	C6ORF106	C1ORF198	EVL	PIK3R6	DISP1	FAM102A	MICALCL	EVI5L	DLGAP4	EGFLAM	CAST
CAMK2D	CDC42EP4	CCNY	C6ORF114	C20ORF117	C17ORF28	C14ORF23	IFFO2	FAM133B	CGGBP1	ETV6	CDC42EP3	ITGB1	GPR183	CMIP	DUSP1	CDC42SE2	FNBP1	CD2	C6ORF125	CDC42SE1	EVL	LCK	CTBP2	CLIC5	CMIP	C15ORF54	CDKN1A		MIR192		CFLAR	CCDC12	CAPZB	CHAC1	CALML3	CDKN1B	DENND2D	CAST	C6ORF132	C1ORF21	FAM102A	PIP4K2A	DKK1	FAM129B	MIR1204	F2RL1	DMD	EGFR	CAV2
CAPN2	CDH5	CD180	C7ORF41	C20ORF3	C18ORF1	C14ORF4	IFITM3	FAM63A	CHD9	EVL	CDC42SE2	ITGB2	GRAP2	COTL1	DUSP16	CEACAM21	FOXJ2	CD247	C9ORF156	CDC42SE2	EZR	LCP2	CTDSP2	CLIP1	COL15A1	C16ORF68	CEACAM21		MIR23A		CIC	CCDC69	CARD8	CHAD	CAMK2N1	CDX1	DGKA	CBX4	C6ORF222	C1QTNF2	FAM108B1	PLCG2	DLG2	FAM19A5	MIR1208	FAM129B	DOCK5	EHF	CCDC121
CASS4	CEBPD	CD9	C8ORF40	C21ORF33	C18ORF56	C14ORF43	IFNK	FAM65B	CHST11	F2RL2	CDK11A	ITK	HADH	CROCC	DUSP2	CELF2	FYB	CD3D	C9ORF50	CDK11B	FAIM3	LEF1	CTNND1	CMBL	COL4A2	C18ORF1	CELF2		MIR33B		CMAH	CCDC88C	CASP8	CHKA	CAPN2	CDX2	DNAJC5B	CCDC85C	C8ORF4	C20ORF135	FAM53B	PLEK	DNMT3B	FAM83F	MIR1293	FASN	DTWD1	ELF1	CD180
CAV1	CELF1	CDC42EP1	C8ORF46	C21ORF56	C19ORF12	C14ORF49	IL6R	FAR2	CISD2	FAM133B	CDKN2C	ITPKB	HDAC7	CSK	ECE1	CLEC2D	FYN	CD40LG	CALM1	CDNF	FAM117A	LEPROTL1	CUEDC1	CNBP	COL5A1	C18ORF8	CFLAR		MMP23A		CMTM7	CCDC97	CBLB	CHMP4B	CAPZB	CEBPA	DNTT	CCND2	C8ORF40	C20ORF29	FAM65B	PLEKHO1	DPPA4	FAM83G	MIR2278	FAT1	DUSP1	ELOVL2	CD44
CCDC121	CHD9	CDC42EP2	C9ORF50	C22ORF26	C19ORF29	C16ORF62	INF2	FBXW4P1	CLEC2B	FAR2	CDNF	KBTBD2	HECA	CST7	EEF1A1	CLK1	GALM	CD44	CAMK4	CELF2	FAM159A	LITAF	DAB2	COL4A2	COL6A1	C1ORF200	CIITA		MRM1		CORO1A	CCL3	CCDC12	CHST5	CARD10	CEBPG	DPP4	CCNL1	C9ORF106	C21ORF33	FBXW7	PMAIP1	DPYSL2	FCN2	MIR3150B	FLJ32224	DUSP5	ENTPD5	CD59
CCDC127	CIDEA	CDCA7L	CABYR	C22ORF9	C1ORF198	C16ORF88	IQSEC1	FLJ35776	CLIC1	FGFR1OP2	CEP57	KLF13	HIVEP2	CXCR4	EEF2K	CMTM7	GATSL3	CD47	CAPN2	CEP57	FAM190B	LOC100130581	DAD1	COLQ	COL6A2	C1ORF38	CLCN4		MTFP1		COTL1	CCL5	CCDC69	CIB1	CARM1	CFL1	DTX1	CD164	C9ORF50	C3ORF21	FKBP5	POU5F1B	DPYSL3	FLJ45079	MIR365-2	FLJ35776	EED	ERBB2	CD9
CCDC34	CIDEC	CDK18	CAPN2	C2ORF52	C20ORF112	C17ORF108	IRF2BP2	FOSB	CLK1	FOXP1	CFLAR	KLF2	HSPC157	CXORF65	EGOT	CNOT6L	GNA13	CD5	CAPZB	CFLAR	FAM65B	LOC100289230	DDR2	CORO1C	COL6A3	C20ORF197	CLCN6		MTSS1		CSK	CCND2	CCDC88C	CLMN	CAST	CHKA	DUSP6	CD58	CACNA1D	C3ORF74	FLJ42393	PPCDC	DTNA	FRMD3	MIR4315-1	FLJ43663	EHD1	ERMP1	CDC42BPG
CCDC80	CISH	CES4A	CAPZB	C6ORF145	C20ORF117	C17ORF28	ITGB4	FOXP1	CLTC	GNA15	CHRNA9	KLF6	ICAM2	CYFIP2	EHD1	CORO1A	GNAI2	CD53	CARD8	CHST11	FGD3	LOC100507217	DHRS3	CORO6	CPXM2	C20ORF29	CLEC17A		NCRNA00152		CST7	CCR6	CCDC97	CLTB	CASZ1	CIRBP	EDEM1	CD82	CALM1	C4ORF52	FMN1	PREX1	EEF1A1	GLCE	MSI2	FOSB	ELF3	ETS2	CDCP1
CCDC97	CLEC3B	CHGA	CCDC88C	C7ORF41	C21ORF33	C18ORF1	ITPK1-AS1	GATA2	CMAH	GNN	CHST11	LAPTM5	IER2	CYTIP	EHD4	CRBN	GNG2	CD82	CASP8	CISH	FLJ43663	LOC282997	DIRC3	CPEB4	CRADD	C22ORF9	CLEC2D		NFIA		CXCR4	CCR7	CCL5	CMIP	CBLN3	CISH	EDN2	CD9	CAMK2D	C6ORF223	FYB	PTEN	EFNA5	GPHN	MYC	GAMT	ENO1	FABP1	CDH13
CCL2	CMIP	CHN2	CCNY	C8ORF40	C21ORF45	C1ORF107	ITPKB	GLIPR2	CMIP	GOLGA5	CISH	LCP1	IKZF1	DAD1	EIF1	CREB1	GPBP1	CD97	CCDC102A	CLEC2D	FMNL1	LOC374443	DLC1	CROCC	CRISPLD2	C2ORF58	CLECL1		NOX5		CXORF65	CD164	CCND3	CORO1A	CBR3	CLCN2	EGLN3	CDC42EP2	CAMK2N1	C6ORF94	GALNT2	PTK2B	EGFEM1P	GRM4	MYEOV	GAPDH	EPAS1	FBXO25	CDH3
CD44	CNBP	CHRAC1	CD81	C8ORF46	C21ORF56	C1ORF183	JUNB	GNA15	CNBP	GPBP1	CLCN3	LIMD2	IL6R	DEF6	ELF1	CROCC	GPR174	CDC14A	CCDC64	CLIC1	FOSB	LOC439949	DPYSL2	CRY2	CRY2	C3AR1	CLLU1OS		NUP210		CYFIP2	CD2	CCNL1	CPT1A	CCDC12	CLDN3	EGOT	CDH1	CAND1	C7ORF58	GFI1	PTP4A2	EIF6	GSG1L	MYOF	GLIS2	EPB41L1	FLJ10038	CDK16
CD59	COBLL1	CHST3	CD82	C9ORF3	C22ORF9	C1ORF198	KIAA0556	GNAQ	CNST	GPR21	CLEC2D	LOC100130581	ISG20	DNAJB1	ELOVL5	CRTC3	GPR183	CDC42	CCDC69	CMIP	FYB	LOC541471	DUSP1	CSDA	CSPG4	C5ORF4	CMTM7		PBX2		CYTH1	CD247	CCR7	CREB3L1	CCDC48	CLDN7	EIF3IP1	CDH17	CAPZB	C9ORF106	GNB1L	RAC2	ELF2	GYLTL1B	NACAP1	GNAI2	EPHA2	FLJ35776	CDK6
CDC42EP3	COL15A1	CINP	CD9	C9ORF50	C2ORF57	C1ORF212	KLF13	GOLGA5	COMMD3	GPX1	CLIC1	LOC100216545	ITPKB	DTHD1	EMD	CSK	GPR68	CDC42SE2	CCDC88C	CNST	GIMAP2	LOC644246	DUSP10	CSDE1	CSRP1	C5ORF62	COL19A1		PDIK1L		CYTIP	CD300A	CD2	CRYBB3	CCDC57	CMIP	ELF1	CDHR2	CARD10	C9ORF170	GOLGA3	RAD51L1	ELMO1	HDAC2	NARS2	GPR132	ERRFI1	FLJ42709	CDKN1B
CDH13	COL4A2	CLDN11	CDC42EP1	CABYR	C6ORF145	C20ORF112	KLF6	GPBP1	COMT	H2AFY	CMAH	LOC100507217	JUNB	DUSP1	EML4	CXCR4	GPRIN3	CELF2	CCDC97	COMT	GIMAP8	LOC645158	DYRK2	CSRNP1	CUEDC1	C6ORF114	COQ2		PDZD8		DAD1	CD3D	CD247	CSNK1D	CCDC85C	COBL	ELOVL5	CDRT1	CAST	C9ORF3	GRAP2	RCSD1	EPCAM	HPCAL1	NCEH1	GPRC5A	ETS2	FLRT3	CDKN2B
CDK17	CORO1A	CLIC4	CDC42EP4	CADM4	C7ORF41	C20ORF117	KLF9	GPR21	CORO1C	HAAO	CMPK1	LOC150622	KIAA0748	DUSP16	EMP3	CYTH1	GRAP2	CHD1	CCL20	CORO1A	GPR132	LOC653513	ECE1	CSRP1	CUX1	C6ORF223	CORO6		PER1		DENND2D	CD44	CD248	CSRNP1	CCND1	CORO1A	EMB	CDX1	CBX4	CALM1	GRB7	RHOH	EPHA7	HS1BP3	NCRNA00111	GPRC5C	F3	FMNL2	CEBPG
CDK6	CORO1C	CLMN	CDCA7L	CALM1	C8ORF40	C20ORF3	LOC148696	GPX1	CPSF7	HEMGN	CMTM7	LOC541471	KLF13	DUSP2	ESYT2	CYTIP	GRB7	CHMP6	CCND2	CSK	GRAP2	LOC727896	EFNA1	CSRP3	CXXC5	C9ORF106	COTL1		PGAP3		DHRS12	CD48	CD3D	CTBP2	CCND2	CPEB2	EPHB6	CDX2	CCDC12	CALM2	HADH	RNF216	ERBB2	HUS1	NCRNA00184	H1F0	FAM102A	FNIP2	CFLAR
CDKN2B	CORO6	CLSTN1	CDH1	CAMK2N1	C8ORF46	C21ORF33	LOC283999	GSG1	CTDSPL	HIPK1	CNST	LOC644246	KLF2	ECE1	ETS1	DDX3X	HDAC7	CHST11	CCND3	CST7	H3F3B	LOC730227	EGOT	CTBP2	DAAM1	C9ORF47	CREB1		PICALM		DNAJB1	CD53	CD44	CTDSP2	CD247	CPT1A	EPS8L3	CENPV	CCDC85C	CAPZB	HBS1L	RUNX3	EYS	ID4	NRIP1	HMGA1	FAM108C1	FOXQ1	CHML
CEP63	CPA1	CNP	CDH11	CAPN2	C9ORF106	C21ORF56	LOC285796	GUCY1A3	CUX1	HNRNPU	CRBN	LOC646329	KLF6	EEF2K	EVL	DDX6	HECA	CMTM7	CCR6	CTDSP1	HEATR2	LRRFIP1	EIF1	CTDSP2	DAB2IP	C9ORF71	CRELD2		PIM1		DOCK8	CD58	CD48	CTNND1	CD9	CRIP1	ETS1	CERK	CCND2	CASP9	HDAC7	S1PR1	FABP6	IGSF21	NSUN7	HMGA2	FAM129B	FRAS1	CHRNA9
CFLAR	CPM	CNTN2	CDS2	CAPN3	C9ORF3	C22ORF26	LOC386597	H2AFY	CXXC5	HSPA8	CSK	LOC653513	KRTAP11-1	EHD1	FAM108A1	DEF6	HIPK1	CNOT6L	CCR7	CXORF65	HIPK1	LSR	ELF3	CTSB	DAPK1	C9ORF72	CSK		PISD		DTHD1	CD69	CD5	CUEDC1	CD97	CRK	ETS2	CFLAR	CCNG2	CASZ1	HDHD1	2015-09-09	FAM122A	INSM1	OSMR	HNRNPF	FAM45A	FRAT2	CHSY3
CHMP1B	CREB1	COBL	CELF2	CAPZB	C9ORF50	C22ORF9	LOC400238	HAAO	CYTIP	ICAM2	CXXC5	LOC727896	LAPTM5	EIF3A	FAM117A	DENND2D	HIVEP2	CPNE1	CD2	CYTH1	HIST1H2AC	MAPRE2	ELK3	CUEDC1	DDIT4	CAMKK2	CSNK1D		PLCG2		DUSP1	CD74	CD53	CXXC5	CDC20	CROCC	ETV6	CGN	CCRL2	CBR4	HIPK1	SH3KBP1	FAM134B	IP6K3	PADI1	HOXB8	FAM65C	FRY	CITED4
CHRNA1	CREB3L2	CORO1C	CFLAR	CASKIN2	CABYR	C2ORF43	LOC645323	HDAC7	DAPK1	IDS	CYFIP2	LRRFIP1	LEF1	ELOVL5	FAM53B	DGKZ	HNRNPA2B1	CRBN	CD247	CYTIP	HIVEP2	MCL1	ELL	CUX1	DDR2	CAP1	CTCF		PLEKHH3		DUSP16	CD97	CD6	CYB5R2	CDC25B	CSRNP1	EVL	CHKA	CD164	CCDC114	HIST1H4B	SLAMF1	FAM172A	IRF2BP2	PBX1	HS3ST1	FLJ31485	FUNDC2P2	CLDN1
CHSY1	CRIM1	CORO2B	CHD4	CBR1	CALM1	C2ORF55	LOC646329	HIPK1	DCAF8	IKZF1	CYTH1	LTB	LEPROTL1	EML4	FAM78A	DHRS12	HNRNPF	CREM	CD274	DAD1	HLA-B	MDM4	ERF	CXXC5	DES	CAPG	CXCR4		PRKAB1		DUSP2	CDC42	CD69	DAB2IP	CDC42EP4	CSTB	FAIM3	CHMP4B	CD58	CCDC12	HIVEP3	SLAMF7	FAM46B	KCND3	PDE4B	HSPB1	FLJ32224	FUT9	CLIP4
CIC	CSF1	CORO6	CHRAC1	CCNY	CAMK2G	C2ORF57	LOC653513	HIST1H2AK	DDIT4	INO80D	CYTIP	MALAT1	LOC100128542	EMP3	FGD3	DHRS13	HNRNPL	CRTC3	CD28	DDIT3	HNRNPF	MED15	ERGIC1	CYP2J2	DHRS3	CAPZA1	CXCR5		PTMA		ECE1	CDC42EP3	CD7	DAGLA	CDCP1	CTBP1	FAM117A	CLIC5	CD9	CCDC34	HK1	SLC15A4	FAM60A	KCNJ3	PDP1	ID1	FLJ35776	FZD4	CMIP
CITED2	CSNK1A1	CP110	CHST3	CD74	CAMK2N1	C6ORF114	LOC730227	HNRNPU	DDX17	INPP5D	DAD1	MBNL1	LOC100216545	EPHA4	FLJ43663	DUSP1	HSPA8	CSNK1A1	CD3E	DDIT4	ICAM2	MGAT4A	ERRFI1	DAG1	DIXDC1	CAPZB	CXXC5		RBM38		EEF1A1	CDC42SE2	CD74	DAPK2	CDH1	CTBP2	FAM176A	CLRN3	CDC25B	CCDC8	HMGB2	SMAD3	FAM65B	KCNJ6	PFKFB3	IER2	FLJ39051	GANC	CMTM7
CLIP4	CTNND1	CPEB4	CINP	CD82	CAPN2	C6ORF186	LRP1	HTR1F	DDX5	IRF2BP2	DDIT4	MDM4	LOC100507217	EPHB6	FLT3LG	ECE1	ICAM2	CTSB	CD40LG	DEDD2	IER2	MIR1206	ESYT2	DDI2	DLC1	CARS2	CYBASC3		RHCE		EEF2K	CDC7	CD81	DDIT4	CDHR2	CTDP1	FAM53B	CMIP	CDC42EP2	CCDC88C	HSPA8	SMG6	FAM86DP	KCNQ2	PHLDA3	IER5L	FLJ43663	GAS2	CNTN3
COL18A1	CTSB	CPNE2	CLDN11	CD9	CAPZB	C7ORF41	LRWD1	ICAM2	DENND4A	ITGA4	DENND2D	MIR1284	LOC282997	ESYT2	FMNL1	EGLN2	IFFO2	CYLD	CD44	DENND2D	IKZF1	MIR1284	ETS1	DDIT4	DLG5	CASP8	CYFIP2		RHD		EGLN2	CDK5R1	CD84	DDR1	CDK11B	CTDSP1	FAM69A	COBL	CDH1	CCDC97	IFNAR1	SNORA14B	FBXW4P1	KCNQ3	PIK3R1	IRF2BP2	FLNB	GATA4	CORO1C
COL1A1	CXCR7	CREB5	CLIC4	CDC42BPB	CASKIN2	C7ORF54	LZTS2	IDS	DLEU1	ITGA5	DENND4A	MIR3128	LOC401242	ETS1	FNBP1	ELF1	IFITM1	CYTH1	CD47	DENND4A	IL16	MIR1301	ETS2	DGCR6	DPYSL3	CAST	CYP11A1		RIC3		EHD1	CEACAM21	CD8A	DENND3	CDK3	CTSB	FAM9C	CORO2A	CDH17	CCND1	IKZF1	SORL1	FEZF1	KIAA1383	PLXNA2	IRS1	FLYWCH1	GGT1	CRIM1
COL1A2	CYB5A	CROCC	CLMN	CDC42EP1	CCDC85C	C8ORF40	MACF1	IER2	DNAJC9	ITPR1	DHRS12	MIR548C	LOC439949	EVL	FOS	ELOVL5	IKZF1	CYTIP	CD48	DNAJB1	INSIG1	MIR142	ETV6	DGKD	DSTN	CAT	CYTH1		RIN3		EHD4	CELF2	CD96	DMAP1	CDX1	CUEDC1	FBXW7	CPEB4	CDHR2	CD34	IL32	SPERT	FGF2	KLF13	PMEPA1	ITGA3	FNDC3B	GK	CSDA
COL4A2	DAAM1	CRTC3	CLU	CDCA7L	CCDC97	C8ORF46	MALAT1	IKZF1	DUSP1	JARID2	DIAPH1	MIR623	LOC541471	EZR	FOSB	EML4	IL10RA	DAD1	CD5	DNAJC9	IRF1	MIR3188	FAM102A	DHRS3	DUSP1	CCDC117	CYTIP		RREB1		ELL	CFLAR	CD97	DNAJB1	CDX2	CXXC5	FGR	CREB3L1	CDKN1A	CD44	IRF1	SPTBN1	FGFBP3	KLHDC5	PPAP2B	ITGB4	FOS	GLDN	CT62
COL5A1	DAB2	CRYAB	CNDP1	CDH1	CCNY	C9ORF106	MAP4K4	INO80D	DUSP10	JMJD1C	DNAJC9	NCK2	LOC648987	F2RL2	FOXJ2	EMP3	IL16	DDX6	CD58	DOCK8	IRF2BP2	MIR548Z	FAM129B	DIRC3	DUSP10	CCDC19	DAD1		RSAD2		ELOVL5	CHCHD3	CDC14A	DSP	CEBPA	DAB2IP	FLI1	CREB3L2	CDKN2AIPNL	CD81	IRF2BP2	ST6GAL1	FGFR1	KLHL29	PRICKLE1	ITPRIPL2	FOSL2	GLRX5	CTBP2
COL6A2	DAPK2	CSRP1	CNTN2	CDH11	CD82	C9ORF3	MAP7D1	INPP5D	DYRK1A	JUNB	DUSP16	NCRNA00152	LOC653513	FAM113B	FYN	EPHB6	IL7R	DEF6	CD6	DOM3Z	ISG20	MNT	FAM53B	DKFZP451B082	ECE1	CCDC69	DDX6		SAP30L		EML4	CIC	CDC42	DUOX2	CERK	DAGLA	FLJ35776	CRKL	CDRT1	CD9	ITGA4	SUMO1P1	FLJ35776	KRT80	PRICKLE2	JUNB	FST	GLS	CTNND1
COL6A3	DDR2	CTDSP2	COBL	CDH20	CD9	C9ORF50	MBP	IRF2BP2	E2F3	KIAA0748	ECE1	NDUFV2	LOC728554	FAM117A	GATA3	ESYT2	INPP4A	DENND2D	CD69	DRD3	ITK	MPP7	FEM1B	DLEU2	EFNB2	CCDC88C	DENND4A		SERPINH1		EMP3	CISH	CDC42EP3	DUSP27	CHD9	DEGS2	FLJ42289	CSNK1E	CDX1	CDC42EP2	ITGAE	TEC	FLJ40434	LGALS3	PTPN1	KCNN4	FTH1	GLUL	CTSC
COL8A1	DENND2D	CTDSPL	CORO2B	CDK18	CDC25B	CABLES1	MCF2L	ITGA4	EAPP	KIAA1267	EED	NEAT1	LPIN2	FAM179A	GGPS1	ETS1	INPP5D	DGKA	CD7	DUSP2	ITPKB	MTIF3	FGD4	DLGAP4	EGFR	CCNL1	DGKD		SH3GL1		ESYT2	CLEC2D	CDC42SE1	EFHD2	CHKA	DENND3	FLJ42969	CSRP1	CDX2	CDC42EP4	KCNA2	TFEB	FLT1	LGR6	RAD51L1	KIAA1522	GALNT2	GLYCTK	CXCL2
COPS8	DHRS12	CTRL	CORO6	CDK19	CDC42BPB	CACYBP	MCFD2	ITGA5	EED	KLF6	EEF2K	NR4A2	LPXN	FAM190B	GPR132	EVL	IQSEC1	DGUOK	CD82	EDEM1	ITPRIP	MYH9	FHL1	DPYSL2	EHD1	CCNY	DOCK10		SLC25A37		ETS1	CLIC1	CDC42SE2	EFNA1	CHST5	DGAT1	FLJ43663	CTBP2	CEBPA	CDH5	KCNH8	TMSB4X	FOXN3	LMO2	RAI1	KIAA2013	GATA2	GNAQ	CYP24A1
CORO1C	DHRS3	CTTNBP2	CORO7	CDK5R1	CDC42EP1	CADM4	MEF2D	ITPR1	ELF1	LAPTM4A	EGOT	OR4N3P	LRRFIP1	FAM53B	GPR174	FAIM3	IRF2BP2	DHRS12	CD84	EED	JUNB	MYL12A	FHL3	DST	EML1	CCR1	DTX1		SLC48A1		EVL	CLLU1	CDC7	EFNB1	CISD3	DGCR2	FLJ44511	CUEDC1	CENPV	CDK8	KIAA0182	TNFAIP8	FOXO1	LOC100133985	RAI14	KITLG	GATSL3	GNPAT	CYTH3
CPA1	DLC1	CUEDC1	CPEB2	CDS2	CDC42EP2	CALM1	MGAT3	JARID2	ELK3	LCP2	ELF1	PCBP1	LSR	FAM65B	GPR183	FAM107B	ISG20	DLEU2	CD96	EEF1A1	KBTBD2	NCK2	FKBP5	DUSP1	ERGIC1	CD101	DUSP2		SLC4A1		EZR	CMAH	CDK5R1	EIF1	CISH	DGUOK	FLJ46257	CXXC4	CERK	CEBPD	KIAA0247	TNFRSF13B	FRAS1	LOC100287284	RANBP3L	KRR1	GDA	GOLIM4	DAB2IP
CREB3L1	DPYSL2	CXXC5	CPEB4	CERCAM	CDC42EP4	CAMK2A	MGC16025	JMJD1C	ELMO1	LDHD	ELOVL5	PIP4K2A	MALAT1	FAM78A	GPR68	FAM63A	ISY1	DNMT3A	CD97	EEF2K	KDM6B	NCRNA00152	FLJ13197	DUSP10	ERRFI1	CD300C	DUSP22		SLC7A5P1		FAIM3	CMIP	CELF2	ELF3	CLCN2	DKFZP434I0714	FMNL1	CXXC5	CFLAR	CECR1	KIF14	TNIK	FZD7	LOC100310782	RARRES1	KRT80	GDF15	GPAM	DCBLD2
CREB3L2	DUSP1	CYTH1	CPNE2	CES4A	CDCA7L	CAMK2G	MGLL	JUNB	ELOVL5	LEPROTL1	EMB	PPP2R5C	MAPRE2	FAM83D	GPR88	FAM65B	ITGB1	DOCK10	CD99	EGLN2	KLF13	NEAT1	FLJ21408	DUSP27	ESYT2	CD300E	E2F5		SREBF1		FAM113B	CMKLR1	CFLAR	ELL	CLDN7	DNAJB6	FRMD4B	CYP3A7	CGN	CELF2	KLF13	TNIP1	GABRB3	LOC100499467	RASL11B	LAMA5	GLRX	GPBP1L1	DDIT4
CRIM1	DUSP14	DAAM2	CREB5	CFL2	CDH1	CAMK2N1	MIR1301	KDM6A	ENO1	LMO2	EML4	PRKCH	MBNL1	FCGR3A	GPRIN3	FAM78A	ITGB2	DOCK8	CDC14A	EHD1	KLF2	OR4N3P	FLNB	DYRK1A	ETV6	CD302	ECE1		ST3GAL2		FAM117A	CN5H6.4	CHD4	EPB41L1	CLIP2	DSP	FTO	CYP4V2	CGNL1	CFLAR	LAPTM5	TPD52	GALNT13	LOC149950	RBBP8	LDB1	GNAI2	GPC3	DDR1
CROCC	DUSP6	DDIT4	CROCC	CHADL	CDK18	CAPN2	MIR219-2	KIAA0125	ENSA	LOC100129716	ENSA	PRPF38B	MCL1	FCGR3B	GRAP2	FAM89B	ITK	DOCK9	CDC25B	EIF1	KLF6	OXNAD1	FNBP1	DYRK1B	FAM101A	CD44	EDEM1		STAT5A		FAM53B	CORO1A	CHST11	EPB41L4B	CLMN	DUSP1	FTSJD1	DAB2	CHKA	CHD4	LASS6	TRAF1	GEMIN8P4	LOC151162	RCSD1	LIF	GRAMD1B	GPR126	DDX42
CRYBB1	DUT	DDO	CRTC3	CHD7	CDS2	CAPZB	MIR2278	KIAA0182	EPGN	LOC100130581	EPB41	PSTPIP1	MDM4	FGD3	HDAC7	FGD3	ITPKB	DUSP16	CDC42	ELL	KLF9	PCBP1	FNDC3B	DYRK2	FAM102A	CD58	EEF2K		STK11		FAM65B	CREM	CIRBP	EPCAM	CLN3	DUSP6	FUT8	DDX52	CHMP4B	CHD9	LAT	TRAF3	GFPT2	LOC221122	RDH10	LMNA	H2AFJ	GRB7	DDX47
CSNK1A1	EBF1	DDR1	CSF1	CHMP6	CELSR2	CCNY	MIR23B	KIAA0247	EREG	LOC100216545	EPC1	PTGES3	MGAT4A	FLJ35776	HIVEP2	FIGNL1	KCNN4	DYNLT1	CDC42EP3	ELOVL5	KLRAP1	PIK3IP1	FOS	EEF2K	FAM129B	CD74	EGR3		TAL1		FAM78A	CROCC	CLEC2D	EPHA2	CLTB	DUSP8	FXYD2	DHRS3	CLDN3	CHST3	LBH	UGCG	GLI2	LOC282997	RHOBTB3	LOC100131496	HDAC7	GREB1	DDX59
CSNK1E	EBF3	DEPDC6	CSK	CHN2	CES4A	CD180	MIR29B1	KIF2C	ERG	LOC100499183	EPHB6	PTPRC	MIR1206	FLJ43663	HMHA1	FLJ13197	KIAA0748	DYRK1A	CDC42SE2	EMP3	KLRK1	PIM2	FOSL2	EFCAB2	FAM188B	CD86	EHD1		TET3		FAM83D	CRTC2	CMTM7	EPN1	CMIP	DYNC1H1	FYB	DNASE1	CLLU1	CHSY1	LCP1	USP3	GLTSCR1	LOC284648	RHPN2	LOC100133985	HEXIM2	GSN	DFNA5
CSRNP1	ECE1	DGCR6	CSRNP1	CHRAC1	CH25H	CD74	MIR3165	KLF6	ERGIC1	LOC541471	ESYT1	RALGDS	MIR1260B	FMNL1	HNRNPA2B1	FLJ21408	KIAA0922	EDEM1	CDHR2	EPHB6	LAPTM5	PIP4K2A	FSTL1	EGFLAM	FAM82A1	CD97	EIF2AK3		TIMP3		FGD3	CSK	CNBP	EPS8L3	CNNM4	DYRK2	FYCO1	DSC2	CLRN3	CKM	LCP2	VOPP1	GNA12	LOC284751	RUNX1	LOC100499467	HIF1A	GSTO1	DIP2B
CSRP1	EED	DIXDC1	CSRP1	CHRM5	CHKA	CD81	MIR3183	LAPTM5	ERGIC2	LOC648987	ESYT2	RASA3	MIR23A	FNBP1	HNRNPF	FOXP1	KLF13	EGOT	CDNF	EPM2AIP1	LBH	PLCG1	FTH1	EGFR	FBXO32	CDC42	ELF1		TM9SF3		FLI1	CX3CR1	CNOT6L	ERBB3	CORO1A	EAPP	GAB3	DSP	CMIP	CLEC3B	LDHD	WIPF1	GNAS	LOC400238	S100A10	LOC283335	HMGN4	HECTD1	DLX2
CTLA4	EEPD1	DKFZP451B082	CTDSP2	CHST3	CHMP6	CD82	MIR3188	LCP1	ERLIN1	LPXN	ETS1	RBM39	MIR4316	FOSB	ICAM2	FYB	KLF6	EGR2	CEACAM21	ERF	LCP1	PPP2R5C	GAPDH	ELL	FEM1B	CDC42SE2	ELOVL5		TMEM53		FLJ27354	CXCR4	CORO1A	ERCC3	CPNE2	EFHD2	GALNT2	DTX4	CNKSR3	CLLU1	LETM1	ZBTB38	GPR176	LOC400548	S100A11	LOC284751	HRH1	HEPACAM	DNAJC5B
CXXC5	EFEMP1	DKK3	CTNND2	CIC	CHRAC1	CD9	MIR3935	LEPROTL1	ESYT2	LRCH1	EZR	RHOG	MIR548Z	FOSL2	IER2	FYN	LAPTM5	EHD4	CELF2	ETS1	LCP2	PRKAR1B	GATA6	ENDOD1	FERMT2	CDKN1A	EML4		TNS3		FLJ32224	CXCR5	COX18	ERGIC1	CPT1A	EFNA1	GALNT6	DUSP16	COPS8	COL12A1	LOC100129345	ZNF217	GPR31	LOC400927	SDC1	LOC338799	ID3	HEXIM2	DNMBP
CYP24A1	EGFR	DNAJB12	CTTNBP2	CLDN11	CHRNA7	CDC42EP1	MIR575	LMO2	ETS2	LRRC33	F2RL2	RHOH	MIR623	FYB	IFITM1	GIMAP5	LBH	EIF2C2	CERK	EVL	LEPROTL1	PRKCH	GCLC	ERGIC1	FGF7	CDNF	EMP3		TSPAN14		FOS	CXORF65	CPNE1	ETS2	CREB3L1	EFNA3	GALNT7	DUSP6	CORO2A	COL15A1	LOC100188949		GPR98	LOC648987	SDC4	LOC399959	IER2	HHEX	DOCK5
CYR61	EGLN2	DNAJB2	CUEDC1	CLIC4	CHST3	CDC42SE2	MIR638	LOC100130581	ETV6	LRRC70	FAIM3	RNF149	MYH9	FYCO1	IKZF1	GIMAP8	LCP1	EIF2S2	CFLAR	EZR	LIMD2	PTMA	GCNT2	ESCO1	FGFR1	CEBPA	ENTPD1		UBAC1		FOSB	CXXC5	CRBN	EXT1	CRIP3	EFNB1	GAS7	EDN1	CPEB4	COL16A1	LOC148189		GPRC5B	LPAR5	SEMA3F	LOC400931	IER3	HIST1H2AA	DSE
DAB2	EHD4	DNAJC6	CXORF26	CLIP2	CIC	CDCA7L	MKNK2	LOC100131434	EVI2B	LRRFIP1	FAM100B	RORA	NCK2	GATA3	IL16	GNG2	LCP2	ELF1	CHMP6	FAM100B	LITAF	PTPN6	GJC1	ETS1	FHL1	CEBPD	EPM2AIP1		USP20		FRMD4A	CYFIP2	CREB1	EZR	CROCC	EIF1	GATA3	EEF1A1	CPS1	COL1A2	LOC282997		GRID2	LRP8	SH3TC2	LOC400960	IER5	HIST1H2AK	DSG1
DAP	ELK3	DOCK1	CXXC5	CLMN	CINP	CDH11	MPRIP	LOC100499183	EWSR1	LYN	FAM113B	RUNX3	NCRNA00152	GMEB2	IL32	GPBP1	LOC100129387	ELK3	CISH	FAM108A1	LOC100129387	PVRIG	GLIPR2	ETS2	FILIP1L	CELF1	ERF		WDR1		FYB	CYTH1	CROCC	FABP1	CSNK1D	EIF2C2	GATSL3	EGFR	CPT1A	COL4A2	LOC283999		GRPR	LRRC4	SHB	LOC554202	IL24	HIST1H2BC	DSG3
DCBLD2	ELOVL5	DPYSL2	CYTH1	CNDP1	CLASRP	CDK18	MRAS	LOC400927	F2RL2	MACF1	FAM118A	SEMA4D	NDFIP1	GNG2	INPP4A	GPR132	LOC100216545	ELOVL5	CLEC2D	FAM117A	LOC100130581	RALGDS	GLOD4	ETV6	FKBP5	CELF2	ERGIC1		WDSUB1		FYCO1	CYTIP	CRTAM	FAM100B	CSNK1E	EIF4EBP2	GBP5	EGOT	CREB3L2	COL5A1	LOC389705		GSG1	LRRC55	SLC2A12	LOC646329	IQGAP1	HIST1H3D	DSP
DDAH1	EML4	DSCAML1	DAAM2	CNP	CLDN11	CDK5R1	MTSS1L	LOC541471	FAM49A	MALAT1	FAM172B	2015-09-09	NEAT1	GPBP1	IQSEC1	GPR174	LOC100507217	EML4	CMAH	FAM118A	LOC100133985	RARA	GLTSCR1	FAM101A	FLJ13197	CFLAR	ETS1		ZDHHC19		FYN	DAD1	CRTC2	FAM108C1	CSRNP1	EIF6	GFI1	EIF6	CREB3L3	COL5A2	LOC541471		GTF2E2	LRTM2	SMAD3	LOC730668	IRF2BP2	HMMR	DST
DDX47	EMP1	DUSP7	DAB2IP	CNTN2	CLIC4	CDK5RAP2	MYBPHL	LOC648987	FAM63A	MAPK1	FAM21A	SH3BGRL3	NR4A2	GPR132	IRF1	GPR68	LOC148696	ENO1	CORO1A	FAM38A	LOC100289230	RASA3	GNA13	FAM134B	FLNB	CHMP4B	EVI2A		ZEB2		GALM	DDIT3	CSK	FAM129B	CSTB	ELF3	GIMAP2	ELF1	CRKL	COL6A1	LOC729177		GTF2I	LTBP2	SNORA14B	LPHN1	ISG20	HNRNPA2B1	DSTN
DGKI	ENG	DYNLRB1	DBN1	COBL	CLIP2	CDS2	MYH9	LPXN	FBXW4P1	MAPK14	FAM46C	SIPA1	OSTCL	GPR174	IRF2BP2	GRAP	LOC401093	EPC1	COTL1	FAM46C	LOC148696	RASSF5	GNAI2	FAM189A2	FNBP1	CHSY1	EZR		ZFP36L2		GATSL3	DDIT4	CX3CR1	FAM134B	CTBP2	EMD	GLRX	ENC1	CROCC	COL6A2	LOC730227		GULP1	LY86-AS1	SNORA80	LRFN4	ITGB1	HNRNPA3	DUSP1
DKFZP566F0947	ENPP2	DYSF	DBP	CORO2B	CLMN	CELF2	MYO18A	LRBA	FCGR3A	MAPK8	FAM53B	SLAMF1	OXNAD1	GPR183	ISG20	GRAP2	LOC541471	EPHB6	CRIP1	FAM53B	LOC282997	RBL2	GREM1	FAM195B	FOS	CIITA	FAIM3		ZMYND8		GIMAP7	DEDD2	CXCR6	FAM189A1	CTDSP2	EPB41L1	GNB1L	ENO1	CSNK1D	COL6A3	LOC90784		GYLTL1B	MALAT1	SP3	LTBP4	ITPK1-AS1	HNRNPC	DUSP10
DKK3	EPAS1	ECE1	DDIT4	CORO6	CLTA	CES4A	NAGPA	LRRC33	FCGR3B	MBD6	FAM65B	SLC25A26	PCBP1	GPR68	ITGB1	GRAPL	LOC646329	ERN1	CROCC	FAM78A	LOC439949	RBM38	GRK5	FAM53B	FOXF2	CLCN7	FAM100B		ZNF217		GLRX	DEF6	CXORF65	FAM3D	CUEDC1	EPB41L3	GPR17	ENOSF1	CTBP2	COMT	LPP		HDAC2	MCC	ST3GAL4	MALAT1	KIFC3	HNRNPF	DUSP14
DLC1	EPB41L1	EDIL3	DDO	CPEB2	CNDP1	CFL2	NCOR2	LRRFIP1	FGFR1OP2	MBNL1	FAM69A	SLMO2	PER1	GPRIN3	ITK	GRB7	LOC648987	ESYT2	CRTC2	FAM83A	LOC541471	RBM39	GSN	FAM78A	FSCN1	CLEC12A	FAM102A		ZNF429		GPR132	DENND2D	CYTH1	FAM53B	CXXC5	EPCAM	GRAMD4	EPCAM	CTNNA1	CORO1C	LRMP		HERC1	ME3	STAT4	MALL	KLF5	HNRPLL	DUSP4
DNMBP	ERF	EGLN2	DEPDC6	CPEB4	CNP	CHADL	NDST1	LYN	FHL3	MBP	FAM83A	SMAP2	PIK3IP1	GRAP2	ITPKB	GZF1	LOC653513	ETS1	CSF2	FAM89B	LOC648987	RGPD3	HAND2	FAM89B	FSTL1	CLIC1	FAM107B		ZNRF1		GPR15	DENND4A	CYTH4	FAM83F	DAB2IP	EPHA2	GRAP2	EPHA2	CTNND1	CPA4	LRRC33		HES3	MED27	SUMO1P1	MBNL2	KRT19	HPD	DUSP5
DOCK5	ERGIC1	EIF2C2	DGKZ	CRB2	CNTN2	CHD7	NDUFB7	MACF1	FIGNL1	MCL1	FBXW4P1	SMARCA2	PITPNC1	GYPC	JUNB	HDAC7	LOC730227	EVL	CSK	FCGR3A	LOC653513	RHOG	HDAC7	FBXO31	FXYD6	CLN8	FAM117A				GPR174	DERL1	CYTIP	FAM83G	DAGLA	EPPK1	GSG2	EPN1	CTSB	CPNE5	LYST		HIST1H3B	MEF2D	SYK	MCART1	KRT8	HSPA1A	DUSP6
DPF3	ETS1	ELMO1	DIP2B	CREB5	COBL	CHKA	NEAT1	MALAT1	FLI1	MCTP2	FGD2	SNORD53	PPP1CB	H3F3B	KDM6B	HECA	LPIN2	EZR	CTLA4	FCGR3B	LOC727896	RHOH	HEG1	FBXO32	GEM	CMIP	FAM3C				GPR183	DNAJB12	DAD1	FAM83H	DAPK2	EPS8L2	H2AFY	EPS8	CUBN	CREB3L1	MAL		HIST1H3E	MEGF11	TARBP1	MET	KRT80	IBTK	DYRK1A
DSP	FABP4	ELOVL1	DIP2C	CROCC	CORO1A	CHMP6	NFASC	MAPK14	FLJ13197	MDM1	FGD3	SPEN	PPP1R15A	HIPK1	KIAA0748	HIPK1	LRRFIP1	F2RL2	CXCR5	FHL3	LPXN	RUNX3	HIC1	FGD2	GJC1	CMTM6	FAM46C				GPR68	DNMT3A	DAZAP2	FHL2	DDIT4	ERBB2	H6PD	EPSTI1	CUEDC1	CREB3L2	MALAT1		HIST1H4D	MGAT3	TBC1D7	MGC16025	KYNU	ID1	EEF1A1
DST	FAM49A	EMBP1	DKK3	CRTC3	CORO2B	CHN2	NFIC	MAPKAPK3	FLJ35776	MEF2C	FLJ13197	SPTBN1	PPP2R5C	HIST1H3E	KLF12	HIST1H2BD	MAP3K1	FAIM3	CYTH1	FLJ32224	LRRFIP1	S100B	HIF1A	FGGY	GLTSCR1	COPG	FAM53B				GPRIN3	DOCK10	DDIT3	FLJ32224	DDR1	ERCC3	HBS1L	ERCC3	CUX1	CREBBP	MAP3K8		HIST1H4I	MIR1280	TBL1XR1	MIR100	LDHAL6B	ID2	EGFR
DUSP1	FAM50B	ENDOD1	DNAJB12	CRY2	CPNE2	CHRAC1	NFIX	MAPRE2	FNBP1	MEF2D	FLJ13224	ST8SIA4	PRKCH	HIVEP2	KLF13	HIVEP2	MBP	FAM100B	CYTH4	FLJ35776	LSR	SATB1	HOXA2	FHL1	GNAI2	COQ2	FAM65A				GRAP2	DOCK8	DDX17	FLNB	DEGS2	ERF	HDAC4	ERGIC1	CXCR7	CRIP2	MAPK13		HIST1H4K	MIR2355	TFAP2A	MIR183	LDLR	IFT81	EIF1
DUSP14	FAM53B	ENDOU	DNAJB2	CSNK1D	CRB2	CHST3	NOTCH2	MAT2B	FTH1	MEIS1	FLJ27354	STIM2	PTPRC	HLA-B	KLF2	HMOX2	MCL1	FAM113B	CYTIP	FLJ43663	LYST	SELPLG	HOXA3	FHL2	GREM1	COTL1	FAM65B				GRB7	DTHD1	DEDD2	FOS	DENND2D	ESRP1	HDHD1	ERRFI1	CXXC5	CROCC	MAPRE2		HIST2H2BC	MIR4311	THADA	MIR196B	LETM2	IFT88	EIF2C2
DUSP5	FBLN2	EPN2	DNAJC6	CSRNP1	CREB3L2	CLDN11	NOTCH2NL	MBNL1	GATA2	METT5D1	FLJ32224	STK17B	RALGDS	HLA-C	KLF6	HNRNPF	MDM4	FAM133B	DAD1	FLNA	MALAT1	SEMA4D	HOXA4	FILIP1	GRK5	CPEB4	FAM69A				HDAC7	DUSP1	DEF6	FOSB	DENND3	ETS2	HIST1H2BF	EZR	CYP2B7P1	CSRP3	MBNL1		HIST4H4	MIR548W	TMEM123	MIR200C	LGALS3	IGF2BP3	EIF6
DUSP7	FBN1	ERGIC1	DNMT3A	CSRP1	CROCC	CLDN20	NR1D1	MBP	GNA15	MIR1284	FLJ35776	STK4	RARA	HMBOX1	KLF9	HNRNPU	MGAT1	FAM53B	DDX17	FMNL1	MAPRE2	2015-09-09	HS1BP3	FLJ14107	GSN	CSF1R	FAM76B				HECA	DUSP10	DENND2D	FOSL2	DGKD	EXT1	HIST1H4B	F11R	CYP3A7	CTBP2	MCHR1		HK1	MIR641	TMX1	MIR21	LGALS3BP	IL17RE	ELK3
DYNLT1	FBXO48	FABP3	DOCK1	CTBP2	CRTC3	CLIC4	NR4A1	MCL1	GNAI2	MIR142	FLJ39582	TAGAP	RASA3	HNRNPF	LAPTM5	HSPA8	MIR142	FAM65B	DEDD2	FOS	MCL1	SLC38A1	HSPA8	FNIP2	HAAO	CSGALNACT2	FAM78A				HIVEP2	DUSP2	DENND4A	FOXA1	DGUOK	EZR	HIST1H4K	FAIM	DAB2	CTDSP2	MCL1		HMGA1	MIR648	TNFAIP2	MIR222	LOC100130275	JAG1	EMP1
EAPP	FERMT2	FAM102A	DOCK4	CTDSP2	CRYAB	CLIP2	NTM	MDM1	GNAQ	MIR21	FLJ43663	TBC1D2B	RBM14-RBM4	HNRPLL	LBH	ICAM2	MIR21	FAM9C	DEF6	FOSB	MDM4	SMG6	HSPG2	FOS	HDAC7	CTSB	FBRSL1				HIVEP3	DYNLT1	DHRS12	FOXA3	DLG4	FAM100B	HIVEP3	FAM101A	DAGLA	CTNND1	MDM4		HS3ST3B1	MIRLET7I	TNFRSF1A	MIR29B1	LOC100133985	KALRN	ENC1
EDIL3	FGD2	FAM123A	DPF3	CTTNBP2	CSF1	CLMN	NUAK1	MEF2C	GPBP1L1	MIR222	FMNL1	TMEM50A	RFC3	HSPA8	LCP1	IFITM1	MKNK2	FBLN7	DENND2D	FOSL2	MEF2D	SORL1	IER2	FOSB	HLF	CTSH	FCER2				HLA-B	EEF1A1	DHRS7	FOXD2	DLL4	FAM102A	HS6ST1	FAM120AOS	DDX52	CTSO	MIR1260B		HSBP1	MLN	TNS3	MIR3190	LOC100188947	KAZALD1	ENDOD1
EFCAB1	FGD5	FAM124A	DPYSL2	CUEDC1	CSK	CLSTN1	PCBP1	MEF2D	GPR21	MIR223	FOSB	TMEM66	RHOH	ICAM2	LCP2	IKZF1	MSN	FBXL22	DGKA	FTH1	MIDN	SPTBN1	IER3	FOSL2	HOXA3	CTSS	FCHSD2				HMOX2	EEF2K	DIAPH1	FOXK2	DMAP1	FAM108C1	ICOS	FAM134B	DEPDC1B	CUBN	MIR142		ID1	MRAP2	TNS4	MIR3918	LOC116437	KCNQ1OT1	ENO1
EGFR	FGF2	FAM125B	DSCAML1	CXXC5	CSNK1E	CLTA	PCDHGC5	MEIS1	GPX1	MIR23A	FOXO3	TMSB4X	SAMHD1	IER2	LDLR	IL16	MTIF3	FBXW4P1	DHRS12	FUT11	MIR1205	SRGN	IL1R2	FOXK1	HOXB2	CUX1	FIGNL1				HNRNPF	EFHD2	DNAJB1	FRAT2	DNAJB6	FAM120AOS	ID2	FAM135A	DEPDC6	CUEDC1	MIR181A1		ID3	MRPL14	TRIM7	MIR636	LOC154822	KDM4C	ENSA
ELK3	FGFR1	FAM134B	DST	CYB5R2	CSRNP1	CLU	PDE4DIP	METT5D1	GSDMC	MIR3188	FUT11	TNFAIP8	SATB1	IKZF1	LFNG	IL18BP	MYH9	FGD3	DLEU2	FYB	MIR1265	ST3GAL1	IL4R	FOXO3	HOXB3	CX3CR1	FLI1				HRASLS2	EFNA5	DNMT3A	FXYD3	DSP	FAM129B	IFITM3	FAM13A	DHRS3	CXXC5	MIR4269		IDO2	MRPS23	TSC22D1	MKNK2	LOC283404	KHDRBS3	ENTPD7
EML1	FHL1	FAM13C	DUSP1	CYTH1	CSRP1	CNDP1	PDGFRB	METTL2B	GUCY1A3	MIR326	FXYD5	TRAF1	SELPLG	IL10RA	LOC100129387	IL32	MYL12B	FIGNL1	DOCK10	FYN	MIR1284	STAT3	IL6R	FSD2	HS1BP3	CXCR2P1	FLJ32224				HSPA8	EGLN2	DOCK10	FZD5	DTX2	FAM83G	IFNAR2	FAM53B	DNASE1	CYTH1	MIR650		IER2	MST1P2	TSKU	MNT	LOC284751	KIAA0182	EPAS1
EMP1	FLI1	FAM178B	DUSP16	DAAM2	CTBP2	CNP	PDK2	MIR1284	H2AFY	MSI2	FYB	TRIB1	SEMA4D	IL16	LOC100130581	IL4R	MYO1G	FKBP5	DOK2	GATAD2A	MIR142	STK10	IQGAP1	FYCO1	HSPG2	CXCR4	FLJ40292				HSPC157	EGOT	DOCK8	GALE	DTX4	FAM83H	IGF2R	FAM84A	DPP4	CYTH3	MNS1		IFITM1	MTSS1	USP44	MPP7	LOC388942	KLHDC2	EPHA2
ENC1	FLJ13197	FAM49B	DUSP7	DAB2IP	CTDSP1	CNTN2	PER1	MIR142	HDAC7	NBN	FYN	TTC39C	SLA	IL2RB	LOC100133985	IL6R	NCK2	FLI1	DRD3	GDF15	MIR23A	STK17A	IRF1	FZD7	ID2	CXORF21	FMNL1				IER2	EHD1	DUSP2	GAS6	DUOX2	FASN	IGFBP2	FAM84B	DUSP1	DAB2	MSI2		IGF2BP1	MYT1L	ZDHHC7	MPRIP	LOC400931	LGR4	ERRFI1
EPHB6	FLJ14107	FAM53B	DUSP8	DACT3	CTDSP2	COBL	PHACTR3	MIR21	HDGF	NBPF10	GALM	UBE2D3	SLAMF1	IL7R	LOC100289230	IL6ST	NCRNA00152	FLJ10661	DUSP16	GGPS1	MIR3188	STK17B	IRF2	GABARAPL1	ID3	CYBB	FNBP1				IFITM3	ELF1	DYNLT1	GATA6	DUSP1	FGFR3	IGLL5	FGD6	DUSP16	DAPK3	MTIF3		IGF2BP3	NAA11	ZFP36L1	MRPS22	LOC541471	LIAS	ESYT2
ERRFI1	FLJ34208	FAM83D	DYNLRB1	DCTN1	CUEDC1	CORO2B	PHLDB1	MIR222	HEATR5B	NBR1	GAPVD1	USP20	SLC44A2	INPP4A	LOC100507217	IL7R	NDUFV2	FLJ42392	DUSP2	GNB2L1	MIR365-2	STK4	IRF2BP2	GALNT2	IGFBP4	CYTH1	FOXO1				IKZF1	ELL	EEF1A1	GATAD2A	DUSP8	FKBP5	IKZF1	FHDC1	DUSP5	DBN1	MYH9		IGFBPL1	NAPA	ZFP36L2	MRVI1	LOC554202	LIFR	ETS1
ETS1	FLJ43663	FANCI	ECE1	DDIT4	CXXC5	CORO6	PHYHIPL	MIR223	HECTD1	NCAM2	GATA1	USP3	SLMO2	INPP5D	LOC220906	INPP4A	NFATC2	FNBP1	ECE1	GNG2	MIR548Z	TBCC	IRS1	GBE1	IGFBP5	DAP	GCM1				IL10RA	ELOVL5	EEF2K	GCNT3	EFHD2	FLII	IKZF2	FLNB	DUSP6	DDR2	NCOA4		INO80D	NARS2	ZNF217	MSRB3	LOC646329	LIMA1	ETS2
EVC	FMNL2	FEZ1	EFNB2	DDO	CYB5R2	CPEB2	PICK1	MIR23A	HEMGN	NCOA4	GATAD2A	WHSC1L1	SMAP2	IPCEF1	LOC282997	IRF1	NLRC5	FOXO1	EDEM1	GPANK1	MIR623	TCF7	ISG20	GBF1	IGHMBP2	DAPK1	GLIPR2				IL32	EML4	EFHD2	GNA11	EFNA1	FLJ13197	IL32	FNIP2	ECE1	DDX5	NCRNA00152		ITGB1	NAV1	ZNF673	MTAP	LOC648987	LIME1	EXT1
F2RL1	FNDC3B	FGFR2	EFR3B	DENND5A	CYTH1	CPEB4	PIK3C2B	MIR326	HEXIM1	NCRNA00152	GATSL3	ZBTB38	SMG6	IQSEC1	LOC541471	IRF2BP2	NR4A2	FRMD4A	EEF1A1	GPR183	MOBKL2A	TGFBR2	ITGA1	GLOD4	IL4R	DARS	GNB5				IL7R	EMP3	EGLN2	GNAI2	EFNB1	FLJ32224	IL7R	FOS	EDN1	DENND2A	NCRNA00221		ITPRIP	NCOR2		MTFP1	LOC727677	LIMK2	EZR
FAM101A	FNIP2	FKBP5	EGLN2	DEPDC6	DAAM2	CRB2	PITPNM2	MMRN1	HIPK1	NCRNA00184	GIMAP8	ZC3H12D	SORL1	IRF1	LOC644246	ISY1	NTRK1	FYB	EGOT	GPR68	MRPL1	TMSB10	ITGB1	GPRC5C	IL6R	DENND2D	GNG2				INPP4A	EOMES	EHD1	GNB1	EGFR	FLJ44511	INPP4B	FOSL2	EEF1A1	DHRS3	NCRNA00226		ITSN1	NCRNA00184		MTHFD1L	LRRC27	LIPC	FAM129B
FAM105A	FOXO1	FLJ37543	EGOT	DGCR6	DAB2IP	CREB5	PLCG1	MSI2	HIPK3	NEAT1	GLIPR1	ZC3HAV1	SPATA13	ISG20	LOC645158	ITK	NXT1	FYN	EGR2	GPRIN3	MX2	TMSB4X	ITGB5	GPX3	INO80C	DENND3	GNG7				IQSEC1	EPHA4	EHD4	GOLGA3	EGLN2	FOS	IQSEC1	FOXA1	EFNA1	DIRC3	NDUFB9		JARID2	NCS1		MYC	LSM10	LOC100129316	FAM136A
FAM129B	FSTL1	FLRT1	EHD1	DGKZ	DBNDD2	CROCC	PLEKHG3	NBPF10	HIST1H2AG	NEK7	GPCPD1	ZFP36	SPTBN1	ITGB1	LOC646329	ITPKB	OGDH	GALM	EHD4	GRAP2	MYH9	TNFAIP3	ITPK1-AS1	GRB10	IRF2BP2	DENND4A	GPR132				IRAK2	ESYT2	EIF1	GP9	EGR3	FOSB	IRF1	FOXO3	EGLN2	DKFZP451B082	NEIL3		KCMF1	NEUROD4		MYEOV	LTBP4	LOC100130557	FAM176A
FAM131A	FTH1	FMNL2	EIF2C2	DHCR7	DCTN1	CRTC3	PLLP	NCK2	HIST1H4H	NFE2L2	GPR113	ZFP36L1	SRSF3	ITK	LOC653513	ITPRIP	PBXIP1	GATAD2A	EIF1	GTPBP2	NCK2	TNFAIP8	ITPKB	GRIP2	ISL1	DGCR2	GPR18				IRF1	ETS1	EIF5A	GPRC5A	EIF1	FOSL2	IRX3	FOXP4	EGOT	DLC1	NFATC3		KCTD10	NEUROG1		MYOF	LYRM1	LOC100130894	FAM196B
FAM196B	FZD4	FOLH1	ELL	DIXDC1	DDIT4	CRY2	POLR3H	NCOA4	HLA-DMA	NOTCH2	GPR183	ZFP36L2	SSTR3	ITPKB	LOC727896	JUNB	PDE4B	GBP5	EIF2C2	GYPC	NCRNA00152	TPP2	ITPKC	GSN	ISL2	DGKG	GPR68				IRF2BP2	EVI2A	ELF1	GPRC5C	EIF2C2	FOXA1	ITGA4	FTH1	EIF6	DLK1	NR1D1		KDM2B	NFAM1		NAB2	MAFK	LOC100131060	FAM200B
FAM83C	GBE1	FRMD4A	ELMO1	DKFZP434K028	DDO	CSNK1E	POMT2	NCRNA00152	HNRNPA2B1	NRIP1	GPR68	ZNF217	STAT5B	JUNB	LOC730227	KCNA3	PHF15	GIMAP8	ELK3	H3F3B	NDFIP1	TRAF1	ITPRIP	GTF2IRD1	ITGA5	DGKZ	GPX1				ISG20	EVL	ELL	GRAMD4	ELF3	FOXD2	ITK	FZD5	ELF1	DLL4	NR3C1		KIAA0408	NFIA		NACC2	MALAT1	LOC100131496	FAM53B
FANK1	GCOM1	FRMD4B	EML1	DKK3	DDR1	CSRNP1	POU3F3	NEAT1	HNRNPA3	PBXIP1	GPRIN3		STIM1	KBTBD2	LRRFIP1	KIAA0748	PIK3IP1	GIT2	ELL	HDAC4	NEAT1	TRY6	JPH2	GYG1	ITPKB	DHRS7B	GRAP				ITGA4	EZR	ELOVL5	GSN	ELF4	FOXO3	JMJD5	GAB1	ELF3	DMPK	NSMAF		KIAA1522	NFIX		NCRNA00093	MAPK3	LOC100134229	FAM83B
FBN1	GHR	FRYL	ENDOD1	DLG2	DFNB31	CSRP1	PPP2R1B	NEK7	HNRNPD	PIK3R1	GRAP2		STK10	KDM6B	MALAT1	KIAA0922	PIM2	GLIPR1	ELOVL5	HDGF	NLRC5	TSC22D3	JUNB	H2AFY	JAG1	DIAPH1	GRAPL				ITGB1	FAIM3	EML4	GSS	ELL	FRAT2	KAZ	GADD45A	ENC1	DNAJB12	OR4N3P		KIAA1737	NOTCH1		NCRNA00173	MBP	LOC100289673	FAM84B
FGF20	GLRX	FTH1	ENPP2	DLL1	DGCR6	CTBP2	PREX1	NOTCH2	HNRNPF	PLAC8	GRB7		STK17B	KLF12	MAP3K1	KIAA1267	PIP4K2A	GLRX	EMP3	HEXIM1	OXNAD1	TSPAN14	KANK1	H6PD	JMJD4	DLEU1	GRB7				ITK	FAM107B	EMP3	H1F0	ENO1	FZD5	KIAA0182	GALNT4	ENO1	DNAJB5	OXNAD1		KILLIN	NOX5		NEAT1	MCFD2	LOC151534	FAM91A1
FHL2	GNAI1	FXYD3	EPCAM	DNAJB12	DGKD	CTNND2	PRKCA	NOTCH2NL	HOXA7	PNKD	GTF2H1		STK38	KLF13	MAP7D1	KLF13	PLCG1	GNA13	EPC1	HIRA	PCBP1	UCP2	KIAA0247	HADH	JPH2	DMXL2	GRHPR				ITPKB	FAM113B	EPM2AIP1	H2AFJ	EPB41L1	GADD45A	KIAA0748	GANC	ENOSF1	DNMT3A	PAFAH2		KLKB1	NRXN1		NFIC	ME3	LOC284661	FAT1
FILIP1L	GNAI2	FXYD4	ERGIC1	DNAJC6	DGKZ	CTTNBP2	PRODH	NRIP1	HSPG2	PNRC1	HDGF		STK4	KLF2	MAT2B	KLF2	PLEC	GNG2	EPHB6	HIST1H2BC	PIK3IP1	USP20	KIRREL	HDAC5	JUN	DNAJB12	GRK5				JUNB	FAM117A	ERF	HCG27	EPB41L4B	GADD45B	KIAA0922	GATA4	ENPP7	DOCK9	PILRB		LARS2	NTNG2		NR2F1	MGC87042	LOC285419	FBXO32
FLJ13197	GNG2	GAB1	ETV6	DOCK10	DKFZP451B082	CUEDC1	PSD2	ORAI2	HTR1F	PPP1R15B	HECA		STX16	KLF6	MBNL1	KLF9	PLEKHF1	GPR15	ERN1	HIST1H3H	PIP4K2A	USP3	KLF13	HDAC7	KCNH2	DNAJC7	H3F3B				KCNA3	FAM159A	ESYT2	HIGD1A	EPCAM	GALE	KIAA0947	GATA5	EPCAM	DPYSL2	PITPNC1		LDLRAD3	OLFM1		NSMCE2	MICAL2	LOC286359	FDPSL2A
FLJ32224	GPAM	GAB2	FAIM2	DOCK4	DKK3	CXORF26	PTMA	P2RX1	ICAM2	PPP2R5C	HEXIM2		SUSD3	KLF9	MBP	KLHL3	PNRC2	GPR174	ESYT2	HIST1H4I	PITPNC1	WIPF1	KLF5	HDAC9	KCNMA1	DOCK10	HCST				KDM6B	FAM49B	ETS1	HIST2H2BC	EPHA2	GAPDH	KLF12	GATA6	EPHA2	DUSP1	PITPNM2		LEMD2	OLIG2		NTSR1	MIDN	LOC339894	FEM1B
FLJ35776	GPR3	GADD45G	FAM102A	DOCK5	DLL1	CXXC5	RAB40B	PCBP1	IER2	PPP6R1	HIST1H2AC		TAGAP	KLRK1	MCL1	KRT73	PPP2R5C	GPRIN3	ETS1	HIST2H2BC	PLAC8	ZBTB25	KLF6	HIC1	KCTD10	DOCK5	HDAC7				KIAA0922	FAM53B	EVI2A	HK2	EPHB2	GAS6	KLF6	GCNT1	EPN1	DUSP10	PLEKHG1		LEPREL1	P2RX1		OBFC1	MIR139	LOC401097	FGD4
FLNC	GPX3	GAPDH	FAM123A	DPF3	DNAJB12	CYB5R2	RALGDS	PCMTD1	IKZF1	PRKACB	HIST1H2BF		TBCC	LAPTM5	MDM4	LAPTM5	PREX1	GRAP2	EVL	HIST2H3C	PPP1R15A	ZC3H4	KLF7	HIF1A	KIAA0754	DOCK8	HERPUD1				KLF13	FAM65A	EVL	HNF1B	EPN1	GATA6	LAIR1	GCNT2	EPS8	DYRK1A	PNRC2		LGR4	PCDH8		ONECUT3	MIR21	LPIN2	FGD6
FN1	GRK5	GAS7	FAM124A	DPYSL2	DOCK5	CYTH1	RHOBTB2	PHTF1	INPP5D	PROM1	HIST1H3H		TC2N	LBH	MEF2D	LBH	PRKCH	GRB2	EWSR1	HIVEP2	PPP2R5C	ZC3HAV1	KLF9	HIPK3	KIAA0802	DPEP2	HERPUD2				KLF6	FAM65B	EZR	HNRNPF	EPN3	GLUD1	LAIR2	GCOM1	EPSTI1	EBF1	PPP2R5C		LIN28B	PDE4DIP		OSTCL	MIR2278	LYPLAL1	FGFBP1
FNDC3B	GSN	GIT1	FAM125B	DSCAML1	DPYSL2	DAAM2	RNF216	PIK3R1	IQGAP2	PTEN	HIST1H4I		TCF7	LCP1	MGAT1	LCK	PRKCQ	GZF1	FAM100B	HNRNPA2B1	PRKCH	ZFP36	LGALS3	HIVEP2	KIAA1274	DPYSL2	HIRA				KLF9	FAM78A	FAIM3	HSD11B2	EPPK1	GNA11	LAT2	GDA	ERCC3	EBF2	PRKCQ		LMBRD1	PDLIM1		PALLD	MIR3128	MBNL3	FILIP1L
FOS	GSTM3	GLRX	FAM134B	DST	DSCAML1	DAB2IP	RNF220	PIM1	IRF1	PTGES3	HIVEP2		TGFBR2	LCP2	MIDN	LCP1	PTP4A2	HDAC7	FAM102A	HNRNPF	PTGER4	ZFP36L2	LHFPL2	HK1	KIAA1712	DUSP1	HIVEP2				KRAS	FAM83D	FAM102A	HSPG2	EPS8L3	GNAI2	LCK	GK	ERGIC1	EBF3	PRMT7		LOC100131551	PEX14		PARD6B	MIR4287	MCEE	FKBP5
FOSB	HAAO	GLT25D2	FAM13C	DTNB	DTX4	DCTN1	RTDR1	PNKD	IRF2BP2	PTPRC	HK1		THOC3	LEPROTL1	MIR1284	LCP2	PTPRC	HECA	FAM53B	HNRNPL	PTMA	ZHX2	LIMA1	HNRNPL	KLF6	DUSP10	HLA-DPA1				LAPTM5	FAM89B	FAM108A1	ID1	ERBB2	GNB1	LCP2	GLRX	ERRFI1	EDEM3	PRSS2		LOC100132831	PHC2		PCDH7	MIR548AA1	METTL7A	FKBP9
FOSL2	HBP1	GLTP	FAM168B	DTX4	DUSP1	DDIT4	RTN4	PPP1R15A	ITGA4	RAD23A	HMGN4		TMEM2	LITAF	MIR142	LDLRAP1	RAB27A	HIPK1	FAM65B	HSPA9	PTPN6	ZNF217	LOC100129716	HOXC4	KLF9	DUSP22	HLA-DRA				LASP1	FASLG	FAM113B	IER2	ERCC3	GOLGA3	LDHD	GNA11	ETS2	EGFL7	PSAP		LOC100132891	PITPNM2		PDE4B	MIR612	MIR1207	FKBP9L
FOXL1	HDAC7	GNAI2	FAM178B	DUSP10	DUSP7	DDO	SASH1	PPP2R5C	ITGA5	RALGDS	HMOX2		TMSB4X	LMNA	MIR21	LEF1	RAC2	HIVEP2	FAM78A	HSPC157	PTPRC	ZNF331	LOC100129726	HSPB1	KLHL29	DUSP6	HLA-DRB1				LBH	FCGR3A	FAM118A	IMPA2	ERGIC1	GPRC5C	LEF1	GNG12	EZR	EGFLAM	PSMG2		LOC100133985	PLCL2		PDP1	MIR760	MIR1284	FLJ10038
FRMD6	HERC1	GNAZ	FAM49A	DUSP16	DYSF	DEPDC6	SCARB2	PPP6R1	ITGA9	RARA	HNRNPA2B1		TNFAIP8	LOC100130581	MIR23A	LGMN	RAPGEF1	HK1	FAM89B	HSPH1	PVRIG	ZNF831	LOC100131496	HSPB8	KLHL38	DYRK1A	HMBOX1				LCP2	FCGR3B	FAM179A	INF2	ESRP2	GRAMD4	LOC100129345	GOSR2	F11R	EGFR	PTCRA		LOC100499467	PLDN		PFN1	MIR944	MIR181A2	FLJ20021
FSTL1	HIF1A	GNG7	FAM49B	DUSP7	ECE1	DGCR6	SCHIP1	PRKACB	ITPKB	RBM39	HNRNPF		TRAF1	LOC100131434	MIR3188	LINS	RARA	HMOX2	FASLG	ICAM2	RAC2		LOC100507217	IER2	LAMA4	E2F3	HNRNPF				LDLR	FCRL3	FAM49B	IRF1	ETS2	GRB7	LOC100133985	GPR128	F2RL1	EHD1	PTGES3		LOC100507217	PLEKHA6		PGLS	MKLN1	MIR23B	FLJ32224
FZD2	HIPK2	GPM6B	FAM53B	DYNC1LI2	EFHD1	DGKZ	SEMA7A	PRR16	ITPR1	RCSD1	HNRPLL		TRAF3IP3	LOC100133985	MIR3652	LITAF	RASA3	HNRNPF	FBXW4P1	ID2	RALGDS		LOC148696	IER5	LAMA5	ECHDC1	HNRNPL				LFNG	FGR	FAM53B	IRF2BP2	EXT1	GRHL2	LOC100188949	GPRC5A	FAIM	EHD4	PTK2B		LOC150786	PLXND1		PHF15	MKNK2	MIR3142	FLJ35776
GADD45A	HK2	GPR3	FAM65A	DYNLRB1	EGLN2	DIP2C	SERP2	PSMA6	JARID2	REL	HSPA6		TRIB1	LOC282997	MIR548Z	LOC100129387	RASGRP1	ICAM2	FGD3	IER2	RARA		LOC283335	IFITM1	LBR	EDEM1	HTRA4				LMNA	FLI1	FAM65B	ISG20	EZR	HES1	LOC148189	GPRC5C	FAM100B	EIF1	PTP4A2		LOC284379	POU2AF1		PHLDA1	MOCOS	MIR3170	FLJ42351
GADD45B	HRASLS2	GPR56	FBXW4P1	DYSF	EIF2C2	DKFZP434K028	SH2D6	PTEN	JMJD1C	RFX2	HSPC157		TRY6	LOC541471	MKNK2	LOC100130581	RASSF5	IFNAR2	FIGNL1	IER5	RASA3		LOC400550	IGFBP4	LDB3	EED	ICOSLG				LOC100129269	FLJ13197	FAM78A	ITGA6	FABP1	HIGD1A	LOC148696	GRK5	FAM102A	EIF2C2	PTPRC		LOC285847	PPP2R1B		PIM3	MPRIP	MIR365-2	FLJ43663
GALNT2	HRASLS5	GPRC5B	FCHO1	ECE1	ELL	DKFZP451B082	SIRPA	PTPRC	KIAA0125	RFX3	ICA1		TSC22D3	LOC644714	MYH9	LOC100216545	RHOG	IL10RA	FLJ21408	IFFO2	RBM39		LOC541471	IGFBP5	LHFPL2	EEF1A1	ID3				LOC100130298	FLJ21408	FASLG	ITGB4	FABP3	HIVEP1	LOC149086	GSN	FAM120AOS	ELK3	RAD51L1		LOC388942	PRDM11		PLAU	MSN	MIR3682	FLNB
GALNTL2	HS1BP3	GRAMD3	FEZ1	EFNB2	ELMO1	DKK3	SKI	RAD23A	KIAA0182	RHOH	IER5		TXNIP	LOC645158	NCK2	LOC100289511	RHOH	IL16	FLJ27354	IFITM1	RFC3		LOC646329	IL6R	LIMS2	EFHD2	IER2				LOC100133985	FLJ32224	FBXW4P1	ITM2C	FAM100B	HNF1B	LOC154822	GSTP1	FAM134B	ELL	RAG1		LOC400236	PREX1		PLEKHH3	MTHFR	MIR549	FLRT2
GAP43	HSPA8	GRASP	FGF1	EGLN2	ELN	DLG2	SLC1A3	RALGDS	KIAA0247	RNF220	IFT122		UBE2D3	LOC646329	NCRNA00152	LOC100507217	RNASEK	IL19	FLJ32224	IKZF1	RHOG		LOC723809	IP6K3	LMNA	EHD1	IFI30				LOC100289230	FLJ35776	FBXW7	ITPK1-AS1	FAM102A	HOXA9	LOC200261	GTF2IRD1	FAM135A	EMBP1	RASA3		LOC400654	PRKCE		POU5F1B	MYC	MIR583	FLRT3
GAPDH	HSPB1	GRHPR	FGFR2	EHD1	ENDOD1	DLGAP4	SLC48A1	RARA	KIAA0748	RNLS	IKZF1		UCP2	LOC648987	NDUFV2	LOC439949	RNASET2	IL2RA	FLJ35776	IL10RA	RHOH		LOC729970	IRF2BP2	LMO3	EIF2C1	IFNGR2				LOC100507217	FLJ43663	FCGR3A	ITPKA	FAM108C1	HSD11B2	LOC283177	GTPBP1	FAM13A	EML4	RASSF5		LOC400927	PRR5		PPP2R4	MYL12B	MOGAT1	FN1
GDF6	HSPG2	GRM3	FKBP5	EIF2C2	ENDOU	DNAJB12	SLC6A1	RC3H2	KIAA1267	RPL21P28	IL10RA		USP20	LOC653513	NEAT1	LOC645158	RORA	IL2RB	FLJ43663	IL16	RUNX3		LOC730227	IRS1	LOC100128361	ELF1	IGLL5				LOC148696	FLJ45079	FCGR3B	ITPR3	FAM129B	HSPA1B	LOC284749	HBP1	FAM50B	EMP2	RASSF6		LOC401134	PRRT2		PPP3CA	MYOF	MRPS23	FNDC3B
GLI2	IFNGR1	GSN	FLJ13197	ELL2	ENPP2	DNAJB2	SMCR5	REPIN1	KILLIN	RPS9	IL23A		WHSC1L1	LOC727896	NEK8	LOC646329	RUNX3	IL32	FMNL1	INPP4A	S100B		LRCH1	ITGB6	LOC100129269	ELK3	IKZF1				LOC220906	FMNL1	FGD3	JUNB	FAM38A	HSPG2	LOC285577	HES1	FAM53B	ENO1	RBM33		LOC401164	PTMS		PRF1	MYPN	MTDH	FOS
GLIS3	IFNGR2	H1FOO	FLJ32224	ELMO1	EPHB2	DNAJC6	SNORA14B	RFX2	KLF6	RRN3P2	IL6R		WIPF1	LOC90784	NFATC1	LOC653513	SEMA4D	IL4R	FNBP1	INPP5D	SAMHD1		LRIG1	ITPKB	LOC100129726	ELL	IKZF3				LOC282997	FNBP1	FIGNL1	JUP	FAM3D	ID1	LOC339568	HIST4H4	FAM83G	EPB41L2	RHBDD1		LOC541471	PTPRF		PRKACB	NCLN	MTMR12	FOSB
GLRX	IGF1	HABP4	FLJ37543	ELN	EPHX1	DOCK4	SNORD62B	RHOG	KLF7	RSPH1	IL7R		ZC3H12D	LPXN	NFATC2	LOC727896	2015-09-09	IL6R	FOSB	INSIG1	SATB1		LRRFIP1	JOSD2	LOC100130581	ELOVL5	IL10RA				LOC374443	FOSB	FLI1	KCNK5	FAM53B	ID2	LOC541471	HKDC1	FAM84A	EPHA2	RHOH		LOC728743	PTPRJ		PTMA	NCOR2	MTMR2	FOSL2
GNAI2	IL1R1	HDAC4	FLJ43663	EMBP1	EPS8L3	DOCK5	SORBS1	RHOH	KLF9	RUNX1	INPP4A		ZC3HAV1	LRRFIP1	NFKBIA	LOC730227	SH2B3	IL6ST	FOSL2	IQSEC1	SBDS		LTBP1	JPH1	LOC100130855	EMILIN2	IL16				LOC401093	FOSL2	FLJ13197	KCTD5	FAM83F	ID3	LOC641518	HMGCS2	FAM84B	ERG	RNASEH2B		LOC729467	PUM2		PTP4A2	NCRNA00152	MYADM	FRMD5
GREM1	IQGAP1	HDAC5	FLRT1	ENDOD1	ERF	DPF3	SORT1	RNF220	LAPTM4A	SCAMP1	INPP4B		ZFP36	LSR	NLRC5	LRRFIP1	SH3BGRL3	IL7R	FOXO1	IRF1	SBDSP1		LY86	JPH2	LOC100131496	ENO1	IL6				LOC541471	FYB	FLJ21408	KDM6B	FAM83G	IER2	LOC643837	HNF4G	FCHSD2	ERGIC1	RPTOR		LPHN2	QSOX1		PWWP2B	NCRNA00160	MYH9	FRMD6
GSG1	IRF1	HEPACAM	FMNL2	ENOX1	ERGIC1	DPYSL2	SOX10	RRN3P2	LAPTM5	SDCCAG8	INPP5D		ZFP36L2	LYST	NR1D1	MALAT1	SH3BP1	INPP4A	FOXP1	ISCU	SCML4		LYRM1	JUN	LOC100188947	ENSA	INF2				LOC645158	FYN	FLJ32224	KIAA0232	FBRSL1	IHH	LOC647107	HNRNPF	FEM1B	ERLIN2	SAP30BP		LRIG2	RAI1		PXN	NCRNA00189	NAGLU	FST
GSN	IRF2BP2	HHATL	FNBP1	ENPP2	EVI5L	DSCAML1	SOX2	RUNX1	LCP1	SERPINB1	IPCEF1		ZNF217	MALAT1	NUP210	MAP7D1	SIPA1	INPP5D	FURIN	ISG20	SELPLG		MALAT1	KCNJ11	LOC100216545	ENTPD1	INPP5A				LOC646329	GAB3	FLJ35776	KIAA1522	FBXL14	IMPA2	LOC728606	HOXA3	FGD6	ESYT2	SATB1		LRRTM2	RALGAPA2		RAI1	NCRNA00200	NANOG	FTO
HDGF	IRS1	HIP1R	FOLH1	EVI5L	EVL	DUSP10	SRCIN1	RUNX2	LCP2	SERTAD2	IQGAP1			MAP7D1	ODF3B	MAT2B	SKI	IRAK2	FXYD5	ITGA5	SEMA4D		MAMDC2	KCNN3	LOC100271702	EPB41L3	INPP5D				LOC648987	GAS7	FLJ43663	KIAA1671	FDFT1	INF2	LOC728724	HOXB2	FGGY	ETS1	SEC61B		MACC1	RALGDS		RARA	NCRNA00263	NAV2	GADD45A
HES1	ITGA1	HIPK2	FOXK1	FA2H	FAIM2	DUSP16	SSBP3	RUNX3	LDB1	SH3BGRL3	IQSEC1			MAPRE2	OGDH	MCL1	SLA	IRF2BP2	FYN	ITGB1	2015-09-09		MAP1LC3B	KIAA0195	LOC148696	EPC1	IQSEC1				LOC653513	GIMAP2	FMNL3	KIAA1737	FGD4	ING1	LOC729177	HSPG2	FLJ32224	ETV6	SEMA4D		MALAT1	RAN		RCC1	NCRNA00277	NCOA3	GALNT2
HIC1	ITGB1BP1	HLF	FOXN2	FAIM2	FAM102A	DUSP7	ST3GAL5	SCAMP1	LEPROT	SLC35B1	IRF1			MAT2B	ORAI2	MDM4	SLAMF1	IRF8	GALM	ITK	SIRT4		MAP3K14	KIAA0240	LOC255130	ERGIC1	IRF1				LOC727896	GIT1	FNBP1	KLF13	FHL2	IRF2BP2	LOC730227	ICK	FLJ35776	FAM105A	SEMA7A		MAP3K7	RAP1GAP2		RNF43	NEK2	NCRNA00184	GALNT5
HIF1A	ITGB5	HMG20A	FOXO3	FAM102A	FAM105B	DUSP8	STMN4	SCHIP1	LEPROTL1	SMEK1	IRF2BP2			MBNL1	PBXIP1	MGAT1	SLC35B1	ISY1	GAPDH	ITPKB	SLA		MAP3K8	KIAA0247	LOC283335	ERLIN1	IRF5				LOC730227	GLIPR2	FOSB	KLF5	FKBP2	ITGA6	LPP	ID1	FLNB	FAM129B	2015-09-09		MAP4K3	RAPGEF1		RNPEPL1	NFKBIA	NDRG1	GAP43
HIPK2	ITIH5	HMOX2	FRMD4A	FAM123A	FAM123A	DYNC1LI2	SUN2	SDCCAG8	LGMN	SNORD84	ISCU			MBP	PCBP1	MGAT4A	SLC35E2B	ITGA6	GGA3	ITPRIP	SLFN5		MAP7D1	KIAA0922	LOC284751	ESYT2	IRF8				LRRFIP1	GLRX	FOSL2	KLF6	FKBP5	ITGB4	LRRC2	ID2	FOS	FAM156B	SERINC5		MAP7	RCN1		RPSAP52	NFX1	NDUFV2	GCLC
HIVEP2	ITPK1	HS1BP3	FSCN1	FAM124A	FAM124A	DYNLRB1	SYNJ2	SELL	LIMS1	SPPL2B	ISG20			MCL1	PER1	MIR1206	SLC7A6	ITGB1	GIMAP2	JUN	SMAP2		MBNL1	KIAA1671	LOC400238	ETV6	ISG20				LSR	GNG2	FOXJ2	KLF9	FLJ13197	ITM2C	LRRC33	ID3	FOSL2	FAM174B	SERP2		MAPK10	RFX2		S100A2	NNMT	NHSL1	GLS
HMGA2	ITPKB	HSP90AB1	FTH1	FAM125B	FAM125B	ECE1	TARBP1	SERPINB1	LMO2	SPTBN1	ITGA5			MED15	PIK3IP1	MIR1260B	SMAD3	ITGB2	GIMAP5	JUNB	SMG6		MBNL2	KIAA1737	LOC400550	F2RL2	ITGA4				LYST	GNLY	FUT11	KRAS	FLJ32224	ITPKA	LRRC38	IER5L	FOXA1	FAM178A	SERTAD2		MDH1	RIN2		S100A4	NR4A1	NPC1	GNAI2
HOXA2	ITSN1	HSPB1	FXYD3	FAM134B	FAM129B	EFHD1	TCF4	SERTAD2	LOC100129387	SPTLC2	ITGB1			MEF2D	PKDCC	MIR1301	SMARCE1	ITK	GLRX	JUND	SORL1		MBP	KLF13	LOC653513	FAM105A	ITM2C				MACF1	GPBP1	FYB	KRT8	FLJ35776	ITPR3	LY86-AS1	IFIT3	FOXO3	FAM18B2	SH2D1A		MFGE8	RTN1		S100A6	OBFC1	NQO1	GPR125
HOXB2	JAG1	HTRA1	FYN	FAM13C	FAM134B	EFR3B	TEF	SH3BGRL3	LOC100129716	ST3GAL1	ITK			MGC39372	PLCG1	MIR142	SNX20	ITM2B	GLS	KBTBD2	SPEN		MEF2C	KLF6	LOXL2	FAM120AOS	ITPKB				MAP2K3	GPCPD1	FYN	LAD1	FLNB	JUN	LZTS1	IFNGR1	FOXP1	FAM20B	SLA		MIAT	RTN4		SCD	OGDH	NR0B2	GPR135
HS3ST3A1	JAK1	ICK	GAB1	FAM168B	FAM13C	EGLN2	TFEB	SIK3	LOC100131496	ST8SIA6	ITPKB			MIR1205	PLEC	MIR23A	SORL1	ITPKB	GNA13	KCNN4	SPTBN1		MEF2D	KLF9	LPP	FAM129B	ITPR1				MAP7D1	GPR132	G3BP2	LASP1	FOS	JUNB	MACF1	IGF2BP1	FOXP4	FAM50B	SLAMF1		MIR106A	RXRA		SCNN1A	OLFM1	NR5A1	GPR87
HTR1D	KANK1	ID3	GAB2	FAM19A5	FAM19A5	EHD3	THRA	SLC35B1	LOC100216545	STAG2	ITPRIP			MIR1276	PPP1CB	MIR3128	SPATA13	ITPRIP	GNA15	KDM2B	SRGN		MEIS1	KLHL24	LRCH1	FAM196B	JARID2				MAPRE2	GPR174	GAB3	LEFTY1	FOSB	JUP	MALAT1	IGFBP2	FTH1	FAM53B	SLC19A1		MIR1204	RYR2		SEMA7A	PADI1	NRIP1	GPRC5A
ID3	KCTD10	IFIT3	GALNT2	FAM49A	FAM49B	EIF2C2	TIMP2	SLC38A2	LOC100499183	STAT5A	JARID2			MIR1284	PPP1R15A	MIR612	SPOCK2	JAK1	GNAI2	KDM6B	SRSF3		MEIS2	KLHL31	LRIG1	FAM45A	JUN				MBNL1	GPR183	GATAD2A	LGALS3	FOSL2	KCMF1	MBNL1	IHH	FZD5	FAM78A	SMAD7		MIR1244-2	SARDH		2015-09-09	PBX1	NRP1	GRAMD3
IER2	KIAA0182	IFNK	GAS7	FAM49B	FAM53B	ELL	TMBIM1	SMAP2	LOC100507217	STK40	JMJD1C			MIR142	PPP2R5C	MRPL1	SPTBN1	JARID2	GNB2L1	KIAA0182	ST3GAL1		METTL11A	KLHL38	LRP5	FAM49A	JUNB				MBP	GPR56	GATSL3	LGALS4	FOXA1	KDM6B	MBP	ING1	GAB1	FAM84B	SMAP2		MIR1252	SCGN		SET	PC	OAF	GRHL3
IER3	KIAA0247	IGSF11	GATM	FAM53B	FAM65A	ELL2	TMCC2	SMARCA2	LOC541471	TAGAP	JUNB			MIR21	PRKCH	MTIF3	ST3GAL1	KCNA3	GNG2	KIAA1949	STIM2		MGAT1	LDB3	LRRFIP1	FAM49B	KDM4B				MCL1	GPR65	GGA1	LIF	FOXD2	KIAA0182	MCTP2	IRF1	GADD45A	FBXL14	SNORA14B		MIR1257	SCHIP1		SFN	PCSK1	OSR1	GSK3B
INHBA	KIAA0754	IL18BP	GEMIN8P4	FAM5B	FAM83D	ELMO1	TMEM184B	SPEN	LOC644714	TAOK3	KBTBD2			MIR23A	PRPF38B	MYH9	STAT1	KIAA0247	GNPDA1	KLF13	STK10		MIR1284	LDHD	LTBP1	FAM53B	KDM4C				MED15	GPR68	GGPS1	LITAF	FOXK2	KIAA0284	MDM4	IRF2BP2	GALNT4	FCHSD2	SNORD54		MIR1284	SCRT2		SH2D6	PDE3A	PALMD	GSN
IRF2BP2	KIAA0895	INPP5A	GLIPR2	FBXO32	FBXW4P1	ENDOD1	TMEM53	SPTBN1	LOC648987	TARS	KDM2B			MIR3188	PRR7	MYL12B	STAT5B	KIAA0922	GPR132	KLF2	STK17A		MIR190	LGALS9	MALAT1	FAM65B	KDM6B				MEF2D	GPRIN3	GIMAP2	LMNA	FOXP1	KIAA0664	MED9	IRS1	GATA6	FEZ1	SNRK		MIR1297	SEMA6D		SHH	PDE4D	PAQR8	HAS2
IRS2	KIF13A	IPO13	GLT25D2	FBXO7	FEZ1	ENPP2	TOB1	ST3GAL1	LOC652276	TBCC	KIAA0182			MIR3194	PRSS1	NAB2	STK10	KIAA1267	GPR15	KLF6	STK17B		MIR21	LGI4	MAMDC2	FAM78A	KIAA0125				MGC39372	GRB7	GIMAP5	LOC100131060	FOXP2	KIAA1522	MGAT4A	ITGA6	GBP3	FGFR1	SPRED2		MIR135B	SEPN1		SIPA1	PGPEP1L	PARN	HDGF
ITGA3	KILLIN	IQCK	GLTP	FCHO1	FGF1	EPCAM	TPCN1	ST8SIA4	LOC729176	TBL1XR1	KIAA0247			MIR548Z	PSMB8	NBR1	STK17B	KLF13	GPR183	KLF9	STX16		MIR23B	LMNA	MAP3K14	FAR1	KIAA0247				MIDN	GRK5	GIMAP8	LOC100131496	FRAT2	KIAA1530	MIR137	ITGB1	GCNT1	FGFR4	SPTBN1		MIR2113	SERPINF1		SLC16A5	PHF15	PDHX	HERC3
ITGB1	KLF11	IQSEC1	GNAI2	FEZ1	FGFR2	ETV5	TPPP	ST8SIA6	LOC729178	TGFBRAP1	KIAA0748			MYADM	PTMA	NCK2	STK4	KLF6	GPR25	KLHL21	SYNE2		MIR326	LMOD2	MAP7D1	FAR2	KIAA0922				MIR1260B	GZMB	GIT1	LOC100134229	FUT6	KIAA1671	MIR142	ITGB5	GCNT2	FILIP1L	STAT5A		MIR302B	SH2D6		SLC16A6	PHLDA3	PEG10	HIF1A
ITPRIP	KLF6	IRAK2	GNG7	FGD4	FKBP5	ETV6	TRIM8	STAT5A	LPIN2	TMEM140	KIAA0922			MYH9	PTPN6	NDFIP1	STK40	KLF9	GPR65	KLRK1	TAGLN2		MIR4269	LOC100129046	MAPK4	FARS2	KLF13				MIR1284	H3F3B	GNAI2	LOC100289255	FXYD3	KLF10	MIR153-2	ITPK1-AS1	GCOM1	FLI1	STIM1		MIR3607	SIPA1L3		SLC35E2B	PHYHIP	PEX13	HIP1R
JARID2	KLF9	IRF2BP2	GPM6B	FGF1	FLII	EVI5L	TSSC4	STK40	LPXN	TMEM43	KLF13			N4BP1	PTPRC	NDUFV2	SYF2	KRTAP19-8	GPR68	KRAS	TBCC		MIR4316	LOC100129316	MAPKAP1	FBXL5	KLF2				MIR142	HCST	GNG2	LOC100499467	FZD5	KLF13	MIR181A1	IWS1	GDA	FLJ13197	STK17B		MIR3668	SLC17A6		SLC38A2	PICALM	PHF15	HIPK2
KANK1	LAMA4	ITPK1-AS1	GPR3	FGFR2	FLJ32224	FA2H	TTYH1	STX11	LRBA	TNRC18	KLF2			NCK2	PVRIG	NFKBIA	TAGAP	LBH	GPRIN3	LAPTM5	TCF7		MIR548Z	LOC100129726	MBNL1	FCGR3A	KLF6				MIR2276	HDAC7	GNN	LOC146880	GADD45B	KLF16	MIR3658	JUP	GEMIN7	FLJ14107	TAGAP		MIR371	SLC1A7		SLC4A3	PITX1	PHYHIPL	HMCN1
KDM6B	LAMB1	ITPKB	GPR56	FKBP5	FLJ37543	FABP3	UBC	TAGLN2	LRRC33	TOPORS	KLF6			NCRNA00152	RAC2	NLRC5	TBC1D22A	LCP1	GRAP2	LCP1	TGFBR2		MIR612	LOC100130581	MBNL2	FCGR3B	KLF9				MIR23A	HEATR2	GNS	LOC282997	GAL3ST2	KLF4	MIR3922	KALRN	GK	FLJ35946	TARP		MIR3914-1	SLC38A8		SMAD3	PKM2	PIK3CB	HMGA2
KIAA0754	LAMC1	KANK1	GPRC5B	FLII	FLJ42627	FAIM2	USP2	TAOK3	LRRC70	TOX	KLF9			NCRNA00239	RALGDS	NR1D1	TBC1D2B	LCP2	GRB7	LCP2	TGIF1		MLXIP	LOC100188947	MCFD2	FFAR2	LAPTM5				MIR3188	HIPK1	GPR132	LOC388906	GAPDH	KLF5	MIR4269	KIAA0247	GLRX	FLNB	TBC1D19		MIR489	SLC7A14		SMURF2	PLB1	PIK3R1	HPS5
KIAA1217	LAPTM4A	KCNB1	GRAMD3	FLJ13197	FLJ42875	FAM102A	WASF2	TAPT1	LRRC8B	TRA2B	LBH			NDUFV2	RAPGEF1	NR4A2	TBCC	LDLRAP1	H3F3B	LDLR	TMEM50A		MNT	LOC100216545	MCTP2	FGD2	LFNG				MIR548Z	HIVEP2	GPR174	LOC440926	GAS6	KLF6	MIR4316	KIAA1161	GLS	FLNC	TBC1D2B		MIR512-2	SND1		SNORD68	PLEC	PION	HSD17B2
KIRREL	LARP1	KCTD7	GRIN2C	FLJ27354	FLRT1	FAM123A	WDR20	TBL1XR1	LRRC8D	TSPAN2	LCP1			NEAT1	RARA	ORAI2	TCF7	LEF1	HDAC7	LMNA	TMSB4X		MRPL37	LOC100507217	MDM1	FGD4	LOC100128164				MIR568	HIVEP3	GPR56	LOC643008	GATA6	KLF9	MIR802	KIAA1324	GNA11	FLRT2	TC2N		MIR581	SNORD62B		SOCS3	PLEKHA2	PLEKHM3	HSD17B7
KLF12	LGALS3	KIAA0415	GRLF1	FLJ32224	FMNL2	FAM124A	YPEL2	TGFBRAP1	LRRFIP1	UQCRH	LCP2			NEK7	RARG	OXNAD1	TGFBR2	LIMS1	HECA	LOC100129387	TPP2		MSL1	LOC100526820	ME3	FGFR1OP2	LOC100129726				MKNK2	HLA-B	GPR65	LOC723809	GEMIN7	KRT19	MME	KIF13B	GNG12	FNDC3B	TCF7		MIR596	SP3		SOCS6	PLEKHH3	PPAP2B	HSF2BP
KLF6	LHFPL2	KIAA0556	GRM3	FLJ37543	FNBP1	FAM125B	ZBTB16	TGIF1	LYN	USP25	LDHA			NFATC2	RASA3	PACS1	TGIF1	LNPEP	HIPK1	LOC100130581	TRAF1		MSN	LOC148696	MEF2D	FGR	LOC100130298				MTIF3	HLA-C	GPR68	LOC728264	GLRX	KRT8	MOBKL2A	KIFC3	GPR124	FOS	TGFBR2		MMRN2	SPDEF		SP1	PLLP	PPARGC1A	HTR1D
KLF7	LIMS1	KIAA0895	GSN	FLJ42875	FOSB	FAM131B	ZBTB7B	TM7SF3	MACF1	VIM	LDLR			NLRC5	RASSF2	PAQR8	TMEM66	LOC100128542	HIVEP2	LOC100131434	TRIB1		MST1P9	LOC200261	MEIS1	FHAD1	LOC100130581				MYH9	HLA-DRB1	GPRIN3	LOC730227	GLYCTK	LEFTY1	MSI2	KLF13	GPR128	FOSB	TMEM66		MOG	SREBF1		SPC24	PODXL	PPM1H	HTR7
KLF9	LIPE	KIAA1598	HDAC11	FLJ43663	FOXO3	FAM134B	ZCCHC24	TMEM140	MALAT1	VPS37B	LDLRAP1			NTRK1	RASSF5	PDCD4	TMSB4X	LOC100129387	HK1	LOC100132356	TRIM8		MTHFR	LOC255130	MEIS2	FIGNL1	LOC100134229				NAIF1	HMOX2	GRAP2	LRP5	GNA11	LENG9	MTIF3	KLF5	GPR56	FOSL2	TMSB4X		MSH6	SSBP3		SPEN	POLD4	PPP1R10	HUS1
KRT23	LNPEP	KIAA1737	HDGF	FLRT1	FRMD4A	FAM13C	ZDHHC11	TMEM43	MAML3	WHSC1L1	LIMS1			ODF3B	RBM39	PDE4B	TNF	LOC100133991	HLA-A	LOC100216545	TSC22D3		MTSS1L	LOC283335	METTL14	FKBP5	LOC100233209				NCK2	HNRNPA2B1	GVINP1	LRP5L	GNAI2	LETM1	MYB	KLF6	GPRC5A	FOXJ2	TNFAIP3		MSL2	ST18		SPRY4	PPP1R15B	PPP4C	IER2
KRT39	LOC100129046	KIF13B	HERPUD2	FMNL2	FRMD4B	FAM178B	ZEB2	TNFRSF1A	MAN1A1	WIPF1	LMNA			OGDH	RCAN3	PDE7A	TNFAIP8	LOC100233209	HMGA1	LOC100507217	TSPAN14		MTUS1	LOC284751	MICAL2	FLI1	LOC100289230				NCRNA00152	HNRNPF	GYPC	LRRC43	GNB1	LFNG	NCRNA00152	KRT18	GRK5	FOXN3	TNFAIP8		MSRA	STAT5B		SREBF1	PPP4C	PPP4R2	IER3
KRT80	LOC100129726	KIF1B	HEXIM2	FNBP1	FSCN1	FAM192A	ZFP36	TNIP1	MAPK1	WRNIP1	LOC100130581			ORAI2	RHOG	PHF15	TNFRSF1B	LOC149950	HNRNPC	LOC200261	TTC9		MYH11	LOC285419	MICALCL	FNBP1	LOC100507217				NCRNA00239	HNRNPH1	GZF1	LRRFIP1	GP9	LGALS3	NCRNA00184	KRT8	GSN	FSCN1	TNFRSF1A		MTA3	STEAP3		SSFA2	PRSS23	PROX1	IFFO2
LAMC1	LOC100133985	KLF13	HEY2	FOLH1	FTH1	FAM49A	ZHX3	TRDMT1	MAPK14	XBP1	LOC100132354			OXNAD1	RHOH	PHF20	TNIP1	LOC541471	HNRNPF	LOC282997	UBE2E3		MYH9	LOC400931	MICALL1	FNDC3B	LOC115110				NDUFV2	HNRNPL	GZMH	LY86	GPER	LGALS4	NCRNA00221	L3MBTL3	GTF2IRD1	FSTL1	TNFRSF21		MYB	STXBP1		SSH1	PTGES	PTK7	IFNGR2
LARP6	LOC100188949	KLF9	HHATL	FOXN2	FXYD3	FAM49B	ZMYND8	TXNIP	MAPK8	XYLT1	LOC100216545			PCBP1	RICTOR	PIK3IP1	TRAF1	LOC646329	HNRNPL	LOC338799	UBQLN1		MYL6	LOC541471	MIR1272	FNIP2	LOC150992				NEK7	HRASLS2	H3F3B	MALL	GPR153	LIF	NCRNA00226	LAMB3	HBP1	FTH1	TOP1		MYCNOS	SULF2		STK39	PTMA	RAB4A	IGF1R
LCLAT1	LOC100216545	KLHL32	HIPK2	FOXO3	GAB1	FAM53B	ZYX	UBAP2L	MAPKAPK3	YY1AP1	LOC100289230			PHF20	RORA	PIP4K2A	TRAF3IP3	LOC727896	HNRPDL	LOC400927	UCP2		MYLK	LOC646329	MIR1276	FOS	LOC282997				NFATC1	HSPA8	HCLS1	MAP2K3	GPR39	LMNA	NDFIP2	LDLR	HDGF	FYN	TRAF1		MYF5	SUMO1P1		STK40	PTPN1	RAPGEF5	IGF2BP2
LGALS3	LOC148696	LARP6	HMBOX1	FRMD4A	GAB2	FAM65A		UBC	MAPRE2	ZC3H4	LOC100507217			PIK3IP1	RPS27A	PITPNC1	TRIM8	LOC730227	HSPA8	LOC400960	USP20		MYOF	LOC646903	MIR1284	FOSB	LOC338758				NFKB1	HTRA4	HCST	MAP3K14	GPR56	LOC100216545	NDUFA10	LEKR1	HDHD3	FZD4	TRIM14		MYO3B	SUN1		STMN3	PTPRJ	RASSF10	IL1RAP
LHFPL2	LOC158376	LDLRAP1	HMOX2	FRMD4B	GADD45B	FAN1		UNK	MBNL1	ZEB2	LOC149950			PIP4K2A	RUNX3	PLCG1	TSPAN14	LOC91450	ID2	LOC401242	USP3		NAV2	LOC653513	MIR190	FOSL2	LOC400958				NLRC5	ICAM2	HECA	MARK2	GPRC5A	LOC113230	NEAT1	LGALS3	HES1	GAPDH	TRIM8		MYOF	SUN2		SUSD2	PTTG1IP	RBPMS	IL4R
LIF	LOC283335	LIG3	HRH2	FRMD5	GAL3ST1	FBXO32		UQCRH	MBP	ZFP36	LOC200261			PITPNC1	SELPLG	PNRC2	TSSK6	LRIG1	IER2	LOC541471	VIM		NBN	LOC730227	MIR21	FOXK1	LOC400960				NR1D1	ID2	HIPK1	MCL1	GPSM3	LOC146880	NEIL3	LGALS9	HIC1	GAS1	TRYX3		N4BP3	SYT13		SUZ12P	RAB10	RELL1	INPP4B
LIMS1	LOC284751	LIMCH1	HS1BP3	FRYL	GALNT6	FBXW4P1		VAMP5	MDM1	ZMIZ1	LOC282997			PLEKHF1	SEMA4D	PPP1R15B	TTC39C	LRRC33	IER5	LOC646329	WIPF1		NCRNA00152	LPP	MIR326	FOXN2	LOC440926				NTRK1	IER2	HIVEP2	MEF2D	GRAMD4	LOC282997	NEK7	LIMA1	HIF3A	GAS7	TSHR		NANOG	TARBP1		SYNJ2	RAB31	RERE	INSIG2
LMNA	LOC388942	LINGO1	HSP90AA1	FSCN1	GAPDH	FCHO1		VPS37B	MDM4	ZMYND8	LOC339894			PPP1R15A	2015-09-09	PPP2R5C	TUBA4B	LRRC8C	IFFO2	LOC648987	ZBTB25		NDUFS2	LRRC14B	MIR3935	FOXO3	LOC541471				NUP210	IFI6	HIVEP3	METRNL	GSN	LOC285074	NR2C2	LIMK2	HINT3	GBF1	TSSK6		NAV2	TBC1D24		SYTL1	RAPGEF3	RGNEF	IQGAP1
LOC100129046	LOC400548	LIPA	HSPB1	FTH1	GAS7	FEM1B		WIPF1	MED12L	ZNF217	LOC401109			PPP2R5C	SH2B3	PRKCH	UCP2	LRRFIP1	IFITM1	LOC653513	ZC3H12A		NDUFS5	LRRC32	MIR4257	FRAT1	LOC648987				OGDH	IFITM1	HLA-C	METTL2B	GTF2IRD1	LOC338799	NSMAF	LMNA	HIST2H2BC	GFPT1	TTK		NCOR2	TCF4		TACC3	RARA	RHBG	IRAK2
LOC100134259	LOC401233	LIPE	HTRA1	FUT8	GIT1	FEZ1		WRNIP1	MED15	ZNF267	LOC401242			PRDM1	SH3BGRL3	PRPF38B	USP20	LY9	IFNAR2	LOC727896	ZC3H4		NDUFV2	LRRFIP1	MIR4269	FSCN1	LOC723809				OR4N3P	IFNAR2	HLA-F	MGLL	HES1	LOC388906	NUP210	LMO7	HKDC1	GLIPR2	TXNIP		NCRNA00093	TGFB3		TCF7L2	REREP3	RHOBTB1	IRF2BP2
LOC100216001	LOC541471	LMNA	ID3	FXYD4	GLIPR2	FGF1		XBP1	MEF2C	ZNF445	LOC541471			PREX1	SKI	PTGER4	VIM	LYST	IKZF1	LOC729176	ZFP36		NEDD9	MAF	MIR4316	FTH1	LOC727677				ORAI2	IGF2R	HMBOX1	MICAL2	HIC1	LOC400236	OR4N3P	LOC100131060	HMGCS2	GLT25D2	UBASH3B		NCRNA00152	TLE3		TEAD3	RHOB	RHPN2	IRS2
LOC100216545	LOC646329	LOC100130148	IDH2	FYN	GLRX	FGFR2		XPNPEP3	MEF2D	ZNF521	LOC644714			PRKCH	SLA	PTK2B	WDR1	MACF1	IL10RA	LOC729178	ZFP36L1		NEK6	MAFA	MIR548Z	FXYD2	LOC727896				OSTCL	IKZF1	HMOX2	MICALL2	HNF1B	LOC401233	OXNAD1	LOC100131366	HNF4G	GLTSCR2	UBC		NDST1	TMEM121		TGFBR2	RPS16	RMI1	IRX4
LOC100268168	LOC728264	LOC100130855	IFFO2	GAB1	GLT25D2	FKBP5		YWHAG	MEIS1		LOC645158			PRKCQ	SLAMF1	PTPRC	WDR37	MAL	IL16	LPAR5	ZFP36L2		NFIA	MALAT1	MIR604	FYB	LOC730227				OXNAD1	IKZF2	HNRNPA2B1	MIR1284	HOOK2	LOC440926	PAFAH2	LOC100131496	HNRNPF	GMPR	UBE2J1		NEBL	TMEM132E		TMEM17	RREB1	RNASE8	ITGA2
LOC100288428	LPL	LOC100131496	IFIT3	GAB2	GLTP	FLJ13197		YWHAZ	MGAT1		LOC646329			PRPF38B	SLC6A6	PTTG1IP	WHSC1L1	MALAT1	IL17A	LPXN	ZNF217		NFIC	MAP7D1	MIR938	FYN	LONRF1				PATL2	IL10RA	HNRNPC	MIR196A1	HRASLS2	LOC440944	PAG1	LOC100303728	HOOK2	GNAI2	UQCRFS1		NEDD4L	TMEM188		TNFSF4	RXRA	ROCK2	ITGA6
LOC100499467	LRIG1	LOC100132707	IFNK	GALNT6	GNAI2	FLJ32224		ZC3H4	MGLL		LOC729176			PSTPIP1	SLMO2	PVRIG	WIPF1	MALT1	IL19	LRRC8D	ZNF831		NFIX	MAPKAPK2	MNT	GAB2	LPCAT1				PBX4	IL16	HNRNPF	MIR21	HSD11B2	LOC730227	PDE4DIP	LOC100499467	HS1BP3	GNAI3	USP20		NMUR1	TMEM90A		TNRC18	S100A10	RPS6KA3	ITGB1
LOC152742	LRP1	LOC100289473	IGSF11	GAPDH	GNAZ	FLJ37543		ZFP36	MIER1		LPIN2			PTGER4	SMAD3	RASA3	WNT10A	MAP3K14	IL1R1	LRRFIP1			NFKBIA	MAPKAPK3	MRGPRF	GALNT2	LPP				PCBP1	IL17C	HNRNPH1	MIR23A	HSPA1B	LOC730668	PELI2	LOC282997	HSPC159	GNAS	USP24		NOL11	TMEM90B		TNS4	S100A11	RPSAP52	ITGB6
LOC255130	LRRC32	LOC100498859	IGSF22	GAS7	GNG7	FLJ41941		ZFP36L2	MIR1284		LRRC8B			PTK2B	SNX20	RASGRP1	XPO6	MAP3K8	IL2RA	LYST			NR2F2	MAPRE2	MRPL35	GAS7	LPXN				PDE4B	IL2RB	HNRNPK	MIR3127	HSPG2	LRP5	PELO	LOC284751	HSPG2	GNG2	UXS1		NPY	TNRC18		TOP1	S100A2	RREB1	ITGB8
LOC338588	LRRC8B	LOC100507217	INF2	GATM	GOLT1A	FLJ42392		ZMIZ1	MIR21		LRRC8D			PTMA	SOCS3	RASSF5	ZBTB7B	MAP7D1	IL2RB	MALAT1			NR4A1	MAT2A	MRVI1	GATAD2A	LRRC33				PIK3R1	IL32	HNRNPL	MIR326	ID1	LRP5L	PEX5L	LOC285419	ID1	GPANK1	VOPP1		NR5A1	TRAF3IP2		TRIB1	SCAND1	RRM2	ITPRIP
LOC339894	LRRFIP1	LOC100526820	INPP5A	GIT1	GPD1	FLJ43663		ZMYND8	MIR222		LRRFIP1			PTPN6	SPEN	RBM14-RBM4	ZC3H7A	MAPKAPK2	IL32	MAP7D1			NRP2	MB	MSN	GCNT1	LRRFIP1				PILRB	INPP4A	HNRNPU	MIR3646	ID2	LRRFIP1	PFKP	LOC285740	ID2	GPR116	XBP1		NRP2	TRIO		TRIM8	SDC4	RSPRY1	JAG1
LOC399959	LY86-AS1	LOC145663	IPO13	GLDN	GPR3	FLRT1		ZNF217	MIR223		LSR			PTPRC	SPOCK2	RBM39	ZC3HAV1	MAPRE2	IL4I1	MAPRE2			OBFC1	MBP	MST1P9	GGA2	LSR				PIP4K2A	INPP5D	HRASLS2	MIR638	ID3	LTBP4	PIK3R1	LOC338758	ID3	GPR124	ZAK		NUAK2	TSHR		TRIOBP	SET	RTKN	KANK1
LOC400931	LYL1	LOC148696	IQCK	GLIPR2	GPR37L1	FMNL2		ZNF267	MIR3162		M6PR			PTPRE	SPTBN1	RCAN3	ZDHHC18	MBP	IL6R	MBNL1			OGDH	MDM4	MTSS1L	GIT1	LYN				PITPNC1	IQGAP1	HSPA8	MIR648	IER2	MAGI3	PIK3R6	LOC339894	IER5L	GPR135	ZFP36L1		OLFML3	TSPAN18		TRNP1	SGK1	SAMD4A	KCNJ15
LOC440028	LYRM1	LOC283335	IQSEC1	GLT25D2	GPR56	FNBP1		ZNF521	MIR326		MACF1			PTPRJ	STAT5B	RGS10	ZFP36L2	MCL1	IL7R	MBP			P2RY14	MEF2D	MXI1	GLIPR2	LYST				PLCG1	IQSEC1	ICAM2	MKNK2	IER3	MALAT1	PIM1	LOC400550	IFIT3	GPR3	ZFP36L2		OTX2OS1	TSPAN9		TUBB3	SH2D6	SCN1A	KCTD1
LOC541471	MACF1	LOC283999	IRF1	GLTP	GPR84	FOXK2			MPP1		MALAT1			PVRIG	STK10	RHOH	ZNF217	MDM4	ING1	MCL1			PACSIN2	MGAT1	MYH11	GLRX	MALAT1				PLEC	IRAK2	IER2	MKRN1	IFITM3	MAP2K3	PLCB1	LOC442497	IFNAR2	GPR84	ZNF217		PABPC4L	TTC30A		UBC	SH3TC2	SDPR	KCTD4
LOC642852	MAGI1	LOC285796	IRF2	GLTSCR1	GPRC5B	FOXO3			MSI2		MAP3K14			RAB27A	STK17B	RNASET2	ZNF267	MDS2	INPP4A	MDM4			PALLD	MIR133A2	MYH9	GNA12	MAP2K3				PLEKHF1	IRF1	IFITM1	MLKL	IHH	MAPK6	PLXND1	LOC647323	IFNGR1	GRK5	ZNF750		PBX1	TTC32		UBTF	SHB	SEC31A	KIAA0146
LOC645434	MAOA	LOC286094	IRF2BP2	GNA14	GPRC5C	FRMD4A			MSL2		MAP7D1			RAC2	SUN5	SAMHD1	ZNF831	MED15	INPP4B	MED15			PARVA	MIR196A2	MYLK	GNA13	MAP3K1				PPP1CB	IRF2BP2	IFNAR2	MLPH	IL6R	MCF2L	PRDM8	LPGAT1	IGF2BP1	GSN			PCCA	TUBA1A		UCA1	SIK1	SERGEF	KIRREL
LOC646324	MAP2K1	LOC338799	ITGB4	GNAI1	GPT2	FRMD4B			MSMB		MARK2			RALGDS	SYNGAP1	SATB1	ZSCAN16	MFHAS1	INPP5D	MICALCL			PBX1	MIR21	MYOCD	GNAI2	MAP3K5				PPP1R15A	ISG20	IKZF1	MMP23A	ILVBL	MCL1	PRKCH	LPIN2	IHH	GTPBP2			PCDH1	UMODL1		UQCR11	SLC25A37	SH3BP4	KLF4
LOC646329	MAP3K8	LOC386597	ITM2C	GNAI2	GRAMD3	FSCN1			MTIF3		MASTL			RAPGEF1	SYTL3	SCML4		MGAT1	INSIG1	MIER1			PCBP1	MIR2278	MYOF	GNAQ	MAP3K8				PPP2R5C	ITGA5	IKZF3	MPRIP	IMPA2	MDM4	PRKCQ	LRIG3	IKZF4	H19			PCDH11X	UNCX		VGF	SLC38A2	SH3YL1	KLF5
LOC648987	MAP4K3	LOC399959	ITPK1-AS1	GNAZ	GRB10	FTH1			MTPN		MBNL1			RARA	TAGLN2	SELPLG		MGAT5	IQSEC1	MIR1260B			PCDH1	MIR3128	NAGLU	GNAT2	MAP4K4				PRKCH	ITGB2	IL10RA	MSL1	IQSEC1	MEF2D	PRMT7	LRP5	IL17RE	H3F3B			PELI1	UQCRFS1		VTI1A	SLC45A1	SHROOM1	KLF6
LOC728264	MAPKAPK2	LOC400238	ITPKB	GNG7	GRHPR	FXYD4			MYB		MBP			RASA2	TBC1D2B	SEMA4D		MIAT	ISG20	MIR142			PDE4DIP	MIR4257	NAV2	GNG7	MAPK13				PRKCQ	ITPKB	IL16	MTVR2	IRF1	MESP2	PSAP	LRRC1	IL34	HAAO			PHC1	VAV3		WASF2	SLC9A8	SIAH2	KLF7
LOC728460	MBNL2	LOC645323	ITPRIP	GOLGA7	GRID1	FXYD6			MYCT1		MCM3			RASA3	TBCC	2015-09-06		MIR1206	ITGB1	MIR21			PDLIM1	MIR4269	NBLA00301	GNLY	MAPK8IP3				PSTPIP1	ITPRIP	IL17C	MUC12	IRF2	METRNL	PSMA6	LRRFIP1	IPMK	HABP2			PHF17	VEGFA		WIPI1	SLFN5	SKINTL	KLHL21
LOC730668	MCAM	LOC653513	JARID2	GPM6B	GSN	FYN			MYH9		MDM4			RASSF5	TCF7	2015-09-09		MIR1208	ITGB2	MIR223			PDZRN3	MIR486	NCOR2	GPCPD1	MAST3				PTK2B	JUNB	IL2RB	MUC2	IRF2BP2	MICALL2	PSMD7	LSM4	IRF1	HDAC5			PHLPP1	VPS37C		ZFP36	SMAD2	SLC11A2	KPNA7
LOX	MCFD2	LOC730227	KANK1	GPR3	GUK1	GAB1			MYO18A		MED15			RBM38	TGIF1	SERINC5		MIR1260B	ITPKB	MIR2276			PER1	MIR548AA1	NCS1	GPR141	MBP				PTP4A2	KBTBD2	IL7R	MUC4	ISG20	MIR1225	PTEN	LY86-AS1	ITGA6	HDAC7			PHTF2	VWA1		ZFP36L1	SMAD3	SLC22A25	KRR1
LOXL1	MDFIC	LOC90784	KBTBD11	GPR56	HCN2	GAB2			NAA50		MEF2D			RHOF	TMBIM1	SH2B3		MIR1284	JAK1	MIR23A			PEX26	MIR548J	NDUFS5	GPR65	MCL1				PTPN6	KDM6B	ILK	MYEOV	ITGA6	MIR193A	PTGER4	LYRM1	ITGB1	HEXIM1			PIF1	WASF2		ZIC5	SMAD6	SLC2A1	KRT19
LPP	MEF2D	LRIG1	KCTD7	GPRC5B	HDAC11	GALNT6			NCAM2		METTL11A			RHOG	TMEM50A	SIPA1		MIR3175	JARID2	MIR3128			PHLDA3	MIR648	NFIC	GRAMD4	MED16				PTPRC	KIAA0182	INPP4A	MYH14	ITM2C	MIR196A1	PTP4A2	MACC1	ITGB5	HFE2			PIK3C3	WBSCR17		ZNF213	SMOC1	SLC2A2	KRT23
LRRFIP1	MGAT1	LRRC4	KIAA0247	GPT2	HDAC4	GAPDH			NCOA4		MGAT1			RHOH	TMEM66	SIRPG		MIR3194	JOSD1	MIR3162			PIGV	MLXIP	NFIX	GRB2	MEF2C				RAB27A	KIAA0247	INPP5D	MYH9	ITPK1	MIR200B	PTPN2	MAF	ITPK1	HIC1			PIM1	WNT4		ZNF503	SMOX	SLC35D2	KRT39
LRRFIP2	MGC15885	LRRC8A	KIAA0319L	GRAMD3	HDAC5	GAS7			NCOA7		MIA3			RORA	TMSB4X	SKI		MIR548Z	JUN	MIR3652			PIK3R1	MN1	NID2	H2AFY	MEF2D				RAC2	KIAA0922	IQGAP1	MYL6B	ITPKA	MIR200C	PTPN3	MAFF	JOSD1	HIF3A			PIPOX	XKR7		ZNF750	SMU1	SLC39A14	KRT5
LRTM1	MGLL	LRRTM2	KIAA0556	GRID1	HEPACAM	GATM			NCRNA00152		MIER1			RUNX3	TNFAIP3	SLA		MIR568	JUNB	MIR548Z			PITRM1	MNT	NKD1	HCST	MGAT5				RALGDS	KLF13	IQSEC1	MYO1E	ITPKC	MIR23A	PTPRC	MALAT1	JUP	HIST1H2AK			PLEKHM3	YPEL2		ZNF778	SNORA14B	SLC7A6	KRT7
LTBP1	MIR1260B	LRTM2	KIAA1147	GRLF1	HERPUD2	GGT5			NCRUPAR		MIR101-1			SAMHD1	TNFAIP8	SLAMF1		MIR612	KAT2B	MKNK2			PKDCC	MTHFR	NMNAT2	HDAC7	MGC39372				RAPGEF1	KLF2	IRF1	NCOR2	ITPR3	MIR3128	PTPRO	MALL	KALRN	HIST1H2BD			PLS3	ZBTB20			SNORA80B	SMARCA1	KRT75
LTBP2	MIR1265	LZTS2	KIAA1244	GRM3	HHATL	GIT1			NDUFV2		MIR1260B			SBDS	TNFRSF1B	SLC38A1		MIR766	KDM6B	MLXIP			PLEKHA2	MTSS1L	NMUR1	HIATL1	MICAL1				RARA	KLF6	ISG20	NCRNA00093	JUN	MIR3188	RAB20	MAML3	KCNK5	HIST1H3C			PODXL	ZDHHC8P1			SOCS3	SMOX	LAMA3
LZTS2	MIR1276	MACF1	KIAA1274	GSN	HIPK2	GLIPR2			NEK7		MIR1284			SBDSP1	TNIP1	SLFN5		MLL5	KIAA0247	MMP23A			PLEKHO1	MTTP	NR2F2	HIPK1	MICAL3				RARG	KLF9	ITGA4	NCRNA00235	JUP	MIR574	RAD21	MANBAL	KIAA0247	HIST1H3H			POU5F1	ZHX2			SOCS6	SNHG1	LAMB3
MACF1	MIR196B	MAL	KIAA1598	GTF2IRD1	HMBOX1	GLT25D2			NET1		MIR21			SELPLG	TRAF1	SMAP2		MRPL1	KIAA0748	MNT			PLEKHO2	MTUS1	NR4A1	HIPK2	MIDN				RASA2	KLHL25	ITGA5	NDST1	KAZALD1	MIR638	RAG1	MAP3K13	KIFC3	HIST2H2BC			PPAP2B	ZNF337			SOX13	SNORA59A	LAMC2
MAFF	MIR21	MALAT1	KIAA1737	HDAC11	HMOX2	GLTP			NFATC2		MIR223			SEMA4D	TSC22D3	SMPD1		MSN	KIAA1267	MOBKL2A			PLXND1	MUSTN1	NR4A2	HIPK3	MIR1244-2				RASA3	KLRD1	ITGB2	NEK6	KCNK5	MIR937	RAPGEF5	MARK2	KLF13	HIVEP2			PPM1B	ZNF536			SPIRE2	SNORD17	LAPTM4A
MAFK	MIR3129	MAN2A1	KLF13	HDAC4	HNRNPF	GLTSCR1			NFE2		MIR2276			2015-09-09	TSPAN14	SNRK		MYH9	KIAA1949	MORN3			POLD3	MYBPC1	NRP2	HIVEP3	MIR1260B				RASSF5	LAPTM5	ITPKB	NEURL1B	KCTD5	MKNK2	RBM33	MAT2B	KLF5	HMG20A			PPM1J	ZNRF3			SPTBN1	SNORD65	LDHA
MALAT1	MIR326	MAP1A	KLF9	HEPACAM	HPN	GNAI1			NFYA		MIR23A			SH2B3	TSSK6	SORL1		MYL12B	KLF13	MPP1			POPDC2	MYH2	NT5DC3	HK1	MIR1284				RFX1	LASP1	ITPRIP	NFKBIA	KDM6B	MMP23A	RCBTB2	MAX	KLF6	HMGN4			PPP1R2P3				SREBF1	SNTB1	LDLR
MAP7D1	MIR365-2	MAP1B	KREMEN1	HEXIM2	HS1BP3	GNAI2			NKIRAS2		MIR3128			SH3BGRL3	TTC39C	SPEN		MYST3	KLF2	MRPL1			PPP1CB	MYH9	NUFIP1	HK2	MIR142				RHOH	LBH	JUNB	NOTCH1	KIAA0182	MNT	RCSD1	MBNL2	KLHL6	HNRNPA0			PPP1R3B				SSH1	SOCS6	LGR4
2015-03-10	MIR4279	MAP4K4	KSR1	HHATL	HS6ST1	GNAZ			NOTCH2		MIR4269			SKAP1	TXNIP	SPOCK2		NAB2	KLF6	MST1P2			PPP1R12B	MYL12A	NXN	HLA-DRB1	MIR3188				RORA	LBR	KATNAL1	NR4A1	KIAA0415	MOB2	RDH10	MCART1	KRT18	HNRNPL			PPP2R4				ST5	SPEN	LHFPL2
MARCKS	MIR641	MAP4K5	LARP6	HIPK2	HSPA1B	GNG7			NOTCH2NL		MIR4316			SKI	UBASH3A	SPTBN1		NCK2	KLF9	MTHFR			PPP1R15A	MYO18A	NXPH3	HNRNPF	MIR568				RUNX3	LCK	KBTBD2	NR4A2	KIAA1522	MPST	REPIN1	MCL1	L3MBTL3	HOXA10			PRDM14				STC1	SPIRE2	LIF
MBNL2	MMD	MAP6D1	LASP1	HMBOX1	HSPB1	GOLT1A			NPR3		MIR548Z			SLA	UBE2D3	SREBF1		NCRNA00152	LAPTM5	MYH9			PPTC7	MYO18B	PALLD	HRH2	MIR623				SEMA4D	LCP1	KCNA3	NRARP	KIAA1671	MUC1	RGS1	MEIS1	LAMB3	HOXA6			PRLR				TATDN2	SPOCK2	LIMA1
MBP	MPEG1	MAP7	LDLRAP1	HMOX2	HSPG2	GPM6B			NRIP1		MIR623			SLAMF1	UCP2	SSTR3		NCRNA00226	LASP1	MYL12B			PRR15L	MYOD1	PARP8	HSH2D	MKNK2				2015-09-09	LCP2	KIAA0247	PACSIN2	KIF13B	MUC12	RHOH	MGAT1	LASP1	HOXC6			PRODH				TBC1D2	SPOPL	LMNA
MCART1	MRAS	MAP7D1	LIG3	HRASLS2	HTRA1	GPR3			NT5C2		MLXIP			SLC16A6	USP20	ST3GAL1		NDUFV2	LBH	NAA50			PRSS8	MYOF	PARVA	HSPBAP1	MPEG1				SH2B3	LEPROTL1	KIAA0922	PAQR5	KIF26A	MUC2	RIPK4	MIR1284	LEKR1	HOXD8			PSMD7				TBL1X	SPRY1	LOC100128675
MCFD2	MSN	MARCKSL1	LIMCH1	HS1BP3	ICK	GPR37L1			NUDT3		MORN3			SLC25A26	USP3	ST6GALNAC6		NECAP1	LCK	NARF			PSMG4	MYOM3	PBX1	HVCN1	MRVI1				SH2D3C	LFNG	KLF13	PCBP1	KLF12	MUC4	RNASEH2B	MIR21	LGALS3	HPGDS			PTMA				TBX2	SPRY4	LOC100129046
MCL1	MTMR2	MAST3	LINGO1	HSPB1	ID3	GPR56			ORAI2		MPP7			SLC35E2B	WDR1	STAT1		NEDD9	LCP1	NCK2			PTGIS	MYOT	PDE4D	ID2	MS4A1				SH3BGRL3	LGMN	KLF2	PCDH1	KLF13	MUC5B	RNF144A	MIR26A1	LGALS9	HRC			PTPRG				TCF7L2	SPTLC3	LOC100130275
MED13L	MYH9	MAX	LIPA	HTRA1	IFFO2	GPR61			ORAI3		MRPL1			SLC38A1	WDR37	STAT5B		NEK7	LCP2	NCRNA00152			PTPLB	MYOZ1	PDE4DIP	IER2	MS4A7				SIRPG	LITAF	KLF6	PCK1	KLF4	MYH14	S1PR1	MIR3128	LIMA1	HS1BP3			PVRL3				TEAD1	SRSF3	LOC100216001
MED15	MYL12B	MBNL2	LMF1	ID3	IFIT2	GPR84			OTUD5		MRPL35			SLC38A2	WHSC1L1	STIM1		NFATC3	LDB1	NCRNA00184			PTRF	MYPN	PDGFC	IFI30	MTIF3				SKAP1	LOC100129387	KLF9	PDE9A	KLF5	MYH9	SASH3	MIR3165	LIMK2	HSPA8			QSER1				TGM2	SS18L1	LOC100233209
MEF2D	MYOF	MBP	LMNA	IFNK	IGSF8	GPRC5B			OXER1		MTHFR			SLC6A6	WIPF1	STK10		NFKB1	LDHA	NCRNA00239			PXN	NCRNA00120	PDK4	IFNGR1	MTSS1				SLA	LOC100130298	KLRD1	PDLIM1	KLF6	MYO1C	SDK2	MIR3175	LIPH	HSPB1			RABL5				TLK2	ST6GAL1	LOC100286793
MEIS1	NAB1	MCART1	LOC100126784	IGSF11	IL6R	GPT2			PBLD		MTPN			SLFN14	YWHAZ	STK17A		NLRC5	LFNG	NCRNA00258			RAB11FIP1	NCRNA00152	PDLIM3	IFNGR2	MYH9				SLC25A26	LOC100130581	KLRG1	PDXDC1	KLF9	MZT2A	SELL	MIR326	LLGL2	HSPG2			RAD54B				TM4SF1	STARD13	LOC100289473
MEX3B	NAV1	MCF2L	LOC100128239	ILKAP	INF2	GRAMD1B			PCF11		MYH9			SLFN5	ZBTB1	STK17B		NOTCH2	LIMS1	NDUFS5			RAB8B	NCRNA00184	PDZRN3	IKZF1	MYL4				SLC35E2B	LOC100130872-SPON2	KLRK1	PDXK	KLHL21	NADK	SELPLG	MIR3646	LMNA	IER2			RAI14				TMEM45B	STK40	LOC100422737
MGC87042	NCOA4	MCFD2	LOC100129726	INF2	INPP5A	GRAMD3			PDE4DIP		MYL12B			SMAP2	ZBTB7B	STK4		NR3C1	LMNA	NDUFV2			RAC1	NCRNA00263	PER1	IL10RA	NAB2				SLC38A1	LOC100131434	KRAS	PER1	KRT8	NAGLU	SEMA4D	MIR3649	LMO7	IER5L			RARB				TMEM49	SUB1	LOC100499467
MICAL2	NCRNA00120	MCL1	LOC100130298	INPP1	IP6K3	GRB10			PDZD8		NARF			SNX20	ZC3H12A	STX16		NR4A2	LOC100130298	NEAT1			RAD51L1	NDUFV2	PEX26	IL16	NAGK				SLC45A4	LOC100289230	LAPTM5	PER2	KRT80	NBL1	SERINC5	MIR3918	LOC100129046	IFFO2			RARG				TNFRSF1A	TAT	LOC152225
MICALCL	NCRNA00152	MEF2C	LOC100130581	INPP5A	IQCK	GRHPR			PGAP2		NCK2			SPTBN1	ZC3H12D	SUN5		OBFC1	LOC100133985	NEK7			RAI1	NEAT1	PHC2	IL17RA	NCK2				SLC6A6	LOC115110	LASP1	PEX26	LARP1	NCOR2	SFMBT2	MME	LOC100130581	IFIT2			RARRES3				TNIP1	TBC1D14	LOC285954
MIR1204	NDRG1	MEF2D	LOC100130933	IP6K2	IQSEC1	GRID1			PHF12		NCOA4			SRGN	ZC3H4	SYTL3		OGDH	LOC100216545	NET1			RAP1A	NEB	PHLDB1	IL4R	NCRNA00152				SMAD3	LOC220906	LBH	PFDN1	LASP1	NEAT1	SHISA2	MOBKL2B	LOC100131060	IFIT3			RBM26				TNS4	TBL1XR1	LOC338588
MIR1205	NDST1	MEGF10	LOC100131496	IPO13	IRAK2	GRLF1			PHF19		NCRNA00152			SRSF3	ZC3HAV1	TAGLN2		OR4N3P	LOC100233209	NFATC2			RARA	NES	PIP5K1C	IL6R	NCRNA00169				SMAD7	LOC282997	LCK	PHLDA2	LDHD	NMUR1	SKA3	MPRIP	LOC100131366	IFT122			RBPJ				TOB1	TBX2	LOC339894
MIR1208	NEDD9	MEGF9	LOC100192378	IQCK	IRF1	GSN			PHF21A		NCRNA00239			ST8SIA1	ZDHHC18	TBC1D22A		OXNAD1	LOC100507217	NFKB2			RASA2	NEXN	PITPNB	INPP5D	NDUFV2				SMAP2	LOC283888	LCP1	PIGR	LDLRAP1	NOTCH1	SLA	MRO	LOC100131496	IGF2			RBPMS				TRIB1	TBX3	LOC400804
MIR1244-2	NFIA	MFAP3L	LOC100288346	IQGAP1	IRF2	GTF2IRD1			PHKB		NDUFV2			ST8SIA4	ZFP36	TBCC		P2RY8	LOC115110	NLRC5			RBPMS	NFE2L1	PITPNM3	IPCEF1	NEAT1				SMG6	LOC400960	LCP2	PIGT	LEFTY1	NR3C2	SLAMF1	MSL1	LOC100133985	IGF2BP3			RGMA				TSC22D1	TECTB	LOC400931
MIR125B1	NFIB	MGAT3	LOC100498859	IQSEC1	IRF2BP2	HABP4			PICALM		NEAT1			STAT5B	ZFP36L1	TC2N		PAG1	LOC149950	NQO2			RERE	NFIA	PKDCC	IQGAP1	NEB				SNORD53	LOC401093	LDLR	PIM3	LENG9	NR4A1	SLC14A1	MTFP1	LOC100289255	IGF2R			RHBDL3				TSKU	TEPP	LOC400960
MIR1260B	NFIC	MGC16025	LOC100507217	IRAK2	ISG20	HDAC11			PIGV		NFATC2			STIM2	ZFP36L2	TCF7		PAQR8	LOC541471	NR1D1			RERG	NFIB	PLCG1	IQGAP2	NEK6				SORL1	LOC541471	LEF1	PLEKHA6	LETM1	NR4A2	SLC25A19	MTIF3	LOC100303728	IGFBP4			RNF113B				TXNIP	TGOLN2	LOC439949
MIR1284	NFIL3	MGLL	LOC100526820	IRF2	ITGB4	HDAC5			PIK3CG		NFATC3			STK10	ZHX2	TGFBR2		PCNX	LOC645158	NR1H2			RFX2	NFIX	PLEKHA2	IRAK3	NFATC1				SP140L	LOC645158	LITAF	PLEKHA7	LFNG	NR5A2	SLC39A10	MTMR11	LOC100499467	IGFBP5			RNF133				USP3	TJP2	LOC541471
MIR190	NFU1	MICAL2	LOC148696	IRF2BP2	ITPK1-AS1	HDGF			PIK3R1		NLRC5			STK17A	ZNF217	TMBIM1		PDE4B	LOC646329	NR3C1			RGMA	NNMT	PLEKHG2	IRF2	NFKBIA				SPEN	LOC648987	LOC100129387	PLEKHG3	LGALS3	NRARP	SLC39A3	MTTP	LOC151009	IL17RD			RNF138P1				USP36	TLE1	LOC554202
MIR21	NNT	MIR124-1	LOC283335	ITGB4	ITPKB	HECW2			PIM1		NR1D1			STK17B		TMEM66		PDE4DIP	LOC648987	NR4A2			RGS1	NR2F2	PLEKHO1	IRF2BP2	NIPAL4				SPTBN1	LOC653513	LOC100129534	PLXNA2	LGALS4	NRIP1	SLFN14	MTUS1	LOC282997	ILK			ROR1				UTP11L	TLK1	LOC642587
MIR222	NOTCH1	MIR1301	LOC283999	ITPK1-AS1	ITPRIP	HEPACAM			PIP4K2A		NUDT4P1			STX11		TMSB4X		PDE7A	LOC730227	NUDT4P1			RHOB	NR4A1	PLOD2	IRF5	NOTCH2				SREBF1	LOC727896	LOC100130557	POFUT1	LIMK1	NXT1	SMAD7	MUC13	LOC285419	ING1			RORA				VAMP3	TMBIM1	LOC646329
MIR2278	NOTCH2	MIR139	LOC285796	ITPKB	JAM3	HHATL			PLAC8		OGDH			SUPT3H		TNF		PIGV	LPIN2	OGDH			RNF216	NRAP	PLXNA2	IRF8	NOTCH2NL				ST3GAL1	LOC730227	LOC100133985	POLD4	LLGL2	OAZ1	SNORA59A	MXD1	LOC285629	IRF2			RORB				VDAC2	TMEM17	LOC648809
MIR23A	NOTCH2NL	MIR219-2	LOC386597	JAKMIP3	KANK1	HIPK2			PLEK		OR4D9			SYNE1		TNFAIP3		PIK3R1	LPXN	OSTCL			RREB1	OBSCN	PML	IRS1	NUDT5				STAT5B	LOC90784	LOC100133991	PPARGC1B	LMNA	OPLAH	SPP2	MYH14	LOC285740	IRF2BP2			RPSAP52				VSIG8	TMEM181	LOC723809
MIR23B	NR2F2	MIR2278	LOC399959	JARID2	KAZ	HLF			PLEKHO2		OR4N3P			SYNE2		TNFAIP8		PIP4K2A	LRIG1	OTUD5			SAP30BP	P2RY2	PPARGC1B	ITGA5	ODF3B				STK17A	LPCAT1	LOC100216545	PPP1CB	LOC100129046	OVOL1	SPRED2	MYH9	LOC339894	ITGA5			RRAS2				WASF2	TMEM189-UBE2V1	LOC727677
MIR3175	NR3C1	MIR2355	LOC400238	KANK1	KBTBD11	HMG20A			PNKD		OXNAD1			SYTL3		TNFRSF1B		PISD	LRRC33	PAN2			SCARB2	PADI2	PPIF	ITM2B	ORAI2				STK17B	LPXN	LOC100289230	PPP1R14C	LOC100130298	P4HB	SPSB1	MYO18A	LOC400238	ITGA8			RRN3P3				WDR25	TMIGD1	LOC728192
MIR3188	NRIP1	MIR3188	LOC400931	KCNJ10	KCNIP3	HMOX2			PNRC2		PBX2			TAGLN2		TOB2		PITPNC1	LRRC8C	PBXIP1			SCHIP1	PARVB	PPP1CB	ITPK1-AS1	OSTCL				STX11	LRRC33	LOC100507217	PPP1R15B	LOC100130933	PCDH1	SRFBP1	MYO1E	LOC400548	ITIH5			RRP15				WEE1	TNFRSF19	LPAR6
MIR3194	NRP1	MIR326	LOC645323	KCTD5	KCNJ10	HRH2			PPIF		PBXIP1			TBC1D2B		TRAF1		PKM2	LRRFIP1	PCF11			SDCBP2	PBX1	PPP1R12B	ITPKB	P2RX1				STX16	LRRC8A	LOC149950	PQLC1	LOC100131060	PDLIM1	SRPK2	MYOM3	LOC400960	ITPKB			RSPH3				WIPI1	TOM1	LRAT
MIR365-2	NUAK1	MIR3649	LOC652276	KCTD7	KCTD7	HS1BP3			PPP1R15A		PCF11			TBCC		TRAF3IP3		PLAC8	LSM4	PDE4DIP			SEMA4B	PCDHGC5	PPP2R1B	ITPRIP	P2RY8				SUN5	LRRFIP1	LOC401242	PRKCD	LOC100131496	PDLIM5	SSBP2	NCOA7	LOC642852	ITPKC			RTN4IP1				YWHAG	TOX3	LRIG3
MIR3658	PALM2	MIR3935	LOC653513	KIAA0415	KEAP1	HSPA9			PPP2R5C		PCM1			TC2N		TRIM69		PLCG1	MACF1	PDGFA			SERP2	PCNT	PPP2R5C	JARID2	PACSIN2				TAB2	LSR	LOC541471	PRR15L	LOC100134229	PDXK	ST8SIA4	NCRNA00093	LOC728264	ITPRIP			RTP1				ZBTB20	TPM4	LRP11
MIR4316	PALMD	MIR4269	LOC728758	KIAA0427	KIAA0247	HSPB1			PPP3R1		PDE4DIP			TCF7		TRIM8		PLEKHA4	MAF	PDIK1L			SERPINB6	PDE4B	PRELP	KCNJ15	PARP14				TAGLN2	LY9	LOC644714	PRSS8	LOC100216545	PER2	STARD3NL	NCRNA00114	LOC730227	JPH2			SALL2				ZBTB7B	TRIM24	LRRC8A
MIR661	PARVA	MIR4274	LOC730227	KIAA0556	KIAA0415	HTRA1			PRDM8		PDE7A			TGFBR2		TSPAN14		PMF1	MALAT1	PER1			SERPINH1	PDE4DIP	PRICKLE2	KDM1B	PATL2				TARP	LYAR	LOC646329	PTMA	LOC100268168	PFKL	STIM1	NCRNA00262	LPAR5	JUN			SALL4				ZBTB7C	TRIM33	LRRFIP2
MIR9-2	PBX1	MIR4312	LOH12CR1	KIAA0895	KIAA0427	ID3			PREX1		PIGV			TGIF1		TSPYL1		PPP1R10	MAP2K3	PHF19			SETBP1	PDGFB	PRIMA1	KDM3B	PAX5				TBC1D2B	LYST	LOC648987	PTPRF	LOC100288524	PFN1	STK17B	NDRG1	LPGAT1	KCNE4			SCGB3A2				ZCCHC14	TSPAN14	LYRM1
MLPH	PC	MIR575	LRIG1	KIAA1147	KIAA0556	IDH2			PROM1		PIK3CG			TIGIT		TSSK6		PPP1R16B	MAP3K1	PICALM			SH3PXD2B	PDLIM3	PRSS23	KIAA0146	PER1				TBCC	MACF1	LOC653513	PWWP2B	LOC100289255	PIGT	STT3B	NDST1	LPIN2	KCNQ1OT1			SEC23A				ZFHX3	TSSC1	LYRM4
MMP14	PCOLCE2	MIR612	LRP1	KIAA1244	KIAA0895	IER5			PTK2B		PIP4K2A			TMBIM1		TTC9		PPP1R2	MAP3K14	PIGV			SHISA4	PDLIM5	PRUNE2	KIAA0232	PGAM2				TBX21	MALAT1	LOC727896	PYGB	LOC100499467	PIM3	TAB2	NEAT1	LRP5	KCTD2			SECISBP2				ZFP36L1	TXNDC11	LYST
MMP2	PDE4DIP	MIR638	LRP4	KIAA1598	KIAA1244	IFFO2			PTP4A2		PITPNC1			TMEM2		UBASH3A		PPP2R5C	MAP3K5	PIK3CG			SHROOM3	PDZRN3	PTP4A3	KIAA0247	PIGC				TCF7	MAN1A1	LOC730227	RAB11FIP1	LOC146880	PITPNA	TARBP1	NEDD4L	LRRC1	KDM6B			SEMA3E				ZFP36L2	TXNRD1	MALAT1
MN1	PDE8A	MIR9-1	LRRC4B	KIAA1737	KIAA1598	IFNK			PTPRC		PKM2			TMEM50A		UBE2D3		PPP3CC	MAP7D1	PIK3IP1			SLC25A25	PFDN1	PTTG2	KIAA0319L	PIK3AP1				TGFBR2	MAP2K3	LPCAT1	RAB20	LOC148696	PLEC	TASP1	NEK2	LRRFIP1	KIAA0415			SEMA6A				ZNF217	TYW3	MAP3K9
MNT	PDK4	MLKL	LRRTM2	KIF13A	KIAA1737	IFT122			RAB11FIP1		PLCG1			TMSB4X		UCP2		PPTC7	MAST3	PIP4K2A			SLC29A1	PFKFB3	PXDN	KIAA0895	PIK3C2B				TGIF1	MAP3K8	LPIN2	RAB40C	LOC158376	PLXNB1	TBC1D5	NEURL	LSM3	KIAA0754			SEPHS1					UBC	MAP4K4
MSI2	PDLIM1	MORF4L2	LRTM2	KIF13B	KIAA1755	IGSF11			RAI1		PNRC2			TNFAIP3		USF1		PRDM1	MAST4	PLCG1			SLC40A1	PFKM	PXN	KIAA1267	PILRB				THBS1	MAP7D1	LPXN	RAB8A	LOC282997	PLXNB2	TC2N	NFATC3	LY86	KIAA0922			2015-09-09					UGT2A3	MAP7D1
MSN	PDXK	MPG	LZTS2	KIF1B	KIF1B	IL18BP			RAP1B		PPP1CB			TNFAIP8		USP20		PREX1	MBD6	PLDN			SLC9A1	PHC2	RAD51L1	KIAA1632	PIP4K2A				TMEM2	MAPK13	LRP8	RAC1	LOC339894	PPAP2C	TERT	NFATC4	LYRM1	KIRREL			SERINC5					UGT2B10	MAPK6
MSRB3	PEMT	MRAS	MACF1	KIF5C	KLF13	IMMP2L			RARA		PPP2R5C			TNFRSF1B		USP3		PRKCH	MBP	PLEC			SMAD3	PITPNM2	RAMP1	KLF13	PIP5K1B				TMEM43	MAPRE2	LRRFIP1	RAI1	LOC388906	PPARA	TES	NFKBIA	MAF	KLF2			SERPINB9					UNG	MBNL2
MT2A	PFKFB3	MRPL37	MAL	KIF6	KLF15	INF2			RBM14-RBM4		PPP3CC			TPP2		VAV1		PRKCQ	MCL1	PLEKHA4			SMAD7	PKM2	RANBP3	KLF4	PLCG2				TMEM66	MAT2B	LSR	RALGDS	LOC400238	PPARGC1B	TGFBR2	NFKBIZ	MALAT1	KLF4			SETD1B					UPK3A	MBP
MTAP	PGS1	MSH2	MALAT1	KLF13	KLF9	INPP5A			RBM15		PRDM1			TRAF1		WDR37		PSD4	MDFIC	PLEKHF1			SMAP2	PLEC	RARA	KLF6	PLEK				TMSB4X	MBP	LYST	RAPGEF1	LOC401233	PPIF	THUMPD2	NHSL1	MALL	KLF6			SETD5					USP25	MCFD2
MTFP1	PHF17	MVK	MAP1B	KLF16	KSR1	IQCK			RC3H2		PRDM8			TRAF3IP3		WHSC1L1		PSTPIP1	MDM4	PPP1R15B			SMG6	PLEKHF1	RASA2	KLHL21	PLEKHF2				TNFAIP3	MCL1	M6PR	RERE	LOC440926	PPP1R13B	TK2	NR0B2	MANBAL	KRAS			SF3B5					UTRN	MCL1
MTHFD1L	PHLDA3	MYH9	MAP3K14	KLF9	LARP6	IQSEC1			RCC1		PREX1			TRIB1		WIPF1		PTGER4	MEF2D	PPP2R5C			SMTN	PLEKHM2	RBM38	KLHL6	PLEKHG1				TNFAIP8	MCTP2	MACF1	RGS3	LOC723809	PPP1R1B	TMEM188	NR5A2	MAPK13	LAMA4			SGK223					UXS1	MET
MXRA7	PHLDB1	MYO18A	MAP4K4	KLHL32	LASP1	IRF2			RCSD1		PRKCH			TSC22D3		XPO6		PTK2B	MGAT1	PREX1			SNORA14B	PLN	RBPMS	KMO	PLEKHO1				TNFRSF1B	MDM1	MALAT1	RHOU	LOC728264	PPP2R5A	TMEM217	NRIP1	MAPKBP1	LAMB1			SHISA3					VAV3	MICAL2
MYC	PHLDB2	MYO1E	MAP6D1	KSR1	LDB3	IRF2BP2			REL		PRKCQ			TSPAN2		YY1		PTP4A2	MGAT5	PRKCH			SNORA59A	PLXND1	RERE	KRT80	PNOC				TOB1	MED15	MAP2K3	RIN2	LOC730227	PPTC7	TMPRSS13	NSMCE2	MARK2	LAPTM4A			SLC2A14					VDAC1	MINK1
MYEOV	PI4KB	NAA20	MAP7	LARP6	LDLRAP1	ITGB4			RHCE		PTGER4			TUBA4B		ZAP70		PTPRC	MICAL2	PRR3			SNX33	POPDC2	RERG	KYNU	POU2AF1				TRAF1	MEF2D	MAP7D1	RNASE4	LOC93432	PQLC1	TMSB4X	NSMCE4A	MAT2B	LASP1			SLC2A3					VGLL4	MIR100
MYH9	PICALM	NAGPA	MAP7D1	LASS4	LENG8	ITM2C			RHOH		PTGES3			UBASH3A		ZBTB1		PTPRJ	MIR1206	PRR7			SOCS3	PPARGC1B	RFX2	LAIR1	PPFIBP2				TRDMT1	MEX3C	MAPK13	RNF19B	LRFN4	PRKCD	TNFAIP3	OAF	MAX	LDB3			SLC36A4					WAPAL	MIR1208
MYL12B	PIK3C2B	NAT9	MAPK4	LDB3	LGALS3BP	ITPK1-AS1			RICTOR		PTK2B			UBE2E3		ZC3H12A		PWP2	MIR1207	PTK2B			SORBS1	PPFIA4	RGMA	LCP1	PPP1R15A				TRERF1	MGAT1	MAPRE2	RNF43	LRP5	PTMA	TNFAIP8	OAT	MCART1	LGALS9			SLC38A1					WDFY2	MIR1260B
MYO1E	PIK3R1	NAV1	MAPRE2	LDHAL6B	LIMCH1	ITPKB			RNF220		PTP4A2			USP3		ZC3H12D		PXN	MIR1301	PTMA			SPARCL1	PPP1CB	RGS3	LCP2	PPP1R16B				TRIB1	MGAT4A	MAST3	RPLP0	LRP5L	PTP4A2	TNFRSF13B	OAZ2	MED18	LHFPL2			SLC38A9					WDR72	MIR1284
MYOF	PKDCC	NCAM1	MARCKSL1	LDLRAP1	LINGO1	JAM3			RNLS		PTPRC			VIM		ZC3H7A		RAB27A	MIR142	PTP4A2			SPC24	PPP1R15A	RIN3	LGMN	PPP2R5C				TRIM14	MGC39372	MAT2B	RRBP1	LRRC32	PTPRF	TNFSF10	OCLN	MFN2	LIF			SLC44A1					WDR74	MIR137
NAA20	PLCXD2	NCOA7	MARK2	LENG8	LITAF	JARID2			RREB1		PTPRJ			WHSC1L1		ZC3HAV1		RAB43	MIR21	PTPN1			SPEG	PPP1R3B	ROPN1	LIMD2	PRDM2				TRY6	MIAT	MATR3	RSPH1	LRRC43	PTPRK	TOP1	OGDH	MGAT1	LMNA			SLC9A3R1					WDYHV1	MIR222
NAGLU	PLD1	NCOR2	MAST3	LIMCH1	LMF1	JUNB			RTN4		PURB			WIPF1		ZFP36L1		RAB7A	MIR23A	PTPN7			SPSB1	PPP2CA	ROR2	LIMS1	PRKCH				TSPAN14	MIDN	MBNL1	RXFP4	LRRFIP1	RAB11FIP1	TRAF3IP2	ONECUT2	MIDN	LOC100129046			SLTM					WWTR1	MIR30A
NAV1	PLEKHF1	NDRG1	MATN2	LINGO1	LMNA	KALRN			RUNX1		RAB11FIP1			ZBP1		ZFP36L2		RAP1A	MIR4269	PTPRC			SPTBN1	PPP2R1B	RPRD1B	LITAF	PRSS2				TSSK6	MIR1284	MBP	RXRA	LTBP4	RAB40B	TRAPPC9	PACSIN3	MIR1284	LOC100129716			SMARCA2					XBP1	MIR3128
NCOR2	PLEKHO2	NDST1	MAX	LIPE	LOC100129726	KANK1			S100PBP		RAB27A			ZBTB25		ZHX2		RAPGEF1	MIR612	PTPRJ			SSH1	PPTC7	RPS24	LMNB1	PTK2B				TTC39B	MIR133A1	MCL1	S100A6	LY86	RAB8A	TRIM33	PARD6B	MIR21	LOC100129726			SOCS3					YAP1	MIR3605
NCRNA00152	PLIN1	NDUFB7	MBNL1	LMF1	LOC100130855	KBTBD11			SAMSN1		RAB8B			ZC3H12A		ZNF217		RASA3	MLLT6	PURB			STAMBPL1	PSAP	RREB1	LMO2	PTMA				TTC39C	MIR142	MCTP2	SAP30BP	MAFF	RAI1	TRYX3	PBX1	MIR23A	LOC100130581			SORL1					YY1	MIR4280
NCRNA00184	PLIN2	NEK2	MBNL2	LMNA	LOC100131496	KCNA2			SCAMP1		RALGDS			ZC3H12D		ZNF331		RASGRP1	MNT	RAB11FIP1			STARD13	PTMA	RTN4	LOC100129726	PTPN1				TXNIP	MIR199A1	MDM4	SATB2	MAGIX	RALGDS	TSHR	PCDH1	MIR26A1	LOC100131551			SOX11					ZCCHC2	MIR583
NCRNA00189	PLOD2	NENF	MBP	LOC100130148	LOC100288346	KCNB1			SDCBP		RANBP9			ZC3H4		ZNF395		RASSF5	MOBKL2A	RAB8B			STIM1	PTP4A2	RUSC2	LOC100130557	PTPN6				UBASH3A	MIR2276	MED15	SCARNA17	MALAT1	RAPGEFL1	UBASH3A	PCDP1	MIR3128	LOC100188947			SOX13					ZFAND2A	MIR760
NDST1	PLXND1	NFASC	MCART1	LOC100131496	LOC100498859	KCNC4			SDCCAG8		RAPGEF1			ZC3HAV1		ZNF831		RBM26	MSN	RAC2			STK40	PTP4A3	SCARB1	LOC100216545	PTPRC				UBC	MIR23A	MEF2D	SDC1	MALL	RARA	UBASH3B	PCK1	MIR326	LOC100216545			SOX2					ZFP36	MIR944
NEAT1	PMEPA1	NFIA	MCF2L	LOC100132707	LOC100507217	KCND3			SELL		RARG			ZFP36				RBM4	MYH9	RALGDS			STOM	PTPN1	SCHIP1	LOC100289473	PVRIG				UCP2	MIR29B2	MGAT1	SDC4	MAP2K3	RHEB	UBC	PCSK5	MIR3646	LOC100289230			SOX21					ZNF217	MKL1
NEDD9	PMP22	NFIB	MCFD2	LOC100133612	LOC100526820	KCNIP3			2015-09-06		RASA3			ZFP36L1				RBMS1	MYL12B	RANBP1			SYNM	PTRF	SDC3	LOC100507217	PWWP2B				UNK	MIR3128	MGAT4A	SDCBP2	MAP3K14	RHPN2	UGP2	PDE4DIP	MIR3649	LOC100526820			SOX5					ZNF367	MMP14
NEK6	PPAP2B	NFIC	MED15	LOC100288346	LOC150381	KCNJ10			SERPINB1		RASSF5			ZFP36L2				RCSD1	MYO18A	RAPGEF1			SYNPO2	PXN	SELPLG	LOC100526820	PXK				USP3	MIR3188	MIA3	SEMA6A	MAP7D1	RIN2	URB2	PDE8A	MIR3918	LOC146880			SP8					ZNF385B	MMP28
NF2	PPARG	NFIX	MEF2D	LOC100498859	LOC283335	KCNJ2			SERTAD2		RBM39			ZHX2				REL	MYO1G	RARA			TACC1	QKI	SERP2	LOC148696	QRSL1				UXS1	MIR3194	MIAT	2015-09-09	MARCKS	RMND5A	USP20	PDLIM1	MIR4267	LOC282997			SPP1					ZNF563	MNT
NFIX	PPP1R12B	NLN	MEGF9	LOC100507217	LOC283999	KCNK1			SETD5		RCC1			ZNF217				RERE	MYO9B	RARRES3			TAGLN	RAB7A	SERPINB6	LOC200261	QSOX2				VIM	MIR548Z	MIR1260B	SERINC2	MARCKSL1	RNF126	VAV3	PDLIM5	MIR4309	LOC283335			SPTLC3					ZNF622	MORC3
NIPAL4	PPP2R1B	NOTCH1	MFAP3L	LOC100526820	LOC284751	KCTD1			SGSM3		RCSD1			ZNF831				RFC1	NCK2	RASA3			TARBP1	RARA	SERPINH1	LOC282997	RAB11FIP1				WDR1	MIR596	MIR1265	SERINC5	MARK2	RREB1	WDR25	PFKFB2	MIR4315-1	LOC284648			STX16					ZNF839	MPRIP
NNMT	PPP2R5A	NOTCH2	MGAT1	LOC283335	LOC285796	KCTD5			SH2B3		RHCE							RGS10	NCRNA00152	RASSF5			TBC1D1	RASA2	SETBP1	LOC284276	RAB30				WHSC1L1	MIR623	MIR1284	SERTAD1	MCF2L	RTKN	WIPF1	PGRMC2	MIR603	LOC285419			SULT6B1					ZNF860	MRPL14
NOTCH2	PPP3R1	NOTCH2NL	MGAT3	LOC285796	LOC338799	KCTD7			SIK3		RHOBTB3							RHOH	NCRNA00241	RBM14-RBM4			TBC1D14	RBFOX1	SH3PXD2B	LOC284751	RABEP2				XPO6	MKNK2	MIR142	SH3PXD2A	MCL1	RUNX1	WT1	PHF19	MKNK2	LOC338799			SUMO1P1					ZNF92	MRPL45
NOTCH2NL	PPTC7	NR1D1	MICAL1	LOC339894	LOC386597	KIAA0415			SLC12A6		RHOH							RNASET2	NDFIP1	RBM38			TBC1D2B	RBFOX2	SHISA4	LOC400236	RAC2				ZBTB1	MNT	MIR23A	SHB	MCM5	RXRA	XBP1	PIGZ	MNT	LOC400236			SYT6						MRPL45P2
NR2F1	PRICKLE2	NR2F1	MICALL1	LOC386597	LOC399959	KIAA0427			SLC25A19		RORA							RNF19A	NDRG1	RBM39			TBC1D7	RBM20	SIL1	LOC400958	RAD51L1				ZBTB7A	MRPL1	MIR3175	SHROOM1	MEF2A	S100A10	ZC3HAV1	PIM1	MOBKL2B	LOC400238			TARS						MSN
NR2F2	PRKAR2B	NTM	MINK1	LOC399959	LOC400238	KIAA0556			SLC25A25		RREB1							RORA	NDUFV2	RCC1			TBL1XR1	RBM24	SLC1A7	LOC541471	RALGDS				ZBTB7B	MRPL10	MIR3188	SIAH2	MEF2D	S100A6	ZFP36L2	PIP5K1B	MOGAT2	LOC400548			TAX1BP1						MSRB3
NRP1	PRPF18	NUAK1	MIR1180	LOC400238	LOC400548	KIAA0895			SLC35B1		RTN4							RPTOR	NEK7	RCSD1			TEAD1	RBM38	SLC25A25	LOC646329	RAPGEF1				ZC3H12A	MSN	MIR3194	SLC12A7	METRNL	SATB2	ZNF217	PITPNB	MPRIP	LOC400931			TBL1XR1						MTAP
NRP2	PSAP	OAF	MIR1284	LOC400931	LOC400931	KIAA1147			SLC37A1		RUNX3							RSBN1	NFATC1	RHCE			TGFBR1	RCSD1	SLC35B1	LOC730227	RAPGEF6				ZC3H12D	MTIF3	MIR568	SLC16A5	MGC57346	SBF1	ZNF236	PLAGL2	MPST	LOC541471			TCP10						MTFP1
NTM	PSMA1	OTUD7A	MIR139	LOC645323	LOC642852	KIAA1598			SLC38A2		S100A11							S1PR1	NFATC2	RHD			TGFBR2	RERE	SLC9A6	LOC90784	RARA				ZC3H4	MTSS1	MIR612	SLC1A5	MGLL	SBF2	ZNF429	PLD1	MSL1	LOC642852			TCP11						MTUS1
NUAK1	PTP4A2	PADI2	MIR219-2	LOC653513	LOC645323	KIAA1614			SLC6A6		SAMHD1							SART3	NFKBIA	RHOBTB3			TGFBR3	RFX3	SMAD7	LPCAT1	RASGRP3				ZC3HAV1	MYH9	MIR650	SLC22A23	MICAL1	SCNN1A	ZNF438	PLEKHA7	MST1P9	LOC653513			TDGF1						MUM1L1
NUAK2	PTPRF	PALM2	MIR2276	LOC728758	LOC646329	KIF13B			SMAD3		SAMSN1							SATB1	NFKBID	RHOF			THBS1	RHOBTB1	SMARCE1	LRRC33	RASSF5				ZDHHC18	MYL12A	MKNK2	SLC25A25	MICAL2	SDC1	ZNF479	PLEKHG3	MTFP1	LOC729177			TEAD3						MYC
OPTC	PXDN	PAQR8	MIR2278	LOC730227	LOC730227	KIF1B			SMAP2		SEMA4D							SCML4	NINJ1	RHOH			THRA	RHOQ	SMOC2	LRRC8C	RBM38				ZFP36	NAA50	MLLT6	SLC3A2	MICALL2	SELO	ZNF498	PLOD2	MTMR11	LOC729970			TERF1						MYH9
PALLD	QKI	PCDH1	MIR2355	LOC90784	LOC90784	KIF21B			SMARCA2		SERINC5							SELPLG	NLRC5	RNF44			TMEM194A	RNF122	SMTN	LRRC8D	RCSD1				ZFP36L1	NAB2	MORN3	SLC45A3	MIDN	SH3BP2	ZNF595	POFUT1	MTUS1	LOC730227			TGIF1						MYL12B
PCDHGC5	RAB1A	PCDH10	MIR23B	LOH12CR1	LOH12CR1	KIF3C			SNORA14B		SERPINB1							SEMA4D	NOSIP	RORA			TNC	RNF144B	SNORA14B	LRRFIP1	RELT				ZFP36L2	NCALD	MRPL1	SLC45A4	MIR126	SH3PXD2A	ZNF596	PPAP2B	MUC13	LRCH1			TGIF2-C20ORF24						MYLK
PDE4DIP	RAB2A	PCDH9	MIR3128	LPAR1	LRIG1	KLC1			SNORA77		SGMS1							2015-09-09	NR1D1	RREB1			TNFRSF1A	RPL19	SNORA45	LRRFIP2	REPIN1				ZNF217	NCK2	MSN	SLC9A1	MIR1284	SHROOM1	ZNF727	PPP1CB	MXD1	LRFN5			TGOLN2						MYO1B
PDE7B	RAC1	PCDHGC5	MIR3167	LPGAT1	LRP1	KLF13			SOCS2		SH2B3							SERINC3	NR4A1	RTN4			TNFRSF1B	RREB1	SNORA59A	LRRK2	RFX1				ZNF80	NCRNA00092	MTERFD2	SLC9A8	MIR193A	SIAH2	ZNF750	PPP1R3B	MYH14	LRIG1			TMC1						MYOF
PDGFC	RAPGEF1	PCSK6	MIR326	LRIG1	LRP4	KLF9			SORL1		SKAP1							SERINC5	NR4A2	RUNX3			TNIP1	RSPH1	SNX19	LTA4H	RHBDF2					NCRNA00152	MTFP1	SMAD3	MIR200C	SIGIRR		PQLC2	MYH9	LRP1			TMEM161B						N4BP1
PDGFRB	RARA	PDE1C	MIR3649	LRP1	LRRC4B	KLHL32			SOS1		SLA							SGSM3	NRADDP	SELPLG			TNS1	RTN4	SORBS1	LY86	RHOH					NCRNA00239	MTIF3	SMAD7	MIR21	SLC12A7		PRDM1	MYL12B	LRP5			TMEM30A						NAA20
PDLIM4	RASA2	PDE4B	MIR3935	LRP4	LRRTM2	KSR1			SPI1		SLC25A45							SH2B3	NTRK1	SEMA4D			TNS4	RUNX1	SPARCL1	LY86-AS1	RHOQ					NCS1	MYH9	SNORA14B	MIR26A1	SLC20A1		PRKAB1	MYL6B	LRRC32			TMPRSS11E						NAV2
PER1	RASA3	PDE4DIP	MIR4269	LRRC4	LRTM2	LARP6			SPTBN1		SLC35E2B							SH3BP5	OBFC1	2015-09-09			TOB1	RUSC2	SPC24	LYN	RNASET2					NDUFV1	MYL12B	SNORD17	MIR3142	SLC22A5		PRKAG2	MYO1E	LRRFIP1			TNFRSF1A						NCRNA00111
PFDN1	RBMS1	PDE8A	MIR575	LRRC8D	LYL1	LASP1			SPTLC2		SLC38A2							SH3KBP1	OGDH	SERPINB1			TPCN1	RXRA	SREBF1	LYVE1	RNLS					NEAT1	MZF1	SPAG9	MIR326	SLC25A1		PRKCZ	MYO7B	LRWD1			TNRC6B						NCRNA00152
PFKP	RBPMS	PDGFRL	MIR612	LRRTM2	LZTS2	LDB2			SRSF11		SLC6A6							SIRPG	OGT	SESN2			TRAF3IP2	SAMD4A	SSH1	LYZ	RRAS2					NEDD9	NAB2	SPATA2	MIR3646	SLC25A10		PRKG2	MYOF	LTBP4			TOP1P2						NCRNA00173
PGS1	RERE	PDHB	MIR638	LRTM2	MACF1	LDB3			SRSF4		SLC9A1							SKAP1	ORAI1	SH2B3			TRAK1	SBDS	ST5	LYZL2	SASH3					NEK7	NCALD	SPEN	MIR4269	SLC25A25		PRR15	MYOM3	LY86-AS1			TOX3						NCRNA00261
PHLDA1	RFTN1	PEA15	MIR9-1	LZTS2	MAD1L1	LDLRAP1			ST3GAL1		SLFN5							SKI	P2RX4	SH3BGRL3			TRDMT1	SCARB2	STARD13	MALAT1	SEL1L3					NET1	NCK1	SPINT2	MIR638	SLC38A1		PTGES3	NAB2	LYL1			TPM3						NCRNA00263
PHLDA3	RFX2	PEX5L	MKNK2	MAD1L1	MAL	LIMCH1			ST8SIA6		SMAD3							SLC38A1	P2RY8	SIGLEC6			TRIB1	SCHIP1	STK38L	MAML1	SELL					NFATC2	NCK2	SPIRE2	MKNK2	SLC38A2		PTK2B	NAGLU	LZTS2			TRERF1						NDRG1
PHLDB1	RGS3	PHACTR3	MLKL	MAL	MALAT1	LINGO1			STAM		SMAD7							SLC39A10	P4HB	SLA			TRIM8	SCN4A	STON1-GTF2A1L	MANBA	SELPLG					NFATC3	NCRNA00152	SPNS2	MLKL	SLC45A4		PTP4A2	NAT9	MAB21L1			TRIM2						NDUFS5
PHLDB2	RHOB	PHB	MN1	MALAT1	MAP1B	LIPE			STAT3		SMAP2							SLFN5	PAG1	SLC25A25			TRIO	SDC4	SVIL	MANBAL	SEMA4B					NFKBIA	NCRNA00239	SPRED2	MLPH	SLC6A9		PTPN3	NCOA7	MACF1			TRIM24						NEDD4L
PIGV	RHOBTB3	PHC2	MPG	MAN2A1	MAP1LC3A	LLGL1			STAT5A		SMARCA2							SMAD3	PBX2	SLC25A26			TSHZ1	SEC13	SYNM	MAP2K3	2015-09-06					NFX1	NDUFV2	SPSB1	MLXIP	SLC9A3		PTPRF	NCOR2	MAGEF1			TRIM71						NFE2L1
PIM1	RNF138P1	PHF12	MPRIP	MAP1B	MAP3K11	LMF1			STIM1		SMYD3							SMAP2	PBX4	SLC25A37			TSPAN15	SEC14L1	SYNPO	MAP3K1	2015-09-09					NLRC5	NEDD9	SPTBN1	MMP23A	SLCO4A1		PTPRK	NCRNA00114	MALAT1			TRIM8						NFIB
PITRM1	RPL23AP32	PHLDA3	MRAS	MAP4K4	MAP4K4	LMNA			SYK		SNORA59A							SMCHD1	PCBP1	SLC2A3			UBC	SEC61B	SYNPO2	MAP3K2	SERTAD2					NR1D1	NEK7	SQRDL	MNT	SLMO2		PVR	NCRNA00120	MAMSTR			TRPM3						NFIX
PKM2	RREB1	PHLDB1	MRVI1	MAP4K5	MAP6D1	LOC100126784			TAB2		SNX5							SMEK1	PDE4B	SLC3A2			UBE2V1	SEMA6C	TACC1	MAP3K5	SESN3					NTRK1	NELL2	SREBF1	MPRIP	SMAD7		RAB10	NCRNA00167	MAP3K14			UBC						NMNAT2
PLA2R1	RTN4	PHLPP1	MSI2	MAP6D1	MAP7	LOC100128239			TAGAP		SOCS1							SMPD1	PFKFB3	SLC6A6			VAPA	SERBP1	TACC2	MAP3K8	SF1					NUP153	NFATC2	SREBF2	MRPL14	SNORA80B		RAB11FIP1	NCRNA00184	MAPKAPK2			UGP2						NNMT
PLEKHA2	RUNDC2C	PHYHIPL	MT2A	MAP7	MAP7D1	LOC100130155			TAL1		SORT1							SNORA70G	PGAM1	SLC9A1			WASF2	SERPINF1	TACR2	MAP4K4	SH3BP2					ODF3B	NFATC3	ST14	MRPL37	SNX33		RAB4A	NDRG1	MAT2B			UGT8						NOTCH2
PPP1R15A	RUNX1	PICALM	MTCH1	MAP7D1	MAPRE3	LOC100130855			TAOK3		SOS1							SNORD12C	PGS1	SLMO2			WBP2	SESN1	TAGLN	MAPK1	SIK1					OGDH	NFKBIA	ST3GAL4	MST1P9	SOCS6		RAB8A	NDST1	MATN2			UPP1						NOTCH2NL
PPP2R1B	RUNX1T1	PICK1	MTSS1L	MAPRE2	MARK2	LOC100131496			TBC1D7		SPEN							SNRK	PHF11	SMAD3			WDR1	SH3BP5	TARBP1	MAPK14	SIPA1L3					OR4N3P	NLRC5	ST6GALNAC1	MUC1	SOD2		RAD51L1	NEDD4L	MBNL2			USO1						NPAS2
PPP2R4	RUSC2	PIGT	MTUS1	MAPRE3	MAST3	LOC100132707			TBCC		SPOCK2							SNX20	PHF15	SMAD7			WTAP	SH3PXD2A	TBC1D1	MAPKAPK3	SLC15A4					ORAI1	NR1D1	ST6GALNAC4	MUC12	SPAG9		RAI1	NEDD9	MBP			USP28						NR3C1
PREP	RXRA	PIK3C2B	MVK	MARCKSL1	MAT2A	LOC100192378			TBL1XR1		SPTBN1							SORL1	PHLDA1	SMAP2			XBP1	SHISA4	TEAD1	2015-03-01	SLC25A19					ORAI2	NR4A2	STK24	MUC2	SPATA20		RALB	NEK2	MCAM			VASH2						NRG1
PRICKLE2	S100A10	PIK3IP1	MXI1	MARK2	MBNL2	LOC100268168			TEC		SRGN							SP100	PIGV	SMYD3			XYLT1	SIX1	TEAD3	MARCKS	SLC35B2					OTUD5	NTRK1	STK40	MUC4	SPEN		RARA	NEURL	MCL1			VCAN						NRP1
PRPF18	SAMD4A	PIK3R1	MXRA7	MAST3	MBP	LOC100288346			TGFBRAP1		SRSF3							SPOCK2	PIK3IP1	SNAP29			ZBTB16	SLC15A4	TGFBR3	MARCO	SLC35E1					P2RY8	ODF3B	SUSD1	MYEOV	SPINT1		RASSF6	NEURL1B	MEF2D			VCL						NRP2
PRRX1	SASH1	PIP4K2A	MYH9	MAT2A	MCF2L	LOC100289473			TM7SF3		ST3GAL1							SPTBN1	PIK3R5	SNORA14B			ZC3H4	SLC25A25	THBS1	MARK2	SLC38A1					PATL2	OGDH	SYNPO	MYH14	SPINT2		RBBP8	NFATC3	MEG3			VPS8						NSMCE2
PRSS23	SCARB2	PLA2G16	NAA20	MATN1	MCFD2	LOC100498859			TMBIM1		ST6GAL1							ST3GAL1	PIM1	SNORA59A			ZCCHC24	SLC29A1	THRA	MARK3	SLC38A2					PCM1	OPRM1	TBC1D10A	MYH9	SPIRE2		RBM47	NFATC4	MEOX2			VRTN						NT5DC3
PTK7	SCHIP1	PLCG1	NAGLU	MAX	MED15	LOC100507217			TMEM140		ST8SIA4							ST6GAL1	PIM2	SNORD35B			ZEB2	SLC38A2	TIMP3	MAX	SLC39A10					PDE4B	ORAI2	TBC1D14	MYL6B	SPPL2B		RERE	NFKBIA	METAP2			VWDE						NT5E
PTPN14	SDCBP2	PLD1	NAPA	MBNL2	MEF2D	LOC148696			TMEM14E		STAM							ST8SIA4	PIP4K2A	SNX5			ZFP36	SLC38A6	TMEM100	MBOAT1	SLC6A6					PEX14	ORM2	TBC1D22A	MYO15B	SPRED2		RHOU	NFKBIZ	METTL11A			WBSCR17						NTM
PTPRB	SEC14L1	PLEKHF1	NAV1	MBP	MEGF10	LOC254559			TMOD3		STAT5A							STAT1	PITPNC1	SOCS1			ZFP36L1	SLC40A1	TMEM51	MBP	SMAD3					PHF20	OSTCL	TCF7L2	MYO1C	SPRY2		RHPN2	NHSL1	MFSD11			XYLT1						OCIAD2
PXDN	SEC22B	PLEKHG3	NCAM1	MCF2L	MFAP3L	LOC283335			TNFAIP8		STIM1							STAT5B	PKDCC	SPEN			ZFP36L2	SLC7A2	TNC	MCFD2	SMAP2					PIK3AP1	OTUD5	TGIF1	MYO1E	SPSB1		RIN2	NLRP6	MGAT1			ZFHX2						OGDH
PXN	SEMA3C	PLEKHO2	NCOA7	MCFD2	MGAT1	LOC283999			TNFRSF1A		STIM2							STIM1	PLAGL2	SPTBN1			ZMIZ1	SLED1	TNFRSF1A	MED13L	SNN					PIK3C2B	OXNAD1	TINAGL1	NADK	SPTBN1		RND3	NR5A2	MGC15885			ZFP36L2						OSBPL3
R3HCC1	2015-09-11	PLLP	NCOR2	MDGA1	MGAT3	LOC285796			TNIP1		STK10							STK10	PLCD1	SREBF1			ZNF462	SLN	TNP1	MEF2D	SNORD56B					PIK3IP1	P2RY8	TJP3	NANS	SQSTM1		RNF19A	NRARP	MGMT			ZIC3						OSTCL
RAB12	SERPINH1	PMS2P3	NDRG1	MED15	MGC16025	LOC286094			TNRC18		STK17A							STK17A	PLCG1	SRGN				SMAD3	TNS1	MEFV	SP100					PIK3R5	PAG1	TMEM105	NCOR2	SREBF1		RREB1	NRIP1	MIMT1			ZIC5						PA2G4P4
RAGE	SESTD1	PNMA1	NDST1	MED8	MGRN1	LOC344595			TOR1AIP1		STK17B							STK17B	PLD6	SRSF3				SMAD7	TOB1	MEGF9	SP110					PILRB	PATL2	TMEM106C	NCRNA00262	SREBF2		RSPH1	NSA2	MIR1-1			ZMYND8						PACSIN2
RAI14	SETD5	POC1A	NDUFB9	MEF2D	MICALL1	LOC386597			TRANK1		STK4							STK24	PLEC	SSBP4				SMG6	TPM1	MEMO1	SP140L					PIP4K2A	PBXIP1	TMEM184A	NDRG1	ST14		S100A10	NSMCE2	MIR1244-2			ZNF202						PALLD
RASA2	SH2B3	POLR3H	NEK2	MEGF9	MIDN	LOC400238			TRIM27		STK40							STK38	PLEKHF1	ST6GALNAC6				SMTNL2	TRAK1	METTL11A	SPEN					PITPNC1	PCBP1	TMPRSS2	NDST1	STK24		S100A11	NUAK2	MIR1260B			ZNF217						PALMD
RASA3	SH3BP5	POMT2	NEK6	MFAP3L	MINK1	LOC400931			TRIM8		SYNE2							STK4	PLEKHG3	ST8SIA4				SNORA14B	TRIO	METTL9	SPIB					PLAC8	PCF11	TNIP1	NEAT1	SUSD1		SAR1B	NUDT16L1	MIR148A			ZNF281						PARD3
RBBP8	SH3GLB1	POU3F3	NENF	MGAT3	MIR1180	LOC400960			TRPS1		TBC1D2B							STK40	POU2F2	STAT5B				SNORA59A	TRMT61A	MGAT1	SPTBN1					PLCG2	PDCD4	TNRC18	NEDD9	SUV420H1		SCARB2	OAF	MIR196A2			ZNF292						PARD6B
RBP1	SHB	PPFIBP1	NFASC	MGC16025	MIR1301	LOC645323			TSPAN2		TBCC							TARP	PPP1R15A	STIM1				SNORA76	TSC22D3	MGC16025	ST3GAL2					PLEK	PDE4B	TNS3	NEK6	TACC2		SDC1	OAT	MIR21			ZNF398						PCDHGC5
RCAN1	SLC16A7	PPFIBP2	NFIA	MGLL	MIR139	LOC653513			TSSK6		TBL1XR1							TBC1D22A	PPP1R15B	STIM2				SNTA1	TSHZ1	MGC39372	ST3GAL5					PLEKHF1	PER1	TOB1	NEURL	TAGLN2		SEMA6A	OAZ2	MIR23A			ZNF462						PDE6A
RERE	SLC19A3	PPIF	NFIB	MICAL3	MIR193A	LOC728758			TTYH3		TCF7							TCF7	PPP1R16B	STK10				SOCS3	TSPAN15	MGRN1	ST6GAL1					PLEKHG3	PHF15	TPCN1	NEURL1B	TBX10		SEMA6D	OCLN	MIR3126			ZNF532						PDGFC
RFX3	SLC1A4	PPM1H	NFIC	MICALL1	MIR219-2	LOC730811			TXNIP		TGFBR2							TGFBR2	PPP2R5C	STK17B				SORBS1	TSPAN18	MIAT	ST6GALNAC4					PLEKHO2	PHF20	TPM1	NFIA	TCEA3		2015-09-09	OGDH	MIR3175			ZNF649						PDLIM5
RGMB	SLC22A23	PPP2R1B	NFIX	MINK1	MIR2355	LOC90784			UBAP2L		TGIF1							TGOLN2	PPP4C	STK4				SORBS3	TSPAN2	MIR1260B	STIM1					PPP1R10	PICALM	TRAK1	NFIX	TEAD1		SERPINB1	P2RX4	MIR3183			ZNF664						PELI1
RGS3	SLC27A3	PPP2R2A	NIN	MIR1180	MIR3074	LOH12CR1			UBE2D3		TGOLN2							THAP2	PPP6R1	STK40				SORT1	TUBA1A	MIR1284	STK17A					PPP2R5C	PIK3IP1	TRIM2	NMUR1	TEF		SERPINB6	P2RY6	MIR424			ZNRF3						PERP
RND3	SLC29A1	PPP2R4	NIPAL4	MIR125B1	MIR3128	LRIG1			UCP2		TMBIM1							THEMIS	PPTC7	STX16				SPAG17	TUBB6	MIR142	STK17B					PPP3CC	PIK3R1	TRIM69	NOTCH1	TFEB		SH3PXD2A	PAQR8	MIR4269			ZPBP						PFDN1
RNF216	SLC38A2	PREX1	NKX6-2	MIR1301	MIR3183	LRP4			UNC119B		TMC6							TMBIM6	PRDM1	TAGLN2				SPARC	TWIST2	MIR1537	STK4					PPP6R1	PIK3R5	TRIM8	NR1D1	TGIF1		SH3RF1	PARD6B	MIR455			ZSCAN10						PFKP
RPS23	SLC7A6	PRKCA	NLN	MIR139	MIR326	LRRTM2			UNC13D		TMEM116							TMEM49	PRDM8	TBC1D2B				SPEG	TXN2	MIR1976	STK40					PREX1	PILRB	TRIP10	NR3C2	TLK2		SHB	PBX1	MIR548AA1									PHLDA3
RPSAP52	SLED1	PRPF40A	NOTCH1	MIR153-1	MIR33B	LRTM2			USF1		TMEM209							TMEM66	PREX1	TBCC				SPPL2A	UBC	MIR2355	STRBP					PRKCH	PIP4K2A	TRMT61A	NR4A1	TMEM141		SIN3A	PCDP1	MIR641									PHLDB2
RSU1	SLTM	PRR18	NOTCH2	MIR190	MIR346	LYSMD2			USP15		TMEM43							TMSB4X	PRKAR1B	TCF7				SPRY1	UBE2V1	MIR3175	STX11					PRKCQ	PITPNC1	TSKU	NRARP	TMEM171		SIPA1L3	PCSK5	MIR648									PIK3C2G
RUNDC2C	SMAD3	PRUNE2	NOTCH2NL	MIR193A	MIR3649	LZTS2			USP20		TMEM50A							TNFAIP3	PRKCH	TGIF1				SPTB	UNQ6975	MIR3198	STX7					PRR5L	PLCG1	TSPAN15	NXT1	TMEM184A		SLC11A2	PDE3A	MIR675									PIK3R1
RUNX1	SMAD6	PSAP	NPAS3	MIR1976	MIR3935	MACF1			VAPA		TMEM66							TNFAIP8	PRKCQ	THAP7				SREBF1	VAPA	MIR340	SYPL1					PSMB1	PLCG2	TXNIP	OAF	TMEM187		SLC15A1	PDE4DIP	MIR938									PISD
RUNX2	SMAD7	PTPRD	NR1D1	MIR2355	MIR4251	MAD1L1			VIM		TMF1							TNFRSF1A	PRPF38B	TIGIT				SRL	WASF3	MIR3922	TAGAP					PSMB8	PLEC	UBC	OAZ1	TMPRSS2		SLC1A1	PDE6A	MIR99A									PKM2
RUSC2	SNORA14B	PTPRF	NR4A1	MIR23B	MIR4269	MAL			VPS37B		TMSB10							TNFRSF1B	PRR7	TMC6				SSH1	WISP1	MIR620	TAGLN2					PSTPIP1	PLEK	UCKL1-AS1	ODF3B	TNIP1		SLC22A23	PDGFA	MKNK2									PKP1
S100A10	SNRK	PTPRJ	NTM	MIR3128	MIR4274	MALAT1			WHSC1L1		TMSB4X							TNFSF10	PSD4	TMEM43				STOM	WWC3	MNDA	TBC1D22A					PTK2B	PLEKHG3	UNC5B	OGDH	TNRC18		SLC22A4	PDLIM1	MMP2									PLAU
S100A2	SOD2	PTPRK	NUAK1	MIR3138	MIR4296	MAN2A1			WIPF1		TNF							TNFSF8	PSMB8	TMEM50A				SUN1	YPEL2	MNT	TBC1D7					PTMA	PNRC2	USP12	OMP	TOB1		SLC25A45	PDLIM2	MNT									PLD1
SASH1	SORT1	PWP2	OAF	MIR3167	MIR4316	MAP1A			WTAP		TNFAIP3							TNIP1	PSMD13	TMEM66				SVIL	ZBTB16	MOBKL2A	TBCC					PTPN6	POLR3GL	VASP	OSTALPHA	TOB2		SLC26A2	PDLIM5	MPRIP									PLEKHG3
SCHIP1	SOS1	QDPR	OTUD7A	MIR326	MIR499	MAP1B			XBP1		TNFAIP8							TNRC6B	PSTPIP1	TMPO				SYNM	ZCCHC24	MPPE1	TFEB					PTPRC	PPP1R10	VDAC1	P4HB	TP53INP2		SLC2A2	PDXK	MRPL23									PLEKHG7
SDC4	SOX5	RAB11FIP4	PACS2	MIR346	MIR575	MAP3K12			XYLT1		TNFRSF1B							TOP1	PTGER4	TMSB4X				SYNPO	ZFHX3	MS4A7	TGFBR2					PTPRE	PPP1R15B	VDR	PACSIN2	TPM1		SLC38A2	PER2	MRPS18A									PMS2P11
SDCCAG8	SP3	RAB30	PADI2	MIR3649	MIR611	MAP4K4			YWHAG		TNFSF8							TRAF1	PTK2B	TNFAIP8				SYNPO2	ZFP36L1	MSL1	TGIF1					PTPRJ	PPP1R16B	VILL	PAK4	TRAF4		SLC39A14	PEX26	MTHFD1L									PNMAL1
SEC22B	SPAG17	RAB40B	PAQR8	MIR3935	MIR638	MAP4K5			YY1		TNIP1							TRAF3IP3	PTMA	TNFRSF1B				TACC2	ZKSCAN3	MSN	TMEM2					PVRIG	PPP2R5C	VIPR1	PAQR5	TREX1		SLC40A1	PFKFB2	MTHFR									PPARD
SEMA5A	SPARC	RAB4A	PCDH1	MIR4254	MIR648	MAP6D1			ZBTB16		TOB1							TRAF5	PTP4A2	TP53BP2				TARBP1	ZMIZ1	MTHFR	TMEM66					PWP2	PPP3CC	VPS37B	PCDH1	TRIB1		SLC5A1	PI4K2A	MTSS1L									PPFIBP1
SEMA7A	SPARCL1	RALGDS	PCSK6	MIR4269	MIR9-1	MAP7			ZC3H7A		TOP1							TRDMT1	PTPN1	TPP2				TBC1D22A		MTMR6	TMSB10					PXN	PPP6R1	WDR1	PDE8A	TRIM8		SLC6A20	PIGL	MXRA7									PPIF
2015-09-11	SPC24	RAP2A	PDE4B	MIR4274	MKNK2	MAP7D1			ZC3HAV1		TP53BP2							TRERF1	PTPN6	TRAF1				TBC1D4		MTPN	TMSB4X					RAB11FIP1	PREX1	WDR25	PDE9A	TRIP10		SLC9A3	PIGR	MYH3									PPP1CB
2015-09-09	SPRY1	RAPGEF5	PDE4DIP	MIR499	MLKL	MAPRE2			ZDHHC5		TP53INP1							TRIM14	PTPN7	TRANK1				TBC1D8		MTSS1	TNFAIP8					RAB27A	PRKAR1B	WHSC1	PDLIM1	TRMT61A		SMAD3	PIGZ	MYH9									PPP1R12B
SERP2	SRSF4	RASA2	PDE8A	MIR575	MNT	MARCKSL1			ZEB2		TPP2							TSPAN14	PTPRC	TRAPPC10				TBL1XR1		MXD1	TNFRSF13B					RAC2	PRKCH	WNK2	PDLIM4	TRPM4		SMAD6	PIK3R3	MYO18A									PPP1R14C
SERPINB6	SSH1	RASA3	PDHB	MIR577	MOBKL2B	MARK2			ZFP36L2		TRANK1							TTC39C	PTPRJ	TRIB1				TEAD1		MYCBP2	TNFRSF13C					RAD51L1	PRKCQ	WSB2	PDXK	TSC22D2		SMAD7	PIM1	MYOC									PPP1R15B
SERPINE1	SSR1	RBPJ	PDXK	MIR612	MOBP	MAST3			ZKSCAN3		TRAPPC10							UBASH3A	PWP2	TRIB3				TEAD4		MYH9	TNFRSF1B					RALGDS	PRR14	XBP1	PER1	TSHZ1		SNORA14B	PIP5K1B	MYOD1									PPP2R2A
SERPINH1	ST3GAL1	RERE	PEA15	MIR638	MPG	MAT2A			ZMIZ1		TRIB1							UBASH3B	RAC2	TRIM39				TFEB		MYL12B	TPD52					RAP1B	PRR5L	YWHAZ	PER2	TSKU		SNORA45	PITPNB	MYOF									PPTC7
SETD5	STAMBPL1	RFFL	PEX5L	MIR648	MPRIP	MAX			ZNF395		TRIB2							UBC	RALGDS	TSC22D3				TGFB2		MYO18A	TRAF1					RAPGEF1	PRSS1	ZBTB7A	PFDN1	TSPAN3		SNORD17	PKDCC	MYOG									PREP
SGK1	STARD13	RHOB	PFKFB3	MIR9-1	MRPS23	MBNL1			ZNF429		TRIB3							UBE2D3	RAP1A	TSPAN14				TGIF1		MYO9B	TRAF3					RARA	PSMB8	ZBTB7B	PGS1	TSPO		SNX5	PLA2G12A	N4BP2									PRICKLE2
SH3BP4	STAT3	RHOBTB2	PGBD5	MLL5	MRVI1	MBNL2			ZNF521		TRIM8							UCP3	RAPGEF1	TSSK6				THRAP3		NAA20	TRAK1					RARG	PSTPIP1	ZBTB7C	PHF15	TST		SORBS1	PLA2G6	NAB2									PRSS3
SH3BP5L	STAT5B	RNF216	PHACTR3	MMAB	MSH2	MBP			ZNF764		TSC22D3							UNC13D	RARA	TXNIP				TMCC1		NACC2	TRANK1					RASA3	PTGER4	ZC3H12A	PIGR	TTC22		SORBS3	PLAGL2	NAGLU									PSMG1
SHB	STIM1	ROCK2	PHC2	MOBP	MSI2	MCART1			ZNRF1		TTC39C							UNK	RARG	UBAC1				TMEM11		NADK	TREML2					RASSF5	PTGES3	ZC3H4	PIGT	TUBGCP6		SOX4	PLEKHA6	NCALD									PTHLH
SIPA1L3	STK38L	RPP14	PHF12	MORF4L2	MT2A	MCF2L					UBASH3A							UPP1	RASA3	UBC				TMEM182		NCF2	TRIM8					RBM39	PTK2B	ZFP36	PIK3IP1	TXNDC11		SP1	PLEKHA7	NCKAP5L									PTPN1
SLC25A25	STK40	RPS6KA1	PHLDB1	MPG	MTCH1	MCFD2					UBE2D3							USP3	RASGRP1	UBE2D3				TMEM189-UBE2V1		NCOA4	TRIO					RCSD1	PTMA	ZFP36L2	PIM3	TYMP		SPATS2L	PLEKHB2	NCOR2									PTPN14
SLC38A2	SYNPO	RTN4	PHLPP1	MPRIP	MTMR4	MED15					UCA1							VAV1	RASSF5	UCP2				TNFRSF1A		NCOR2	TSC22D3					RFC3	PTP4A2	ZFYVE28	PITPNA	UBC		SPRY1	PLEKHG3	NCRNA00152									PTPRK
SLC38A6	TACC1	RYBP	PHYHIPL	MRAS	MTSS1L	MED9					UCP2							VOPP1	RCAN3	UQCRFS1				TNIK		NCRNA00152	TTC9					RFX1	PTPN6	ZMIZ1	PITPNM2	UCKL1		SPTBN1	PLLP	NCRNA00163									PTTG2
SLC3A2	TARBP1	S100B	PI4KB	MSH2	MVK	MEF2D					UQCRFS1							WDR37	RCSD1	USP20				TNIP1		NCRNA00184	TTLL10					RHBDF2	PTPRC	ZNF217	PKDCC	ULK4		SRSF3	POFUT1	NCS1									PXN
SMAD3	TBC1D10A	SAMD4B	PIGT	MTCH1	MXI1	MEGF10					USP3							WDR82	REREP3	VCL				TNNI1		NCRNA00189	TXNIP					RHOH	PTPRE	ZNF710	PLEKHA6	UPK3B		SRSF4	POLD4	NDUFB7									PYGB
SMAD7	TBC1D2B	SAP30BP	PIGV	MTMR10	MYBPHL	MEGF9					VAPA							WHSC1L1	RGS14	WBP2				TNNT3		NDRG1	UBC					RHOQ	PTPRJ	ZNF787	PLEKHA7	VASP		SSBP3	PPAP2B	NEAT1									R3HCC1
SMG6	TBC1D4	SASH1	PIK3C2B	MTSS1L	MYH9	MEIS2					VIM							XPO6	RHOH	WDR1				TNS1		NDUFA10	UCP2					RIN3	PURB	ZSWIM6	PLEKHG3	VEGFA		SSX2IP	PPP1R15A	NEDD9									RAB10
SMYD3	TBL1XR1	SCARB2	PIK3IP1	MTUS1	MYLK	MFAP3L					WDR1							XRCC5	RICTOR	WDR74				TOB1		NEAT1	USP3					RORA	PWP2	ZZEF1	PLXNB1	VILL		ST3GAL2	PPP1R3B	NEK6									RAI1
SNAI2	TBX15	SCHIP1	PIK3R1	MVK	MYO1E	MGAT3					WDR37							YY1	RILPL2	WHSC1L1				TOB2		NEDD9	USP6NL					RPL10	RAB27A		PMS2P11	VPS37B		ST6GALNAC1	PPP2R4	NES									RAP2B
SNORA14B	TCF4	SEC14L1	PIP4K2A	MXI1	MYO9B	MGC16025					WHSC1L1							ZAP70	RNASET2	WIPF1				TOM1		NEK6	UST					RPS6KA1	RAB8B		PMVK	WASF2		STAMBPL1	PRDM1	NEURL									RAPGEF1
SNX33	TCF7L2	SEC14L2	PITPNM2	MYCNOS	NAA20	MICAL2					WIBG							ZBTB17	RNF19A	WRAP53				TPCN1		NFAM1	VOPP1					RUNX3	RALGDS		POFUT1	WNK2		STAT3	PREP	NFIA									RAPH1
SOCS3	TGFBR2	SEMA6A	PLA2G16	MYH9	NAB2	MICALCL					WIPF1							ZC3H12D	RNF213	XBP1				TPM1		NFKBIZ	VPREB1					S1PR1	RAP1A		POLD4	ZBTB7A		STK24	PRKAG2	NFIB									RASSF10
SPARC	TGFBR3	SEMA7A	PLCG1	MYO18A	NACAD	MICALL1					WNK1							ZC3HAV1	RNPEPL1	YES1				TRAF3IP2		NIN	WDFY4					S1PR5	RAPGEF1		POLE4	ZBTB7B		STK40	PRKCZ	NFIC									RASSF6
SPEN	THBS1	2015-09-04	PLEKHF1	MYOT	NACC2	MINK1					XPO1							ZFP36L2	RORA	ZBTB1				TRAK1		NINJ2	WEE1					SASH3	RAPGEF6		PPAPDC3	ZBTB7C		STX3	PRKG2	NFIX									RBBP8
SPHK1	TIMP2	2015-09-08	PLEKHG3	NAA20	NAP1L4	MIR1178					XPO6							ZNF184	RPS6KA3	ZBTB38				TRDN		NLRP3	WHSC1L1					SATB1	RARA		PPARGC1B	ZC3H4		SULT1B1	PRR15	NFKBIA									RBFOX2
SPP2	TIMP3	SERINC5	PLEKHH1	NACAD	NAPA	MIR1180					YES1							ZNF410	RQCD1	ZC3H12A				TRIB1		NOTCH1	WIPF1					SELPLG	RASA2		PPFIBP2	ZFAND5		SUOX	PRR15L	NFYA									RBMS1
SPTBN1	TIMP4	SERP2	PLEKHO2	NADK	NAV1	MIR124-1					YPEL5							ZNF778	RUNX1	ZC3H4				TRIM54		NOTCH2	XPO6					SEMA4D	RASA3		PPIF	ZFP36		SUPT4H1	PRR5L	NINJ2									RBMS3
SSFA2	TKT	SGK1	PLLP	NAGLU	NCAM1	MIR125B1					YWHAG							ZNF80	RUNX2	ZC3H7A				TRIM8		NOTCH2NL	XYLT1					2015-09-02	RASGRP1		PPP1R13B	ZFP36L1		SYNJ2	PRSS3	NOTCH1									RBPMS
SSH1	TMEM135	SGMS1	PLOD1	NAP1L4	NCOA7	MIR1301					YY1							ZNF831	RUNX3	ZC3HAV1				TSC22D3		NSF	YWHAZ					2015-09-09	RASSF5		PPP1R14C	ZFP36L2		TARBP1	PRSS8	NOTCH2									RFX2
SSR3	TMEM189-UBE2V1	SH2B3	PLXNB1	NAV1	NCOR2	MIR139					ZBTB38							ZSCAN16	SASH3	ZEB2				TSPAN15		NSFL1C	ZBTB1					SERTAD2	RBM39		PPP1R1B	ZFYVE28		TBC1D1	PTGES3	NOTCH2NL									RGMB
STARD13	TMEM2	SH2D6	PLXND1	NCAM1	NCRNA00241	MIR181B1					ZC3H4								SDCBP2	ZFC3H1				TTN		NSMCE2	ZC3H12D					SH2B3	RCSD1		PPP6R1	ZMIZ1		TBC1D14	PTK2B	NPEPL1									RGNEF
STC2	TNFRSF1A	SH3PXD2A	PMEPA1	NCOA7	NDE1	MIR1913					ZC3HAV1								SELPLG	ZFP36				TXLNB		NT5C2	ZC3H4					SH3BGRL3	RFTN1		PPTC7	ZNF703		TBC1D16	PTMA	NR1D1									RIPK4
STK17A	TNFRSF1B	SHISA4	PMP22	NCOR2	NDRG1	MIR219-2					ZFC3H1								SEMA4D	ZFP36L1				TXN2		NUDT3	ZC3HAV1					SIGLEC9	RFX1		PQLC1	ZNF747		TBC1D2	PTPRF	NR2F2									RND3
STK40	TNFSF10	SIK3	PMS2P3	NCRNA00241	NDST1	MIR2355					ZFP36L1								2015-09-09	ZFP36L2				UBC		NUP210	ZFP36					SIK1	RGPD3		PRKCD	ZNF787		TBC1D2B	PTPRK	NR4A1									RNF145
STX16	TNIP1	SIL1	POLR3H	NDE1	NDUFA10	MIR23B					ZFP36L2								SERPINB1	ZFYVE28				UBE2D3		OAZ2	ZFP36L1					SKAP1	RGS3		PRKCG	ZNRF2		TBL1XR1	PVR	NR4A2									RNF19B
SUSD1	TNKS1BP1	SIRPA	POMT2	NDRG1	NDUFB9	MIR26A1					ZNF175								SERTAD1	ZKSCAN3				UBE2G1		ODF3B	ZHX2					SKI	RHBDF2		PSD4	ZSWIM6		TCF7L2	PWWP2B	NRP1									RNF217
SYNJ2	TNRC6A	SKI	POU3F3	NDST1	NEAT1	MIR3128					ZNF217								SH2B3	ZMYND8				USP2		OGDH	ZNF217					SLA	RHOF		PSMA6	ZZEF1		TEAD1	PXN	NUFIP1									RNU4ATAC
SYNM	TNS1	SLAIN1	PPFIBP2	NDUFA10	NECAP2	MIR3138					ZNF311								SH3BGRL3	ZNF217				UTP11L		OSTALPHA	ZNF860					SLAMF7	RHOH		PTMA			TEP1	RAB11FIP1	NXN									RPL22L1
SYT14	TNS3	SLC1A3	PPIF	NDUFB9	NEK6	MIR3167					ZNF542								SH3BP5	ZNF311				VAPA		OSTF1						SLC15A4	RIN3		PTP4A2			TFEB	RAB17	OAF									RPS23
TAGLN2	TPRG1	SLC22A15	PPM1F	NEK3	NENF	MIR3175					ZNF831								SH3KBP1	ZNF394				VEGFA		P2RX7						SLC16A6	RNF44		PTPRF			TFF3	RAB8A	OAZ2									RREB1
TBX3	TRAF3IP2	SLC22A23	PPM1H	NENF	NEURL	MIR3188													SIAH2	ZNF542				VGLL2		P2RY2						SLC25A26	RORA		PWWP2B			TGIF1	RAD51L1	OLFML2A									RRN3P1
TEAD1	TRAK1	SLC24A2	PPP1R16B	NEURL	NFASC	MIR326													SKI	ZNF692				VOPP1		P2RY8						SLC25A45	RPS27A		RAB11FIP1			TGM2	RAI1	OLFML2B									RRN3P3
TGFB2	TRDMT1	SLC31A2	PPP1R9B	NFASC	NFIA	MIR346													SLA					WASF2		PACSIN2						SLC35B1	RUNX3		RAB20			THRB	RALB	OLFML3									RTN4
TGFBI	TRIM8	SLC44A1	PPP2R1B	NFIB	NFIC	MIR3622B													SLAMF1					WDR1		PAG1						SLC35E2	S1PR1		RAB8A			TINAGL1	RAPGEF5	OSBP									RUNX1
TGIF1	TRIO	SLC45A3	PPP2R2A	NFIC	NFIX	MIR3649													SLC35B1					XCL2		PCBP1						SLC35E2B	SAMD3		RAC1			TM4SF1	RARA	PACSIN2									S100A10
THBS2	TSEN15	SLC48A1	PPP2R2C	NFIX	NFKBIA	MIR3911													SLC35E1					XIRP1		PFKFB4						SLC38A1	SAMHD1		RAI1			TM9SF3	RASSF6	PALM2									S100A11
THOC6	TSKU	SLC6A1	PPP2R4	NINJ2	NINJ2	MIR3935													SLC35E2B					XIRP2		PGS1						SLC39A10	SATB1		RALGDS			TMBIM1	RBM47	PARVA									S100A6
TM4SF1	TSPAN14	SLC9A1	PRCP	NIPAL3	NIPAL4	MIR4260													SLC38A1					YPEL2		PICALM						SLC6A6	SCML4		RAPGEF1			TMEM220	RCAN1	PAX7									SAMD4A
TM4SF4	TSPAN15	SLCO3A1	PREX1	NIPAL4	NKX2-2	MIR4269													SLC38A2					ZAK		PID1						SMAD3	SELPLG		RARA			TMEM41A	RGS3	PBX2									SAP30BP
TMEM217	TSPAN3	SMAD7	PRIMA1	NKAIN1	NKX6-2	MIR4274													SLC6A6					ZBTB16		PIK3AP1						SMAD7	SEMA4D		RASA3			TMEM45B	RHOU	PCDH1									SBNO2
TMEM44	TUSC5	SMARCE1	PRKCA	NKX2-2	NLGN3	MIR499													SLFN5					ZBTB7B		PIK3CB						SMAP2	2015-09-06		RCCD1			TMEM51	RIN2	PCDHGC4									SCHIP1
TMEM49	TWIST1	SMCR5	PRMT2	NKX6-2	NLN	MIR575													SMAD3					ZC3H4		PIK3R1						SMEK1	2015-09-09		RFX2			TMEM63A	RNASE4	PCF11									SDC1
TNFAIP1	TWIST2	SMNDC1	PROX1	NLN	NOTCH1	MIR577													SMAD7					ZCCHC24		PIK3R5						SMG6	SERPINB1		RGS3			TMPRSS2	RND3	PDE4B									SDC4
TNFRSF19	UBE2D3	SMURF1	PRPF40B	NOTCH1	NR1D1	MIR612													SMAP2					ZEB2		PILRA						SNORD53	SF3B1		RHOB			TMSB4X	RNF114	PDE4DIP									SEC22B
TNFRSF1A	UGP2	SNORA14B	PRUNE2	NPAS3	NR2F1	MIR638													SMNDC1					ZFAND5		PION						SORL1	SH2B3		RHPN2			TNFRSF1A	RNF186	PDGFB									SEMA3C
TNFSF18	USP24	SNRNP35	PTMA	NPC1	NR2F2	MIR641													SNORA14B					ZFHX3		PIP4K2A						SPEN	SH3BGRL3		RPH3AL			TNIP1	ROCK2	PDGFRB									SERPINB1
TNIP1	USP3	SNX22	PTPRD	NR4A1	NR4A1	MIR648													SNX20					ZFP36L1		PISD						SPTBN1	SH3BP2		RPLP0			TNS3	RREB1	PDLIM3									SERPINB5
TNRC18	UTRN	SORBS1	PTPRF	NTM	NRP2	MIR885													SNX9					ZMIZ1		PITPNA						SRGN	SIRPG		RPS6KA1			TOB1	RSPH1	PDXP									SERTAD2
TNS1	UTS2D	SORT1	PTPRJ	NTNG2	NTM	MIR9-1													SOCS3					ZMYND8		PIWIL4						SRSF3	SKAP1		RREB1			TPCN1	RUNX1	PER1									SETD5
TPM1	UVRAG	SOX2	PWWP2B	NUAK1	NTNG2	MITF													SOS1					ZNF366		PKM2						ST3GAL1	SKI		RSPH1			TPM1	SAP30BP	PEX2									SGCE
TPM4	VCL	SOX8	PYGB	OAF	NUAK1	MKNK2													SP100					ZNF423		PLAC8						ST3GAL5	SLA		RTKN			TRAF3IP2	SAR1B	PGS1									SGK1
TRAF3IP2	VEGFA	SPARCL1	PYGL	OLIG1	OAF	MMAB													SPAG9							PLAUR						ST6GALNAC4	SLAMF7		RUNX1			TRAM2	SCARB1	PHACTR2									SH3PXD2A
TRAK1	VGLL4	SPECC1	RAB30	OPALIN	OAZ2	MNT													SPATA13							PLEKHA2						ST8SIA4	SLC15A4		RXFP4			TRIM2	SCARB2	PHLDB1									SH3RF1
TRAM2	VPS13D	SPNS2	RAB40B	OTUD7A	OLIG1	MOBP													SPG11							PLEKHM1P						STAG2	SLC25A26		RXRA			TRIM38	SDC1	PHLDB2									SH3TC1
TRDMT1	WDR20	SPOCD1	RAB4A	OTUD7B	OPALIN	MORF4L2													SPOCK2							PLEKHO1						STAT4	SLC25A45		S100A6			TRIM8	SDCBP2	PIGV									SH3TC2
TRIM55	WISP3	SPPL3	RALGDS	PACS2	P2RX7	MPG													SPTBN1							PLEKHO2						STIM1	SLC2A3		SAP30BP			TSC22D1	SEMA3C	PITRM1									SHB
TRIM8	WNT11	SRCIN1	RAMP1	PADI2	PACS2	MPRIP													SREBF2							PLXDC2						STIM2	SLC35B1		SATB2			TSHZ1	SEMA6A	PKD1									SIPA1L3
TRIO	YAP1	SRD5A3	RANBP3	PAK4	PADI2	MRAS													SRGN							PLXND1						STK10	SLC35E2		SCARNA13			TSPAN8	2015-09-09	PKDCC									SIRPB2
TSPAN5	YPEL2	SREBF1	RAP1GAP	PALM2	PALM2	MRPL37													ST3GAL1							PPCDC						STK17A	SLC35E2B		SCARNA17			TTC22	SERINC5	PKM2									SKAP2
TTPAL	YWHAE	SRGAP2	RAPGEF1	PAQR8	PAQR8	MTCH1													ST6GAL1							PPIF						STK17B	SLC38A1		SDC1			TXNIP	SERPINB1	PLAU									SLC25A37
TXN2	ZAK	ST18	RAPGEF5	PCBP4	PCDH1	MTMR10													ST8SIA4							PPM1F						STK40	SLC44A2		SDC4			TYW1	SERPINB6	PLEC									SLC2A9
UACA	ZBTB16	ST3GAL4	RASA2	PCDH1	PCIF1	MTSS1L													STAT5B							PPP2R5C						SYNE2	SLC6A6		SDCBP2			TYW1B	SERPINH1	PLEKHA2									SLC38A1
UBC	ZBTB7B	ST3GAL5	RASA3	PCDH9	PCSK6	MTUS1													STIM1							PPP3R1						TAGAP	SLC7A6		SDCCAG1			UBC	SERTAD2	PLEKHG1									SLC38A2
UBE2D3	ZCCHC24	STMN1	RERE	PCSK6	PDE4DIP	MVK													STIM2							PPTC7						TAGLN2	SLFN12L		SEMA4B			UGCG	SESN2	PLEKHO1									SLCO3A1
UBE2V2	ZEB2	STMN4	RFFL	PDE1C	PDE8A	MXI1													STK10							PREX1						TARP	SLFN5		SENP3			UGT8	SESN3	PLEKHO2									SMAD3
UHRF1	ZFP36L1	SUN2	RGS3	PDE4B	PDGFA	MYBPHL													STK17B							PRKAG2						TBC1D22A	SMAD3		2015-09-09			UNC93A	SH3BP1	PLXNA2									SMAD7
VAMP3	ZMIZ1	SYNJ2	RHO	PDE4DIP	PDGFRB	MYH9													STK24							PRKCB						TBC1D2B	SMAD7		SERINC5			USH1C	SH3GL1	PLXNC1									SMOC1
VGLL3	ZNF217	TARBP1	RHOB	PDE8A	PDGFRL	MYO18A													STK4							PRKCD						TBCC	SMAP2		SERPINB1			USP12	SH3PXD2A	PLXND1									SNORA14B
VGLL4		TCF4	RHOBTB2	PDGFA	PDHB	MYO1E													STK40							PRSS8						TBX21	SMG6		SFN			VEGFA	SHB	PNMAL1									SNX33
VIM		TECPR2	RHOG	PDHB	PDPK1	MYOT													STX16							PSAP						TCF7	SNORA70G		SH2B3			VPS37B	SLC12A7	PNRC2									SOX9
VPS53		TEF	RNF220	PEA15	PEA15	NAA20													SUPT5H							PSIMCT-1						TES	SNORD35B		SH3BGRL3			WASF2	SLC15A1	PODXL									SPARC
WDR1		TFEB	RPS6KA1	PEX5L	PER1	NACAD													SURF4							PSTPIP1						TFEB	SNRK		SH3D20			WBP4	SLC16A5	POLR1E									SPATS2L
WDSUB1		THRA	RTDR1	PGBD5	PEX26	NAGLU													SYNGAP1							PTAFR						TGFBR2	SNTB1		SH3PXD2A			WWC1	SLC22A23	POMT1									SPINT2
WEE1		TJP1	RTN4	PGD	PEX5L	NAGPA													SYNJ2							PTGES3						TGIF1	SORL1		SHB			XPNPEP1	SLC22A4	POPDC3									SPP2
WLS		TMBIM1	RYBP	PGS1	PFKFB3	NAP1L4													SYTL3							PTK2B						THBS1	SP100		SHF			YY1	SLC22A7	PPAP2A									SPTBN1
WNT5A		TMCC2	SAMD4B	PHACTR3	PFKL	NAPA													SYVN1							PTP4A2						TIGIT	SPEN		SLC12A7			ZBTB38	SLC25A25	PPARGC1B									SQRDL
WWTR1		TMED10	SASH1	PHC2	PGBD5	NAV1													TAB2							PTPN1						TK2	SPTBN1		SLC16A5			ZC3H4	SLC25A45	PPM1F									SREBF1
ZBTB17		TMEM144	SCARB1	PHGDH	PGS1	NCAM1													TAF1B							PTPN12						TMBIM1	SREBF1		SLC22A23			ZCCHC14	SLC2A2	PPP1R10									SRGAP1
ZC3H12A		TMEM14E	SCARB2	PHLDA3	PHACTR3	NCOA7													TAGAP							PTPN2						TMEM140	SRGN		SLC25A10			ZFAND5	SLC2A8	PPP1R12B									SRGAP3
ZC3H4		TMEM184B	SCARNA13	PHLDB1	PHC2	NCOR2													TAGLN2							PTPN6						TMEM2	SRSF3		SLC25A25			ZFP36L1	SLC37A2	PPP1R15B									SRPK2
ZDHHC7		TMEM53	SCHIP1	PHLPP1	PHF15	NCRNA00200													TAP1							PTPRC						TMEM43	ST3GAL1		SLC38A2			ZFP36L2	SLC38A11	PRICKLE2									SSPN
ZFHX3		TMEM63A	SDCBP2	PHYHIPL	PHGDH	NCRNA00241													TATDN2							PTPRJ						TMEM50A	ST3GAL5		SLC45A3			ZMIZ1	SLC40A1	PRKACA									STAT4
ZFP36L1		TMTC4	SEC14L1	PI4KB	PHLDA3	NCS1													TBC1D10A							PTTG1IP						TMSB4X	ST8SIA4		SLC45A4			ZNF217	SLC6A6	PRKAR1A									STK17A
ZFP36L2		TNRC18	SEC14L2	PIGV	PHLDB1	NDE1													TBC1D2B							PTTG2						TNFAIP8	STAT1		SLC6A7			ZNF33B	SLC9A3	PRPF18									STK17B
ZFPM1		TOB1	SEC14L5	PIK3C2B	PHLPP1	NDRG1													TBCC							PWWP2B						TNFRSF1B	STAT4		SLC6A9			ZNF395	SLCO2B1	PRPF40B									STON2
ZHX3		TPCN1	SECISBP2	PIK3R1	PHYHIPL	NDST1													TBX21							PXK						TRAF1	STAT5B		SLC7A6			ZNF608	SMAD3	PRRX1									SUMO1P1
ZIC1		TPM1	SEMA4C	PIP4K2A	PI4KB	NDUFB9													TCF7							PXN						TRANK1	STIM1		SLC9A1			ZNF703	SMAD6	PTGFRN									SVIL
ZMIZ1		TPPP	SEMA6A	PLCG1	PIGV	NEK2													TGFBR2							RAB10						TREX1	STIM2		SLCO2B1			ZNF710	SMAD7	PTGIS									TARBP1
ZMYND8		TRAPPC10	SEPN1	PLEKHA1	PIK3C2B	NENF													TGIF1							RAB11FIP1						TRIB1	STK10		SMAD3			ZNF747	SMCR7L	PTMA									TBC1D14
ZNF217		TRIM62	2015-09-04	PLEKHB1	PIK3R1	NEURL													THAP2							RAB14						TRIM8	STK17A		SMAD7			ZZEF1	SNORA14B	PTRF									TBL1XR1
ZNF516		TRIM8	2015-09-08	PLEKHG3	PIK3R2	NFASC													TIFA							RAB27A						TRY6	STK17B		SNORA14B				SNORA45	PXDN									TEAD1
ZNF703		TSC22D3	2015-09-09	PLEKHH1	PIP4K2A	NFIA													TMBIM6							RAB2A						TSC22D3	STK4		SNORD17				SNORD17	PXN									TGFA
ZNF778		TSPAN14	SERINC5	PLLP	PLCG1	NFIB													TMC6							RAB31						TSPAN14	TAGAP		SNORD65				SNRPD3	R3HCC1									TGFBI
		TSPAN15	SERP2	PLOD1	PLD1	NFIC													TMEM173							RAB7A						TSPAN2	TAGLN2		SNX33				SOX13	RAB30									TGFBR2
		TSPAN5	SGK1	PLXDC2	PLEKHA1	NFIX													TMEM2							RAB8B						TSSK6	TARP		SOCS3				SP1	RAD51L1									THNSL1
		TTC7B	SH2D6	PLXNB1	PLEKHB1	NINJ2													TMEM50A							RAC1						TXK	TBC1D2B		SOLH				SPAG9	RAI1									THSD4
		TTLL11	SH3PXD2A	PLXND1	PLEKHG3	NIPAL3													TMEM66							RAC2						TXNIP	TBCC		SORBS3				SPATS2L	RALBP1									TIPARP
		TTYH2	SH3PXD2B	PMP22	PLEKHH1	NIPAL4													TMSB4X							RAF1						UBC	TBX21		SORL1				SPINT2	RALGDS									TJP2
		TUBA1A	SHANK3	PMS2P3	PLEKHO2	NISCH													TNF							RALY						UBE2E3	TCF7		SOX13				SPTBN1	RAPGEF1									TM4SF1
		TXNIP	SHISA4	POLR3H	PLIN3	NKAIN1													TNFAIP3							RAPGEF1						UCP3	TCTA		SPATA2				SREBF1	RARA									TMCC3
		TYRO3	SIK3	POMT2	PLLP	NLN													TNFAIP8							RAPGEF6						USP20	TES		SPEN				SRSF3	RASA3									TMEM154
		UBC	SIL1	POU3F3	PLOD1	NNMT													TNFRSF1A							RARA						USP3	TGFBR1		SPINT1				SRSF4	RBMS3									TMEM189-UBE2V1
		UNC5B	SIRPA	PPAP2B	PLXNB1	NOTCH1													TNFRSF1B							RASA3						UST	TGFBR2		SPIRE2				SSX2IP	RERE									TMEM211
		UNC5C	SLC1A3	PPFIBP2	PLXND1	NPHP4													TNFSF14							RASGEF1B						UTRN	TGIF1		SPNS2				ST14	RFX2									TMEM45B
		USP2	SLC22A23	PPIF	PMP22	NR1D1													TNFSF8							RASSF2						VIM	THEMIS		SPSB1				ST3GAL2	RGS10									TMEM49
		USP22	SLC24A2	PPM1H	PMS2P3	NR4A1													TNIP1							RASSF5						VPS37B	THRAP3		SPTBN1				ST6GALNAC1	RGS3									TMEM51
		USP36	SLC44A1	PPP1R14A	POLR3H	NRXN2													TOB1							RBM15						WBP2	TMEM109		SREBF1				STAMBPL1	RHOBTB3									TMOD3
		VASH1	SLC45A3	PPP1R16B	POMT2	NTM													TRAF1							RBM4						WIPF1	TMEM140		SREBF2				STAT5A	RHOC									TMSB10
		VGLL4	SLC6A1	PPP2R1B	POU3F2	NTRK2													TRAF2							RBM47						XCL2	TMEM2		SSBP3				STK24	RHOQ									TMTC1
		WDFY2	SLC6A9	PPP2R2B	POU3F3	NUAK1													TRAF3							RBMS1						ZAP70	TMEM43		SSBP4				STK40	RIN3									TNFAIP3
		WDR20	SLC9A1	PPP2R2C	PPFIBP2	OAF													TRAF3IP3							RCAN1						ZBP1	TMEM66		ST14				STX3	RNF122									TNK2
		WDR37	SLCO2B1	PPP2R4	PPP1R14A	OLFM1													TRIB2							RCBTB2						ZBTB1	TMSB4X		ST5				STXBP6	ROCK2									TNKS1BP1
		WWP2	SMAD7	PRCC	PPP1R16B	OLIG1													TRIM8							RCSD1						ZBTB16	TNFAIP3		ST6GALNAC1				SULT1A1	RPS6KA2									TNS4
		YPEL2	SMAP2	PREX1	PPP2R1B	OPALIN													TRPV2							RELT						ZBTB7A	TNFAIP8		STARD10				SULT1C2	RREB1									TOB1
		YWHAH	SMCR5	PRIMA1	PPP2R4	OSBPL1A													TSEN34							RFFL						ZC3H12A	TNFRSF1B		STK16				SUPT4H1	RTN4									TOM1L2
		ZBTB16	SMNDC1	PRKCA	PREX1	OTUD7A													TSPAN14							RGAG4						ZC3H4	TNIP3		STK24				SUSD1	RUNDC2C									TP63
		ZBTB17	SMOX	PRMT2	PRIMA1	P2RX7													TSSK6							RHBDF2						ZC3HAV1	TPP2		STK40				TARBP1	RUNX1T1									TRAF3IP2
		ZBTB47	SMURF1	PROX1	PRKCSH	P4HTM													TTC39B							RHOQ						ZDHHC18	TRA2B		SUV420H1				TBC1D1	RUSC2									TRIB1
		ZCCHC24	SNORA14B	PRPF40B	PRMT2	PADI2													TTC39C							RILPL2						ZEB2	TRAF1		SYVN1				TBC1D14	RXRA									TRIB2
		ZEB2	SNORD62B	PRR18	PROX1	PALM2													UBAC2							RIN2						ZFP36	TRAF3IP3		TACC2				TBC1D16	S1PR2									TRIM16
		ZFHX2	SNX9	PRR5L	PRPF40B	PAQR8													UBASH3A							RIN3						ZFP36L2	TRANK1		TBC1D1				TBC1D2	SAMD4A									TRIO
		ZFP36	SORBS1	PRUNE2	PRR18	PBOV1													UBC							RNASEH2B						ZNF217	TRERF1		TBC1D14				TBC1D2B	SASH1									TSC22D1
		ZHX2	SORBS3	PSEN1	PRUNE2	PCDH1													UBE2V1							RNF135						ZNF395	TRIB1		TBC1D2B				TBL1XR1	SCARB2									TSC22D3
		ZHX3	SORCS2	PTN	PSAP	PCDH9													UBTF							RNF144B						ZNF80	TRIM39		TCAP				TCF7L2	SCHIP1									TTC14
		ZNF334	SORT1	PTPN23	PTMA	PDE1C													UCP3							RNF4						ZNF831	TRIM41		TCEA3				TEAD1	SCMH1									TXNRD1
		ZNF532	SOX10	PTPRB	PTPRD	PDE4B													UNC13D							RPS9							TRIM8		TCP11				TEP1	SCML4									UBE2D3
		ZNF536	SOX12	PTPRD	PTPRF	PDE4DIP													USP20							RREB1							TSPAN14		TEF				TFEB	SCN4A									UGCG
		ZNF608	SOX2	PTPRF	PTPRJ	PDE8A													USP3							RRP12							TTC39B		TFEB				TFEC	SDC2									UPP1
			SPARC	PTPRJ	PTPRK	PDHB													VAMP1							RTN4							U2AF2		TGIF1				TFF3	SDCCAG1									VDAC2
			SPATA13	PVRL1	PVRL1	PDK2													VOPP1							RUNDC2C							UBAP2L		TINAGL1				TGIF1	SEC14L1									VEGFC
			SPATA2	PXK	PXN	PEX5L													WDR1							RUNX1							UBC		TJP3				TGM2	SEC22B									VIM
			SPECC1	PYGB	PYGB	PGBD5													WHSC1L1							RXRA							UBE2D3		TK2				THOC2	SELPLG									VPS4B
			SPNS2	QDPR	QDPR	PHACTR3													WIPF1							S100A12							UBE2E3		TMEM105				TM9SF3	2015-09-11									WASF2
			SPPL3	QKI	RAB11FIP4	PHC2													XBP1							SAMHD1							UCP2		TMEM106C				TMEM105	2015-09-04									WEE1
			SPSB1	RAB11FIP4	RAB30	PHLDA3													XPO6							SAMSN1							UNC13D		TMEM125				TMEM125	2015-09-09									WIBG
			SPTBN1	RAB30	RAB3IL1	PHLDB1													ZAP70							SASH3							USF1		TMEM141				TMEM220	SERINC5									WWC1
			SRCIN1	RAB40B	RAB40B	PHLPP1													ZBED4							SBF2							USP20		TMEM181				TMEM37	SERPINH1									XDH
			SSBP3	RAB4A	RAB4A	PHYHIPL													ZBTB1							SCARB1							USP3		TMEM184A				TMEM45B	SETD5									YTHDC1
			SSH1	RALGDS	RABL2B	PI4KB													ZBTB17							SCGB1A1							UTRN		TMEM37				TMEM51	SFTA1P									YWHAZ
			ST3GAL4	RANBP3	RALGDS	PICALM													ZBTB32							SDCBP							VAMP1		TMPRSS2				TMPRSS2	SH3GL1									ZAK
			ST3GAL5	RAP1GAP	RAMP1	PIGV													ZBTB7A							SDCCAG8							VANGL2		TMSB10				TMSB4X	SH3PXD2B									ZBED2
			STK40	RAPGEF2	RANBP3	PIK3C2B													ZBTB7B							SDHB							VDAC2		TNIP1				TNS3	SHC1									ZBTB17
			STMN1	RAPGEF6	RAP1GAP	PIK3IP1													ZC3H12A							SEC22B							VPS37B		TNKS1BP1				TOB1	SHROOM3									ZC3H12C
			STMN4	RASA2	RAPGEF1	PIK3R1													ZC3H12D							SEC62							WDR1		TNRC18				TPCN1	SIK1									ZFP36L1
			SUN2	RASA3	RAPGEF5	PIP4K2A													ZC3HAV1							SELO							WDR37		TNS3				TRAF3IP2	SIX1									ZFP36L2
			SYNJ2	RASAL1	RARA	PISD													ZFP1							SELPLG							WHSC1L1		TOB1				TRAK1	SLC25A25
			SYNPO	RASGRP3	RASA2	PITPNM2													ZFP36							SEMA4A							WIPF1		TPCN1				TRAM2	SLC27A3
			SYT11	RASSF2	RASA3	PLA2G16													ZFP36L1							SEMA4D							XCL2		TPPP				TRIM2	SLC38A6
			TALDO1	RBPJ	RASAL1	PLCG1													ZFP36L2							2015-09-09							XPO6		TPPP3				TRIM38	SLN
			TBC1D2B	RERE	RASL12	PLD1													ZNF192							SERINC5							YWHAZ		TRAF3IP2				TRIM8	SMAD1
			TCF12	RFFL	RASSF2	PLEKHF1													ZNF217							SERPINA1							ZAP70		TRAF4				TSC22D1	SMAD3
			TCF4	RGS3	RERE	PLEKHG3													ZNF267							SERPINB2							ZBTB1		TRAF7				TSHZ1	SMAD7
			TEF	RHOB	RFFL	PLEKHH1													ZNF764							SESN3							ZBTB2		TREX1				TSPAN8	SMARCD3
			TESC	RHOG	RGS3	PLEKHO2													ZNF778							SETD5							ZBTB22		TRIB1				TTC22	SMARCE1
			TFEB	RLBP1	RHBDF2	PLLP													ZNF831							SFMBT2							ZBTB7A		TRIM14				TTC39B	SMCR5
			THBS2	RNF130	RHOBTB2	PLOD1																				SGK1							ZC3H4		TRIM2				TUBB2A	SMG6
			TIAF1	RNH1	RHOG	PLP1																				SGK3							ZC3HAV1		TRIM25				TYW1	SMTN
			TIE1	RPP14	RNF220	PLXNB1																				SGMS2							ZDHHC18		TRIM69				TYW1B	SNAI2
			TIMP2	RPS24	RNH1	PLXND1																				SGSM3							ZEB2		TRIM8				UBC	SNORA14B
			TJP1	RTN4	RPS6KA1	PM20D1																				SH2B3							ZFC3H1		TRIOBP				UGCG	SNX33
			TKT	RUSC2	RRBP1	PMP22																				SH2D3C							ZFP36		TSHZ1				UGT8	SNX5
			TMC6	RYBP	RRN3	PMS2P3																				SH3BGRL3							ZFP36L1		TSKU				UPK3A	SOCS3
			TMCC2	SALL1	RRP7A	POC1A																				SH3BP2							ZFP36L2		TSPAN1				USH1C	SOD2
			TMED10	SAMD4B	RTN4	POLR3H																				SH3BP5							ZHX2		TSPAN14				USP12	SORBS1
			TMEM144	SASH1	RUSC2	POMT2																				SH3KBP1							ZNF217		TSPAN15				VDAC1	SORBS3
			TMEM165	SCARB1	RXRA	POU3F3																				SIGLEC9							ZNF80		TSSK6				VEGFA	SOX12
			TMEM184B	SCARB2	RYBP	PPFIBP1																				SIK3							ZNF831		TTC39A				VPS37B	SOX4
			TMEM53	SCHIP1	SAMD4B	PPFIBP2																				SIRPA							ZSCAN10		TTYH3				WASF2	SP2
			TMEM63A	SDCCAG8	SASH1	PPIF																				SLA									TXNIP				WEE1	SP3
			TMTC4	SEC14L1	SCARB2	PPM1H																				SLC15A4									UBC				WSB2	SPARC
			TNFRSF1B	SEC14L2	SCD	PPP1R16B																				SLC16A6									UBE2H				XBP1	SPATA12
			TNIK	SEC14L5	SCHIP1	PPP1R9B																				SLC17A5									UCKL1-AS1				XPNPEP1	SPEG
			TNK2	SELPLG	SEC14L1	PPP2R1B																				SLC19A1									ULK4				YY1	SPEN
			TNS1	SEMA4D	SEC14L2	PPP2R2A																				SLC20A1									UNC5B				ZBTB38	SPRED1
			TOB1	SEMA6A	SEC14L5	PPP2R2C																				SLC22A15									UPK3B				ZBTB7A	SPRED2
			TPCN1	SEMA7A	SELM	PPP2R4																				SLC22A4									USP12				ZC3H12A	SPRY1
			TPPP	2015-09-04	SEMA4D	PREX1																				SLC24A4									USP7				ZC3H4	SPRY2
			TRAF1	2015-09-07	SEMA6A	PRKCA																				SLC25A25									VASP				ZCCHC14	SPRY4
			TRIM62	2015-09-08	SEMA7A	PROX1																				SLC25A37									VDR				ZFP36L1	SPSB4
			TRIM8	2015-09-09	2015-09-07	PRPF40B																				SLC27A3									VEGFA				ZFP36L2	SPTB
			TRPV3	SERHL	SEPW1	PRR18																				SLC2A3									VIPR1				ZFP91-CNTF	SPTBN1
			TSC22D3	SERINC5	SERINC5	PRUNE2																				SLC35B1									VOPP1				ZFPM1	SRGAP2
			TSC22D4	SERP2	SERPINH1	PSAP																				SLC35E1									VPS37B				ZMIZ1	SRL
			TSPAN14	SGK1	SGK1	PSEN1																				SLC38A2									WASF2				ZNF395	SSBP3
			TSPAN15	SGK3	SGTA	PSMC1																				SLC46A2									WDR1				ZNF415	SSBP4
			TSPAN5	SGMS1	SH2B3	PSRC1																				SLC6A6									WDR25				ZNF608	SSH1
			TTC7B	SGTA	SH2D6	PTK2B																				SLC7A7									WDR34				ZNF706	STARD13
			TTLL11	SH2D6	SH3BP1	PTMA																				SLC9A1									WNK2				ZNF710	STARD9
			TTLL4	SH3BP4	SH3BP4	PTN																				SLC9A8									XRCC3				ZNF747	STAT5A
			TTYH1	SH3GL3	SH3GL1	PTPRB																				SLCO3A1									ZBTB7A				ZNF775	STK11
			TTYH2	SH3PXD2B	SH3GLB2	PTPRF																				SMAD3									ZBTB7B				ZNF91	STK40
			TUBA1A	SHB	SH3PXD2B	PTPRJ																				SMAP2									ZBTB7C				ZZEF1	STOM
			TYRO3	SHISA4	SHB	PTPRK																				SMCHD1									ZC3H12A					STOML1
			UBC	SHROOM1	SHISA7	PVRL1																				SMEK1									ZC3H4					SUN1
			UNC5B	SIK3	SHROOM1	PXK																				SMG7									ZFP36					SUSD1
			UNC5C	SIRPA	SIK3	PYGB																				SNORA14B									ZFP36L2					SYNGAP1
			USP2	SKI	SIRPA	PYGL																				SNORA67									ZFPM1					SYNJ2
			USP22	SLC1A3	SLC22A15	QKI																				SNORD56B									ZMIZ1					SYNPO
			USP54	SLC22A15	SLC22A23	RAB11FIP4																				SNRK									ZNF219					TACC1
			VASH1	SLC22A23	SLC24A2	RAB30																				SNRPA									ZNF281					TACC2
			VGLL4	SLC24A2	SLC26A9	RAB40B																				SNX1									ZNF519					TARBP1
			VPS37B	SLC27A1	SLC27A1	RAB4A																				SNX10									ZNF710					TBC1D1
			VSTM2B	SLC31A2	SLC31A2	RAB7A																				SNX18									ZNF787					TBC1D16
			WDFY2	SLC35C2	SLC44A1	RABL2B																				SNX27									ZYX					TBC1D2B
			WDR1	SLC41A1	SLC45A3	RALGDS																				SORL1									ZZEF1					TBCD
			WDR20	SLC44A1	SLC48A1	RANBP3																				SP100														TBL1XR1
			WDR37	SLC45A3	SLC6A1	RAP1GAP																				SP3														TBX15
			YKT6	SLC48A1	SLC6A6	RAP2A																				SPEN														TCF4
			YPEL2	SLC5A11	SLCO3A1	RAPGEF5																				SPI1														TCF7L2
			ZBTB16	SLC6A1	SMAD6	RAPGEF6																				SPTBN5														TFAP4
			ZBTB17	SLC6A9	SMAD7	RARA																				SPTLC2														TGFB2
			ZBTB47	SLCO3A1	SMARCE1	RASA2																				SQRDL														TGFBI
			ZBTB7A	SMAD7	SMCR5	RASA3																				SRGAP2P2														TGFBR3
			ZBTB7B	SMCR5	SMPD1	RASAL1																				SRGN														TGIF1
			ZC3H4	SMNDC1	SNORA14B	RERE																				SSH1														TGOLN2
			ZCCHC24	SMOX	SNORD62B	RFFL																				ST14														THBS1
			ZDHHC11	SMPD1	SNX22	RGS3																				ST3GAL1														THBS2
			ZEB2	SNORA14B	SOCS3	RHBDL3																				ST3GAL6														THY1
			ZFHX3	SNRNP35	SORBS1	RHOB																				ST8SIA4														TIMP2
			ZFP36L1	SNX22	SORT1	RIMS3																				STAT1														TM2D1
			ZFP36L2	SNX30	SOX10	RLBP1																				STIM1														TMEM105
			ZFYVE21	SNX9	SOX12	RNF152																				STK10														TMEM182
			ZHX2	SORBS1	SOX13	RNU4ATAC																				STK24														TMPO
			ZMIZ1	SORBS3	SOX2	RP1L1																				STK4														TNFRSF1A
			ZNF334	SOX12	SOX8	RPL19P12																				STK40														TNIP1
			ZNF365	SOX2	SPARC	RPL30																				STT3B														TNK2
			ZNF532	SPATA13	SPATA13	RPS6KA1																				STX11														TNNT3
			ZNF536	SPECC1	SPECC1	RTN4																				SULF2														TNRC18
			ZNF608	SPG20	SPNS2	RTN4R																				SUMO1P1														TNS1
			ZNF775	SPNS2	SPOCD1	RTN4RL1																				SUMO4														TOB1
			ZSWIM6	SPOCD1	SPSB1	RUSC2																				SYK														TP53BP1
				SPOCK1	SRCIN1	RYBP																				SYTL3														TPCN1
				SPPL3	SREBF1	S100B																				TAB2														TRA2B
				SPSB1	SSBP3	SASH1																				TACC1														TRAF3IP2
				SPTLC2	SSH1	SCARB1																				TAGAP														TRAK1
				SRCIN1	ST18	SCARB2																				TANK														TRAM2
				SRGAP2	ST3GAL4	SCARNA3																				TBC1D2														TRAPPC3
				SRSF5	ST3GAL5	SCHIP1																				TBC1D22A														TREX1
				SSBP3	STARD3	SDCCAG8																				TBC1D2B														TRIB1
				ST3GAL4	STH	SEC14L1																				TBXAS1														TRIB2
				ST3GAL5	STK40	SEC14L2																				TET2														TRIM55
				STARD13	STMN1	SEMA4D																				TET3														TRIM8
				STMN1	STMN4	SEMA6A																				TGFBI														TSPAN15
				STMN4	STX10	SEMA7A																				TGFBR2														TSPAN9
				SUN2	SUN2	SEPN1																				TGIF1														TSSK6
				SYNJ2	SUSD2	2015-09-04																				THAP2														TTN
				TAB1	SYNJ2	2015-09-07																				TIMP2														TTYH3
				TALDO1	SYNPO	2015-09-09																				TK2														TUBA1A
				TBCA	TAB1	SERINC5																				TKT														TUBG2
				TCF12	TARBP1	SERP2																				TLE4														UBAC1
				TCF4	TBC1D10A	SFSWAP																				TLR1														UBC
				TECPR2	TBC1D2B	SGK1																				TLR2														UBTF
				TF	TBCA	SGMS1																				TM9SF4														USP2
				TFEB	TCF4	SH2B3																				TMED10														UTP11L
				THBS2	TECPR2	SH2D6																				TMEM140														VAPA
				TIE1	TEF	SH3GL1																				TMEM170B														VASH2
				TIMP2	TF	SH3GL3																				TMEM189-UBE2V1														VCAN
				TJP1	TFEB	SH3PXD2B																				TMEM218														VGLL3
				TJP2	THBS2	SHISA4																				TMSB4X														VGLL4
				TMC6	THRA	SIK3																				TNFAIP2														VPS37B
				TMCC2	TIAF1	SIL1																				TNFAIP8														VPS53
				TMCC3	TIMP2	SIRPA																				TNFRSF10B														WDR1
				TMED10	TJAP1	SKI																				TNFRSF1A														WDR44
				TMEFF2	TJP1	SLAIN1																				TNFRSF1B														WDR74
				TMEM144	TK2	SLC1A3																				TNFSF13B														WHSC1L1
				TMEM165	TKT	SLC22A15																				TNIP1														WIPI1
				TMEM181	TMBIM1	SLC22A23																				TNK2														WISP3
				TMEM184B	TMC6	SLC24A2																				TNRC18														WWTR1
				TMEM53	TMCC2	SLC25A25																				TNS3														XIRP1
				TMEM63A	TMED10	SLC27A1																				TOP3A														YPEL2
				TMEM90B	TMEM144	SLC30A5																				TPCN1														ZCCHC24
				TMTC2	TMEM160	SLC44A1																				TPCN2														ZCCHC6
				TMTC4	TMEM165	SLC45A3																				TRAF3IP3														ZEB2
				TNK2	TMEM184B	SLC48A1																				TRAPPC3														ZFHX4
				TNS1	TMEM189-UBE2V1	SLC6A1																				TREM1														ZFP36
				TOB1	TMEM53	SLC7A14																				TRERF1														ZFP36L1
				TPCN1	TMEM8C	SLC9A1																				TRIM14														ZFP36L2
				TPPP	TMEM90B	SLCO3A1																				TRIM27														ZMIZ1
				TRAF1	TMTC4	SMAD7																				TRIM55														ZMYND8
				TRAF4	TNFRSF1A	SMARCE1																				TRIM8														ZNF213
				TRAFD1	TNFRSF1B	SMCR5																				TRIT1														ZNF217
				TRAPPC10	TNK2	SMNDC1																				TSPAN14														ZNF264
				TRAPPC9	TNS1	SMOX																				TTC19														ZNF395
				TRIM2	TOB1	SMPD1																				TTLL4														ZNF423
				TRIM59	TPCN1	SNORA14B																				TXLNB														ZNF438
				TRIM62	TPPP	SNORA45																				TXNIP														ZNF516
				TRIM8	TRAF1	SNPH																				UACA														ZNF608
				TSC22D3	TRAFD1	SNRNP35																				UBC														ZNF787
				TSPAN14	TRAPPC10	SNRPA1																				UBE2D3
				TSPAN15	TRAPPC9	SNX22																				UBE2R2
				TSPAN5	TRIM2	SNX9																				UBP1
				TTC7B	TRIM62	SORBS1																				UBXN2B
				TTLL11	TRIM8	SORCS2																				UCK2
				TTLL7	TRMT61A	SORL1																				UGGT1
				TTYH2	TSC22D3	SORT1																				UPP1
				TUBA1A	TSPAN14	SOX10																				USP10
				TYMS	TSPAN15	SOX12																				USP15
				TYRO3	TSPAN5	SOX2																				USP3
				UBC	TTC7B	SOX8																				USP32
				UBE2V1	TTYH2	SPATA2																				USP48
				UBE4B	TUBB4	SPECC1																				UTRN
				UNC5B	TYRO3	SPINT2																				VAV2
				UNC5C	UBC	SPNS2																				VCAN
				USP12	UBE3B	SPOCK1																				VCL
				USP22	UMPS	SPPL3																				VIM
				USP54	UNC5B	SPSB1																				WAC
				UTP18	UNC5C	SPTBN1																				WARS
				VASH1	USP2	SPTLC2																				WASF2
				VGLL4	USP22	SRCIN1																				WDFY1
				VPS37B	VASH1	SRGAP3																				WDFY2
				VSTM2B	VGLL4	SSH1																				WDR37
				WASF2	VPS37B	ST18																				WIPF1
				WDFY2	VSTM2B	ST3GAL1																				WSB1
				WDR20	WDR20	ST3GAL4																				WTAP
				WDR37	WDR37	ST3GAL5																				XPO6
				WISP2	WISP2	STARD13																				XYLT1
				WNK1	XRCC3	STK35																				YPEL2
				WWP2	YPEL2	STMN4																				YWHAG
				YPEL2	ZBTB16	SUDS3																				ZBTB7A
				ZBTB16	ZBTB17	SYNJ2																				ZC3H7A
				ZBTB17	ZBTB47	SYNPO																				ZC3HAV1
				ZBTB7A	ZBTB7A	SYT11																				ZDHHC7
				ZCCHC24	ZBTB7B	TARBP1																				ZEB2
				ZEB2	ZC3H4	TATDN2																				ZFP36
				ZFP36L2	ZCCHC24	TBCA																				ZFP36L1
				ZHX2	ZDHHC11	TCF12																				ZFP36L2
				ZMIZ1	ZEB2	TCF4																				ZNF217
				ZNF334	ZFHX3	TECPR2																				ZNF267
				ZNF532	ZFP36	TEF																				ZNF330
				ZNF536	ZFP36L2	TF																				ZNF385A
				ZNF608	ZHX2	TFEB																				ZNF395
				ZNF706	ZIC4	THBS2																				ZNF516
				ZNF775	ZIC5	THRA																				ZNF592
				ZNF778	ZMIZ1	THSD1P1																				ZNF710
				ZSWIM6	ZNF334	TIAM1
				ZZZ3	ZNF536	TIMM22
					ZNF710	TIMP2
					ZNF778	TJAP1
					ZYX	TJP1
					ZZZ3	TKT
						TMC6
						TMCC2
						TMED10
						TMEFF2
						TMEM123
						TMEM144
						TMEM165
						TMEM184B
						TMEM194B
						TMEM53
						TMEM63A
						TMEM90B
						TMTC2
						TMTC4
						TNK2
						TNS1
						TOB1
						TOLLIP
						TOM1L2
						TPCN1
						TPPP
						TRAF1
						TRAF4
						TRAFD1
						TRAPPC10
						TRIM62
						TRIM8
						TRIM9
						TSC22D1
						TSC22D3
						TSPAN14
						TSPAN15
						TSPAN5
						TTC7B
						TTLL11
						TTLL7
						TTYH1
						TTYH2
						TUBA1A
						TUBB4
						TULP4
						UBC
						UBE2V1
						UBE4B
						UNC5B
						UNC5C
						USP2
						USP22
						USP35
						UTP18
						UVRAG
						VASH1
						VEZF1
						VGLL4
						VPS37B
						VSTM2B
						WASF2
						WDFY2
						WDR20
						WDR45L
						WIPF1
						WISP2
						WNK1
						WRNIP1
						WWP2
						XPNPEP1
						YPEL2
						YWHAH
						YWHAQ
						ZBTB16
						ZBTB17
						ZBTB47
						ZBTB7A
						ZBTB7B
						ZC3H4
						ZCCHC24
						ZDHHC11
						ZDHHC22
						ZEB2
						ZHX2
						ZHX3
						ZNF334
						ZNF365
						ZNF532
						ZNF536
						ZNF608
						ZNF638
						ZNF706
						ZNF778
[truncated: 34 more columns]
