# Supplementary material for: Models of human core transcriptional regulatory circuitries
Source: HighWire-hosted journal article supplement (doi:10.1101/gr.197590.115), 2016-02-03
Supplement: Table_S4.xlsx [file Table_S4.xlsx]

## Sheet: Oct4KDregGenesxH1CRCTargets
Table S4. List of H1 CRC SE-assigned target genes whose expression is modified after POU5F1/OCT4 knock-down in H1 hESCs
DKK1
LEPREL1
ID3
CITED2
CDK6
NUAK2
MAPK10
NUAK2
NRP2
SLC2A14
ELMO1
ID1
CGNL1
NEBL
NRP2
FZD7
SOCS3
DDIT4
NRP2
PLS3
TMEM30A
RARB
ID1
SOX11
NDST1
ASPH
BTBD3
SLC9A3R1
NCOR2
NEBL
LPHN2
MAPK10
SLC2A3
PLS3
RTP1
GNAS
DPYSL3
TARS
ZNF649
BCL11A
B3GAT1
GPR176
HIST1H4K
HK1
ZNF462
ZFHX2
BCOR
CA14
UGP2
SMARCA2
PCDH11X
PPM1B
CLYBL
AEBP2
FABP6
PPM1B
RBPMS
RBPJ
UGT8
TRERF1
RTN4IP1
MTA3
PODXL
PODXL
B3GAT1
BCL11A
CYP2S1
VCAN
GPRC5B
COBL
PPAP2B
DAZL
MIAT
VASH2
AKAP7
BNC2
TRIM71
TERF1
PIF1
SALL2
JARID2
PPAP2B
OLFML3
SORL1
CYP2S1
RBPJ
SORL1
DNMT3B
SCGB3A2
ZNF398
SYT6
RARRES3
DAZL
CHN1
DPPA4
DNMT3B
PHC1
PRDM14
DNMT3B
PRODH
AASS
FAM46B
SOX2
ZSCAN10
SEPHS1
NANOG
SOX2
AASS
SEPHS1
TERF1
POU5F1
