# Supplementary material for: Models of human core transcriptional regulatory circuitries
Source: HighWire-hosted journal article supplement (doi:10.1101/gr.197590.115), 2016-02-03
Supplement: TableS6.xlsx [file TableS6.xlsx]

## Sheet: TargetScan_Results
Table S6: miRNA target predictor software results for MIR-371-5p - TargetScan V7.0 (August 2015 release) - top 100 results
Target gene	Representative transcript	Gene name	BCCIP	ENST00000368759.5	BRCA2 and CDKN1A interacting protein	869	Sites in UTR	2	2	0	0	0	hsa-miR-371a-5p	-0.78	-0.78	N/A	2009
				SPANXC	ENST00000358993.2	SPANX family, member C	5	Sites in UTR	1	1	0	0	0	hsa-miR-371a-5p	-0.78	-0.78	N/A
SPANXD	ENST00000370515.3	SPANX family, member D	5	Sites in UTR	1	1	0	0	0	hsa-miR-371a-5p	-0.75	-0.75	N/A
SPANXB2	ENST00000449283.1	SPANX family, member B2	5	Sites in UTR	1	1	0	0	0	hsa-miR-371a-5p	-0.73	-0.73	N/A
SPANXB1	ENST00000370530.1	SPANX family, member B1	5	Sites in UTR	1	1	0	0	0	hsa-miR-371a-5p	-0.73	-0.73	N/A
SPANXA1	ENST00000370519.3	sperm protein associated with the nucleus, X-linked, family member A1	5	Sites in UTR	1	1	0	0	0	hsa-miR-371a-5p	-0.72	-0.72	N/A
SPANXA2	ENST00000370518.3	SPANX family, member A2	5	Sites in UTR	1	1	0	0	0	hsa-miR-371a-5p	-0.72	-0.72	N/A
BTG3	ENST00000339775.6	BTG family, member 3	3656	Sites in UTR	1	0	0	1	0	hsa-miR-371a-5p	-0.71	-0.71	N/A	2007, 2009, 2011
BECN1	ENST00000438274.3	beclin 1, autophagy related	2879	Sites in UTR	1	1	0	0	0	hsa-miR-371a-5p	-0.68	-0.68	N/A	2009, 2011
GJD4	ENST00000321660.1	gap junction protein, delta 4, 40.1kDa	5	Sites in UTR	2	2	0	0	1	hsa-miR-371a-5p	-0.66	-0.66	N/A
SPANXN5	ENST00000375511.3	SPANX family, member N5	5	Sites in UTR	1	1	0	0	0	hsa-miR-371a-5p	-0.65	-0.65	N/A
LINC00692	ENST00000451284.1	long intergenic non-protein coding RNA 692	5	Sites in UTR	2	1	0	1	0	hsa-miR-371a-5p	-0.64	-0.64	N/A
METTL17	ENST00000382985.4	methyltransferase like 17	418	Sites in UTR	1	1	0	0	0	hsa-miR-371a-5p	-0.58	-0.58	N/A
VNN3	ENST00000392393.3	vanin 3	5	Sites in UTR	1	0	1	0	0	hsa-miR-371a-5p	-0.52	-0.52	N/A	2007, 2009
CCDC23	ENST00000372522.1	coiled-coil domain containing 23	17	Sites in UTR	1	0	0	1	0	hsa-miR-371a-5p	-0.52	-0.62	N/A	2011
SLC25A51	ENST00000380590.3	solute carrier family 25, member 51	170	Sites in UTR	4	3	1	0	3	hsa-miR-371a-5p	-0.51	-0.54	N/A
CST9L	ENST00000376979.3	cystatin 9-like	5	Sites in UTR	1	1	0	0	0	hsa-miR-371a-5p	-0.5	-0.5	N/A
NETO1	ENST00000327305.6	neuropilin (NRP) and tolloid (TLL)-like 1	5	Sites in UTR	0	0	0	0	2	hsa-miR-371a-5p	-0.5	-0.61	N/A	2011
PLCB1	ENST00000378641.3	phospholipase C, beta 1 (phosphoinositide-specific)	21	Sites in UTR	1	1	0	0	2	hsa-miR-371a-5p	-0.48	-0.48	N/A	2007
PRR13	ENST00000549068.1	proline rich 13	387	Sites in UTR	6	1	0	5	1	hsa-miR-371a-5p	-0.46	-0.52	N/A
NGRN	ENST00000379095.3	neugrin, neurite outgrowth associated	1754	Sites in UTR	1	1	0	0	0	hsa-miR-371a-5p	-0.46	-0.46	N/A
TSPAN31	ENST00000547992.1	tetraspanin 31	72	Sites in UTR	2	1	0	1	0	hsa-miR-371a-5p	-0.45	-0.65	N/A	2009, 2011
MS4A12	ENST00000016913.4	membrane-spanning 4-domains, subfamily A, member 12	10	Sites in UTR	1	1	0	0	0	hsa-miR-371a-5p	-0.45	-0.45	N/A
PSMG3	ENST00000288607.2	proteasome (prosome, macropain) assembly chaperone 3	4378	Sites in UTR	1	1	0	0	0	hsa-miR-371a-5p	-0.44	-0.44	N/A
RNF182	ENST00000488300.1	ring finger protein 182	1122	Sites in UTR	1	0	1	0	3	hsa-miR-371a-5p	-0.44	-0.44	N/A
EVI2B	ENST00000330927.4	ecotropic viral integration site 2B	5	Sites in UTR	1	1	0	0	0	hsa-miR-371a-5p	-0.44	-0.44	N/A
IDNK	ENST00000405990.3	idnK, gluconokinase homolog (E. coli)	137	Sites in UTR	2	1	1	0	0	hsa-miR-371a-5p	-0.44	-0.44	N/A
NEK3	ENST00000339406.3	NIMA-related kinase 3	66	Sites in UTR	1	1	0	0	2	hsa-miR-371a-5p	-0.42	-0.42	N/A
APOBEC3D	ENST00000216099.8	apolipoprotein B mRNA editing enzyme, catalytic polypeptide-like 3D	5	Sites in UTR	3	1	1	1	0	hsa-miR-371a-5p	-0.4	-0.4	N/A
COPS4	ENST00000509093.1	COP9 signalosome subunit 4	3501	Sites in UTR	1	1	0	0	0	hsa-miR-371a-5p	-0.4	-0.4	N/A
RP11-455G16.1	ENST00000326780.3	Uncharacterized protein	5	Sites in UTR	2	1	0	1	1	hsa-miR-371a-5p	-0.4	-0.4	N/A
SRSF3	ENST00000373715.6	serine/arginine-rich splicing factor 3	2593	Sites in UTR	2	0	0	2	4	hsa-miR-371a-5p	-0.4	-0.42	N/A	2007, 2009, 2011
DHRS11	ENST00000251312.5	dehydrogenase/reductase (SDR family) member 11	17	Sites in UTR	1	1	0	0	0	hsa-miR-371a-5p	-0.4	-0.4	N/A
HYLS1	ENST00000425380.2	hydrolethalus syndrome 1	54	Sites in UTR	1	1	0	0	0	hsa-miR-371a-5p	-0.39	-0.39	N/A
SLC25A33	ENST00000302692.6	solute carrier family 25 (pyrimidine nucleotide carrier), member 33	2021	Sites in UTR	2	0	0	2	1	hsa-miR-371a-5p	-0.39	-0.41	N/A
SOX2	ENST00000325404.1	SRY (sex determining region Y)-box 2	506	Sites in UTR	0	0	0	0	0	hsa-miR-371a-5p	-0.38	-0.38	N/A	2007, 2009, 2011
RPL37	ENST00000274242.5	ribosomal protein L37	1785	Sites in UTR	5	3	2	0	1	hsa-miR-371a-5p	-0.37	-0.41	N/A
AC007390.5	ENST00000402297.1	HCG1988162; Uncharacterized protein	223	Sites in UTR	2	0	0	2	1	hsa-miR-371a-5p	-0.37	-0.37	N/A
NUP62CL	ENST00000372461.3	nucleoporin 62kDa C-terminal like	73	Sites in UTR	3	1	0	2	1	hsa-miR-371a-5p	-0.36	-0.39	N/A
RHPN2	ENST00000254260.3	rhophilin, Rho GTPase binding protein 2	5	Sites in UTR	1	1	0	0	1	hsa-miR-371a-5p	-0.35	-0.35	N/A
PCDHB7	ENST00000231137.3	protocadherin beta 7	19	Sites in UTR	1	1	0	0	0	hsa-miR-371a-5p	-0.34	-0.34	N/A
CLEC6A	ENST00000382073.3	C-type lectin domain family 6, member A	5	Sites in UTR	1	1	0	0	0	hsa-miR-371a-5p	-0.34	-0.34	N/A
RFK	ENST00000376736.1	riboflavin kinase	797	Sites in UTR	2	1	0	1	0	hsa-miR-371a-5p	-0.34	-0.35	N/A
RP11-248J23.6	ENST00000472454.2	Protein LOC100652732	5	Sites in UTR	1	1	0	0	0	hsa-miR-371a-5p	-0.34	-0.34	N/A
PAGE4	ENST00000376141.1	P antigen family, member 4 (prostate associated)	11	Sites in UTR	1	0	1	0	0	hsa-miR-371a-5p	-0.34	-0.34	N/A
GTF2IRD2B	ENST00000356115.5	GTF2I repeat domain containing 2B	5	Sites in UTR	1	1	0	0	0	hsa-miR-371a-5p	-0.34	-0.34	N/A
ENOPH1	ENST00000273920.3	enolase-phosphatase 1	615	Sites in UTR	1	0	0	1	0	hsa-miR-371a-5p	-0.34	-0.34	N/A
LYRM4	ENST00000330636.4	LYR motif containing 4	796	Sites in UTR	5	1	1	3	1	hsa-miR-371a-5p	-0.34	-0.45	N/A
PSMC6	ENST00000445930.2	proteasome (prosome, macropain) 26S subunit, ATPase, 6	72	Sites in UTR	0	0	0	0	0	hsa-miR-371a-5p	-0.33	-0.33	N/A
C3orf83	ENST00000564146.3	chromosome 3 open reading frame 83	5	Sites in UTR	1	1	0	0	0	hsa-miR-371a-5p	-0.33	-0.33	N/A
ZNF16	ENST00000276816.4	zinc finger protein 16	144	Sites in UTR	1	1	0	0	0	hsa-miR-371a-5p	-0.33	-0.33	N/A
C1D	ENST00000355848.3	C1D nuclear receptor corepressor	12	Sites in UTR	1	0	1	0	2	hsa-miR-371a-5p	-0.33	-0.45	N/A
SLC28A1	ENST00000338602.2	solute carrier family 28 (concentrative nucleoside transporter), member 1	5	Sites in UTR	2	2	0	0	1	hsa-miR-371a-5p	-0.33	-0.36	N/A
CYP3A5	ENST00000339843.2	cytochrome P450, family 3, subfamily A, polypeptide 5	5	Sites in UTR	1	1	0	0	1	hsa-miR-371a-5p	-0.33	-0.33	N/A
RBPMS	ENST00000320203.4	RNA binding protein with multiple splicing	472	Sites in UTR	2	1	1	0	0	hsa-miR-371a-5p	-0.33	-0.33	N/A	2011
SPANXN2	ENST00000370498.1	SPANX family, member N2	5	Sites in UTR	1	0	1	0	0	hsa-miR-371a-5p	-0.32	-0.32	N/A
TMEM185B	ENST00000426077.2	transmembrane protein 185B	1146	Sites in UTR	2	1	0	1	1	hsa-miR-371a-5p	-0.32	-0.38	N/A
OSTF1	ENST00000346234.6	osteoclast stimulating factor 1	107	Sites in UTR	4	1	1	2	1	hsa-miR-371a-5p	-0.32	-0.37	N/A
CPA1	ENST00000484324.1	carboxypeptidase A1 (pancreatic)	109	Sites in UTR	1	0	1	0	0	hsa-miR-371a-5p	-0.32	-0.32	N/A
CKS2	ENST00000314355.6	CDC28 protein kinase regulatory subunit 2	1187	Sites in UTR	1	0	1	0	1	hsa-miR-371a-5p	-0.31	-0.37	N/A
GCSAML	ENST00000366488.4	germinal center-associated, signaling and motility-like	5	Sites in UTR	4	1	2	1	2	hsa-miR-371a-5p	-0.31	-0.31	N/A
FAM19A1	ENST00000478136.1	family with sequence similarity 19 (chemokine (C-C motif)-like), member A1	5	Sites in UTR	4	1	0	3	2	hsa-miR-371a-5p	-0.31	-0.32	N/A
SDHD	ENST00000526592.1	succinate dehydrogenase complex, subunit D, integral membrane protein	62	Sites in UTR	1	1	0	0	1	hsa-miR-371a-5p	-0.31	-0.31	N/A
ZNF24	ENST00000589881.1	zinc finger protein 24	1796	Sites in UTR	3	1	0	2	0	hsa-miR-371a-5p	-0.31	-0.31	N/A
SYCP2L	ENST00000283141.6	synaptonemal complex protein 2-like	140	Sites in UTR	2	1	0	1	1	hsa-miR-371a-5p	-0.31	-0.39	N/A
SRSF2	ENST00000392485.2	serine/arginine-rich splicing factor 2	9241	Sites in UTR	1	1	0	0	2	hsa-miR-371a-5p	-0.3	-0.3	N/A	2007
NEUROD1	ENST00000295108.3	neuronal differentiation 1	5	Sites in UTR	0	0	0	0	1	hsa-miR-371a-5p	-0.3	-0.3	N/A	2009, 2011
DCAF12	ENST00000361264.4	DDB1 and CUL4 associated factor 12	2075	Sites in UTR	0	0	0	0	1	hsa-miR-371a-5p	-0.3	-0.3	N/A	2011
DEFB129	ENST00000246105.4	defensin, beta 129	5	Sites in UTR	1	0	1	0	0	hsa-miR-371a-5p	-0.3	-0.3	N/A
WBSCR22	ENST00000265758.2	Williams Beuren syndrome chromosome region 22	1843	Sites in UTR	1	1	0	0	1	hsa-miR-371a-5p	-0.3	-0.3	N/A
CCBL2	ENST00000370485.2	cysteine conjugate-beta lyase 2	409	Sites in UTR	0	0	0	0	0	hsa-miR-371a-5p	-0.3	-0.3	N/A
SMIM21	ENST00000579022.1	small integral membrane protein 21	5	Sites in UTR	0	0	0	0	0	hsa-miR-371a-5p	-0.3	-0.3	N/A	2007, 2009, 2011
VPS35	ENST00000299138.7	vacuolar protein sorting 35 homolog (S. cerevisiae)	1801	Sites in UTR	4	2	1	1	1	hsa-miR-371a-5p	-0.29	-0.38	N/A	2009, 2011
TAF11	ENST00000420584.2	TAF11 RNA polymerase II, TATA box binding protein (TBP)-associated factor, 28kDa	18	Sites in UTR	1	1	0	0	1	hsa-miR-371a-5p	-0.29	-0.29	N/A
CCDC126	ENST00000307471.3	coiled-coil domain containing 126	846	Sites in UTR	1	1	0	0	1	hsa-miR-371a-5p	-0.29	-0.29	N/A
CKS1B	ENST00000308987.5	CDC28 protein kinase regulatory subunit 1B	186	Sites in UTR	2	1	0	1	0	hsa-miR-371a-5p	-0.29	-0.29	N/A
C7orf13	ENST00000333319.6	chromosome 7 open reading frame 13	14	Sites in UTR	1	1	0	0	1	hsa-miR-371a-5p	-0.29	-0.29	N/A
AL049747.1	ENST00000594060.1		5	Sites in UTR	1	1	0	0	0	hsa-miR-371a-5p	-0.29	-0.29	N/A
ZNF714	ENST00000596053.1	zinc finger protein 714	61	Sites in UTR	2	0	0	2	2	hsa-miR-371a-5p	-0.29	-0.35	N/A
XG	ENST00000426774.1	Xg blood group	5	Sites in UTR	3	0	1	2	1	hsa-miR-371a-5p	-0.28	-0.28	N/A
TMEM14A	ENST00000211314.4	transmembrane protein 14A	469	Sites in UTR	1	0	1	0	0	hsa-miR-371a-5p	-0.28	-0.28	N/A
CCNY	ENST00000374706.1	cyclin Y	672	Sites in UTR	1	0	0	1	0	hsa-miR-371a-5p	-0.28	-0.29	N/A	2011
C6orf141	ENST00000529246.2	chromosome 6 open reading frame 141	28	Sites in UTR	7	1	2	4	0	hsa-miR-371a-5p	-0.28	-0.56	N/A
HSPA2	ENST00000394709.1	heat shock 70kDa protein 2	600	Sites in UTR	3	0	0	3	1	hsa-miR-371a-5p	-0.28	-0.31	N/A	2011
TBCA	ENST00000306388.6	tubulin folding cofactor A	3605	Sites in UTR	3	1	1	1	1	hsa-miR-371a-5p	-0.28	-0.28	N/A
ALG13	ENST00000371979.3	ALG13, UDP-N-acetylglucosaminyltransferase subunit	612	Sites in UTR	2	1	0	1	0	hsa-miR-371a-5p	-0.28	-0.31	N/A
CLPTM1L	ENST00000320895.5	CLPTM1-like	14627	Sites in UTR	1	1	0	0	1	hsa-miR-371a-5p	-0.28	-0.29	N/A
MGARP	ENST00000398955.1	mitochondria-localized glutamic acid-rich protein	184	Sites in UTR	1	0	1	0	0	hsa-miR-371a-5p	-0.28	-0.31	N/A
SF3B5	ENST00000367569.2	splicing factor 3b, subunit 5, 10kDa	16144	Sites in UTR	1	1	0	0	1	hsa-miR-371a-5p	-0.27	-0.28	N/A
PARG	ENST00000402038.3	poly (ADP-ribose) glycohydrolase	445	Sites in UTR	2	1	1	0	2	hsa-miR-371a-5p	-0.27	-0.28	N/A
CER1	ENST00000380911.3	cerberus 1, DAN family BMP antagonist	5	Sites in UTR	1	1	0	0	0	hsa-miR-371a-5p	-0.27	-0.27	N/A
CYP4F31P	ENST00000416266.1	cytochrome P450, family 4, subfamily F, polypeptide 31, pseudogene	5	Sites in UTR	1	1	0	0	0	hsa-miR-371a-5p	-0.27	-0.27	N/A
NDE1	ENST00000396353.2	nudE neurodevelopment protein 1	25	Sites in UTR	2	0	0	2	0	hsa-miR-371a-5p	-0.27	-0.27	N/A
LY6G5B	ENST00000375864.4	lymphocyte antigen 6 complex, locus G5B	200	Sites in UTR	2	2	0	0	0	hsa-miR-371a-5p	-0.27	-0.27	N/A
LRRC42	ENST00000371370.3	leucine rich repeat containing 42	95	Sites in UTR	1	0	1	0	0	hsa-miR-371a-5p	-0.27	-0.27	N/A
ZBTB37	ENST00000367701.5	zinc finger and BTB domain containing 37	213	Sites in UTR	10	3	2	5	1	hsa-miR-371a-5p	-0.27	-0.3	N/A
BNIP3L	ENST00000380629.2	BCL2/adenovirus E1B 19kDa interacting protein 3-like	191	Sites in UTR	2	0	1	1	0	hsa-miR-371a-5p	-0.27	-0.28	N/A
PTGR1	ENST00000309195.5	prostaglandin reductase 1	11327	Sites in UTR	1	0	1	0	0	hsa-miR-371a-5p	-0.26	-0.27	N/A
FAM86B1	ENST00000448228.2	family with sequence similarity 86, member B1	5	Sites in UTR	1	1	0	0	0	hsa-miR-371a-5p	-0.26	-0.26	N/A	2007
C2orf43	ENST00000440866.2	chromosome 2 open reading frame 43	398	Sites in UTR	2	1	1	0	1	hsa-miR-371a-5p	-0.26	-0.32

## Sheet: miRDB_Results
Table S6: miRNA target predictor software results for MIR-371-5p - miRDB
Target Detail	Target Rank	Target Score	miRNA Name	Gene Symbol	Gene Description
Details	1	99	hsa-miR-371a-5p	CCDC23	coiled-coil domain containing 23
Details	2	97	hsa-miR-371a-5p	MSL2	male-specific lethal 2 homolog (Drosophila)
Details	3	97	hsa-miR-371a-5p	C2orf49	chromosome 2 open reading frame 49
Details	4	96	hsa-miR-371a-5p	BTG3	BTG family, member 3
Details	5	95	hsa-miR-371a-5p	SRRM1	serine/arginine repetitive matrix 1
Details	6	95	hsa-miR-371a-5p	KDM6A	lysine (K)-specific demethylase 6A
Details	7	94	hsa-miR-371a-5p	RPS6KA2	ribosomal protein S6 kinase, 90kDa, polypeptide 2
Details	8	94	hsa-miR-371a-5p	BECN1	beclin 1, autophagy related
Details	9	94	hsa-miR-371a-5p	RHPN2	rhophilin, Rho GTPase binding protein 2
Details	10	94	hsa-miR-371a-5p	PARG	poly (ADP-ribose) glycohydrolase
Details	11	94	hsa-miR-371a-5p	BARD1	BRCA1 associated RING domain 1
Details	12	93	hsa-miR-371a-5p	MAPRE1	microtubule-associated protein, RP/EB family, member 1
Details	13	93	hsa-miR-371a-5p	SEC24A	SEC24 family member A
Details	14	93	hsa-miR-371a-5p	GMFB	glia maturation factor, beta
Details	15	93	hsa-miR-371a-5p	ZNF644	zinc finger protein 644
Details	16	93	hsa-miR-371a-5p	HSPA13	heat shock protein 70kDa family, member 13
Details	17	93	hsa-miR-371a-5p	FGFR1OP2	FGFR1 oncogene partner 2
Details	18	92	hsa-miR-371a-5p	PCDH8	protocadherin 8
Details	19	92	hsa-miR-371a-5p	ZMYM5	zinc finger, MYM-type 5
Details	20	92	hsa-miR-371a-5p	PCMTD1	protein-L-isoaspartate (D-aspartate) O-methyltransferase domain containing 1
Details	21	91	hsa-miR-371a-5p	SLC35E2B	solute carrier family 35, member E2B
Details	22	91	hsa-miR-371a-5p	COA3	cytochrome c oxidase assembly factor 3
Details	23	90	hsa-miR-371a-5p	USP32	ubiquitin specific peptidase 32
Details	24	90	hsa-miR-371a-5p	TRIM36	tripartite motif containing 36
Details	25	89	hsa-miR-371a-5p	ANO6	anoctamin 6
Details	26	89	hsa-miR-371a-5p	KIAA2022	KIAA2022
Details	27	88	hsa-miR-371a-5p	AKAP13	A kinase (PRKA) anchor protein 13
Details	28	88	hsa-miR-371a-5p	CSMD1	CUB and Sushi multiple domains 1
Details	29	88	hsa-miR-371a-5p	RHOU	ras homolog family member U
Details	30	88	hsa-miR-371a-5p	SRSF3	serine/arginine-rich splicing factor 3
Details	31	88	hsa-miR-371a-5p	SYCP2L	synaptonemal complex protein 2-like
Details	32	88	hsa-miR-371a-5p	SCN9A	sodium channel, voltage-gated, type IX, alpha subunit
Details	33	86	hsa-miR-371a-5p	PLCB1	phospholipase C, beta 1 (phosphoinositide-specific)
Details	34	86	hsa-miR-371a-5p	TFPI	tissue factor pathway inhibitor (lipoprotein-associated coagulation inhibitor)
Details	35	86	hsa-miR-371a-5p	HELZ	helicase with zinc finger
Details	36	85	hsa-miR-371a-5p	ETV1	ets variant 1
Details	37	85	hsa-miR-371a-5p	RSF1	remodeling and spacing factor 1
Details	38	85	hsa-miR-371a-5p	MYCN	v-myc avian myelocytomatosis viral oncogene neuroblastoma derived homolog
Details	39	85	hsa-miR-371a-5p	GTF2H3	general transcription factor IIH, polypeptide 3, 34kDa
Details	40	84	hsa-miR-371a-5p	MAP3K1	mitogen-activated protein kinase kinase kinase 1, E3 ubiquitin protein ligase
Details	41	84	hsa-miR-371a-5p	MLLT4	myeloid/lymphoid or mixed-lineage leukemia (trithorax homolog, Drosophila); translocated to, 4
Details	42	84	hsa-miR-371a-5p	RASAL2	RAS protein activator like 2
Details	43	83	hsa-miR-371a-5p	AFF4	AF4/FMR2 family, member 4
Details	44	82	hsa-miR-371a-5p	RFK	riboflavin kinase
Details	45	82	hsa-miR-371a-5p	WBP11	WW domain binding protein 11
Details	46	82	hsa-miR-371a-5p	NGRN	neugrin, neurite outgrowth associated
Details	47	81	hsa-miR-371a-5p	SIAH2	siah E3 ubiquitin protein ligase 2
Details	48	81	hsa-miR-371a-5p	MS4A12	membrane-spanning 4-domains, subfamily A, member 12
Details	49	81	hsa-miR-371a-5p	CXorf23	chromosome X open reading frame 23
Details	50	81	hsa-miR-371a-5p	PPTC7	PTC7 protein phosphatase homolog (S. cerevisiae)
Details	51	81	hsa-miR-371a-5p	NRIP1	nuclear receptor interacting protein 1
Details	52	81	hsa-miR-371a-5p	GHITM	growth hormone inducible transmembrane protein
Details	53	81	hsa-miR-371a-5p	IKZF2	IKAROS family zinc finger 2 (Helios)
Details	54	81	hsa-miR-371a-5p	MED9	mediator complex subunit 9
Details	55	80	hsa-miR-371a-5p	CELF1	CUGBP, Elav-like family member 1
Details	56	80	hsa-miR-371a-5p	LRRC20	leucine rich repeat containing 20
Details	57	80	hsa-miR-371a-5p	ZBTB34	zinc finger and BTB domain containing 34
Details	58	80	hsa-miR-371a-5p	SAR1B	secretion associated, Ras related GTPase 1B
Details	59	80	hsa-miR-371a-5p	ZNF706	zinc finger protein 706
Details	60	80	hsa-miR-371a-5p	RER1	retention in endoplasmic reticulum sorting receptor 1
Details	61	79	hsa-miR-371a-5p	CERK	ceramide kinase
Details	62	79	hsa-miR-371a-5p	DGKB	diacylglycerol kinase, beta 90kDa
Details	63	78	hsa-miR-371a-5p	SMEK1	SMEK homolog 1, suppressor of mek1 (Dictyostelium)
Details	64	78	hsa-miR-371a-5p	ZFHX3	zinc finger homeobox 3
Details	65	78	hsa-miR-371a-5p	ITGB8	integrin, beta 8
Details	66	77	hsa-miR-371a-5p	UBXN2B	UBX domain protein 2B
Details	67	77	hsa-miR-371a-5p	TRIM59	tripartite motif containing 59
Details	68	77	hsa-miR-371a-5p	SUZ12	SUZ12 polycomb repressive complex 2 subunit
Details	69	77	hsa-miR-371a-5p	POGK	pogo transposable element with KRAB domain
Details	70	77	hsa-miR-371a-5p	KIAA0232	KIAA0232
Details	71	77	hsa-miR-371a-5p	MFSD4	major facilitator superfamily domain containing 4
Details	72	77	hsa-miR-371a-5p	EPS15	epidermal growth factor receptor pathway substrate 15
Details	73	77	hsa-miR-371a-5p	FAM129A	family with sequence similarity 129, member A
Details	74	76	hsa-miR-371a-5p	ZNF385B	zinc finger protein 385B
Details	75	76	hsa-miR-371a-5p	POT1	protection of telomeres 1
Details	76	76	hsa-miR-371a-5p	EML4	echinoderm microtubule associated protein like 4
Details	77	76	hsa-miR-371a-5p	BTF3L4	basic transcription factor 3-like 4
Details	78	76	hsa-miR-371a-5p	PDGFD	platelet derived growth factor D
Details	79	76	hsa-miR-371a-5p	CLPTM1L	CLPTM1-like
Details	80	75	hsa-miR-371a-5p	CHIC1	cysteine-rich hydrophobic domain 1
Details	81	75	hsa-miR-371a-5p	SOX2	SRY (sex determining region Y)-box 2
Details	82	75	hsa-miR-371a-5p	NFAT5	nuclear factor of activated T-cells 5, tonicity-responsive
Details	83	75	hsa-miR-371a-5p	CST9L	cystatin 9-like
Details	84	75	hsa-miR-371a-5p	MET	met proto-oncogene
Details	85	75	hsa-miR-371a-5p	SCRN1	secernin 1
Details	86	75	hsa-miR-371a-5p	KDELC2	KDEL (Lys-Asp-Glu-Leu) containing 2
Details	87	74	hsa-miR-371a-5p	MACROD2	MACRO domain containing 2
Details	88	74	hsa-miR-371a-5p	CDK13	cyclin-dependent kinase 13
Details	89	74	hsa-miR-371a-5p	TET2	tet methylcytosine dioxygenase 2
Details	90	74	hsa-miR-371a-5p	CDC73	cell division cycle 73
Details	91	74	hsa-miR-371a-5p	CYBRD1	cytochrome b reductase 1
Details	92	73	hsa-miR-371a-5p	ENOPH1	enolase-phosphatase 1
Details	93	73	hsa-miR-371a-5p	PCDH17	protocadherin 17
Details	94	73	hsa-miR-371a-5p	R3HDM2	R3H domain containing 2
Details	95	73	hsa-miR-371a-5p	LYRM4	LYR motif containing 4
Details	96	72	hsa-miR-371a-5p	KIAA1841	KIAA1841
Details	97	72	hsa-miR-371a-5p	GCFC2	GC-rich sequence DNA-binding factor 2
Details	98	72	hsa-miR-371a-5p	TWISTNB	TWIST neighbor
Details	99	72	hsa-miR-371a-5p	LMAN1	lectin, mannose-binding, 1
Details	100	72	hsa-miR-371a-5p	FNBP1L	formin binding protein 1-like
Details	101	71	hsa-miR-371a-5p	ANKS1B	ankyrin repeat and sterile alpha motif domain containing 1B
Details	102	71	hsa-miR-371a-5p	SLC35E2	solute carrier family 35, member E2
Details	103	71	hsa-miR-371a-5p	MLEC	malectin
Details	104	71	hsa-miR-371a-5p	NAV3	neuron navigator 3
Details	105	70	hsa-miR-371a-5p	TRRAP	transformation/transcription domain-associated protein
Details	106	70	hsa-miR-371a-5p	LRP6	low density lipoprotein receptor-related protein 6
Details	107	70	hsa-miR-371a-5p	GPD2	glycerol-3-phosphate dehydrogenase 2 (mitochondrial)
Details	108	70	hsa-miR-371a-5p	ATP1A2	ATPase, Na+/K+ transporting, alpha 2 polypeptide
Details	109	70	hsa-miR-371a-5p	REXO1	REX1, RNA exonuclease 1 homolog (S. cerevisiae)
Details	110	70	hsa-miR-371a-5p	DHRS11	dehydrogenase/reductase (SDR family) member 11
Details	111	70	hsa-miR-371a-5p	SCN7A	sodium channel, voltage-gated, type VII, alpha subunit
Details	112	70	hsa-miR-371a-5p	SCN2A	sodium channel, voltage-gated, type II, alpha subunit
Details	113	70	hsa-miR-371a-5p	PKNOX1	PBX/knotted 1 homeobox 1
Details	114	69	hsa-miR-371a-5p	ZFYVE26	zinc finger, FYVE domain containing 26
Details	115	69	hsa-miR-371a-5p	BUB3	BUB3 mitotic checkpoint protein
Details	116	69	hsa-miR-371a-5p	ZKSCAN8	zinc finger with KRAB and SCAN domains 8
Details	117	69	hsa-miR-371a-5p	CCDC85A	coiled-coil domain containing 85A
Details	118	69	hsa-miR-371a-5p	TBX18	T-box 18
Details	119	69	hsa-miR-371a-5p	SOCS5	suppressor of cytokine signaling 5
Details	120	68	hsa-miR-371a-5p	ERCC4	excision repair cross-complementation group 4
Details	121	68	hsa-miR-371a-5p	HCFC2	host cell factor C2
Details	122	68	hsa-miR-371a-5p	SRPK2	SRSF protein kinase 2
Details	123	68	hsa-miR-371a-5p	RPS6KA6	ribosomal protein S6 kinase, 90kDa, polypeptide 6
Details	124	68	hsa-miR-371a-5p	OCLN	occludin
Details	125	68	hsa-miR-371a-5p	EEF2K	eukaryotic elongation factor-2 kinase
Details	126	68	hsa-miR-371a-5p	MYCBP2	MYC binding protein 2, E3 ubiquitin protein ligase
Details	127	68	hsa-miR-371a-5p	UTY	ubiquitously transcribed tetratricopeptide repeat containing, Y-linked
Details	128	68	hsa-miR-371a-5p	SH3BGRL2	SH3 domain binding glutamate-rich protein like 2
Details	129	67	hsa-miR-371a-5p	LMLN	leishmanolysin-like (metallopeptidase M8 family)
Details	130	67	hsa-miR-371a-5p	GRIA2	glutamate receptor, ionotropic, AMPA 2
Details	131	67	hsa-miR-371a-5p	FMO3	flavin containing monooxygenase 3
Details	132	67	hsa-miR-371a-5p	MPL	myeloproliferative leukemia virus oncogene
Details	133	67	hsa-miR-371a-5p	RNF146	ring finger protein 146
Details	134	67	hsa-miR-371a-5p	BEND2	BEN domain containing 2
Details	135	67	hsa-miR-371a-5p	MAP3K5	mitogen-activated protein kinase kinase kinase 5
Details	136	67	hsa-miR-371a-5p	SS18	synovial sarcoma translocation, chromosome 18
Details	137	67	hsa-miR-371a-5p	UBE2O	ubiquitin-conjugating enzyme E2O
Details	138	67	hsa-miR-371a-5p	FZD4	frizzled class receptor 4
Details	139	67	hsa-miR-371a-5p	NKAIN2	Na+/K+ transporting ATPase interacting 2
Details	140	67	hsa-miR-371a-5p	GLRX2	glutaredoxin 2
Details	141	66	hsa-miR-371a-5p	MSL3	male-specific lethal 3 homolog (Drosophila)
Details	142	66	hsa-miR-371a-5p	APBB2	amyloid beta (A4) precursor protein-binding, family B, member 2
Details	143	66	hsa-miR-371a-5p	SORL1	sortilin-related receptor, L(DLR class) A repeats containing
Details	144	66	hsa-miR-371a-5p	TMEM50B	transmembrane protein 50B
Details	145	66	hsa-miR-371a-5p	ARFGEF2	ADP-ribosylation factor guanine nucleotide-exchange factor 2 (brefeldin A-inhibited)
Details	146	66	hsa-miR-371a-5p	WAPAL	wings apart-like homolog (Drosophila)
Details	147	65	hsa-miR-371a-5p	NR4A2	nuclear receptor subfamily 4, group A, member 2
Details	148	65	hsa-miR-371a-5p	UBE2B	ubiquitin-conjugating enzyme E2B
Details	149	65	hsa-miR-371a-5p	CCDC126	coiled-coil domain containing 126
Details	150	65	hsa-miR-371a-5p	VPS26A	vacuolar protein sorting 26 homolog A (S. pombe)
Details	151	65	hsa-miR-371a-5p	USP33	ubiquitin specific peptidase 33
Details	152	65	hsa-miR-371a-5p	PLEKHB2	pleckstrin homology domain containing, family B (evectins) member 2
Details	153	64	hsa-miR-371a-5p	FAM126B	family with sequence similarity 126, member B
Details	154	64	hsa-miR-371a-5p	OSER1	oxidative stress responsive serine-rich 1
Details	155	64	hsa-miR-371a-5p	BOLL	boule-like RNA-binding protein
Details	156	64	hsa-miR-371a-5p	FAM110C	family with sequence similarity 110, member C
Details	157	64	hsa-miR-371a-5p	KIF5B	kinesin family member 5B
Details	158	63	hsa-miR-371a-5p	PRPF4B	pre-mRNA processing factor 4B
Details	159	63	hsa-miR-371a-5p	KIDINS220	kinase D-interacting substrate, 220kDa
Details	160	63	hsa-miR-371a-5p	HMGB2	high mobility group box 2
Details	161	62	hsa-miR-371a-5p	CEP83	centrosomal protein 83kDa
Details	162	62	hsa-miR-371a-5p	METTL17	methyltransferase like 17
Details	163	62	hsa-miR-371a-5p	SLC9A6	solute carrier family 9, subfamily A (NHE6, cation proton antiporter 6), member 6
Details	164	62	hsa-miR-371a-5p	FOXD2	forkhead box D2
Details	165	62	hsa-miR-371a-5p	ZKSCAN1	zinc finger with KRAB and SCAN domains 1
Details	166	62	hsa-miR-371a-5p	CPPED1	calcineurin-like phosphoesterase domain containing 1
Details	167	62	hsa-miR-371a-5p	DPYSL5	dihydropyrimidinase-like 5
Details	168	62	hsa-miR-371a-5p	ZC3H12D	zinc finger CCCH-type containing 12D
Details	169	62	hsa-miR-371a-5p	NETO1	neuropilin (NRP) and tolloid (TLL)-like 1
Details	170	62	hsa-miR-371a-5p	TBCEL	tubulin folding cofactor E-like
Details	171	62	hsa-miR-371a-5p	SLC16A1	solute carrier family 16 (monocarboxylate transporter), member 1
Details	172	61	hsa-miR-371a-5p	CCDC121	coiled-coil domain containing 121
Details	173	61	hsa-miR-371a-5p	MYSM1	Myb-like, SWIRM and MPN domains 1
Details	174	61	hsa-miR-371a-5p	FOXK1	forkhead box K1
Details	175	61	hsa-miR-371a-5p	FAM122B	family with sequence similarity 122B
Details	176	60	hsa-miR-371a-5p	OTUD7B	OTU deubiquitinase 7B
Details	177	60	hsa-miR-371a-5p	PPHLN1	periphilin 1
Details	178	60	hsa-miR-371a-5p	ATG2B	autophagy related 2B
Details	179	60	hsa-miR-371a-5p	RNF170	ring finger protein 170
Details	180	60	hsa-miR-371a-5p	NUP50	nucleoporin 50kDa
Details	181	60	hsa-miR-371a-5p	KCNJ15	potassium inwardly-rectifying channel, subfamily J, member 15
Details	182	60	hsa-miR-371a-5p	ZC3H6	zinc finger CCCH-type containing 6
Details	183	59	hsa-miR-371a-5p	ACBD3	acyl-CoA binding domain containing 3
Details	184	59	hsa-miR-371a-5p	ACVR1B	activin A receptor, type IB
Details	185	59	hsa-miR-371a-5p	ZNRF1	zinc and ring finger 1, E3 ubiquitin protein ligase
Details	186	59	hsa-miR-371a-5p	GJD4	gap junction protein, delta 4, 40.1kDa
Details	187	59	hsa-miR-371a-5p	NME5	NME/NM23 family member 5
Details	188	59	hsa-miR-371a-5p	SMAP1	small ArfGAP 1
Details	189	59	hsa-miR-371a-5p	VPS35	vacuolar protein sorting 35 homolog (S. cerevisiae)
Details	190	59	hsa-miR-371a-5p	BTBD1	BTB (POZ) domain containing 1
Details	191	59	hsa-miR-371a-5p	ZNF503	zinc finger protein 503
Details	192	59	hsa-miR-371a-5p	DEFB129	defensin, beta 129
Details	193	59	hsa-miR-371a-5p	PSMG3	proteasome (prosome, macropain) assembly chaperone 3
Details	194	58	hsa-miR-371a-5p	DIRAS3	DIRAS family, GTP-binding RAS-like 3
Details	195	58	hsa-miR-371a-5p	SOX21	SRY (sex determining region Y)-box 21
Details	196	58	hsa-miR-371a-5p	TTC33	tetratricopeptide repeat domain 33
Details	197	58	hsa-miR-371a-5p	QSER1	glutamine and serine rich 1
Details	198	58	hsa-miR-371a-5p	EPM2AIP1	EPM2A (laforin) interacting protein 1
Details	199	58	hsa-miR-371a-5p	KNOP1	lysine-rich nucleolar protein 1
Details	200	58	hsa-miR-371a-5p	UBE2G1	ubiquitin-conjugating enzyme E2G 1
Details	201	58	hsa-miR-371a-5p	RPL37	ribosomal protein L37
Details	202	58	hsa-miR-371a-5p	COL9A1	collagen, type IX, alpha 1
Details	203	58	hsa-miR-371a-5p	CAMK2G	calcium/calmodulin-dependent protein kinase II gamma
Details	204	57	hsa-miR-371a-5p	TRIB2	tribbles pseudokinase 2
Details	205	57	hsa-miR-371a-5p	RABIF	RAB interacting factor
Details	206	57	hsa-miR-371a-5p	PSMD12	proteasome (prosome, macropain) 26S subunit, non-ATPase, 12
Details	207	56	hsa-miR-371a-5p	MUC21	mucin 21, cell surface associated
Details	208	56	hsa-miR-371a-5p	GPC6	glypican 6
Details	209	56	hsa-miR-371a-5p	FBXO38	F-box protein 38
Details	210	56	hsa-miR-371a-5p	SNX18	sorting nexin 18
Details	211	56	hsa-miR-371a-5p	RNF141	ring finger protein 141
Details	212	56	hsa-miR-371a-5p	FAM210A	family with sequence similarity 210, member A
Details	213	56	hsa-miR-371a-5p	PAPOLA	poly(A) polymerase alpha
Details	214	56	hsa-miR-371a-5p	SLC35F2	solute carrier family 35, member F2
Details	215	55	hsa-miR-371a-5p	CPEB4	cytoplasmic polyadenylation element binding protein 4
Details	216	55	hsa-miR-371a-5p	GSR	glutathione reductase
Details	217	55	hsa-miR-371a-5p	ITSN1	intersectin 1 (SH3 domain protein)
Details	218	55	hsa-miR-371a-5p	PSD3	pleckstrin and Sec7 domain containing 3
Details	219	55	hsa-miR-371a-5p	RLIM	ring finger protein, LIM domain interacting
Details	220	54	hsa-miR-371a-5p	TMEM106B	transmembrane protein 106B
Details	221	54	hsa-miR-371a-5p	PAFAH1B2	platelet-activating factor acetylhydrolase 1b, catalytic subunit 2 (30kDa)
Details	222	54	hsa-miR-371a-5p	ORC5	origin recognition complex, subunit 5
Details	223	54	hsa-miR-371a-5p	TC2N	tandem C2 domains, nuclear
Details	224	54	hsa-miR-371a-5p	SEL1L	sel-1 suppressor of lin-12-like (C. elegans)
Details	225	54	hsa-miR-371a-5p	SERINC5	serine incorporator 5
Details	226	53	hsa-miR-371a-5p	SLC45A4	solute carrier family 45, member 4
Details	227	53	hsa-miR-371a-5p	CARD6	caspase recruitment domain family, member 6
Details	228	53	hsa-miR-371a-5p	TTC39C	tetratricopeptide repeat domain 39C
Details	229	53	hsa-miR-371a-5p	ZNHIT6	zinc finger, HIT-type containing 6
Details	230	53	hsa-miR-371a-5p	EVI2B	ecotropic viral integration site 2B
Details	231	53	hsa-miR-371a-5p	OTP	orthopedia homeobox
Details	232	53	hsa-miR-371a-5p	FLI1	Fli-1 proto-oncogene, ETS transcription factor
Details	233	53	hsa-miR-371a-5p	GLRA3	glycine receptor, alpha 3
Details	234	52	hsa-miR-371a-5p	ILF3	interleukin enhancer binding factor 3, 90kDa
Details	235	52	hsa-miR-371a-5p	IFIT2	interferon-induced protein with tetratricopeptide repeats 2
Details	236	52	hsa-miR-371a-5p	DCBLD2	discoidin, CUB and LCCL domain containing 2
Details	237	52	hsa-miR-371a-5p	ENDOD1	endonuclease domain containing 1
Details	238	52	hsa-miR-371a-5p	CASZ1	castor zinc finger 1
Details	239	52	hsa-miR-371a-5p	TAP2	transporter 2, ATP-binding cassette, sub-family B (MDR/TAP)
Details	240	52	hsa-miR-371a-5p	2015-09-08	septin 8
Details	241	52	hsa-miR-371a-5p	UBE2J1	ubiquitin-conjugating enzyme E2, J1
Details	242	52	hsa-miR-371a-5p	SIX4	SIX homeobox 4
Details	243	52	hsa-miR-371a-5p	CCDC50	coiled-coil domain containing 50
Details	244	52	hsa-miR-371a-5p	ZNF667	zinc finger protein 667
Details	245	51	hsa-miR-371a-5p	DIXDC1	DIX domain containing 1
Details	246	51	hsa-miR-371a-5p	EXTL3	exostosin-like glycosyltransferase 3
Details	247	51	hsa-miR-371a-5p	BAZ1A	bromodomain adjacent to zinc finger domain, 1A
Details	248	51	hsa-miR-371a-5p	DFFB	DNA fragmentation factor, 40kDa, beta polypeptide (caspase-activated DNase)
Details	249	51	hsa-miR-371a-5p	BAG5	BCL2-associated athanogene 5
Details	250	51	hsa-miR-371a-5p	TLK1	tousled-like kinase 1
Details	251	51	hsa-miR-371a-5p	KANSL2	KAT8 regulatory NSL complex subunit 2
Details	252	51	hsa-miR-371a-5p	DHFRL1	dihydrofolate reductase-like 1
Details	253	51	hsa-miR-371a-5p	SRSF2	serine/arginine-rich splicing factor 2
Details	254	51	hsa-miR-371a-5p	SSPN	sarcospan
Details	255	51	hsa-miR-371a-5p	PGAP1	post-GPI attachment to proteins 1
Details	256	51	hsa-miR-371a-5p	IFT74	intraflagellar transport 74 homolog (Chlamydomonas)
Details	257	51	hsa-miR-371a-5p	ADH6	alcohol dehydrogenase 6 (class V)
Details	258	51	hsa-miR-371a-5p	RASGRF2	Ras protein-specific guanine nucleotide-releasing factor 2
Details	259	50	hsa-miR-371a-5p	KCTD9	potassium channel tetramerization domain containing 9
Details	260	50	hsa-miR-371a-5p	NEK3	NIMA-related kinase 3
Details	261	50	hsa-miR-371a-5p	PRDM10	PR domain containing 10
Details	262	50	hsa-miR-371a-5p	KCTD12	potassium channel tetramerization domain containing 12
Details	263	50	hsa-miR-371a-5p	FMO2	flavin containing monooxygenase 2 (non-functional)
Details	264	50	hsa-miR-371a-5p	ZNF346	zinc finger protein 346

## Sheet: PITA_Results
Table S6: miRNA target predictor software results for MIR-371-5p - PITA
Organism	RefSeq	Gene Name	microRNA	Sites	Score
Human	NM_024584	FLJ13646	hsa-miR-371-5p	1	-23.54
Human	NM_006282	STK4	hsa-miR-371-5p	1	-23.34
Human	NM_032125	C1orf160	hsa-miR-371-5p	1	-19.73
Human	NM_000747	CHRNB1	hsa-miR-371-5p	2	-19
Human	NM_182612	PDDC1	hsa-miR-371-5p	1	-18.67
Human	NM_018655	LENEP	hsa-miR-371-5p	1	-17.71
Human	NM_018700	TRIM36	hsa-miR-371-5p	1	-17.64
Human	NM_001042603;NM_005056	JARID1A	hsa-miR-371-5p	2	-17.34
Human	NM_020456	C13orf1	hsa-miR-371-5p	1	-17.22
Human	NM_006139	CD28	hsa-miR-371-5p	1	-16.95
Human	NM_031423;NM_145697	NUF2	hsa-miR-371-5p	1	-16.94
Human	NM_001250	CD40	hsa-miR-371-5p	1	-16.9
Human	NM_152854	CD40	hsa-miR-371-5p	1	-16.9
Human	NM_001008756;NM_152785	GCET2	hsa-miR-371-5p	1	-16.89
Human	NM_030963	RNF146	hsa-miR-371-5p	1	-16.58
Human	NM_207426	FLJ46831	hsa-miR-371-5p	1	-16.47
Human	NM_152742	GPC2	hsa-miR-371-5p	1	-16.39
Human	NM_031485	GRWD1	hsa-miR-371-5p	1	-16.37
Human	NM_198581	ZC3H6	hsa-miR-371-5p	4	-16.33
Human	NM_002310	LIFR	hsa-miR-371-5p	1	-16.28
Human	NM_020911	PLXNA4	hsa-miR-371-5p	1	-16.18
Human	NM_020125	SLAMF8	hsa-miR-371-5p	1	-15.81
Human	NM_203395	C6orf71	hsa-miR-371-5p	1	-15.81
Human	NM_181670	ANKS1B	hsa-miR-371-5p	1	-15.79
Human	NM_153244	C10orf111	hsa-miR-371-5p	1	-15.77
Human	NM_025000	C2orf37	hsa-miR-371-5p	1	-15.71
Human	NM_014953	KIAA1008	hsa-miR-371-5p	2	-15.67
Human	NM_001004342	TRIM67	hsa-miR-371-5p	1	-15.56
Human	NM_001040110;NM_005011	NRF1	hsa-miR-371-5p	2	-15.52
Human	NM_014682	ST18	hsa-miR-371-5p	1	-15.51
Human	NM_003106	SOX2	hsa-miR-371-5p	1	-15.45
Human	NM_080927	DCBLD2	hsa-miR-371-5p	3	-15.44
Human	NM_000245	MET	hsa-miR-371-5p	1	-15.39
Human	NM_021204	ENOPH1	hsa-miR-371-5p	1	-15.36
Human	NM_001079802;NM_006731	FCMD	hsa-miR-371-5p	1	-15.3
Human	NM_018205;NM_018239;NM_207119	LRRC20	hsa-miR-371-5p	2	-15.3
Human	NM_033656	BRWD1	hsa-miR-371-5p	1	-15.29
Human	NM_018133	MSL2L1	hsa-miR-371-5p	1	-15.24
Human	NM_024072	DDX54	hsa-miR-371-5p	1	-15.24
Human	NM_024303	ZSCAN5	hsa-miR-371-5p	1	-15.05
Human	NM_001029991;NM_022734	FLJ20859	hsa-miR-371-5p	1	-15.02
Human	NM_001015048;NM_001015049;NM_004873	BAG5	hsa-miR-371-5p	2	-15
Human	NM_024871	MAP6D1	hsa-miR-371-5p	1	-15
Human	NM_001080744;NM_001080745;NM_001346	DGKG	hsa-miR-371-5p	1	-14.95
Human	NM_173588	IGSF22	hsa-miR-371-5p	1	-14.84
Human	NM_153487	MDGA1	hsa-miR-371-5p	1	-14.8
Human	NM_033403	DCLK3	hsa-miR-371-5p	1	-14.76
Human	NM_002914;NM_181471	RFC2	hsa-miR-371-5p	1	-14.75
Human	NM_018509	LRRC59	hsa-miR-371-5p	1	-14.74
Human	NM_001042594;NM_015450	POT1	hsa-miR-371-5p	2	-14.68
Human	NM_001547	IFIT2	hsa-miR-371-5p	2	-14.66
Human	NM_005828	WDR68	hsa-miR-371-5p	1	-14.63
Human	NM_031953	SNX25	hsa-miR-371-5p	1	-14.63
Human	NM_199351	C1orf32	hsa-miR-371-5p	1	-14.59
Human	NM_052954	CYYR1	hsa-miR-371-5p	1	-14.51
Human	NM_025181	SLC35F5	hsa-miR-371-5p	1	-14.48
Human	NM_052966	C1orf24	hsa-miR-371-5p	3	-14.46
Human	NM_000875	IGF1R	hsa-miR-371-5p	1	-14.43
Human	NM_032169	ACAD11	hsa-miR-371-5p	2	-14.37
Human	NM_000052	ATP7A	hsa-miR-371-5p	1	-14.35
Human	NM_153610	CMYA5	hsa-miR-371-5p	1	-14.32
Human	NM_032315	BMSC-MCP	hsa-miR-371-5p	1	-14.31
Human	NM_015885	PCF11	hsa-miR-371-5p	1	-14.29
Human	NM_018638	ETNK1	hsa-miR-371-5p	1	-14.26
Human	NM_001042539;NM_002383	MAZ	hsa-miR-371-5p	1	-14.04
Human	NM_000379	XDH	hsa-miR-371-5p	1	-14.03
Human	NM_080764	SUHW2	hsa-miR-371-5p	1	-13.99
Human	NM_006620	HBS1L	hsa-miR-371-5p	3	-13.97
Human	NM_198715	PTGER3	hsa-miR-371-5p	1	-13.88
Human	NM_001099650;NM_173601	GLT8D3	hsa-miR-371-5p	2	-13.86
Human	NM_020131	UBQLN4	hsa-miR-371-5p	1	-13.86
Human	NM_016567	BCCIP	hsa-miR-371-5p	2	-13.85
Human	NM_015551	SUSD5	hsa-miR-371-5p	1	-13.79
Human	NM_001100420;NM_001100421;NM_017447	C21orf91	hsa-miR-371-5p	1	-13.77
Human	NM_003101	SOAT1	hsa-miR-371-5p	1	-13.77
Human	NM_176815	DHFRL1	hsa-miR-371-5p	1	-13.76
Human	NM_031961	KRTAP9-2	hsa-miR-371-5p	1	-13.75
Human	NM_031963	KRTAP9-8	hsa-miR-371-5p	1	-13.75
Human	NM_004474	FOXD2	hsa-miR-371-5p	1	-13.73
Human	NM_017953	C1orf181	hsa-miR-371-5p	1	-13.7
Human	NM_002479	MYOG	hsa-miR-371-5p	1	-13.68
Human	NM_014989	RIMS1	hsa-miR-371-5p	1	-13.68
Human	NM_001013031;NM_052918	SORCS1	hsa-miR-371-5p	1	-13.67
Human	NM_003439	ZKSCAN1	hsa-miR-371-5p	1	-13.62
Human	NM_001918	DBT	hsa-miR-371-5p	3	-13.58
Human	NM_001099224	IFT74	hsa-miR-371-5p	1	-13.53
Human	NM_003724	JRK	hsa-miR-371-5p	3	-13.5
Human	NM_018246	CCDC25	hsa-miR-371-5p	1	-13.48
Human	NM_018339	RFK	hsa-miR-371-5p	1	-13.47
Human	NM_001002254	DGAT2L4	hsa-miR-371-5p	1	-13.46
Human	NM_016620;NM_032186;NM_201269	ZNF644	hsa-miR-371-5p	1	-13.45
Human	NM_020205	OTUD7B	hsa-miR-371-5p	3	-13.44
Human	NM_004331	BNIP3L	hsa-miR-371-5p	1	-13.43
Human	NM_017540;NM_198321	GALNT10	hsa-miR-371-5p	1	-13.43
Human	NM_001078166;NM_006924	SFRS1	hsa-miR-371-5p	1	-13.39
Human	NM_017542	POGK	hsa-miR-371-5p	1	-13.39
Human	NM_030579	CYB5B	hsa-miR-371-5p	1	-13.39
Human	NM_032679	ZNF577	hsa-miR-371-5p	2	-13.39
Human	NM_001004356;NM_001004358;NM_021923	FGFRL1	hsa-miR-371-5p	1	-13.37
Human	NM_031917	ANGPTL6	hsa-miR-371-5p	1	-13.36
Human	NM_004956	ETV1	hsa-miR-371-5p	1	-13.35
Human	NM_152634	MGC17403	hsa-miR-371-5p	1	-13.34
Human	NM_015474	SAMHD1	hsa-miR-371-5p	1	-13.33
Human	NM_001040445	ASB1	hsa-miR-371-5p	1	-13.32
Human	NM_031481	SLC25A18	hsa-miR-371-5p	1	-13.31
Human	NM_138959	VANGL1	hsa-miR-371-5p	1	-13.28
Human	NM_015891	CDC40	hsa-miR-371-5p	2	-13.27
Human	NM_014771	RNF40	hsa-miR-371-5p	1	-13.16
Human	NM_001868	CPA1	hsa-miR-371-5p	1	-13.13
Human	NM_020139	BDH2	hsa-miR-371-5p	1	-13.12
Human	NM_024894	NOL10	hsa-miR-371-5p	1	-13.08
Human	NM_080829	C20orf175	hsa-miR-371-5p	1	-13.07
Human	NM_005042	PRH2	hsa-miR-371-5p	1	-13.06
Human	NM_024997	ATF7IP2	hsa-miR-371-5p	1	-13.06
Human	NM_001009616	SPANXN5	hsa-miR-371-5p	1	-12.99
Human	NM_016551	TM7SF3	hsa-miR-371-5p	1	-12.88
Human	NM_032740	SFT2D3	hsa-miR-371-5p	1	-12.87
Human	NM_012325	MAPRE1	hsa-miR-371-5p	1	-12.86
Human	NM_032333	C10orf58	hsa-miR-371-5p	1	-12.86
Human	NM_018466	ALG13	hsa-miR-371-5p	1	-12.85
Human	NM_015659	RSL1D1	hsa-miR-371-5p	2	-12.84
Human	NM_024560	FLJ21963	hsa-miR-371-5p	1	-12.81
Human	NM_001009615	SPANX-N2	hsa-miR-371-5p	1	-12.8
Human	NM_003574;NM_194434	VAPA	hsa-miR-371-5p	1	-12.8
Human	NM_133625	SYN2	hsa-miR-371-5p	1	-12.79
Human	NM_001431	EPB41L2	hsa-miR-371-5p	1	-12.76
Human	NM_178818;NM_181521	CMTM4	hsa-miR-371-5p	1	-12.76
Human	NM_017847	C1orf27	hsa-miR-371-5p	1	-12.72
Human	NM_001001702	FLJ33360	hsa-miR-371-5p	1	-12.68
Human	NM_001076786	QSER1	hsa-miR-371-5p	1	-12.66
Human	NM_001099677;NM_020844	C8orf79	hsa-miR-371-5p	2	-12.66
Human	NM_000497;NM_001026213	CYP11B1	hsa-miR-371-5p	1	-12.65
Human	NM_001002840;NM_018991	DKFZP434A0131	hsa-miR-371-5p	1	-12.63
Human	NM_022755	IPPK	hsa-miR-371-5p	1	-12.63
Human	NM_001004127	LOC440138	hsa-miR-371-5p	1	-12.56
Human	NM_006814;NM_178578	PSMF1	hsa-miR-371-5p	1	-12.55
Human	NM_006999	POLS	hsa-miR-371-5p	1	-12.53
Human	NM_014515	CNOT2	hsa-miR-371-5p	1	-12.53
Human	NM_207306	KIAA0495	hsa-miR-371-5p	1	-12.52
Human	NM_001006658;NM_001877	CR2	hsa-miR-371-5p	1	-12.51
Human	NM_002214	ITGB8	hsa-miR-371-5p	2	-12.49
Human	NM_018085	IPO9	hsa-miR-371-5p	2	-12.49
Human	NM_001025076;NM_001025077;NM_001083591;NM_006561	CUGBP2	hsa-miR-371-5p	1	-12.45
Human	NM_005759	ABI2	hsa-miR-371-5p	1	-12.45
Human	NM_020738	KIDINS220	hsa-miR-371-5p	1	-12.39
Human	NM_213589	RAPH1	hsa-miR-371-5p	2	-12.37
Human	NM_015294	TRIM37	hsa-miR-371-5p	1	-12.36
Human	NM_020408	C6orf149	hsa-miR-371-5p	1	-12.35
Human	NM_001406	EFNB3	hsa-miR-371-5p	1	-12.31
Human	NM_017896	C20orf11	hsa-miR-371-5p	1	-12.3
Human	NM_032581	DRCTNNB1A	hsa-miR-371-5p	1	-12.25
Human	NM_014730	KIAA0152	hsa-miR-371-5p	5	-12.24
Human	NM_001100398;NM_015085	GARNL4	hsa-miR-371-5p	1	-12.23
Human	NM_001100389	FLJ38482	hsa-miR-371-5p	1	-12.21
Human	NM_001077440;NM_001077441;NM_014739	BCLAF1	hsa-miR-371-5p	1	-12.19
Human	NM_001460	FMO2	hsa-miR-371-5p	1	-12.19
Human	NM_014844	KIAA0329	hsa-miR-371-5p	1	-12.18
Human	NM_014930	ZNF510	hsa-miR-371-5p	1	-12.18
Human	NM_001042537;NM_006359	SLC9A6	hsa-miR-371-5p	1	-12.17
Human	NM_004936;NM_078487	CDKN2B	hsa-miR-371-5p	1	-12.15
Human	NM_001160;NM_013229;NM_181861;NM_181868;NM_181869	APAF1	hsa-miR-371-5p	1	-12.14
Human	NM_005778	RBM5	hsa-miR-371-5p	1	-12.12
Human	NM_013286	RBM15B	hsa-miR-371-5p	1	-12.1
Human	NM_002760	PRKY	hsa-miR-371-5p	3	-12.09
Human	NM_021638;NM_198595	AFAP1	hsa-miR-371-5p	2	-12.08
Human	NM_001007793;NM_004725	BUB3	hsa-miR-371-5p	1	-12.05
Human	NM_207406	CCDC4	hsa-miR-371-5p	1	-12.05
Human	NM_004323	BAG1	hsa-miR-371-5p	2	-12.04
Human	NM_001024948	FNBP1L	hsa-miR-371-5p	2	-12.01
Human	NM_018222	PARVA	hsa-miR-371-5p	1	-11.99
Human	NM_213606	SLC16A12	hsa-miR-371-5p	1	-11.99
Human	NM_001040152;NM_015068	PEG10	hsa-miR-371-5p	1	-11.98
Human	NM_001009880;NM_015264	C22orf9	hsa-miR-371-5p	1	-11.97
Human	NM_016269	LEF1	hsa-miR-371-5p	1	-11.94
Human	NM_016604	JMJD1B	hsa-miR-371-5p	1	-11.9
Human	NM_017869;NM_079837	BANP	hsa-miR-371-5p	1	-11.87
Human	NM_024594	PANK3	hsa-miR-371-5p	1	-11.86
Human	NM_001080779;NM_001080950;NM_033375	MYO1C	hsa-miR-371-5p	1	-11.83
Human	NM_033238	PML	hsa-miR-371-5p	1	-11.79
Human	NM_015100;NM_207171	POGZ	hsa-miR-371-5p	1	-11.77
Human	NM_017515	SLC35F2	hsa-miR-371-5p	2	-11.77
Human	NM_020708	SLC12A5	hsa-miR-371-5p	1	-11.77
Human	NM_017592	IXL	hsa-miR-371-5p	1	-11.76
Human	NM_205848	SYT6	hsa-miR-371-5p	1	-11.75
Human	NM_018330	KIAA1598	hsa-miR-371-5p	1	-11.71
Human	NM_133445	GRIN3A	hsa-miR-371-5p	1	-11.7
Human	NM_153368	CX40.1	hsa-miR-371-5p	2	-11.68
Human	NM_153711	C6orf188	hsa-miR-371-5p	1	-11.67
Human	NM_194272	RBPMS2	hsa-miR-371-5p	1	-11.66
Human	NM_017814	FLJ20422	hsa-miR-371-5p	1	-11.64
Human	NM_030816	ANKRD13C	hsa-miR-371-5p	1	-11.64
Human	NM_145012;NM_181698	C10orf9	hsa-miR-371-5p	1	-11.64
Human	NM_003337	UBE2B	hsa-miR-371-5p	1	-11.62
Human	NM_003489	NRIP1	hsa-miR-371-5p	1	-11.62
Human	NM_177457;NM_177476;NM_177477	LYNX1	hsa-miR-371-5p	1	-11.62
Human	NM_152406	FLJ36748	hsa-miR-371-5p	2	-11.6
Human	NM_014924	KIAA0831	hsa-miR-371-5p	2	-11.59
Human	NM_001077700;NM_001077701;NM_020948	MIER1	hsa-miR-371-5p	1	-11.58
Human	NM_017966	VPS37C	hsa-miR-371-5p	2	-11.57
Human	NM_173833	SCARA5	hsa-miR-371-5p	1	-11.55
Human	NM_014005	PCDHA9	hsa-miR-371-5p	1	-11.54
Human	NM_001101676	SAMD12	hsa-miR-371-5p	2	-11.51
Human	NM_015086	DDN	hsa-miR-371-5p	1	-11.5
Human	NM_012253	TKTL1	hsa-miR-371-5p	1	-11.49
Human	NM_020946	DENND1A	hsa-miR-371-5p	1	-11.49
Human	NM_182501	MTERFD2	hsa-miR-371-5p	1	-11.48
Human	NM_015297	KIAA1045	hsa-miR-371-5p	1	-11.47
Human	NM_001024647;NM_022456;NM_175623;NM_175624;NM_175625	RAB3IP	hsa-miR-371-5p	3	-11.44
Human	NM_021961	TEAD1	hsa-miR-371-5p	2	-11.44
Human	NM_001001974;NM_021622	PLEKHA1	hsa-miR-371-5p	1	-11.43
Human	NM_025061	LRRC8E	hsa-miR-371-5p	1	-11.41
Human	NM_001827	CKS2	hsa-miR-371-5p	1	-11.4
Human	NM_002158	FOXN2	hsa-miR-371-5p	1	-11.38
Human	NM_001085357;NM_181780	BTLA	hsa-miR-371-5p	2	-11.37
Human	NM_001101653;NM_014186	COMMD9	hsa-miR-371-5p	1	-11.37
Human	NM_020228;NM_199437;NM_199438;NM_199439	PRDM10	hsa-miR-371-5p	1	-11.37
Human	NM_052940	LRRC42	hsa-miR-371-5p	1	-11.33
Human	NM_173075	APBB2	hsa-miR-371-5p	1	-11.32
Human	NM_001018089;NM_024611	NARG2	hsa-miR-371-5p	3	-11.29
Human	NM_016312	WBP11	hsa-miR-371-5p	1	-11.28
Human	NM_002442	MSI1	hsa-miR-371-5p	1	-11.27
Human	NM_004858	SLC4A8	hsa-miR-371-5p	1	-11.21
Human	NM_019044	FLJ10996	hsa-miR-371-5p	3	-11.2
Human	NM_018019	MED9	hsa-miR-371-5p	2	-11.18
Human	NM_033030;NM_197970	BOLL	hsa-miR-371-5p	1	-11.18
Human	NM_182691;NM_182692	SRPK2	hsa-miR-371-5p	1	-11.18
Human	NM_001040431	CCDC56	hsa-miR-371-5p	2	-11.17
Human	NM_001010867	C1orf69	hsa-miR-371-5p	2	-11.16
Human	NM_177538	CYP20A1	hsa-miR-371-5p	7	-11.16
Human	NM_001017395;NM_015008	TMCC1	hsa-miR-371-5p	1	-11.15
Human	NM_003131	SRF	hsa-miR-371-5p	1	-11.13
Human	NM_018131	CEP55	hsa-miR-371-5p	1	-11.13
Human	NM_004808	NMT2	hsa-miR-371-5p	1	-11.11
Human	NM_006867	RBPMS	hsa-miR-371-5p	1	-11.08
Human	NM_001004316	FLJ16641	hsa-miR-371-5p	1	-11.06
Human	NM_052899	KIAA1893	hsa-miR-371-5p	1	-11.06
Human	NM_014991;NM_178585	WDFY3	hsa-miR-371-5p	1	-11.05
Human	NM_145185	MAP2K7	hsa-miR-371-5p	1	-11.03
Human	NM_001024843;NM_015088	TNRC6B	hsa-miR-371-5p	2	-11.02
Human	NM_001012755	MCART6	hsa-miR-371-5p	1	-11.01
Human	NM_006315	PCGF3	hsa-miR-371-5p	2	-11
Human	NM_017902	HIF1AN	hsa-miR-371-5p	1	-10.98
Human	NM_015341	BRRN1	hsa-miR-371-5p	1	-10.96
Human	NM_024671	ZNF768	hsa-miR-371-5p	1	-10.95
Human	NM_000672	ADH6	hsa-miR-371-5p	1	-10.91
Human	NM_001025072;NM_001025073;NM_015412	C3orf17	hsa-miR-371-5p	2	-10.9
Human	NM_030806	C1orf21	hsa-miR-371-5p	1	-10.88
Human	NM_144657	CXorf43	hsa-miR-371-5p	1	-10.88
Human	NM_078625	VNN3	hsa-miR-371-5p	1	-10.84
Human	NM_213609	FAM19A1	hsa-miR-371-5p	1	-10.82
Human	NM_020337	ANKRD50	hsa-miR-371-5p	1	-10.81
Human	NM_016422	RNF141	hsa-miR-371-5p	2	-10.79
Human	NM_052931	SLAMF6	hsa-miR-371-5p	1	-10.79
Human	NM_016353	ZDHHC2	hsa-miR-371-5p	2	-10.78
Human	NM_006930;NM_170679	SKP1A	hsa-miR-371-5p	1	-10.77
Human	NM_014615	KIAA0182	hsa-miR-371-5p	1	-10.77
Human	NM_000112	SLC26A2	hsa-miR-371-5p	1	-10.74
Human	NM_001001928;NM_005036	PPARA	hsa-miR-371-5p	2	-10.74
Human	NM_020823	TMEM181	hsa-miR-371-5p	1	-10.74
Human	NM_000876	IGF2R	hsa-miR-371-5p	1	-10.71
Human	NM_001042555;NM_006654	FRS2	hsa-miR-371-5p	2	-10.71
Human	NM_054030	MRGPRX2	hsa-miR-371-5p	1	-10.7
Human	NM_144664	FAM76B	hsa-miR-371-5p	1	-10.7
Human	NM_030793;NM_205836	FBXO38	hsa-miR-371-5p	2	-10.69
Human	NM_006287	TFPI	hsa-miR-371-5p	1	-10.68
Human	NM_006275	SFRS6	hsa-miR-371-5p	2	-10.66
Human	NM_015045	WAPAL	hsa-miR-371-5p	1	-10.65
Human	NM_153646;NM_153647;NM_153648	SLC24A4	hsa-miR-371-5p	1	-10.65
Human	NM_021190	PTBP2	hsa-miR-371-5p	1	-10.63
Human	NM_001042549;NM_015471	C1orf48	hsa-miR-371-5p	1	-10.62
Human	NM_022080	NAPB	hsa-miR-371-5p	1	-10.62
Human	NM_020698	TMCC3	hsa-miR-371-5p	1	-10.61
Human	NM_001077427;NM_144586	LYPD1	hsa-miR-371-5p	1	-10.6
Human	NM_173462	PAPLN	hsa-miR-371-5p	1	-10.59
Human	NM_014039	C11orf54	hsa-miR-371-5p	1	-10.57
Human	NM_030961	TRIM56	hsa-miR-371-5p	2	-10.57
Human	NM_005434	MALL	hsa-miR-371-5p	1	-10.54
Human	NM_024837	ATP8B4	hsa-miR-371-5p	1	-10.53
Human	NM_000773	CYP2E1	hsa-miR-371-5p	1	-10.51
Human	NM_145115	ZNF498	hsa-miR-371-5p	1	-10.48
Human	NM_005500	SAE1	hsa-miR-371-5p	1	-10.47
Human	NM_213605	ZNF517	hsa-miR-371-5p	1	-10.47
Human	NM_005392	PHF2	hsa-miR-371-5p	1	-10.46
Human	NM_173529	C18orf54	hsa-miR-371-5p	1	-10.46
Human	NM_173484	KLF17	hsa-miR-371-5p	1	-10.45
Human	NM_013318	KIAA0515	hsa-miR-371-5p	1	-10.44
Human	NM_004392;NM_080759;NM_080760	DACH1	hsa-miR-371-5p	1	-10.43
Human	NM_017824	2015-03-05	hsa-miR-371-5p	1	-10.43
Human	NM_001010986;NM_173694	ATP11C	hsa-miR-371-5p	1	-10.42
Human	NM_013333	EPN1	hsa-miR-371-5p	1	-10.42
Human	NM_017681	FLJ20130	hsa-miR-371-5p	1	-10.41
Human	NM_206893	MS4A10	hsa-miR-371-5p	1	-10.41
Human	NM_002025	AFF2	hsa-miR-371-5p	1	-10.4
Human	NM_005898	GPIAP1	hsa-miR-371-5p	1	-10.4
Human	NM_003344;NM_182697	UBE2H	hsa-miR-371-5p	1	-10.39
Human	NM_004273	CHST3	hsa-miR-371-5p	2	-10.39
Human	NM_000376;NM_001017535	VDR	hsa-miR-371-5p	1	-10.38
Human	NM_022661	SPANXC	hsa-miR-371-5p	1	-10.38
Human	NM_001040001	MLLT4	hsa-miR-371-5p	1	-10.36
Human	NM_020782	KLHDC5	hsa-miR-371-5p	1	-10.36
Human	NM_024989	PGAP1	hsa-miR-371-5p	5	-10.35
Human	NM_021163	RBAK	hsa-miR-371-5p	1	-10.29
Human	NM_138323;NM_138324	PCSK6	hsa-miR-371-5p	1	-10.29
Human	NM_004571	PKNOX1	hsa-miR-371-5p	2	-10.28
Human	NM_002420	TRPM1	hsa-miR-371-5p	1	-10.27
Human	NM_000346	SOX9	hsa-miR-371-5p	1	-10.26
Human	NM_017637	BNC2	hsa-miR-371-5p	1	-10.25
Human	NM_024759	NPAL2	hsa-miR-371-5p	1	-10.25
Human	NM_153690	FAM43A	hsa-miR-371-5p	1	-10.25
Human	NM_001040151;NM_018400	SCN3B	hsa-miR-371-5p	1	-10.24
Human	NM_006212	PFKFB2	hsa-miR-371-5p	2	-10.22
Human	NM_014506	TOR1B	hsa-miR-371-5p	1	-10.22
Human	NM_173156;NM_201568;NM_201569	SMG7	hsa-miR-371-5p	1	-10.21
Human	NM_001042543;NM_006529	GLRA3	hsa-miR-371-5p	1	-10.19
Human	NM_006420	ARFGEF2	hsa-miR-371-5p	1	-10.19
Human	NM_015553	PIP3-E	hsa-miR-371-5p	1	-10.18
Human	NM_016173	HEMK1	hsa-miR-371-5p	1	-10.18
Human	NM_020462	ERGIC1	hsa-miR-371-5p	1	-10.18
Human	NM_001771	CD22	hsa-miR-371-5p	1	-10.17
Human	NM_144976	ZNF564	hsa-miR-371-5p	1	-10.16
Human	NM_004878	PTGES	hsa-miR-371-5p	1	-10.15
Human	NM_032417;NM_145665	SPANXD	hsa-miR-371-5p	1	-10.15
Human	NM_001006932;NM_021135	RPS6KA2	hsa-miR-371-5p	1	-10.14
Human	NM_001099455;NM_018340	FLJ11151	hsa-miR-371-5p	2	-10.12
Human	NM_003766	BECN1	hsa-miR-371-5p	2	-10.12
Human	NM_001040000	MLLT4	hsa-miR-371-5p	2	-10.11
Human	NM_001085384	ZNF154	hsa-miR-371-5p	1	-10.08
Human	NM_018425	PI4KII	hsa-miR-371-5p	1	-10.07
Human	NM_004346;NM_032991	CASP3	hsa-miR-371-5p	1	-10.05
Human	NM_000611;NM_203329;NM_203330;NM_203331	CD59	hsa-miR-371-5p	2	-10.04
Human	NM_001007024;NM_001007025;NM_004871	GOSR1	hsa-miR-371-5p	3	-10.04
Human	NM_006546	IGF2BP1	hsa-miR-371-5p	1	-10.04
Human	NM_014925	R3HDM2	hsa-miR-371-5p	1	-10.04
Human	NM_001100412;NM_013235	RNASEN	hsa-miR-371-5p	1	-10.03
Human	NM_017772	TBC1D22B	hsa-miR-371-5p	1	-10.03
Human	NM_006553	C18orf43	hsa-miR-371-5p	2	-10.02
Human	NM_005342	HMGB3	hsa-miR-371-5p	1	-10.01
Human	NM_032689	ZNF607	hsa-miR-371-5p	1	-10.01
Human	NM_152265	BTF3L4	hsa-miR-371-5p	1	-9.99
Human	NM_007003	PAGE4	hsa-miR-371-5p	1	-9.98
Human	NM_005957	MTHFR	hsa-miR-371-5p	2	-9.96
Human	NM_014344	FJX1	hsa-miR-371-5p	1	-9.96
Human	NM_020398;NM_181502	SPINLW1	hsa-miR-371-5p	1	-9.96
Human	NM_001004334	GPR179	hsa-miR-371-5p	1	-9.95
Human	NM_016009	SH3GLB1	hsa-miR-371-5p	1	-9.95
Human	NM_001104558;NM_024930	ELOVL7	hsa-miR-371-5p	1	-9.94
Human	NM_003417	ZNF264	hsa-miR-371-5p	4	-9.94
Human	NM_021643	TRIB2	hsa-miR-371-5p	1	-9.92
Human	NM_001031734	MGC19604	hsa-miR-371-5p	1	-9.9
Human	NM_001010898	SLC6A17	hsa-miR-371-5p	1	-9.89
Human	NM_014877	HELZ	hsa-miR-371-5p	2	-9.89
Human	NM_015230;NM_139182	CENTD1	hsa-miR-371-5p	1	-9.89
Human	NM_001024924;NM_018261;NM_178237	EXOC1	hsa-miR-371-5p	1	-9.88
Human	NM_002589	PCDH7	hsa-miR-371-5p	1	-9.88
Human	NM_000950	PRRG1	hsa-miR-371-5p	1	-9.87
Human	NM_000103;NM_031226	CYP19A1	hsa-miR-371-5p	1	-9.86
Human	NM_014562	OTX1	hsa-miR-371-5p	1	-9.86
Human	NM_001018057;NM_013253;NM_015881	DKK3	hsa-miR-371-5p	1	-9.85
Human	NM_001077349;NM_033196	ZNF682	hsa-miR-371-5p	1	-9.85
Human	NM_173483	CYP4F22	hsa-miR-371-5p	1	-9.84
Human	NM_198529	FLJ46247	hsa-miR-371-5p	1	-9.84
Human	NM_001040214	TCBA1	hsa-miR-371-5p	1	-9.83
Human	NM_001421	ELF4	hsa-miR-371-5p	1	-9.82
Human	NM_021994	ZNF277P	hsa-miR-371-5p	1	-9.82
Human	NM_005402	RALA	hsa-miR-371-5p	1	-9.81
Human	NM_006052	DSCR3	hsa-miR-371-5p	1	-9.81
Human	NM_015079	TBC1D2B	hsa-miR-371-5p	1	-9.81
Human	NM_020854	KIAA1468	hsa-miR-371-5p	1	-9.81
Human	NM_152729	NT5DC1	hsa-miR-371-5p	2	-9.8
Human	NM_018206	VPS35	hsa-miR-371-5p	2	-9.79
Human	NM_153442	GPR26	hsa-miR-371-5p	1	-9.79
Human	NM_001081	CUBN	hsa-miR-371-5p	2	-9.78
Human	NM_002536	TBC1D25	hsa-miR-371-5p	1	-9.78
Human	NM_007038	ADAMTS5	hsa-miR-371-5p	2	-9.76
Human	NM_014798	PLEKHM1	hsa-miR-371-5p	1	-9.76
Human	NM_015154	MESDC2	hsa-miR-371-5p	1	-9.75
Human	NM_000139	MS4A2	hsa-miR-371-5p	2	-9.74
Human	NM_012290	TLK1	hsa-miR-371-5p	1	-9.74
Human	NM_001312	CRIP2	hsa-miR-371-5p	1	-9.73
Human	NM_144973	MGC24039	hsa-miR-371-5p	2	-9.73
Human	NM_182705	FAM101B	hsa-miR-371-5p	1	-9.72
Human	NM_001011513;NM_006457	PDLIM5	hsa-miR-371-5p	2	-9.7
Human	NM_002048	GAS1	hsa-miR-371-5p	1	-9.7
Human	NM_000921	PDE3A	hsa-miR-371-5p	1	-9.69
Human	NM_006364	SEC23A	hsa-miR-371-5p	1	-9.69
Human	NM_025187	LIN10	hsa-miR-371-5p	1	-9.67
Human	NM_138400	NOM1	hsa-miR-371-5p	1	-9.67
Human	NM_006802	SF3A3	hsa-miR-371-5p	1	-9.66
Human	NM_002817;NM_175932	PSMD13	hsa-miR-371-5p	1	-9.65
Human	NM_152520	ZNF533	hsa-miR-371-5p	1	-9.65
Human	NM_194314	ZBTB41	hsa-miR-371-5p	2	-9.64
Human	NM_015604;NM_181340;NM_181341	WDR21A	hsa-miR-371-5p	1	-9.62
Human	NM_000637	GSR	hsa-miR-371-5p	1	-9.6
Human	NM_002885	RAP1GA1	hsa-miR-371-5p	1	-9.59
Human	NM_000318;NM_001079867	PXMP3	hsa-miR-371-5p	2	-9.58
Human	NM_005436	CCDC6	hsa-miR-371-5p	1	-9.58
Human	NM_007368	RASA3	hsa-miR-371-5p	1	-9.58
Human	NM_023008	FLJ12949	hsa-miR-371-5p	1	-9.58
Human	NM_144570	C16orf34	hsa-miR-371-5p	2	-9.56
Human	NM_018260	ZNF701	hsa-miR-371-5p	2	-9.54
Human	NM_001039840	CHIC1	hsa-miR-371-5p	1	-9.53
Human	NM_017798	YTHDF1	hsa-miR-371-5p	1	-9.53
Human	NM_004685	MTMR6	hsa-miR-371-5p	1	-9.5
Human	NM_003559	PIP5K2B	hsa-miR-371-5p	1	-9.49
Human	NM_001008537	KIAA2022	hsa-miR-371-5p	2	-9.47
Human	NM_007137	ZNF81	hsa-miR-371-5p	1	-9.46
Human	NM_003684	MKNK1	hsa-miR-371-5p	1	-9.45
Human	NM_014840	NUAK1	hsa-miR-371-5p	1	-9.45
Human	NM_001011885;NM_025238	BTBD1	hsa-miR-371-5p	1	-9.44
Human	NM_003438	ZNF137	hsa-miR-371-5p	1	-9.44
Human	NM_152337	C16orf46	hsa-miR-371-5p	1	-9.44
Human	NM_001017369;NM_006745	SC4MOL	hsa-miR-371-5p	1	-9.43
Human	NM_001039891	ZNF674	hsa-miR-371-5p	1	-9.43
Human	NM_001042697;NM_001042698	SWS1	hsa-miR-371-5p	1	-9.42
Human	NM_201651	SLC28A1	hsa-miR-371-5p	1	-9.42
Human	NM_001066	TNFRSF1B	hsa-miR-371-5p	1	-9.41
Human	NM_004066	CETN1	hsa-miR-371-5p	1	-9.41
Human	NM_016021	UBE2J1	hsa-miR-371-5p	1	-9.41
Human	NM_024854	FLJ22028	hsa-miR-371-5p	1	-9.41
Human	NM_002270;NM_153188	TNPO1	hsa-miR-371-5p	2	-9.39
Human	NM_012384	GMEB2	hsa-miR-371-5p	1	-9.39
Human	NM_144693	ZNF558	hsa-miR-371-5p	1	-9.39
Human	NM_005188	CBL	hsa-miR-371-5p	1	-9.38
Human	NM_016066;NM_197962	GLRX2	hsa-miR-371-5p	1	-9.37
Human	NM_016263	FZR1	hsa-miR-371-5p	1	-9.37
Human	NM_022735	ACBD3	hsa-miR-371-5p	1	-9.35
Human	NM_032303	HSDL2	hsa-miR-371-5p	1	-9.35
Human	NM_000702	ATP1A2	hsa-miR-371-5p	1	-9.34
Human	NM_001017964	LOC150223	hsa-miR-371-5p	1	-9.34
Human	NM_019063	EML4	hsa-miR-371-5p	1	-9.33
Human	NM_174900	ZFP42	hsa-miR-371-5p	1	-9.33
Human	NM_001032289;NM_001042498	SLC35A2	hsa-miR-371-5p	1	-9.32
Human	NM_020447	C15orf17	hsa-miR-371-5p	1	-9.32
Human	NM_175871	FLJ35119	hsa-miR-371-5p	1	-9.32
Human	NM_182502	TMPRSS11B	hsa-miR-371-5p	1	-9.31
Human	NM_005048	PTHR2	hsa-miR-371-5p	1	-9.3
Human	NM_005512	LRRC32	hsa-miR-371-5p	1	-9.29
Human	NM_001001661	ZNF425	hsa-miR-371-5p	1	-9.28
Human	NM_001010851	LOC90321	hsa-miR-371-5p	3	-9.27
Human	NM_013448;NM_182648	BAZ1A	hsa-miR-371-5p	1	-9.27
Human	NM_024884	L2HGDH	hsa-miR-371-5p	1	-9.26
Human	NM_033103	RHPN2	hsa-miR-371-5p	1	-9.26
Human	NM_004091	E2F2	hsa-miR-371-5p	1	-9.24
Human	NM_014868	RNF10	hsa-miR-371-5p	1	-9.24
Human	NM_015455	CNOT6	hsa-miR-371-5p	2	-9.22
Human	NM_021130	PPIA	hsa-miR-371-5p	1	-9.22
Human	NM_005146	SART1	hsa-miR-371-5p	2	-9.21
Human	NM_007084	SOX21	hsa-miR-371-5p	1	-9.21
Human	NM_014298	QPRT	hsa-miR-371-5p	1	-9.2
Human	NM_003999	OSMR	hsa-miR-371-5p	1	-9.17
Human	NM_013447;NM_152916;NM_152917;NM_152918;NM_152919;NM_152920;NM_152921	EMR2	hsa-miR-371-5p	1	-9.15
Human	NM_052903	TUBGCP5	hsa-miR-371-5p	1	-9.15
Human	NM_022758;NM_024294	C6orf106	hsa-miR-371-5p	2	-9.14
Human	NM_022840	METTL4	hsa-miR-371-5p	1	-9.14
Human	NM_032623	OSAP	hsa-miR-371-5p	1	-9.14
Human	NM_017662	TRPM6	hsa-miR-371-5p	1	-9.13
Human	NM_032440	LCOR	hsa-miR-371-5p	1	-9.1
Human	NM_020122	KCMF1	hsa-miR-371-5p	1	-9.08
Human	NM_001024460;NM_018399;NM_078625	VNN3	hsa-miR-371-5p	1	-9.07
Human	NM_015347	RIMBP2	hsa-miR-371-5p	1	-9.07
Human	NM_020768	KCTD16	hsa-miR-371-5p	1	-9.07
Human	NM_006045	ATP9A	hsa-miR-371-5p	2	-9.04
Human	NM_145278	C1orf150	hsa-miR-371-5p	3	-9.02
Human	NM_001077484;NM_030674	SLC38A1	hsa-miR-371-5p	2	-9.01
Human	NM_152737	RNF182	hsa-miR-371-5p	1	-9.01
Human	NM_001008528	MXRA7	hsa-miR-371-5p	1	-9
Human	NM_004132	HABP2	hsa-miR-371-5p	1	-9
Human	NM_014864	FAM20B	hsa-miR-371-5p	1	-8.99
Human	NM_030645	SH3BP5L	hsa-miR-371-5p	1	-8.99
Human	NM_032560	KIAA2010	hsa-miR-371-5p	1	-8.98
Human	NM_025208;NM_033135	PDGFD	hsa-miR-371-5p	2	-8.97
Human	NM_001903	CTNNA1	hsa-miR-371-5p	1	-8.96
Human	NM_018403	DCP1A	hsa-miR-371-5p	1	-8.95
Human	NM_032738	FCRLM1	hsa-miR-371-5p	1	-8.95
Human	NM_133493	CD109	hsa-miR-371-5p	1	-8.95
Human	NM_000237	LPL	hsa-miR-371-5p	2	-8.94
Human	NM_152411	ZNF786	hsa-miR-371-5p	1	-8.94
Human	NM_145174	DNAJB7	hsa-miR-371-5p	2	-8.91
Human	NM_001037165	FOXK1	hsa-miR-371-5p	3	-8.9
Human	NM_152623	FLJ37927	hsa-miR-371-5p	1	-8.9
Human	NM_177550	SLC13A5	hsa-miR-371-5p	1	-8.9
Human	NM_022780	FLJ13910	hsa-miR-371-5p	1	-8.89
Human	NM_001010891	MTX3	hsa-miR-371-5p	1	-8.88
Human	NM_001080114;NM_007078	LDB3	hsa-miR-371-5p	1	-8.87
Human	NM_001039547	MGC40579	hsa-miR-371-5p	3	-8.85
Human	NM_173536	GABRG1	hsa-miR-371-5p	1	-8.85
Human	NM_006629	ZNF271	hsa-miR-371-5p	1	-8.84
Human	NM_005009	NME4	hsa-miR-371-5p	1	-8.81
Human	NM_006700	TRAFD1	hsa-miR-371-5p	1	-8.8
Human	NM_003298	NR2C2	hsa-miR-371-5p	2	-8.79
Human	NM_014766	SCRN1	hsa-miR-371-5p	1	-8.79
Human	NM_032584	ZNF347	hsa-miR-371-5p	1	-8.78
Human	NM_021624	HRH4	hsa-miR-371-5p	1	-8.77
Human	NM_001077500;NM_002776;NM_145888	KLK10	hsa-miR-371-5p	1	-8.76
Human	NM_002662	PLD1	hsa-miR-371-5p	1	-8.76
Human	NM_006581	FUT9	hsa-miR-371-5p	1	-8.76
Human	NM_016395	PTPLAD1	hsa-miR-371-5p	1	-8.75
Human	NM_173799	VSIG9	hsa-miR-371-5p	1	-8.75
Human	NM_016239	MYO15A	hsa-miR-371-5p	1	-8.74
Human	NM_001001685	FLJ45079	hsa-miR-371-5p	1	-8.72
Human	NM_001010980	C1orf130	hsa-miR-371-5p	2	-8.72
Human	NM_006252	PRKAA2	hsa-miR-371-5p	1	-8.72
Human	NM_015517;NM_198971	MIZF	hsa-miR-371-5p	1	-8.72
Human	NM_174899	FBXO36	hsa-miR-371-5p	1	-8.72
Human	NM_178313	SPTBN1	hsa-miR-371-5p	1	-8.72
Human	NM_003128	SPTBN1	hsa-miR-371-5p	2	-8.71
Human	NM_001081573;NM_080612	GAB3	hsa-miR-371-5p	1	-8.7
Human	NM_002431	MNAT1	hsa-miR-371-5p	1	-8.69
Human	NM_015111	N4BP3	hsa-miR-371-5p	1	-8.69
Human	NM_144778;NM_207304	MBNL2	hsa-miR-371-5p	2	-8.69
Human	NM_001511	CXCL1	hsa-miR-371-5p	1	-8.68
Human	NM_006085	BPNT1	hsa-miR-371-5p	1	-8.68
Human	NM_130848	C5orf20	hsa-miR-371-5p	1	-8.68
Human	NM_013345	GPR132	hsa-miR-371-5p	1	-8.67
Human	NM_001858	COL19A1	hsa-miR-371-5p	1	-8.66
Human	NM_005065	SEL1L	hsa-miR-371-5p	1	-8.66
Human	NM_020700	PPM1H	hsa-miR-371-5p	1	-8.66
Human	NM_024881	SLC35E1	hsa-miR-371-5p	1	-8.66
Human	NM_001012994	SNX30	hsa-miR-371-5p	1	-8.64
Human	NM_003074	SMARCC1	hsa-miR-371-5p	1	-8.64
Human	NM_004093	EFNB2	hsa-miR-371-5p	1	-8.64
Human	NM_181701	QSOX2	hsa-miR-371-5p	1	-8.64
Human	NM_001031804	MAF	hsa-miR-371-5p	1	-8.63
Human	NM_173570	ZDHHC23	hsa-miR-371-5p	1	-8.63
Human	NM_080831	DEFB129	hsa-miR-371-5p	1	-8.62
Human	NM_031947	SLC25A2	hsa-miR-371-5p	1	-8.61
Human	NM_032307	C9orf64	hsa-miR-371-5p	2	-8.61
Human	NM_201264	NRP2	hsa-miR-371-5p	1	-8.61
Human	NM_001100623;NM_017958	PLEKHB2	hsa-miR-371-5p	3	-8.6
Human	NM_001030288;NM_003123	SPN	hsa-miR-371-5p	3	-8.59
Human	NM_015291	DNAJC16	hsa-miR-371-5p	1	-8.59
Human	NM_004845	PCYT1B	hsa-miR-371-5p	1	-8.56
Human	NM_006933	SLC5A3	hsa-miR-371-5p	3	-8.55
Human	NM_030774	OR51E2	hsa-miR-371-5p	1	-8.55
Human	NM_017773	LAX1	hsa-miR-371-5p	1	-8.54
Human	NM_024843	CYBRD1	hsa-miR-371-5p	1	-8.54
Human	NM_177966	2'-PDE	hsa-miR-371-5p	1	-8.54
Human	NM_001003794;NM_007283	MGLL	hsa-miR-371-5p	1	-8.53
Human	NM_007054	KIF3A	hsa-miR-371-5p	1	-8.53
Human	NM_032373	PCGF5	hsa-miR-371-5p	1	-8.53
Human	NM_006062	SMYD5	hsa-miR-371-5p	1	-8.52
Human	NM_001012706	LOC283551	hsa-miR-371-5p	1	-8.5
Human	NM_001013627	LOC340527	hsa-miR-371-5p	2	-8.49
Human	NM_001042540;NM_007362	NCBP2	hsa-miR-371-5p	1	-8.49
Human	NM_001024074	HNMT	hsa-miR-371-5p	1	-8.46
Human	NM_139076	CCDC98	hsa-miR-371-5p	2	-8.45
Human	NM_001008801;NM_199132	ZNF468	hsa-miR-371-5p	1	-8.44
Human	NM_002871	RABIF	hsa-miR-371-5p	2	-8.44
Human	NM_005270	GLI2	hsa-miR-371-5p	1	-8.44
Human	NM_017741	FLJ20280	hsa-miR-371-5p	1	-8.42
Human	NM_015627	LDLRAP1	hsa-miR-371-5p	2	-8.41
Human	NM_001401;NM_057159	EDG2	hsa-miR-371-5p	1	-8.4
Human	NM_020927	KIAA1576	hsa-miR-371-5p	2	-8.39
Human	NM_003786	ABCC3	hsa-miR-371-5p	1	-8.38
Human	NM_012306	FAIM2	hsa-miR-371-5p	1	-8.38
Human	NM_153262	SYT14	hsa-miR-371-5p	1	-8.38
Human	NM_000212	ITGB3	hsa-miR-371-5p	1	-8.37
Human	NM_017528	WBSCR22	hsa-miR-371-5p	1	-8.37
Human	NM_004441	EPHB1	hsa-miR-371-5p	1	-8.36
Human	NM_001002914	KCTD11	hsa-miR-371-5p	1	-8.35
Human	NM_012193	FZD4	hsa-miR-371-5p	2	-8.34
Human	NM_031460	KCNK17	hsa-miR-371-5p	1	-8.34
Human	NM_002640;NM_198833	SERPINB8	hsa-miR-371-5p	1	-8.33
Human	NM_016578	HBXAP	hsa-miR-371-5p	1	-8.33
Human	NM_001002026;NM_016369	CLDN18	hsa-miR-371-5p	1	-8.32
Human	NM_001012991	LOC400506	hsa-miR-371-5p	1	-8.32
Human	NM_001099270	ZBTB34	hsa-miR-371-5p	2	-8.32
Human	NM_173495	PTCHD1	hsa-miR-371-5p	2	-8.32
Human	NM_018697	LANCL2	hsa-miR-371-5p	1	-8.3
Human	NM_001100829	LOC100113407	hsa-miR-371-5p	2	-8.29
Human	NM_014994	MAPKBP1	hsa-miR-371-5p	1	-8.29
Human	NM_001032363	C1orf151	hsa-miR-371-5p	1	-8.28
Human	NM_001204	BMPR2	hsa-miR-371-5p	1	-8.28
Human	NM_003202;NM_201632;NM_201634;NM_213648	TCF7	hsa-miR-371-5p	1	-8.28
Human	NM_032815	NFATC2IP	hsa-miR-371-5p	1	-8.27
Human	NM_003496	TRRAP	hsa-miR-371-5p	1	-8.25
Human	NM_001013399;NM_005190	CCNC	hsa-miR-371-5p	1	-8.24
Human	NM_006969	ZNF28	hsa-miR-371-5p	2	-8.24
Human	NM_006259	PRKG2	hsa-miR-371-5p	1	-8.23
Human	NM_014517	UBP1	hsa-miR-371-5p	1	-8.23
Human	NM_005897	IPP	hsa-miR-371-5p	1	-8.22
Human	NM_031474	NRIP2	hsa-miR-371-5p	2	-8.22
Human	NM_000417	IL2RA	hsa-miR-371-5p	1	-8.21
Human	NM_023076	C16orf28	hsa-miR-371-5p	1	-8.21
Human	NM_133374	ZNF618	hsa-miR-371-5p	1	-8.21
Human	NM_021205	RHOU	hsa-miR-371-5p	2	-8.2
Human	NM_198549	FAM73A	hsa-miR-371-5p	3	-8.2
Human	NM_014911	AAK1	hsa-miR-371-5p	5	-8.19
Human	NM_001098812;NM_001098813;NM_015146	2015-09-08	hsa-miR-371-5p	1	-8.18
Human	NM_001030060	LOC389432	hsa-miR-371-5p	1	-8.17
Human	NM_001079843	CASZ1	hsa-miR-371-5p	1	-8.16
Human	NM_014051	TMEM14A	hsa-miR-371-5p	1	-8.16
Human	NM_017952	FLJ20758	hsa-miR-371-5p	2	-8.16
Human	NM_032772	ZNF503	hsa-miR-371-5p	1	-8.16
Human	NM_006298	ZNF192	hsa-miR-371-5p	2	-8.15
Human	NM_001079839;NM_001079840;NM_001079841;NM_001079842;NM_017830	OCIAD1	hsa-miR-371-5p	1	-8.13
Human	NM_144567	ANGEL2	hsa-miR-371-5p	1	-8.13
Human	NM_000399	EGR2	hsa-miR-371-5p	1	-8.12
Human	NM_173663	NY-REN-7	hsa-miR-371-5p	1	-8.12
Human	NM_022106	C20orf177	hsa-miR-371-5p	1	-8.11
Human	NM_001859	SLC31A1	hsa-miR-371-5p	2	-8.1
Human	NM_007332	TRPA1	hsa-miR-371-5p	1	-8.1
Human	NM_025009	CEP135	hsa-miR-371-5p	1	-8.1
Human	NM_005002	NDUFA9	hsa-miR-371-5p	1	-8.09
Human	NM_005813	PRKD3	hsa-miR-371-5p	1	-8.09
Human	NM_145796	POGZ	hsa-miR-371-5p	1	-8.09
Human	NM_001080421	UNC13A	hsa-miR-371-5p	1	-8.08
Human	NM_007125	UTY	hsa-miR-371-5p	1	-8.07
Human	NM_012106	ARL2BP	hsa-miR-371-5p	1	-8.06
Human	NM_002430	MN1	hsa-miR-371-5p	1	-8.05
Human	NM_033386	MICAL-L1	hsa-miR-371-5p	1	-8.05
Human	NM_002508	NID1	hsa-miR-371-5p	1	-8.04
Human	NM_001033026;NM_033420	C19orf6	hsa-miR-371-5p	1	-8.03
Human	NM_173079	RUNDC1	hsa-miR-371-5p	1	-8.03
Human	NM_005130	FGFBP1	hsa-miR-371-5p	1	-8.01
Human	NM_014936	ENPP4	hsa-miR-371-5p	1	-8.01
Human	NM_015042	ZNF609	hsa-miR-371-5p	1	-8.01
Human	NM_054027	ANKH	hsa-miR-371-5p	1	-8.01
Human	NM_015353	KCTD2	hsa-miR-371-5p	1	-8
Human	NM_000866	HTR1F	hsa-miR-371-5p	1	-7.99
Human	NM_001081686;NM_021176	G6PC2	hsa-miR-371-5p	1	-7.99
Human	NM_001789;NM_201567	CDC25A	hsa-miR-371-5p	1	-7.98
Human	NM_018235	CNDP2	hsa-miR-371-5p	1	-7.98
Human	NM_004840	ARHGEF6	hsa-miR-371-5p	1	-7.97
Human	NM_007220	CA5B	hsa-miR-371-5p	2	-7.97
Human	NM_007198	PROSC	hsa-miR-371-5p	2	-7.96
Human	NM_001080523	ARRDC5	hsa-miR-371-5p	1	-7.95
Human	NM_004560	ROR2	hsa-miR-371-5p	1	-7.95
Human	NM_021641	ADAM12	hsa-miR-371-5p	1	-7.95
Human	NM_002089	CXCL2	hsa-miR-371-5p	1	-7.94
Human	NM_004792	PPIG	hsa-miR-371-5p	1	-7.94
Human	NM_004185;NM_024494	WNT2B	hsa-miR-371-5p	1	-7.92
Human	NM_022459	XPO4	hsa-miR-371-5p	1	-7.92
Human	NM_001042601;NM_133462	TTC14	hsa-miR-371-5p	1	-7.91
Human	NM_016129	COPS4	hsa-miR-371-5p	1	-7.91
Human	NM_016340	RAPGEF6	hsa-miR-371-5p	2	-7.9
Human	NM_014263;NM_139312	YME1L1	hsa-miR-371-5p	1	-7.89
Human	NM_016218	POLK	hsa-miR-371-5p	1	-7.89
Human	NM_148178;NM_148179	C9orf23	hsa-miR-371-5p	1	-7.88
Human	NM_001668;NM_178426;NM_178427	ARNT	hsa-miR-371-5p	1	-7.87
Human	NM_178510	ANKK1	hsa-miR-371-5p	1	-7.87
Human	NM_182515	ZNF714	hsa-miR-371-5p	2	-7.87
Human	NM_004522	KIF5C	hsa-miR-371-5p	3	-7.83
Human	NM_006888	CALM1	hsa-miR-371-5p	1	-7.83
Human	NM_018708	FEM1A	hsa-miR-371-5p	1	-7.83
Human	NM_012388	PLDN	hsa-miR-371-5p	1	-7.82
Human	NM_020921	NIN	hsa-miR-371-5p	1	-7.82
Human	NM_001002296;NM_016099	GOLGA7	hsa-miR-371-5p	1	-7.81
Human	NM_020466	LYRM2	hsa-miR-371-5p	1	-7.8
Human	NM_003649;NM_004032	DDO	hsa-miR-371-5p	1	-7.79
Human	NM_001038628;NM_003781;NM_033167;NM_033168;NM_033169	B3GALT3	hsa-miR-371-5p	1	-7.78
Human	NM_030782	CLPTM1L	hsa-miR-371-5p	1	-7.78
Human	NM_001014975	CFH	hsa-miR-371-5p	1	-7.77
Human	NM_015092	SMG1	hsa-miR-371-5p	1	-7.77
Human	NM_025230;NM_181357	WDR23	hsa-miR-371-5p	2	-7.77
Human	NM_001079526;NM_016260	IKZF2	hsa-miR-371-5p	2	-7.76
Human	NM_001080392	KIAA1147	hsa-miR-371-5p	2	-7.76
Human	NM_017822	C12orf41	hsa-miR-371-5p	1	-7.75
Human	NM_000808	GABRA3	hsa-miR-371-5p	1	-7.74
Human	NM_001006641;NM_001006642;NM_001006643;NM_052901	SLC25A25	hsa-miR-371-5p	1	-7.74
Human	NM_145273	CD300LG	hsa-miR-371-5p	1	-7.74
Human	NM_000153	GALC	hsa-miR-371-5p	1	-7.73
Human	NM_001079514;NM_016936	UBN1	hsa-miR-371-5p	1	-7.73
Human	NM_014011;NM_144949	SOCS5	hsa-miR-371-5p	2	-7.73
Human	NM_017709	FAM46C	hsa-miR-371-5p	3	-7.73
Human	NM_134431	SLCO1A2	hsa-miR-371-5p	1	-7.73
Human	NM_006806	BTG3	hsa-miR-371-5p	2	-7.72
Human	NM_213662	STAT3	hsa-miR-371-5p	1	-7.72
Human	NM_006054;NM_201428;NM_201429;NM_201430	RTN3	hsa-miR-371-5p	1	-7.71
Human	NM_007174	CIT	hsa-miR-371-5p	1	-7.71
Human	NM_001099733;NM_001117	ADCYAP1	hsa-miR-371-5p	1	-7.7
Human	NM_021020	LZTS1	hsa-miR-371-5p	1	-7.7
Human	NM_000865	HTR1E	hsa-miR-371-5p	1	-7.69
Human	NM_001007559;NM_005637	SS18	hsa-miR-371-5p	1	-7.69
Human	NM_020742;NM_181332	NLGN4X	hsa-miR-371-5p	1	-7.69
Human	NM_001001419;NM_001001420;NM_005903	SMAD5	hsa-miR-371-5p	1	-7.68
Human	NM_007212	RNF2	hsa-miR-371-5p	1	-7.68
Human	NM_014755	SERTAD2	hsa-miR-371-5p	1	-7.68
Human	NM_003966	SEMA5A	hsa-miR-371-5p	1	-7.66
Human	NM_138385	TMEM129	hsa-miR-371-5p	2	-7.66
Human	NM_144770	RBM11	hsa-miR-371-5p	1	-7.66
Human	NM_152906	C22orf25	hsa-miR-371-5p	1	-7.65
Human	NM_017526	LEPROT	hsa-miR-371-5p	1	-7.64
Human	NM_000826;NM_001083619;NM_001083620	GRIA2	hsa-miR-371-5p	2	-7.63
Human	NM_052941	GBP4	hsa-miR-371-5p	1	-7.63
Human	NM_012455	PSD4	hsa-miR-371-5p	1	-7.62
Human	NM_007195	POLI	hsa-miR-371-5p	1	-7.61
Human	NM_001079669;NM_032813	TMTC4	hsa-miR-371-5p	1	-7.6
Human	NM_001695	ATP6V1C1	hsa-miR-371-5p	1	-7.59
Human	NM_005935	AFF1	hsa-miR-371-5p	1	-7.59
Human	NM_014872	ZBTB5	hsa-miR-371-5p	1	-7.56
Human	NM_025248	SNIP	hsa-miR-371-5p	2	-7.55
Human	NM_001099734;NM_032012	C9orf5	hsa-miR-371-5p	1	-7.54
Human	NM_001097633;NM_001097634;NM_001097635;NM_001097636;NM_001490	GCNT1	hsa-miR-371-5p	1	-7.53
Human	NM_001098477;NM_002092	GRSF1	hsa-miR-371-5p	1	-7.53
Human	NM_003774	GALNT4	hsa-miR-371-5p	2	-7.53
Human	NM_017716	MS4A12	hsa-miR-371-5p	1	-7.52
Human	NM_002590;NM_032949	PCDH8	hsa-miR-371-5p	1	-7.51
Human	NM_005156	ROD1	hsa-miR-371-5p	1	-7.51
Human	NM_147180	PPP3R2	hsa-miR-371-5p	1	-7.51
Human	NM_198461	LONRF2	hsa-miR-371-5p	1	-7.51
Human	NM_004501;NM_031844	HNRPU	hsa-miR-371-5p	1	-7.5
Human	NM_006166	NFYB	hsa-miR-371-5p	1	-7.5
Human	NM_015288	PHF15	hsa-miR-371-5p	1	-7.5
Human	NM_198207	LASS1	hsa-miR-371-5p	1	-7.5
Human	NM_015051	TXNDC4	hsa-miR-371-5p	1	-7.49
Human	NM_016206	VGLL3	hsa-miR-371-5p	3	-7.49
Human	NM_000997	RPL37	hsa-miR-371-5p	2	-7.48
Human	NM_017634	KCTD9	hsa-miR-371-5p	1	-7.48
Human	NM_031215	CABLES2	hsa-miR-371-5p	1	-7.48
Human	NM_003178	SYN2	hsa-miR-371-5p	1	-7.47
Human	NM_005373	MPL	hsa-miR-371-5p	1	-7.47
Human	NM_015355	SUZ12	hsa-miR-371-5p	1	-7.47
Human	NM_012297;NM_203504;NM_203505	G3BP2	hsa-miR-371-5p	1	-7.46
Human	NM_015214	DDHD2	hsa-miR-371-5p	1	-7.46
Human	NM_000633	BCL2	hsa-miR-371-5p	1	-7.45
Human	NM_032735;NM_152439	VMD2L3	hsa-miR-371-5p	1	-7.45
Human	NM_001098627;NM_001098628;NM_001098629;NM_001098630;NM_001098631;NM_002200;NM_032643	IRF5	hsa-miR-371-5p	1	-7.44
Human	NM_001017916;NM_001017917;NM_001915	CYB561	hsa-miR-371-5p	2	-7.41
Human	NM_020661	AICDA	hsa-miR-371-5p	1	-7.4
Human	NM_152597	FSIP1	hsa-miR-371-5p	1	-7.4
Human	NM_001008401	ZNF761	hsa-miR-371-5p	1	-7.38
Human	NM_004327;NM_021574	BCR	hsa-miR-371-5p	1	-7.38
Human	NM_153029	N4BP1	hsa-miR-371-5p	1	-7.38
Human	NM_001040697;NM_018314	UEV3	hsa-miR-371-5p	1	-7.36
Human	NM_145014	HYLS1	hsa-miR-371-5p	1	-7.34
Human	NM_020348	CNNM1	hsa-miR-371-5p	1	-7.33
Human	NM_015633	FGFR1OP2	hsa-miR-371-5p	1	-7.32
Human	NM_152374	FLJ38984	hsa-miR-371-5p	1	-7.32
Human	NM_178539	FAM19A2	hsa-miR-371-5p	1	-7.32
Human	NM_001099694	ZNF578	hsa-miR-371-5p	1	-7.31
Human	NM_017849	TMEM127	hsa-miR-371-5p	1	-7.31
Human	NM_145284	LOC159090	hsa-miR-371-5p	1	-7.31
Human	NM_173510	FLJ33814	hsa-miR-371-5p	1	-7.31
Human	NM_005338	HIP1	hsa-miR-371-5p	2	-7.3
Human	NM_001002258;NM_001689	ATP5G3	hsa-miR-371-5p	1	-7.29
Human	NM_001031727;NM_032285	MGC3207	hsa-miR-371-5p	2	-7.29
Human	NM_013375	ABT1	hsa-miR-371-5p	1	-7.29
Human	NM_022037;NM_022173	TIA1	hsa-miR-371-5p	1	-7.29
Human	NM_033083	EAF1	hsa-miR-371-5p	2	-7.29
Human	NM_006606	RBBP9	hsa-miR-371-5p	3	-7.28
Human	NM_004079	CTSS	hsa-miR-371-5p	1	-7.27
Human	NM_001033578;NM_013257;NM_170709	SGK3	hsa-miR-371-5p	1	-7.24
Human	NM_002886	RAP2B	hsa-miR-371-5p	1	-7.24
Human	NM_004797	ADIPOQ	hsa-miR-371-5p	1	-7.23
Human	NM_005715	UST	hsa-miR-371-5p	1	-7.23
Human	NM_032506	KIAA1841	hsa-miR-371-5p	1	-7.23
Human	NM_001039199;NM_024331	C20orf121	hsa-miR-371-5p	2	-7.22
Human	NM_005207	CRKL	hsa-miR-371-5p	1	-7.22
Human	NM_005239	ETS2	hsa-miR-371-5p	1	-7.22
Human	NM_012212	LTB4DH	hsa-miR-371-5p	1	-7.22
Human	NM_001002294;NM_006894	FMO3	hsa-miR-371-5p	1	-7.2
Human	NM_015345	DAAM2	hsa-miR-371-5p	1	-7.2
Human	NM_138492;NM_182960;NM_205846	MGC21644	hsa-miR-371-5p	1	-7.2
Human	NM_000565;NM_181359	IL6R	hsa-miR-371-5p	2	-7.19
Human	NM_017594	DIRAS2	hsa-miR-371-5p	1	-7.19
Human	NM_001427	EN2	hsa-miR-371-5p	1	-7.18
Human	NM_144682	SLFN13	hsa-miR-371-5p	2	-7.18
Human	NM_001025356	TMEM16F	hsa-miR-371-5p	1	-7.17
Human	NM_022371	TOR3A	hsa-miR-371-5p	1	-7.17
Human	NM_207396	RNF207	hsa-miR-371-5p	1	-7.17
Human	NM_007331	WHSC1	hsa-miR-371-5p	1	-7.16
Human	NM_020405	PLXDC1	hsa-miR-371-5p	2	-7.16
Human	NM_001025202	LOC442582	hsa-miR-371-5p	1	-7.15
Human	NM_004523	KIF11	hsa-miR-371-5p	1	-7.15
Human	NM_005658	TRAF1	hsa-miR-371-5p	1	-7.15
Human	NM_001100624	CENPN	hsa-miR-371-5p	1	-7.14
Human	NM_005086	SSPN	hsa-miR-371-5p	1	-7.14
Human	NM_012214	MGAT4A	hsa-miR-371-5p	1	-7.14
Human	NM_052848	MGC20255	hsa-miR-371-5p	1	-7.14
Human	NM_138468	ICA1L	hsa-miR-371-5p	1	-7.14
Human	NM_145312	ZNF485	hsa-miR-371-5p	1	-7.14
Human	NM_001104595;NM_017911	FAM118A	hsa-miR-371-5p	1	-7.13
Human	NM_003274	TMEM1	hsa-miR-371-5p	1	-7.13
Human	NM_005433	YES1	hsa-miR-371-5p	1	-7.13
Human	NM_138554	TLR4	hsa-miR-371-5p	2	-7.12
Human	NM_001080432	FTO	hsa-miR-371-5p	1	-7.11
Human	NM_004843	IL27RA	hsa-miR-371-5p	1	-7.11
Human	NM_016617	UFM1	hsa-miR-371-5p	1	-7.11
Human	NM_032824	TMEM87B	hsa-miR-371-5p	1	-7.11
Human	NM_033358	CASP8	hsa-miR-371-5p	1	-7.11
Human	NM_001009993	LOC130074	hsa-miR-371-5p	1	-7.1
Human	NM_005883	APC2	hsa-miR-371-5p	1	-7.1
Human	NM_001167	BIRC4	hsa-miR-371-5p	1	-7.09
Human	NM_002716	PPP2R1B	hsa-miR-371-5p	1	-7.09
Human	NM_006956;NM_016265	ZNF12	hsa-miR-371-5p	1	-7.08
Human	NM_032174	TOMM40L	hsa-miR-371-5p	1	-7.07
Human	NM_001013739	LOC442578	hsa-miR-371-5p	1	-7.06
Human	NM_058182	C21orf51	hsa-miR-371-5p	1	-7.06
Human	NM_001010883	FAM102B	hsa-miR-371-5p	1	-7.05
Human	NM_001042510;NM_001042511;NM_016096	ZNF706	hsa-miR-371-5p	2	-7.05
Human	NM_012318	LETM1	hsa-miR-371-5p	1	-7.05
Human	NM_030799	YIPF5	hsa-miR-371-5p	1	-7.05
Human	NM_173804	TMEM86B	hsa-miR-371-5p	1	-7.05
Human	NM_022766	CERK	hsa-miR-371-5p	2	-7.04
Human	NM_144578	C14orf32	hsa-miR-371-5p	1	-7.04
Human	NM_021140	UTX	hsa-miR-371-5p	1	-7.03
Human	NM_001001938	C9orf47	hsa-miR-371-5p	1	-7.02
Human	NM_013240;NM_182749	HEMK2	hsa-miR-371-5p	1	-7.02
Human	NM_152624	DCP2	hsa-miR-371-5p	3	-7.02
Human	NM_003203	C2orf3	hsa-miR-371-5p	1	-7
Human	NM_030817	APOLD1	hsa-miR-371-5p	1	-7
Human	NM_013302	EEF2K	hsa-miR-371-5p	2	-6.98
Human	NM_014820	TOMM70A	hsa-miR-371-5p	1	-6.98
Human	NM_138799	OACT2	hsa-miR-371-5p	1	-6.98
Human	NM_182922	FLJ20718	hsa-miR-371-5p	1	-6.98
Human	NM_199342	CCDC23	hsa-miR-371-5p	1	-6.97
Human	NM_012232	PTRF	hsa-miR-371-5p	1	-6.96
Human	NM_017552	ATAD2B	hsa-miR-371-5p	1	-6.95
Human	NM_145207	SPATA5	hsa-miR-371-5p	1	-6.95
Human	NM_001037954;NM_033425	DIXDC1	hsa-miR-371-5p	1	-6.94
Human	NM_001738	CA1	hsa-miR-371-5p	1	-6.92
Human	NM_144618	MGC29891	hsa-miR-371-5p	1	-6.91
Human	NM_006943	SOX12	hsa-miR-371-5p	1	-6.9
Human	NM_001029976;NM_006958	ZNF16	hsa-miR-371-5p	1	-6.88
Human	NM_001080484	KIAA1751	hsa-miR-371-5p	1	-6.88
Human	NM_003772	JRKL	hsa-miR-371-5p	1	-6.88
Human	NM_004302	ACVR1B	hsa-miR-371-5p	1	-6.88
Human	NM_004397	DDX6	hsa-miR-371-5p	1	-6.88
Human	NM_000885	ITGA4	hsa-miR-371-5p	1	-6.87
Human	NM_001039573	SEC14L1	hsa-miR-371-5p	1	-6.87
Human	NM_000533;NM_199478	PLP1	hsa-miR-371-5p	1	-6.86
Human	NM_001017970	TMEM30B	hsa-miR-371-5p	1	-6.86
Human	NM_006060	IKZF1	hsa-miR-371-5p	1	-6.86
Human	NM_144975	SLFN5	hsa-miR-371-5p	1	-6.86
Human	NM_145071	CISH	hsa-miR-371-5p	1	-6.86
Human	NM_178509	STXBP4	hsa-miR-371-5p	1	-6.85
Human	NM_001013703	EIF2AK4	hsa-miR-371-5p	1	-6.84
Human	NM_001024845;NM_006934;NM_201649	SLC6A9	hsa-miR-371-5p	1	-6.84
Human	NM_001040284;NM_001040285	PAPD5	hsa-miR-371-5p	1	-6.84
Human	NM_003211	TDG	hsa-miR-371-5p	1	-6.84
Human	NM_001030001	RPS29	hsa-miR-371-5p	1	-6.83
Human	NM_013255	MKLN1	hsa-miR-371-5p	2	-6.83
Human	NM_015192;NM_182734	PLCB1	hsa-miR-371-5p	1	-6.83
Human	NM_024308	MGC4172	hsa-miR-371-5p	1	-6.83
Human	NM_007033	RER1	hsa-miR-371-5p	1	-6.82
Human	NM_015178	RHOBTB2	hsa-miR-371-5p	1	-6.82
Human	NM_001077241;NM_182556	SLC25A45	hsa-miR-371-5p	1	-6.81
Human	NM_002773	PRSS8	hsa-miR-371-5p	1	-6.8
Human	NM_004718	COX7A2L	hsa-miR-371-5p	1	-6.77
Human	NM_014112	TRPS1	hsa-miR-371-5p	1	-6.77
Human	NM_001098414;NM_198484	ZNF621	hsa-miR-371-5p	2	-6.76
Human	NM_013943	CLIC4	hsa-miR-371-5p	1	-6.76
Human	NM_014687	KIAA0226	hsa-miR-371-5p	1	-6.76
Human	NM_014797	ZBTB24	hsa-miR-371-5p	1	-6.76
Human	NM_003631	PARG	hsa-miR-371-5p	2	-6.75
Human	NM_014548	TMOD2	hsa-miR-371-5p	1	-6.74
Human	NM_015227	POFUT2	hsa-miR-371-5p	1	-6.74
Human	NM_025077	TOE1	hsa-miR-371-5p	1	-6.74
Human	NM_004738	VAPB	hsa-miR-371-5p	1	-6.73
Human	NM_014394	GHITM	hsa-miR-371-5p	1	-6.73
Human	NM_015056	KIAA0179	hsa-miR-371-5p	2	-6.73
Human	NM_197975	BTNL3	hsa-miR-371-5p	1	-6.73
Human	NM_001407	CELSR3	hsa-miR-371-5p	1	-6.72
Human	NM_006134	TMEM50B	hsa-miR-371-5p	2	-6.72
Human	NM_148672	CCL28	hsa-miR-371-5p	1	-6.71
Human	NM_032136	TKTL2	hsa-miR-371-5p	1	-6.69
Human	NM_002977	SCN9A	hsa-miR-371-5p	1	-6.68
Human	NM_173666	DTWD2	hsa-miR-371-5p	1	-6.68
Human	NM_004507	HUS1	hsa-miR-371-5p	1	-6.65
Human	NM_198990	NAPE-PLD	hsa-miR-371-5p	1	-6.65
Human	NM_001079878;NM_001298	CNGA3	hsa-miR-371-5p	1	-6.64
Human	NM_001969;NM_183004	EIF5	hsa-miR-371-5p	1	-6.62
Human	NM_133646	ZAK	hsa-miR-371-5p	1	-6.61
Human	NM_144994	ANKRD23	hsa-miR-371-5p	1	-6.61
Human	NM_181782	NCOA7	hsa-miR-371-5p	1	-6.61
Human	NM_001099221	TIFAB	hsa-miR-371-5p	1	-6.58
Human	NM_020163	SEMA3G	hsa-miR-371-5p	1	-6.58
Human	NM_152458	ZNF785	hsa-miR-371-5p	1	-6.58
Human	NM_153838	GPR115	hsa-miR-371-5p	1	-6.58
Human	NM_006750	SNTB2	hsa-miR-371-5p	1	-6.57
Human	NM_015251	ASCIZ	hsa-miR-371-5p	1	-6.57
Human	NM_000923;NM_001098818;NM_001098819	PDE4C	hsa-miR-371-5p	1	-6.56
Human	NM_001014372	SYT14L	hsa-miR-371-5p	1	-6.56
Human	NM_003016	SFRS2	hsa-miR-371-5p	1	-6.56
Human	NM_006449	CDC42EP3	hsa-miR-371-5p	1	-6.56
Human	NM_001040655;NM_001040656;NM_001040657;NM_001040658;NM_001040659;NM_001040660;NM_022905	TTC23	hsa-miR-371-5p	1	-6.55
Human	NM_006743	RBM3	hsa-miR-371-5p	1	-6.55
Human	NM_020923	ZDBF2	hsa-miR-371-5p	1	-6.55
Human	NM_144590	ANKRD22	hsa-miR-371-5p	2	-6.55
Human	NM_033081	DIDO1	hsa-miR-371-5p	1	-6.54
Human	NM_018945	PDE7B	hsa-miR-371-5p	1	-6.53
Human	NM_021215	C20orf77	hsa-miR-371-5p	1	-6.53
Human	NM_001044305;NM_021940	SMAP1	hsa-miR-371-5p	1	-6.52
Human	NM_175709	CBX7	hsa-miR-371-5p	1	-6.52
Human	NM_014648	DZIP3	hsa-miR-371-5p	1	-6.51
Human	NM_016065	MRPS16	hsa-miR-371-5p	1	-6.5
Human	NM_133371	MYOZ3	hsa-miR-371-5p	1	-6.5
Human	NM_001005476;NM_003628	PKP4	hsa-miR-371-5p	1	-6.48
Human	NM_006996	SLC19A2	hsa-miR-371-5p	1	-6.48
Human	NM_002203	ITGA2	hsa-miR-371-5p	1	-6.47
Human	NM_024106	ZNF426	hsa-miR-371-5p	1	-6.47
Human	NM_031459	SESN2	hsa-miR-371-5p	1	-6.47
Human	NM_017546	C2orf29	hsa-miR-371-5p	1	-6.46
Human	NM_018036	C14orf103	hsa-miR-371-5p	3	-6.45
Human	NM_002819;NM_031990;NM_031991;NM_175847	PTBP1	hsa-miR-371-5p	1	-6.44
Human	NM_002570;NM_138319	PCSK6	hsa-miR-371-5p	1	-6.43
Human	NM_020695	REXO1	hsa-miR-371-5p	1	-6.43
Human	NM_152437	ZNF664	hsa-miR-371-5p	1	-6.43
Human	NM_052978	TRIM9	hsa-miR-371-5p	1	-6.42
Human	NM_003840	TNFRSF10D	hsa-miR-371-5p	2	-6.41
Human	NM_133477	SYNPO2	hsa-miR-371-5p	1	-6.41
Human	NM_001080433	CCDC85A	hsa-miR-371-5p	1	-6.4
Human	NM_001010874	SRD5A2L2	hsa-miR-371-5p	1	-6.39
Human	NM_018157	RIC8B	hsa-miR-371-5p	1	-6.39
Human	NM_015310;NM_206909	PSD3	hsa-miR-371-5p	2	-6.38
Human	NM_005076	CNTN2	hsa-miR-371-5p	1	-6.37
Human	NM_181724	TMEM119	hsa-miR-371-5p	1	-6.37
Human	NM_001099339;NM_053041	COMMD7	hsa-miR-371-5p	1	-6.36
Human	NM_003373;NM_014000	VCL	hsa-miR-371-5p	1	-6.35
Human	NM_182540	DDX26B	hsa-miR-371-5p	1	-6.34
Human	NM_201280	MUTED	hsa-miR-371-5p	1	-6.34
Human	NM_001040409;NM_006636	MTHFD2	hsa-miR-371-5p	1	-6.33
Human	NM_006544	EXOC5	hsa-miR-371-5p	2	-6.33
Human	NM_015147	CEP68	hsa-miR-371-5p	1	-6.33
Human	NM_080618	CTCFL	hsa-miR-371-5p	1	-6.33
Human	NM_012072	CD93	hsa-miR-371-5p	1	-6.31
Human	NM_182920	ADAMTS9	hsa-miR-371-5p	1	-6.31
Human	NM_002816	PSMD12	hsa-miR-371-5p	1	-6.3
Human	NM_014444	76P	hsa-miR-371-5p	1	-6.3
Human	NM_022895	C12orf43	hsa-miR-371-5p	1	-6.29
Human	NM_031272;NM_198393	TEX14	hsa-miR-371-5p	1	-6.29
Human	NM_022091	ASCC3	hsa-miR-371-5p	1	-6.28
Human	NM_002775	HTRA1	hsa-miR-371-5p	1	-6.27
Human	NM_021979	HSPA2	hsa-miR-371-5p	1	-6.27
Human	NM_152682	RWDD4A	hsa-miR-371-5p	1	-6.26
Human	NM_006738;NM_007200;NM_144767	AKAP13	hsa-miR-371-5p	1	-6.24
Human	NM_015114	KIAA0692	hsa-miR-371-5p	1	-6.24
Human	NM_024963	FBXL18	hsa-miR-371-5p	2	-6.23
Human	NM_001040185	LOC91661	hsa-miR-371-5p	1	-6.22
Human	NM_001010888	ZC3H12B	hsa-miR-371-5p	1	-6.19
Human	NM_001031684	SFRS7	hsa-miR-371-5p	1	-6.18
Human	NM_003644;NM_201432;NM_201433	GAS7	hsa-miR-371-5p	1	-6.16
Human	NM_003262	TLOC1	hsa-miR-371-5p	2	-6.14
Human	NM_017925	DENND4C	hsa-miR-371-5p	1	-6.14
Human	NM_001031683;NM_001549	IFIT3	hsa-miR-371-5p	1	-6.13
Human	NM_002268	KPNA4	hsa-miR-371-5p	1	-6.13
Human	NM_005810	KLRG1	hsa-miR-371-5p	1	-6.13
Human	NM_001100399;NM_015200	PDS5A	hsa-miR-371-5p	1	-6.12
Human	NM_181706	ZCSL3	hsa-miR-371-5p	1	-6.11
Human	NM_012425;NM_152724	RSU1	hsa-miR-371-5p	1	-6.1
Human	NM_015046	SETX	hsa-miR-371-5p	1	-6.1
Human	NM_203349	SHC4	hsa-miR-371-5p	1	-6.1
Human	NM_012408;NM_183047;NM_183048	PRKCBP1	hsa-miR-371-5p	1	-6.09
Human	NM_022074;NM_198847	FAM111A	hsa-miR-371-5p	1	-6.09
Human	NM_018374	TMEM106B	hsa-miR-371-5p	2	-6.07
Human	NM_001042599;NM_005235	ERBB4	hsa-miR-371-5p	1	-6.06
Human	NM_016257	HPCAL4	hsa-miR-371-5p	1	-6.06
Human	NM_006885	ATBF1	hsa-miR-371-5p	1	-6.05
Human	NM_015509	NECAP1	hsa-miR-371-5p	1	-6.05
Human	NM_005822	DSCR1L1	hsa-miR-371-5p	1	-6.04
Human	NM_001040875;NM_018972	GDAP1	hsa-miR-371-5p	1	-6.03
Human	NM_032485;NM_182802	MCM8	hsa-miR-371-5p	1	-6.03
Human	NM_001005915	ERBB3	hsa-miR-371-5p	1	-6.01
Human	NM_018121	C10orf6	hsa-miR-371-5p	1	-6.01
Human	NM_021218	C9orf80	hsa-miR-371-5p	1	-6.01
Human	NM_152641	ARID2	hsa-miR-371-5p	1	-6
Human	NM_181644	MFSD4	hsa-miR-371-5p	1	-6
Human	NM_207672	GRIPAP1	hsa-miR-371-5p	1	-6
Human	NM_001024216;NM_017556	FBLIM1	hsa-miR-371-5p	2	-5.99
Human	NM_001102575	SNAG1	hsa-miR-371-5p	1	-5.98
Human	NM_007153	ZNF208	hsa-miR-371-5p	1	-5.98
Human	NM_002336	LRP6	hsa-miR-371-5p	1	-5.97
Human	NM_030641	APOL6	hsa-miR-371-5p	1	-5.97
Human	NM_001012957;NM_018662	DISC1	hsa-miR-371-5p	1	-5.96
Human	NM_022648	TNS1	hsa-miR-371-5p	1	-5.96
Human	NM_015691	WWC3	hsa-miR-371-5p	1	-5.95
Human	NM_001100590;NM_014743	KIAA0232	hsa-miR-371-5p	1	-5.92
Human	NM_021964	ZNF148	hsa-miR-371-5p	1	-5.92
Human	NM_018373	SYNJ2BP	hsa-miR-371-5p	2	-5.91
Human	NM_032268	ZNRF1	hsa-miR-371-5p	2	-5.91
Human	NM_018940	PCDHB7	hsa-miR-371-5p	1	-5.9
Human	NM_001076778;NM_007177	FAM107A	hsa-miR-371-5p	1	-5.89
Human	NM_014737;NM_170774	RASSF2	hsa-miR-371-5p	1	-5.89
Human	NM_001080973;NM_017563	IL17RD	hsa-miR-371-5p	1	-5.88
Human	NM_003643	GCM1	hsa-miR-371-5p	1	-5.88
Human	NM_020802	KIAA1377	hsa-miR-371-5p	2	-5.88
Human	NM_173569	FLJ25778	hsa-miR-371-5p	2	-5.87
Human	NM_001010846	SHE	hsa-miR-371-5p	2	-5.86
Human	NM_032109	OTP	hsa-miR-371-5p	1	-5.86
Human	NM_032199	ARID5B	hsa-miR-371-5p	1	-5.86
Human	NM_013283;NM_182796	MAT2B	hsa-miR-371-5p	1	-5.85
Human	NM_024081	PRRG4	hsa-miR-371-5p	1	-5.85
Human	NM_005023	PGGT1B	hsa-miR-371-5p	1	-5.84
Human	NM_178831	GATS	hsa-miR-371-5p	1	-5.84
Human	NM_001098832;NM_032837	FAM104A	hsa-miR-371-5p	2	-5.83
Human	NM_173825	RABL3	hsa-miR-371-5p	2	-5.82
Human	NM_139072	DNER	hsa-miR-371-5p	1	-5.81
Human	NM_001080398	KIAA0368	hsa-miR-371-5p	1	-5.8
Human	NM_006161	NEUROG1	hsa-miR-371-5p	1	-5.8
Human	NM_004788	UBE4A	hsa-miR-371-5p	1	-5.79
Human	NM_021101	CLDN1	hsa-miR-371-5p	1	-5.78
Human	NM_005923	MAP3K5	hsa-miR-371-5p	1	-5.77
Human	NM_016083;NM_033181	CNR1	hsa-miR-371-5p	1	-5.77
Human	NM_000947	PRIM2A	hsa-miR-371-5p	1	-5.74
Human	NM_001002844	SUHW4	hsa-miR-371-5p	1	-5.74
Human	NM_021167	GATAD1	hsa-miR-371-5p	1	-5.74
Human	NM_138444	KCTD12	hsa-miR-371-5p	1	-5.74
Human	NM_003640	IKBKAP	hsa-miR-371-5p	1	-5.73
Human	NM_001007224;NM_024711	GIMAP6	hsa-miR-371-5p	1	-5.72
Human	NM_001040441	ZBTB8	hsa-miR-371-5p	1	-5.71
Human	NM_001042552;NM_001042553	TATDN3	hsa-miR-371-5p	1	-5.7
Human	NM_018159	NUDT11	hsa-miR-371-5p	2	-5.7
Human	NM_023015	INTS3	hsa-miR-371-5p	1	-5.7
Human	NM_198074	OR2C3	hsa-miR-371-5p	1	-5.7
Human	NM_014643	ZNF516	hsa-miR-371-5p	1	-5.69
Human	NM_020375	C12orf5	hsa-miR-371-5p	2	-5.69
Human	NM_021012	KCNJ12	hsa-miR-371-5p	2	-5.69
Human	NM_198460	GBP6	hsa-miR-371-5p	1	-5.69
Human	NM_001024847;NM_003242	TGFBR2	hsa-miR-371-5p	1	-5.67
Human	NM_002498;NM_152720	NEK3	hsa-miR-371-5p	1	-5.67
Human	NM_019119	PCDHB9	hsa-miR-371-5p	1	-5.67
Human	NM_014974	DIP2C	hsa-miR-371-5p	1	-5.66
Human	NM_001001132	ITSN1	hsa-miR-371-5p	1	-5.65
Human	NM_001083947;NM_019894	TMPRSS4	hsa-miR-371-5p	1	-5.65
Human	NM_001304	CPD	hsa-miR-371-5p	1	-5.65
Human	NM_021187	CYP4F11	hsa-miR-371-5p	1	-5.65
Human	NM_145165	CHURC1	hsa-miR-371-5p	1	-5.65
Human	NM_001033087;NM_080676	C20orf133	hsa-miR-371-5p	1	-5.64
Human	NM_001982	ERBB3	hsa-miR-371-5p	1	-5.64
Human	NM_005540	INPP5B	hsa-miR-371-5p	1	-5.64
Human	NM_001001396;NM_001684	ATP2B4	hsa-miR-371-5p	1	-5.63
Human	NM_001048201;NM_013282	UHRF1	hsa-miR-371-5p	1	-5.63
Human	NM_001081461	PTDSR	hsa-miR-371-5p	1	-5.63
Human	NM_020960	GPR107	hsa-miR-371-5p	1	-5.63
Human	NM_145037	FAM55C	hsa-miR-371-5p	1	-5.63
Human	NM_014904	RAB11FIP2	hsa-miR-371-5p	1	-5.62
Human	NM_001040436	YARS2	hsa-miR-371-5p	1	-5.6
Human	NM_005198	CHKB	hsa-miR-371-5p	1	-5.6
Human	NM_024052	C17orf39	hsa-miR-371-5p	2	-5.6
Human	NM_152253	CHKB	hsa-miR-371-5p	2	-5.6
Human	NM_001981	EPS15	hsa-miR-371-5p	1	-5.59
Human	NM_005668	ST8SIA4	hsa-miR-371-5p	1	-5.57
Human	NM_018057	SLC6A15	hsa-miR-371-5p	1	-5.57
Human	NM_001001665	FLJ16008	hsa-miR-371-5p	3	-5.56
Human	NM_020910	KIAA1549	hsa-miR-371-5p	1	-5.56
Human	NM_024345	WDR32	hsa-miR-371-5p	2	-5.56
Human	NM_024918	C20orf172	hsa-miR-371-5p	1	-5.56
Human	NM_032831	C7orf19	hsa-miR-371-5p	1	-5.56
Human	NM_181783	TMTC3	hsa-miR-371-5p	1	-5.56
Human	NM_001039844	ACBD7	hsa-miR-371-5p	1	-5.55
Human	NM_014909	VASH1	hsa-miR-371-5p	1	-5.55
Human	NM_024590	ARSJ	hsa-miR-371-5p	1	-5.55
Human	NM_138348	FAM105B	hsa-miR-371-5p	1	-5.55
Human	NM_175924	ILDR1	hsa-miR-371-5p	1	-5.55
Human	NM_006465	ARID3B	hsa-miR-371-5p	1	-5.54
Human	NM_014875	KIF14	hsa-miR-371-5p	1	-5.54
Human	NM_001381	DOK1	hsa-miR-371-5p	1	-5.53
Human	NM_173494	CXorf41	hsa-miR-371-5p	1	-5.53
Human	NM_199046;NM_199456	TEPP	hsa-miR-371-5p	1	-5.52
Human	NM_001007553;NM_007158	CSDE1	hsa-miR-371-5p	1	-5.51
Human	NM_018042	SLFN12	hsa-miR-371-5p	1	-5.51
Human	NM_006194	PAX9	hsa-miR-371-5p	1	-5.5
Human	NM_016433	GLTP	hsa-miR-371-5p	2	-5.5
Human	NM_139283	PPTC7	hsa-miR-371-5p	1	-5.5
Human	NM_181491	SURF5	hsa-miR-371-5p	1	-5.5
Human	NM_001025105;NM_001892	CSNK1A1	hsa-miR-371-5p	1	-5.48
Human	NM_153365	TAPT1	hsa-miR-371-5p	1	-5.48
Human	NM_198562	C3orf62	hsa-miR-371-5p	1	-5.48
Human	NM_001098504;NM_001098505;NM_006386;NM_030881	DDX17	hsa-miR-371-5p	1	-5.47
Human	NM_012279	ZNF346	hsa-miR-371-5p	1	-5.47
Human	NM_004612	TGFBR1	hsa-miR-371-5p	1	-5.45
Human	NM_016169	SUFU	hsa-miR-371-5p	1	-5.45
Human	NM_030571	NDFIP1	hsa-miR-371-5p	1	-5.45
Human	NM_020917	KIAA1559	hsa-miR-371-5p	1	-5.44
Human	NM_152551	C6orf151	hsa-miR-371-5p	1	-5.44
Human	NM_152771	C19orf34	hsa-miR-371-5p	1	-5.44
Human	NM_000157;NM_001005741;NM_001005742;NM_001005749;NM_001005750	GBA	hsa-miR-371-5p	1	-5.43
Human	NM_005981	TSPAN31	hsa-miR-371-5p	2	-5.43
Human	NM_002099	GYPA	hsa-miR-371-5p	1	-5.42
Human	NM_006186;NM_173171;NM_173172;NM_173173	NR4A2	hsa-miR-371-5p	1	-5.42
Human	NM_182527	CABP7	hsa-miR-371-5p	1	-5.42
Human	NM_000268;NM_016418;NM_181828;NM_181829;NM_181830;NM_181832;NM_181833	NF2	hsa-miR-371-5p	1	-5.41
Human	NM_001099436	ULK3	hsa-miR-371-5p	1	-5.41
Human	NM_015506	MMACHC	hsa-miR-371-5p	1	-5.41
Human	NM_000128	F11	hsa-miR-371-5p	1	-5.4
Human	NM_001005354;NM_018457	PRR13	hsa-miR-371-5p	1	-5.4
Human	NM_001040429	PCDH17	hsa-miR-371-5p	2	-5.39
Human	NM_018124	RFWD3	hsa-miR-371-5p	1	-5.39
Human	NM_002398	MEIS1	hsa-miR-371-5p	1	-5.38
Human	NM_001080383;NM_005497	GJA7	hsa-miR-371-5p	1	-5.37
Human	NM_022048	CSNK1G1	hsa-miR-371-5p	1	-5.37
Human	NM_014903	NAV3	hsa-miR-371-5p	1	-5.36
Human	NM_001079846;NM_004380	CREBBP	hsa-miR-371-5p	1	-5.34
Human	NM_017523;NM_199139	BIRC4BP	hsa-miR-371-5p	1	-5.34
Human	NM_032861	SERAC1	hsa-miR-371-5p	1	-5.33
Human	NM_001616	ACVR2A	hsa-miR-371-5p	1	-5.32
Human	NM_003748	ALDH4A1	hsa-miR-371-5p	1	-5.32
Human	NM_002806	PSMC6	hsa-miR-371-5p	1	-5.3
Human	NM_016101	NIP7	hsa-miR-371-5p	1	-5.3
Human	NM_198445	FLJ45909	hsa-miR-371-5p	1	-5.3
Human	NM_001713	BHMT	hsa-miR-371-5p	1	-5.29
Human	NM_031442	TMEM47	hsa-miR-371-5p	1	-5.29
Human	NM_182687	PKMYT1	hsa-miR-371-5p	1	-5.27
Human	NM_001100108;NM_005158;NM_007314	ABL2	hsa-miR-371-5p	1	-5.24
Human	NM_007172;NM_153645	NUP50	hsa-miR-371-5p	1	-5.24
Human	NM_014848	SV2B	hsa-miR-371-5p	2	-5.24
Human	NM_020340	KIAA1244	hsa-miR-371-5p	1	-5.24
Human	NM_001079519;NM_173607	C14orf24	hsa-miR-371-5p	1	-5.23
Human	NM_001087	AAMP	hsa-miR-371-5p	1	-5.2
Human	NM_021151	CROT	hsa-miR-371-5p	1	-5.19
Human	NM_033549	TRIM41	hsa-miR-371-5p	1	-5.19
Human	NM_182969	XRRA1	hsa-miR-371-5p	1	-5.19
Human	NM_004077;NM_198324	CS	hsa-miR-371-5p	1	-5.18
Human	NM_020208;NM_022405	SLC6A20	hsa-miR-371-5p	1	-5.18
Human	NM_000450	SELE	hsa-miR-371-5p	1	-5.17
Human	NM_002412	MGMT	hsa-miR-371-5p	1	-5.15
Human	NM_002569	FURIN	hsa-miR-371-5p	1	-5.15
Human	NM_152613	MGC26816	hsa-miR-371-5p	1	-5.15
Human	NM_014949	KIAA0907	hsa-miR-371-5p	1	-5.14
Human	NM_024666	FLJ11506	hsa-miR-371-5p	1	-5.14
Human	NM_032228	MLSTD2	hsa-miR-371-5p	1	-5.14
Human	NM_021648	TSPYL4	hsa-miR-371-5p	1	-5.13
Human	NM_014393	STAU2	hsa-miR-371-5p	1	-5.12
Human	NM_153705	KDELC2	hsa-miR-371-5p	2	-5.11
Human	NM_004281	BAG3	hsa-miR-371-5p	1	-5.09
Human	NM_015057	MYCBP2	hsa-miR-371-5p	1	-5.09
Human	NM_020962	NOPE	hsa-miR-371-5p	1	-5.09
Human	NM_013995	LAMP2	hsa-miR-371-5p	1	-5.07
Human	NM_017638	MED18	hsa-miR-371-5p	1	-5.07
Human	NM_001083585;NM_004703	RABEP1	hsa-miR-371-5p	1	-5.06
Human	NM_002657	PLAGL2	hsa-miR-371-5p	1	-5.06
Human	NM_025113	C13orf18	hsa-miR-371-5p	1	-5.06
Human	NM_003869;NM_198061	CES2	hsa-miR-371-5p	2	-5.04
Human	NM_021938	BRUNOL5	hsa-miR-371-5p	1	-5.04
Human	NM_032151	PCBD2	hsa-miR-371-5p	1	-5.03
Human	NM_005378	MYCN	hsa-miR-371-5p	1	-5.02
Human	NM_017759	FLJ20309	hsa-miR-371-5p	1	-5.01
Human	NM_022045	MTBP	hsa-miR-371-5p	1	-5.01
Human	NM_138771	LOC90693	hsa-miR-371-5p	1	-5.01
Human	NM_147189	C8orf72	hsa-miR-371-5p	1	-5
Human	NM_207428	C11orf55	hsa-miR-371-5p	1	-5
Human	NM_016297	PCYOX1	hsa-miR-371-5p	1	-4.99
Human	NM_000861;NM_001098211;NM_001098212;NM_001098213	HRH1	hsa-miR-371-5p	1	-4.97
Human	NM_001008710;NM_001008711;NM_006867	RBPMS	hsa-miR-371-5p	1	-4.97
Human	NM_005880	DNAJA2	hsa-miR-371-5p	1	-4.97
Human	NM_021615	CHST6	hsa-miR-371-5p	2	-4.95
Human	NM_001033659	FLJ35848	hsa-miR-371-5p	1	-4.94
Human	NM_133463	AMZ1	hsa-miR-371-5p	1	-4.93
Human	NM_001033553;NM_001033555	SPECC1	hsa-miR-371-5p	1	-4.92
Human	NM_001099267	C6orf98	hsa-miR-371-5p	1	-4.92
Human	NM_006995;NM_181531	BTN2A2	hsa-miR-371-5p	1	-4.92
Human	NM_033064	ATCAY	hsa-miR-371-5p	2	-4.92
Human	NM_152581	MOSPD2	hsa-miR-371-5p	1	-4.92
Human	NM_003930	SCAP2	hsa-miR-371-5p	1	-4.91
Human	NM_020459	PAIP2B	hsa-miR-371-5p	1	-4.91
Human	NM_001007466;NM_020245	TULP4	hsa-miR-371-5p	1	-4.9
Human	NM_001009571;NM_017954	CADPS2	hsa-miR-371-5p	1	-4.9
Human	NM_001018055;NM_024332	CXorf53	hsa-miR-371-5p	1	-4.9
Human	NM_004774	MED1	hsa-miR-371-5p	2	-4.88
Human	NM_207333	ZNF320	hsa-miR-371-5p	2	-4.88
Human	NM_018683	ZNF313	hsa-miR-371-5p	1	-4.87
Human	NM_207111;NM_207116	TRIAD3	hsa-miR-371-5p	1	-4.87
Human	NM_004823	KCNK6	hsa-miR-371-5p	2	-4.86
Human	NM_080743	SRrp35	hsa-miR-371-5p	2	-4.86
Human	NM_003152	STAT5A	hsa-miR-371-5p	1	-4.85
Human	NM_005574	LMO2	hsa-miR-371-5p	1	-4.85
Human	NM_006682	FGL2	hsa-miR-371-5p	1	-4.85
Human	NM_018017	C10orf118	hsa-miR-371-5p	1	-4.85
Human	NM_052845	MMAB	hsa-miR-371-5p	1	-4.84
Human	NM_170707;NM_170708	LMNA	hsa-miR-371-5p	1	-4.84
Human	NM_014647	LKAP	hsa-miR-371-5p	1	-4.83
Human	NM_014670	BZW1	hsa-miR-371-5p	1	-4.83
Human	NM_022824	FBXL17	hsa-miR-371-5p	1	-4.83
Human	NM_000991	RPL28	hsa-miR-371-5p	1	-4.82
Human	NM_006836	GCN1L1	hsa-miR-371-5p	1	-4.82
Human	NM_020914	C17orf27	hsa-miR-371-5p	1	-4.81
Human	NM_021090;NM_153050;NM_153051	MTMR3	hsa-miR-371-5p	1	-4.81
Human	NM_004675	DIRAS3	hsa-miR-371-5p	1	-4.8
Human	NM_007113	TCHH	hsa-miR-371-5p	1	-4.78
Human	NM_001826	CKS1B	hsa-miR-371-5p	1	-4.75
Human	NM_012347;NM_033480;NM_033481	FBXO9	hsa-miR-371-5p	1	-4.75
Human	NM_003747	TNKS	hsa-miR-371-5p	1	-4.74
Human	NM_014776;NM_057169;NM_057170	GIT2	hsa-miR-371-5p	1	-4.74
Human	NM_032582	USP32	hsa-miR-371-5p	1	-4.74
Human	NM_001033925;NM_003252	TIAL1	hsa-miR-371-5p	1	-4.73
Human	NM_144684	ZNF480	hsa-miR-371-5p	1	-4.73
Human	NM_000098	CPT2	hsa-miR-371-5p	1	-4.72
Human	NM_014252	SLC25A15	hsa-miR-371-5p	1	-4.72
Human	NM_001083537	FAM86B1	hsa-miR-371-5p	1	-4.7
Human	NM_001455;NM_201559	FOXO3	hsa-miR-371-5p	1	-4.69
Human	NM_000439	PCSK1	hsa-miR-371-5p	1	-4.68
Human	NM_144615	MGC23244	hsa-miR-371-5p	1	-4.68
Human	NM_003913	PRPF4B	hsa-miR-371-5p	1	-4.67
Human	NM_024565	CCNJL	hsa-miR-371-5p	1	-4.67
Human	NM_144963	FAM91A1	hsa-miR-371-5p	1	-4.67
Human	NM_005643	TAF11	hsa-miR-371-5p	1	-4.66
Human	NM_006241	PPP1R2	hsa-miR-371-5p	1	-4.66
Human	NM_023927	GRAMD3	hsa-miR-371-5p	1	-4.66
Human	NM_003677	DENR	hsa-miR-371-5p	1	-4.65
Human	NM_004367;NM_031409	CCR6	hsa-miR-371-5p	1	-4.65
Human	NM_004707	ATG12	hsa-miR-371-5p	1	-4.64
Human	NM_015011	MYR8	hsa-miR-371-5p	1	-4.63
Human	NM_020925	CACHD1	hsa-miR-371-5p	1	-4.63
Human	NM_133329;NM_172344	KCNG3	hsa-miR-371-5p	1	-4.62
Human	NM_144997	FLCN	hsa-miR-371-5p	1	-4.62
Human	NM_006067	COX4NB	hsa-miR-371-5p	1	-4.61
Human	NM_001080417	ZNF629	hsa-miR-371-5p	1	-4.6
Human	NM_021191	NEUROD4	hsa-miR-371-5p	1	-4.58
Human	NM_001034841	LOC162073	hsa-miR-371-5p	1	-4.56
Human	NM_001042399;NM_016122	CCDC41	hsa-miR-371-5p	1	-4.55
Human	NM_031886	KCNA7	hsa-miR-371-5p	1	-4.55
Human	NM_001098801;NM_152352	C18orf19	hsa-miR-371-5p	2	-4.54
Human	NM_001626	AKT2	hsa-miR-371-5p	1	-4.54
Human	NM_152753	SCUBE3	hsa-miR-371-5p	1	-4.54
Human	NM_182503	DEADC1	hsa-miR-371-5p	1	-4.52
Human	NM_022842	CDCP1	hsa-miR-371-5p	1	-4.51
Human	NM_001017980	LOC203547	hsa-miR-371-5p	1	-4.5
Human	NM_018304	PRR11	hsa-miR-371-5p	1	-4.5
Human	NM_001102445;NM_005613	RGS4	hsa-miR-371-5p	1	-4.47
Human	NM_007238;NM_183397	PXMP4	hsa-miR-371-5p	1	-4.47
Human	NM_017424;NM_177405	CECR1	hsa-miR-371-5p	1	-4.46
Human	NM_144571	CNOT6L	hsa-miR-371-5p	1	-4.45
Human	NM_001101327	LOC145845	hsa-miR-371-5p	1	-4.44
Human	NM_002553	ORC5L	hsa-miR-371-5p	1	-4.44
Human	NM_024836	ZNF672	hsa-miR-371-5p	1	-4.44
Human	NM_003246	THBS1	hsa-miR-371-5p	1	-4.43
Human	NM_015346	ZFYVE26	hsa-miR-371-5p	1	-4.43
Human	NM_032856	WDR73	hsa-miR-371-5p	1	-4.43
Human	NM_174977	SEC14L4	hsa-miR-371-5p	1	-4.43
Human	NM_005868	BET1	hsa-miR-371-5p	1	-4.42
Human	NM_007077	AP4S1	hsa-miR-371-5p	1	-4.41
Human	NM_015074	KIF1B	hsa-miR-371-5p	1	-4.41
Human	NM_005839	SRRM1	hsa-miR-371-5p	1	-4.39
Human	NM_021804	ACE2	hsa-miR-371-5p	1	-4.39
Human	NM_003196	TCEA3	hsa-miR-371-5p	1	-4.38
Human	NM_016562	TLR7	hsa-miR-371-5p	1	-4.38
Human	NM_005331	HBQ1	hsa-miR-371-5p	1	-4.37
Human	NM_012316	KPNA6	hsa-miR-371-5p	2	-4.37
Human	NM_003666	BLZF1	hsa-miR-371-5p	1	-4.35
Human	NM_006079	CITED2	hsa-miR-371-5p	1	-4.35
Human	NM_032302	MGC10911	hsa-miR-371-5p	1	-4.34
Human	NM_001003681;NM_005487;NM_014250	HMG2L1	hsa-miR-371-5p	1	-4.33
Human	NM_001098500;NM_001098501;NM_019590	KIAA1217	hsa-miR-371-5p	1	-4.33
Human	NM_001098516;NM_152673	MUC20	hsa-miR-371-5p	1	-4.32
Human	NM_002108	HAL	hsa-miR-371-5p	1	-4.31
Human	NM_006495	EVI2B	hsa-miR-371-5p	1	-4.31
Human	NM_019035	PCDH18	hsa-miR-371-5p	1	-4.31
Human	NM_024825	FLJ23447	hsa-miR-371-5p	2	-4.31
Human	NM_003161	RPS6KB1	hsa-miR-371-5p	1	-4.3
Human	NM_015500;NM_199050	C21orf25	hsa-miR-371-5p	1	-4.3
Human	NM_022497	MRPS25	hsa-miR-371-5p	1	-4.3
Human	NM_001008220;NM_006650	CPLX2	hsa-miR-371-5p	1	-4.29
Human	NM_001040274	LOC221711	hsa-miR-371-5p	1	-4.29
Human	NM_001007246	BRWD1	hsa-miR-371-5p	1	-4.28
Human	NM_002111	HD	hsa-miR-371-5p	1	-4.28
Human	NM_001937	DPT	hsa-miR-371-5p	1	-4.27
Human	NM_014240	LIMD1	hsa-miR-371-5p	1	-4.26
Human	NM_014805	EPM2AIP1	hsa-miR-371-5p	2	-4.26
Human	NM_001363	DKC1	hsa-miR-371-5p	1	-4.24
Human	NM_014959	CARD8	hsa-miR-371-5p	1	-4.23
Human	NM_015375;NM_199462	RIPK5	hsa-miR-371-5p	1	-4.23
Human	NM_002246	KCNK3	hsa-miR-371-5p	1	-4.22
Human	NM_001031679;NM_198080	MSRB3	hsa-miR-371-5p	1	-4.19
Human	NM_003482	MLL2	hsa-miR-371-5p	1	-4.19
Human	NM_018023	YEATS2	hsa-miR-371-5p	1	-4.18
Human	NM_005795	CALCRL	hsa-miR-371-5p	1	-4.15
Human	NM_001102653;NM_199324	OTUD4	hsa-miR-371-5p	1	-4.14
Human	NM_000382;NM_001031806	ALDH3A2	hsa-miR-371-5p	1	-4.13
Human	NM_001002926	TWISTNB	hsa-miR-371-5p	1	-4.13
Human	NM_031934	RAB34	hsa-miR-371-5p	1	-4.13
Human	NM_030953	TIGD6	hsa-miR-371-5p	1	-4.12
Human	NM_014423	AFF4	hsa-miR-371-5p	1	-4.11
Human	NM_152445	C14orf44	hsa-miR-371-5p	2	-4.11
Human	NM_002500	NEUROD1	hsa-miR-371-5p	1	-4.1
Human	NM_002499	NEO1	hsa-miR-371-5p	1	-4.09
Human	NM_024947	PHC3	hsa-miR-371-5p	1	-4.09
Human	NM_000909	NPY1R	hsa-miR-371-5p	1	-4.08
Human	NM_025222	TMEM113	hsa-miR-371-5p	2	-4.08
Human	NM_080610	CST9L	hsa-miR-371-5p	1	-4.07
Human	NM_181712	ANKRD38	hsa-miR-371-5p	1	-4.07
Human	NM_000408;NM_001083112	GPD2	hsa-miR-371-5p	1	-4.06
Human	NM_152793	C7orf41	hsa-miR-371-5p	1	-4.06
Human	NM_012069	ATP1B4	hsa-miR-371-5p	1	-4.05
Human	NM_030627	CPEB4	hsa-miR-371-5p	1	-4.04
Human	NM_032452	JPH4	hsa-miR-371-5p	1	-4.04
Human	NM_198459	DENND2C	hsa-miR-371-5p	2	-4.04
Human	NM_003551	NME5	hsa-miR-371-5p	1	-4.02
Human	NM_198849	LOC283514	hsa-miR-371-5p	1	-4.01
Human	NM_003029	SHC1	hsa-miR-371-5p	1	-4
Human	NM_006256	PKN2	hsa-miR-371-5p	1	-4
Human	NM_024504	PRDM14	hsa-miR-371-5p	1	-4
Human	NM_000209	PDX1	hsa-miR-371-5p	1	-3.99
Human	NM_013252	CLEC5A	hsa-miR-371-5p	1	-3.99
Human	NM_032494	ZC3H8	hsa-miR-371-5p	1	-3.99
Human	NM_021110	COL14A1	hsa-miR-371-5p	2	-3.98
Human	NM_003655	CBX4	hsa-miR-371-5p	1	-3.97
Human	NM_018294	CWF19L1	hsa-miR-371-5p	1	-3.97
Human	NM_002389;NM_153826;NM_172350;NM_172351;NM_172352;NM_172353;NM_172354;NM_172355;NM_172356;NM_172357;NM_172358;NM_172359;NM_172360;NM_172361	CD46	hsa-miR-371-5p	1	-3.96
Human	NM_018409	LRP2BP	hsa-miR-371-5p	2	-3.95
Human	NM_000621	HTR2A	hsa-miR-371-5p	1	-3.94
Human	NM_018657	MYNN	hsa-miR-371-5p	1	-3.92
Human	NM_020883	ZSWIM5	hsa-miR-371-5p	1	-3.92
Human	NM_004804	WDR39	hsa-miR-371-5p	1	-3.9
Human	NM_181504;NM_181523;NM_181524	PIK3R1	hsa-miR-371-5p	1	-3.89
Human	NM_006646	WASF3	hsa-miR-371-5p	1	-3.88
Human	NM_007006	NUDT21	hsa-miR-371-5p	1	-3.88
Human	NM_005692	ABCF2	hsa-miR-371-5p	1	-3.87
Human	NM_020378	KLP1	hsa-miR-371-5p	1	-3.87
Human	NM_001010924	C10orf38	hsa-miR-371-5p	1	-3.86
Human	NM_003011	SET	hsa-miR-371-5p	1	-3.86
Human	NM_001856	COL16A1	hsa-miR-371-5p	1	-3.85
Human	NM_014741	KIAA0652	hsa-miR-371-5p	1	-3.85
Human	NM_018134	IQCC	hsa-miR-371-5p	1	-3.85
Human	NM_016643	ZNF771	hsa-miR-371-5p	1	-3.82
Human	NM_017692;NM_175069;NM_175071;NM_175072;NM_175073	APTX	hsa-miR-371-5p	1	-3.82
Human	NM_023107;NM_023108	FGFR1	hsa-miR-371-5p	1	-3.82
Human	NM_024700	SNIP1	hsa-miR-371-5p	1	-3.82
Human	NM_000246	CIITA	hsa-miR-371-5p	1	-3.81
Human	NM_173562	C6orf69	hsa-miR-371-5p	1	-3.81
Human	NM_001008657	TCOF1	hsa-miR-371-5p	1	-3.8
Human	NM_017631	FLJ20035	hsa-miR-371-5p	1	-3.8
Human	NM_198279	CXorf23	hsa-miR-371-5p	1	-3.8
Human	NM_001102420;NM_001102421;NM_006007	ZFAND5	hsa-miR-371-5p	1	-3.79
Human	NM_021982	SEC24A	hsa-miR-371-5p	1	-3.78
Human	NM_173582	PGM2L1	hsa-miR-371-5p	1	-3.78
Human	NM_006080	SEMA3A	hsa-miR-371-5p	1	-3.76
Human	NM_007011;NM_152924	ABHD2	hsa-miR-371-5p	1	-3.76
Human	NM_181705	LOC90624	hsa-miR-371-5p	1	-3.75
Human	NM_002486	NCBP1	hsa-miR-371-5p	1	-3.73
Human	NM_032451	SPIRE2	hsa-miR-371-5p	1	-3.73
Human	NM_020771	HACE1	hsa-miR-371-5p	1	-3.71
Human	NM_052937	PCMTD1	hsa-miR-371-5p	1	-3.7
Human	NM_018101	CDCA8	hsa-miR-371-5p	1	-3.68
Human	NM_138375	CABLES1	hsa-miR-371-5p	1	-3.68
Human	NM_152275	TTC30A	hsa-miR-371-5p	1	-3.68
Human	NM_017945	SLC35A5	hsa-miR-371-5p	1	-3.67
Human	NM_145263	SPATA18	hsa-miR-371-5p	1	-3.67
Human	NM_001023561	ZNF749	hsa-miR-371-5p	1	-3.66
Human	NM_017645	FAM29A	hsa-miR-371-5p	1	-3.66
Human	NM_001050	SSTR2	hsa-miR-371-5p	1	-3.65
Human	NM_000272	NPHP1	hsa-miR-371-5p	1	-3.63
Human	NM_015557	CHD5	hsa-miR-371-5p	1	-3.62
Human	NM_015317	PUM2	hsa-miR-371-5p	1	-3.61
Human	NM_000386	BLMH	hsa-miR-371-5p	1	-3.6
Human	NM_001561	TNFRSF9	hsa-miR-371-5p	1	-3.6
Human	NM_004947	DOCK3	hsa-miR-371-5p	1	-3.6
Human	NM_007372;NM_203499	DDX42	hsa-miR-371-5p	1	-3.6
Human	NM_138358	LOC90580	hsa-miR-371-5p	1	-3.6
Human	NM_016561	BFAR	hsa-miR-371-5p	1	-3.59
Human	NM_003437	ZNF136	hsa-miR-371-5p	1	-3.58
Human	NM_006599;NM_138713;NM_138714;NM_173214	NFAT5	hsa-miR-371-5p	1	-3.58
Human	NM_001080;NM_170740	ALDH5A1	hsa-miR-371-5p	1	-3.57
Human	NM_003017	SFRS3	hsa-miR-371-5p	1	-3.54
Human	NM_016518	PIPOX	hsa-miR-371-5p	1	-3.54
Human	NM_033225	CSMD1	hsa-miR-371-5p	1	-3.53
Human	NM_020385	REXO4	hsa-miR-371-5p	1	-3.52
Human	NM_024776	SGK269	hsa-miR-371-5p	1	-3.5
Human	NM_004798	KIF3B	hsa-miR-371-5p	1	-3.46
Human	NM_007047	BTN3A2	hsa-miR-371-5p	1	-3.46
Human	NM_001042550;NM_001042551;NM_006444	SMC2	hsa-miR-371-5p	1	-3.45
Human	NM_015017;NM_201624	USP33	hsa-miR-371-5p	1	-3.45
Human	NM_001037331	LOC284274	hsa-miR-371-5p	1	-3.44
Human	NM_201438	PPHLN1	hsa-miR-371-5p	1	-3.44
Human	NM_001077706	LFDH	hsa-miR-371-5p	1	-3.42
Human	NM_020662	MRS2L	hsa-miR-371-5p	1	-3.42
Human	NM_002350	LYN	hsa-miR-371-5p	1	-3.4
Human	NM_005082	TRIM25	hsa-miR-371-5p	1	-3.38
Human	NM_007250	KLF8	hsa-miR-371-5p	1	-3.37
Human	NM_005748	YAF2	hsa-miR-371-5p	1	-3.36
Human	NM_006197	PCM1	hsa-miR-371-5p	1	-3.36
Human	NM_001099653;NM_018172;NM_152563	FAM86C	hsa-miR-371-5p	1	-3.35
Human	NM_015626;NM_134265	WSB1	hsa-miR-371-5p	1	-3.35
Human	NM_018489	ASH1L	hsa-miR-371-5p	1	-3.29
Human	NM_153346	CXorf20	hsa-miR-371-5p	1	-3.28
Human	NM_001222;NM_172169;NM_172170;NM_172171;NM_172173	CAMK2G	hsa-miR-371-5p	1	-3.25
Human	NM_012323;NM_152878	MAFF	hsa-miR-371-5p	1	-3.25
Human	NM_031439	SOX7	hsa-miR-371-5p	1	-3.23
Human	NM_198493	ANKRD45	hsa-miR-371-5p	1	-3.23
Human	NM_005536	IMPA1	hsa-miR-371-5p	1	-3.22
Human	NM_021635	PBOV1	hsa-miR-371-5p	1	-3.22
Human	NM_015064;NM_178037;NM_178038;NM_178039;NM_178040	RAB6IP2	hsa-miR-371-5p	1	-3.21
Human	NM_030776	ZBP1	hsa-miR-371-5p	1	-3.17
Human	NM_004691	ATP6V0D1	hsa-miR-371-5p	1	-3.15
Human	NM_152903	KBTBD6	hsa-miR-371-5p	1	-3.12
Human	NM_054110	GALNTL2	hsa-miR-371-5p	1	-3.1
Human	NM_000065	C6	hsa-miR-371-5p	1	-3.08
Human	NM_020859	SHROOM3	hsa-miR-371-5p	1	-3.08
Human	NM_001031746	C10orf72	hsa-miR-371-5p	1	-3.07
Human	NM_001077498;NM_018182	C17orf63	hsa-miR-371-5p	1	-3.07
Human	NM_201252	AFAR3	hsa-miR-371-5p	1	-3.06
Human	NM_000134	FABP2	hsa-miR-371-5p	1	-3.04
Human	NM_000508	FGA	hsa-miR-371-5p	1	-3.04
Human	NM_001008564;NM_014089	NUPL1	hsa-miR-371-5p	1	-3.02
Human	NM_005857	ZMPSTE24	hsa-miR-371-5p	1	-3.01
Human	NM_006502	POLH	hsa-miR-371-5p	1	-2.99
Human	NM_001196;NM_197966;NM_197967	BID	hsa-miR-371-5p	1	-2.98
Human	NM_004458;NM_022977	ACSL4	hsa-miR-371-5p	1	-2.98
Human	NM_001007094;NM_003421	ZNF37A	hsa-miR-371-5p	1	-2.96
Human	NM_001077619	LOC137886	hsa-miR-371-5p	1	-2.96
Human	NM_012334	MYO10	hsa-miR-371-5p	1	-2.96
Human	NM_001004330	FLJ46688	hsa-miR-371-5p	1	-2.95
Human	NM_003144	SSR1	hsa-miR-371-5p	1	-2.95
Human	NM_024624	SMC6	hsa-miR-371-5p	1	-2.95
Human	NM_152332	MTAC2D1	hsa-miR-371-5p	1	-2.95
Human	NM_013296	GPSM2	hsa-miR-371-5p	1	-2.94
Human	NM_024753	TTC21B	hsa-miR-371-5p	1	-2.93
Human	NM_016653	ZAK	hsa-miR-371-5p	1	-2.92
Human	NM_033220	TRIM14	hsa-miR-371-5p	1	-2.88
Human	NM_001939	DRP2	hsa-miR-371-5p	1	-2.86
Human	NM_198066	GNPNAT1	hsa-miR-371-5p	1	-2.85
Human	NM_173084	TRIM59	hsa-miR-371-5p	1	-2.84
Human	NM_016067	MRPS18C	hsa-miR-371-5p	1	-2.83
Human	NM_176792	MRPL43	hsa-miR-371-5p	1	-2.82
Human	NM_001146	ANGPT1	hsa-miR-371-5p	2	-2.8
Human	NM_001527	HDAC2	hsa-miR-371-5p	1	-2.79
Human	NM_002017	FLI1	hsa-miR-371-5p	1	-2.77
Human	NM_003342	UBE2G1	hsa-miR-371-5p	1	-2.76
Human	NM_198076	FAM36A	hsa-miR-371-5p	1	-2.76
Human	NM_004539	NARS	hsa-miR-371-5p	1	-2.75
Human	NM_031453	FAM107B	hsa-miR-371-5p	1	-2.75
Human	NM_021825	MDS025	hsa-miR-371-5p	1	-2.74
Human	NM_022777	RABL5	hsa-miR-371-5p	1	-2.72
Human	NM_001033088;NM_016645	NGRN	hsa-miR-371-5p	1	-2.71
Human	NM_020715	PLEKHH1	hsa-miR-371-5p	1	-2.71
Human	NM_004778	GPR44	hsa-miR-371-5p	2	-2.7
Human	NM_001011708;NM_013341	PTD004	hsa-miR-371-5p	1	-2.68
Human	NM_014620;NM_153633	HOXC4	hsa-miR-371-5p	1	-2.68
Human	NM_033224	PURB	hsa-miR-371-5p	1	-2.67
Human	NM_018691	C5orf3	hsa-miR-371-5p	1	-2.66
Human	NM_024798	SNX22	hsa-miR-371-5p	1	-2.64
Human	NM_017861	PIGX	hsa-miR-371-5p	1	-2.63
Human	NM_001079524;NM_001079525;NM_006452	PAICS	hsa-miR-371-5p	1	-2.6
Human	NM_002740	PRKCI	hsa-miR-371-5p	1	-2.6
Human	NM_004852	ONECUT2	hsa-miR-371-5p	1	-2.6
Human	NM_014946;NM_199436	SPAST	hsa-miR-371-5p	1	-2.59
Human	NM_016652	CRNKL1	hsa-miR-371-5p	1	-2.57
Human	NM_173632	FLJ38288	hsa-miR-371-5p	1	-2.57
Human	NM_002936	RNASEH1	hsa-miR-371-5p	1	-2.56
Human	NM_022918	TMEM135	hsa-miR-371-5p	1	-2.56
Human	NM_001007033	CLEC6A	hsa-miR-371-5p	1	-2.55
Human	NM_145800;NM_145802	2015-09-06	hsa-miR-371-5p	1	-2.55
Human	NM_001102371;NM_024955	FOXRED2	hsa-miR-371-5p	1	-2.53
Human	NM_173808	NEGR1	hsa-miR-371-5p	1	-2.52
Human	NM_000719	CACNA1C	hsa-miR-371-5p	1	-2.5
Human	NM_080656	MGC13017	hsa-miR-371-5p	1	-2.48
Human	NM_052957	ACRC	hsa-miR-371-5p	1	-2.47
Human	NM_024860	SETD6	hsa-miR-371-5p	1	-2.46
Human	NM_000131;NM_019616	F7	hsa-miR-371-5p	1	-2.44
Human	NM_001035260;NM_004896	VPS26A	hsa-miR-371-5p	1	-2.43
Human	NM_001080485	ZNF275	hsa-miR-371-5p	1	-2.43
Human	NM_021252	RAB18	hsa-miR-371-5p	1	-2.42
Human	NM_005920	MEF2D	hsa-miR-371-5p	1	-2.41
Human	NM_001010922	C1orf178	hsa-miR-371-5p	1	-2.4
Human	NM_033505	SELI	hsa-miR-371-5p	1	-2.4
Human	NM_020397	CAMK1D	hsa-miR-371-5p	1	-2.39
Human	NM_004035;NM_007292	ACOX1	hsa-miR-371-5p	2	-2.37
Human	NM_024577	SH3TC2	hsa-miR-371-5p	1	-2.36
Human	NM_000442	PECAM1	hsa-miR-371-5p	1	-2.33
Human	NM_004586	RPS6KA3	hsa-miR-371-5p	1	-2.33
Human	NM_024993	LRRTM4	hsa-miR-371-5p	1	-2.33
Human	NM_001080395	AATK	hsa-miR-371-5p	1	-2.31
Human	NM_012199	EIF2C1	hsa-miR-371-5p	1	-2.31
Human	NM_018947	CYCS	hsa-miR-371-5p	1	-2.3
Human	NM_017778	WHSC1L1	hsa-miR-371-5p	1	-2.27
Human	NM_003292	TPR	hsa-miR-371-5p	1	-2.26
Human	NM_003051	SLC16A1	hsa-miR-371-5p	1	-2.22
Human	NM_183238	ZNF605	hsa-miR-371-5p	1	-2.16
Human	NM_020347	LZTFL1	hsa-miR-371-5p	1	-2.14
Human	NM_014023	WDR37	hsa-miR-371-5p	1	-2.13
Human	NM_033297;NM_144687	NALP12	hsa-miR-371-5p	1	-2.13
Human	NM_000340	SLC2A2	hsa-miR-371-5p	1	-2.12
Human	NM_021629	GNB4	hsa-miR-371-5p	1	-2.12
Human	NM_004264	SURB7	hsa-miR-371-5p	1	-2.1
Human	NM_024295	DERL1	hsa-miR-371-5p	1	-2.1
Human	NM_052832	SLC26A7	hsa-miR-371-5p	1	-2.1
Human	NM_002006	FGF2	hsa-miR-371-5p	1	-2.08
Human	NM_001851;NM_078485	COL9A1	hsa-miR-371-5p	1	-2.07
Human	NM_001186;NM_206866	BACH1	hsa-miR-371-5p	1	-2.04
Human	NM_014256	B3GNT3	hsa-miR-371-5p	2	-2.02
Human	NM_015906;NM_033020	TRIM33	hsa-miR-371-5p	1	-2.01
Human	NM_001008493;NM_018212	ENAH	hsa-miR-371-5p	1	-1.99
Human	NM_030809	C12orf22	hsa-miR-371-5p	1	-1.97
Human	NM_152396	METTL6	hsa-miR-371-5p	1	-1.95
Human	NM_020117	LARS	hsa-miR-371-5p	1	-1.93
Human	NM_001007525	LOC284434	hsa-miR-371-5p	1	-1.91
Human	NM_019116	UBPH	hsa-miR-371-5p	2	-1.91
Human	NM_001011538	LOC402176	hsa-miR-371-5p	1	-1.89
Human	NM_031287	SF3B5	hsa-miR-371-5p	1	-1.87
Human	NM_012382	TTC33	hsa-miR-371-5p	1	-1.86
Human	NM_138809	LOC134147	hsa-miR-371-5p	1	-1.84
Human	NM_031911	C1QTNF7	hsa-miR-371-5p	1	-1.83
Human	NM_032429	LZTS2	hsa-miR-371-5p	1	-1.82
Human	NM_012068	ATF5	hsa-miR-371-5p	1	-1.81
Human	NM_004402	DFFB	hsa-miR-371-5p	2	-1.8
Human	NM_005902	SMAD3	hsa-miR-371-5p	1	-1.8
Human	NM_000028;NM_000642;NM_000643;NM_000644;NM_000645;NM_000646	AGL	hsa-miR-371-5p	1	-1.79
Human	NM_017420	SIX4	hsa-miR-371-5p	1	-1.79
Human	NM_015090	NFASC	hsa-miR-371-5p	1	-1.78
Human	NM_017919	STX17	hsa-miR-371-5p	1	-1.77
Human	NM_019072	SGTB	hsa-miR-371-5p	1	-1.77
Human	NM_032818	C9orf100	hsa-miR-371-5p	1	-1.77
Human	NM_001040647;NM_001040648;NM_014478	RCP9	hsa-miR-371-5p	1	-1.75
Human	NM_004660	DDX3Y	hsa-miR-371-5p	1	-1.75
Human	NM_175569	XG	hsa-miR-371-5p	1	-1.75
Human	NM_005745	BCAP31	hsa-miR-371-5p	1	-1.74
Human	NM_007052;NM_013955	NOX1	hsa-miR-371-5p	1	-1.74
Human	NM_018932	PCDHB12	hsa-miR-371-5p	1	-1.74
Human	NM_002243;NM_170736;NM_170737	KCNJ15	hsa-miR-371-5p	1	-1.72
Human	NM_004454	ETV5	hsa-miR-371-5p	1	-1.72
Human	NM_005921	MAP3K1	hsa-miR-371-5p	1	-1.7
Human	NM_001033503;NM_016103	SAR1B	hsa-miR-371-5p	1	-1.69
Human	NM_021830	PEO1	hsa-miR-371-5p	1	-1.68
Human	NM_014008	CCDC22	hsa-miR-371-5p	1	-1.67
Human	NM_019005	FLJ20323	hsa-miR-371-5p	1	-1.67
Human	NM_000527	LDLR	hsa-miR-371-5p	1	-1.66
Human	NM_006626	ZBTB6	hsa-miR-371-5p	1	-1.66
Human	NM_018194	HHAT	hsa-miR-371-5p	2	-1.66
Human	NM_001219	CALU	hsa-miR-371-5p	1	-1.64
Human	NM_015245	ANKS1A	hsa-miR-371-5p	1	-1.62
Human	NM_025224	BTBD4	hsa-miR-371-5p	1	-1.59
Human	NM_001042476;NM_014316	CARHSP1	hsa-miR-371-5p	1	-1.58
Human	NM_181672;NM_181673	OGT	hsa-miR-371-5p	1	-1.58
Human	NM_016520	C9orf78	hsa-miR-371-5p	1	-1.57
Human	NM_152269	C12orf65	hsa-miR-371-5p	1	-1.57
Human	NM_015267	CUTL2	hsa-miR-371-5p	1	-1.56
Human	NM_033329;NM_053003	SIGLEC12	hsa-miR-371-5p	1	-1.56
Human	NM_021250	LILRA5	hsa-miR-371-5p	1	-1.54
Human	NM_001516	GTF2H3	hsa-miR-371-5p	1	-1.53
Human	NM_015465	GEMIN5	hsa-miR-371-5p	1	-1.52
Human	NM_018097	CEP27	hsa-miR-371-5p	1	-1.52
Human	NM_001008410;NM_018234;NM_182915	STEAP3	hsa-miR-371-5p	1	-1.47
Human	NM_016052	RRP15	hsa-miR-371-5p	1	-1.47
Human	NM_004124	GMFB	hsa-miR-371-5p	2	-1.45
Human	NM_000394	CRYAA	hsa-miR-371-5p	1	-1.44
Human	NM_002061	GCLM	hsa-miR-371-5p	1	-1.44
Human	NM_014339	IL17RA	hsa-miR-371-5p	1	-1.42
Human	NM_031905	SVH	hsa-miR-371-5p	1	-1.42
Human	NM_001042467;NM_024101	MLPH	hsa-miR-371-5p	1	-1.41
Human	NM_001042729;NM_001042747;NM_005248	FGR	hsa-miR-371-5p	1	-1.4
Human	NM_001465;NM_199335	FYB	hsa-miR-371-5p	1	-1.34
Human	NM_004630;NM_201995;NM_201998	SF1	hsa-miR-371-5p	1	-1.34
Human	NM_017745	BCOR	hsa-miR-371-5p	1	-1.34
Human	NM_017715	ZNF3	hsa-miR-371-5p	1	-1.32
Human	NM_001017392	SFRS14	hsa-miR-371-5p	1	-1.3
Human	NM_153263	ZNF549	hsa-miR-371-5p	1	-1.26
Human	NM_017550	KIAA1193	hsa-miR-371-5p	1	-1.25
Human	NM_014106	FLJ20582	hsa-miR-371-5p	1	-1.21
Human	NM_000214	JAG1	hsa-miR-371-5p	1	-1.18
Human	NM_001012393;NM_002545	OPCML	hsa-miR-371-5p	1	-1.17
Human	NM_000390	CHM	hsa-miR-371-5p	1	-1.16
Human	NM_173827	FLJ38991	hsa-miR-371-5p	1	-1.13
Human	NM_018061	PRPF38B	hsa-miR-371-5p	1	-1.12
Human	NM_004866	SCAMP1	hsa-miR-371-5p	1	-1.1
Human	NM_003002	SDHD	hsa-miR-371-5p	1	-1.09
Human	NM_001008211;NM_001008212;NM_001008213;NM_021980	OPTN	hsa-miR-371-5p	1	-1.08
Human	NM_004172	SLC1A3	hsa-miR-371-5p	1	-1.08
Human	NM_031469	SH3BGRL2	hsa-miR-371-5p	2	-1.08
Human	NM_003320;NM_177972	TUB	hsa-miR-371-5p	1	-1.07
Human	NM_032927	TMEM128	hsa-miR-371-5p	1	-1.07
Human	NM_015540	RPAP1	hsa-miR-371-5p	1	-1.02
Human	NM_015397	WDR40A	hsa-miR-371-5p	1	-1
Human	NM_020644	TMEM9B	hsa-miR-371-5p	1	-1
Human	NM_014711	CP110	hsa-miR-371-5p	1	-0.96
Human	NM_024311	ET	hsa-miR-371-5p	1	-0.96
Human	NM_032160	C18orf4	hsa-miR-371-5p	1	-0.96
Human	NM_014747	RIMS3	hsa-miR-371-5p	1	-0.95
Human	NM_030964	SPRY4	hsa-miR-371-5p	1	-0.94
Human	NM_001029861	NANOS2	hsa-miR-371-5p	1	-0.93
Human	NM_003590	CUL3	hsa-miR-371-5p	1	-0.92
Human	NM_006902;NM_022716	PRRX1	hsa-miR-371-5p	1	-0.92
Human	NM_024638	QTRTD1	hsa-miR-371-5p	1	-0.91
Human	NM_005168	RND3	hsa-miR-371-5p	1	-0.88
Human	NM_004725	BUB3	hsa-miR-371-5p	1	-0.85
Human	NM_003194	TBP	hsa-miR-371-5p	1	-0.83
Human	NM_014385;NM_016543	SIGLEC7	hsa-miR-371-5p	1	-0.83
Human	NM_021145	DMTF1	hsa-miR-371-5p	1	-0.83
Human	NM_194460	RNF126	hsa-miR-371-5p	1	-0.81
Human	NM_006800;NM_078629;NM_078630	MSL3L1	hsa-miR-371-5p	1	-0.79
Human	NM_004516;NM_153464	ILF3	hsa-miR-371-5p	1	-0.73
Human	NM_001105562;NM_006048	UBE4B	hsa-miR-371-5p	1	-0.66
Human	NM_001097620	MGC9712	hsa-miR-371-5p	1	-0.64
Human	NM_001105529;NM_006095	ATP8A1	hsa-miR-371-5p	1	-0.64
Human	NM_138368	DKFZp761E198	hsa-miR-371-5p	1	-0.62
Human	NM_000554	CRX	hsa-miR-371-5p	1	-0.59
Human	NM_014421	DKK2	hsa-miR-371-5p	1	-0.51
Human	NM_001106	ACVR2B	hsa-miR-371-5p	1	-0.49
Human	NM_052886	MAL2	hsa-miR-371-5p	1	-0.48
Human	NM_052853	ADCK2	hsa-miR-371-5p	1	-0.47
Human	NM_017434;NM_175940	DUOX1	hsa-miR-371-5p	1	-0.46
Human	NM_012198	GCA	hsa-miR-371-5p	1	-0.44
Human	NM_015293;NM_033071;NM_133650;NM_182961	SYNE1	hsa-miR-371-5p	1	-0.42
Human	NM_006037	HDAC4	hsa-miR-371-5p	1	-0.33
Human	NM_032495;NM_139211;NM_139212	HOP	hsa-miR-371-5p	1	-0.32
Human	NM_152347	C17orf57	hsa-miR-371-5p	1	-0.3
Human	NM_007048	BTN3A1	hsa-miR-371-5p	1	-0.29
Human	NM_145912	NFAM1	hsa-miR-371-5p	1	-0.29
Human	NM_130446	KLHL6	hsa-miR-371-5p	1	-0.28
Human	NM_138370	LOC91461	hsa-miR-371-5p	1	-0.28
Human	NM_020752	GPR158	hsa-miR-371-5p	1	-0.27
Human	NM_002645	PIK3C2A	hsa-miR-371-5p	1	-0.26
Human	NM_001014283	DCUN1D2	hsa-miR-371-5p	1	-0.23
Human	NM_020315	PDXP	hsa-miR-371-5p	1	-0.23
Human	NM_013435	RAX	hsa-miR-371-5p	1	-0.22
Human	NM_015166;NM_139202	MLC1	hsa-miR-371-5p	1	-0.21
Human	NM_006948	STCH	hsa-miR-371-5p	1	-0.16
Human	NM_004491	GRLF1	hsa-miR-371-5p	1	-0.15
Human	NM_022103	ZNF667	hsa-miR-371-5p	1	-0.14
Human	NM_017583	TRIM44	hsa-miR-371-5p	1	-0.033
Human	NM_018440	PAG1	hsa-miR-371-5p	1	0.023
Human	NM_024086	METT10D	hsa-miR-371-5p	1	0.057
Human	NM_000510;NM_001018080	FSHB	hsa-miR-371-5p	1	0.093
Human	NM_030639	BHLHB9	hsa-miR-371-5p	1	0.097
Human	NM_001017440;NM_031468	CALN1	hsa-miR-371-5p	1	0.1
Human	NM_018112	TMEM38B	hsa-miR-371-5p	1	0.1
Human	NM_207352	CYP4V2	hsa-miR-371-5p	1	0.11
Human	NM_003455	ZNF202	hsa-miR-371-5p	1	0.14
Human	NM_144990	FLJ23878	hsa-miR-371-5p	1	0.14
Human	NM_001008405;NM_018844	BCAP29	hsa-miR-371-5p	1	0.17
Human	NM_003423	ZNF43	hsa-miR-371-5p	1	0.17
Human	NM_004555;NM_173163;NM_173165	NFATC3	hsa-miR-371-5p	1	0.17
Human	NM_152356	ZNF491	hsa-miR-371-5p	1	0.17
Human	NM_014232	VAMP2	hsa-miR-371-5p	1	0.2
Human	NM_005160	ADRBK2	hsa-miR-371-5p	1	0.26
Human	NM_024899	CEP76	hsa-miR-371-5p	1	0.28
Human	NM_014873	LPGAT1	hsa-miR-371-5p	1	0.32
Human	NM_006389	HYOU1	hsa-miR-371-5p	1	0.37
Human	NM_001017523;NM_001018072;NM_152322	BTBD11	hsa-miR-371-5p	1	0.38
Human	NM_032787	GPR128	hsa-miR-371-5p	1	0.41
Human	NM_003787	NOL4	hsa-miR-371-5p	1	0.43
Human	NM_015850;NM_023105;NM_023106;NM_023110;NM_023111	FGFR1	hsa-miR-371-5p	1	0.45
Human	NM_001966	EHHADH	hsa-miR-371-5p	1	0.46
Human	NM_000259	MYO5A	hsa-miR-371-5p	1	0.47
Human	NM_015055	SWAP70	hsa-miR-371-5p	1	0.49
Human	NM_001011663;NM_032154	PCGF6	hsa-miR-371-5p	1	0.5
Human	NM_014692	SEC14L5	hsa-miR-371-5p	1	0.52
Human	NM_153015	TMEM74	hsa-miR-371-5p	1	0.53
Human	NM_020801	ARRDC3	hsa-miR-371-5p	1	0.56
Human	NM_004739	MTA2	hsa-miR-371-5p	1	0.62
Human	NM_006773	DDX18	hsa-miR-371-5p	1	0.62
Human	NM_019624;NM_019625;NM_203444	ABCB9	hsa-miR-371-5p	1	0.65
Human	NM_005067	SIAH2	hsa-miR-371-5p	1	0.67
Human	NM_001077196;NM_001077197;NM_016953	PDE11A	hsa-miR-371-5p	1	0.73
Human	NM_177532;NM_201431	RASSF6	hsa-miR-371-5p	1	0.81
Human	NM_016540	GPR83	hsa-miR-371-5p	1	0.87
Human	NM_007249	KLF12	hsa-miR-371-5p	1	0.92
Human	NM_020338	RAI17	hsa-miR-371-5p	1	0.96
Human	NM_024953	C12orf30	hsa-miR-371-5p	1	0.96
Human	NM_018660	ZNF395	hsa-miR-371-5p	1	0.98
Human	NM_032587	CARD6	hsa-miR-371-5p	1	1.01
Human	NM_015036	ENDOD1	hsa-miR-371-5p	1	1.02
Human	NM_004931;NM_172099	CD8B	hsa-miR-371-5p	1	1.03
Human	NM_018243	2015-09-11	hsa-miR-371-5p	1	1.19
Human	NM_021201;NM_206938;NM_206939;NM_206940	MS4A7	hsa-miR-371-5p	1	1.27
Human	NM_004745	DLGAP2	hsa-miR-371-5p	1	1.41
Human	NM_005454	CER1	hsa-miR-371-5p	1	1.41
Human	NM_001029955	WDR21B	hsa-miR-371-5p	1	1.42
Human	NM_001083617;NM_014781	RB1CC1	hsa-miR-371-5p	1	1.42
Human	NM_002492	NDUFB5	hsa-miR-371-5p	1	1.43
Human	NM_182603	ANKRD42	hsa-miR-371-5p	1	1.54
Human	NM_001040059;NM_001251	CD68	hsa-miR-371-5p	1	1.84
Human	NM_024593	EFCAB1	hsa-miR-371-5p	1	1.85
Human	NM_001015881;NM_004089;NM_198057	TSC22D3	hsa-miR-371-5p	1	1.93
Human	NM_004566	PFKFB3	hsa-miR-371-5p	1	1.94
Human	NM_001440	EXTL3	hsa-miR-371-5p	1	2
Human	NM_152754	SEMA3D	hsa-miR-371-5p	1	2.09
Human	NM_001048183;NM_023923	PHACTR4	hsa-miR-371-5p	1	2.15
Human	NM_004781	VAMP3	hsa-miR-371-5p	1	2.2
Human	NM_022087	GALNT11	hsa-miR-371-5p	1	2.24
Human	NM_001079533;NM_001079534;NM_001079535;NM_030594	CPEB1	hsa-miR-371-5p	1	2.34
Human	NM_003012	SFRP1	hsa-miR-371-5p	1	2.65
Human	NM_030915	LBH	hsa-miR-371-5p	1	2.99
Human	NM_001031680;NM_004350	RUNX3	hsa-miR-371-5p	1	3.02
Human	NM_178176	MOGAT3	hsa-miR-371-5p	1	3.08
Human	NM_004505	USP6	hsa-miR-371-5p	1	3.1
Human	NM_017670	OTUB1	hsa-miR-371-5p	1	3.11
Human	NM_032947	MST150	hsa-miR-371-5p	1	3.18
Human	NM_001013642	LOC388610	hsa-miR-371-5p	1	3.25
Human	NM_024512	LRRC2	hsa-miR-371-5p	1	3.32
Human	NM_152695	ZNF449	hsa-miR-371-5p	1	3.43
Human	NM_199044	NSUN4	hsa-miR-371-5p	1	3.46
Human	NM_007050;NM_133170	PTPRT	hsa-miR-371-5p	1	3.82
Human	NM_001105520	LOC388327	hsa-miR-371-5p	1	4.09
Human	NM_001652	AQP6	hsa-miR-371-5p	1	4.83
Human	NM_004822	NTN1	hsa-miR-371-5p	1	4.83
Human	NM_001038707;NM_020239	CDC42SE1	hsa-miR-371-5p	1	5
Human	NM_001040142;NM_001040143;NM_021007	SCN2A2	hsa-miR-371-5p	1	5.17
Human	NM_020939	CPNE5	hsa-miR-371-5p	1	5.68
Human	NM_016498	MTP18	hsa-miR-371-5p	1	6.33
Human	NM_014804	KIAA0753	hsa-miR-371-5p	1	6.34
Human	NM_001099403;NM_020226	PRDM8	hsa-miR-371-5p	1	6.52
Human	NM_015016	MAST3	hsa-miR-371-5p	1	6.69
Human	NM_005020	PDE1C	hsa-miR-371-5p	1	7.21
Human	NM_006920	SCN1A	hsa-miR-371-5p	1	7.99
Human	NM_001013690	LOC401720	hsa-miR-371-5p	1	8.25
