# Supplementary material for: Models of human core transcriptional regulatory circuitries
Source: HighWire-hosted journal article supplement (doi:10.1101/gr.197590.115), 2016-02-03
Supplement: TableS8.xlsx [file TableS8.xlsx]

## Sheet: Sheet1
Table S8: Comparison of CRCs with Neph et al. Networks for similar cell types
Sample	Brain Hippocampus middle	CD20	GM12878	HepG2	HSMMtube	IMR90	K562	Left ventricle	NHDF-Ad	NHLF
Sample in Neph et al.	Brain	CD20+	GM12878	HepG2	HSMMtube	IMR90	K562	Heart	NHDF-Ad	NHLF
Number of CRC TF-TF interactions considered	324	729	49	25	225	100	25	324	121	256
Number of CRC TF-TF interactions overlapping with Neph et al. network	28	175	4	2	38	23	3	44	17	47
Number of overlapping TF-TF interactions obtained for the same number of randomly selected non CRC TFs	7	36	3	1	3	3	0	11	1	6
Percentage of CRC TF-TF interactions overlapping with Neph et al. network (%)	8.64198	24.0055	8.16327	8	16.8889	23	12	13.5802	14.0496	18.3594
Percentage of overlapping TF-TF interactions obtained for the same number of randomly selected non CRC TFs (%)	2.16049	4.93827	6.12245	4	1.33333	3	0	3.39506	0.826446	2.34375
Significance p-value	0.001018	< 2.2e-16	1	1	3.721e-07	0.000474	0.2759	3.531e-05	0.0006727	1.689e-07
